# Supplementary material for: Toxicogenomics in a soil sentinel exposure to Zn nanoparticles and ions reveals the comparative role of toxicokinetic and toxicodynamic mechanisms
Source: Royal Society of Chemistry journal article supplement (doi:10.1039/c9en01124b), 2020-01-01
Supplement: c9en01124b3.pdf [file c9en01124b3.pdf]

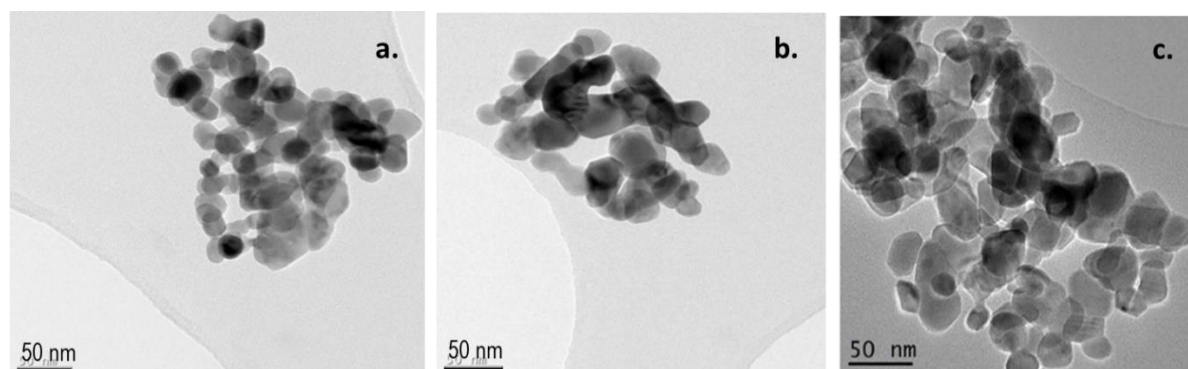

**Supplementary File S2, figure:** TEM images of 30 nm ZnO NP analysed from the storage container at the beginning of the experiments. These are identical particles to those used in Heggelund et al 2014; Nanoparticles sampled from (a) the top and (b) bottom of storage container, (c) is the original TEM image from Heggelund et al 2014.

**Supplementary File S2, table:** Characterisation data for ZnO NP with XRD, BET and density measurements.<sup>1</sup>

| Measurement type                                       | ZnO NP measurement            |
|--------------------------------------------------------|-------------------------------|
| Average crystalline size from Scherrer's formula (XRD) | a = 25 nm, c = 27 nm          |
| Grain size from SSA BET                                | 29 nm                         |
| Specific Surface Area (BET)                            | 38 m <sup>2</sup> /g          |
| Density                                                | 5.52 ± 0.05 g/cm <sup>3</sup> |
| Zeta potential in DI water                             | 20.7 ± 2 mV                   |

1. L. R. Heggelund, M. Diez-Ortiz, S. Lofts, E. Lahive, K. Jurkschat, J. Wojnarowicz, N. Cedergreen, D. Spurgeon and C. Svendsen, Soil pH effects on the comparative toxicity of dissolved zinc, non-nano and nano ZnO to the earthworm *Eisenia fetida*, *Nanotoxicology*, 2014, **8**, 559-572.
