# Supplementary material for: Toxicogenomics in a soil sentinel exposure to Zn nanoparticles and ions reveals the comparative role of toxicokinetic and toxicodynamic mechanisms
Source: Royal Society of Chemistry journal article supplement (doi:10.1039/c9en01124b), 2020-01-01
Supplement: c9en01124b5.pdf [file c9en01124b5.pdf]

**Supplementary File S4:** The survival of earthworm and their body concentrations of zinc exposed to ionic Zn and ZnO NPs after 28 days in soil.

| Soil concentration<br>(mg/kg) | Survival  |           | Body concentration |           |
|-------------------------------|-----------|-----------|--------------------|-----------|
|                               | Ionic Zn  | ZnO NP    | Ionic Zn           | ZnO NP    |
| 0                             | 9.5 ± 0.8 | 9.5 ± 0.8 | 101.5 ± 3.6        |           |
| 100                           | 10 ± 0    | -         | 131 ± 4.2          | n.a       |
| 225                           | 10 ± 0    | 10 ± 0    | 142 ± 7.0          | 120 ± 0.6 |
| 500                           | 9.7 ± 0.6 | 9.7 ± 0.6 | 153 ± 5.5          | 140 ± 2.1 |
| 1100                          | 0         | 9.7 ± 0.6 | 150*               | 172 ± 24  |
| 2200                          | 0         | 9.3 ± 1.2 | n.a                | 234 ± 33  |
| 4400                          | -         | 10 ± 0    | n.a                | 417 ± 145 |

\* There was only a single replicate with surviving earthworms with which to perform analysis. N.a indicates there were not earthworms with which analysis could be performed. The control (0 mg/kg nominal) was shared for the two Zn forms. Mean ± stdev. n=3
