# Supplementary material for: Toxicogenomics in a soil sentinel exposure to Zn nanoparticles and ions reveals the comparative role of toxicokinetic and toxicodynamic mechanisms
Source: Royal Society of Chemistry journal article supplement (doi:10.1039/c9en01124b), 2020-01-01
Supplement: c9en01124b6.pdf [file c9en01124b6.pdf]

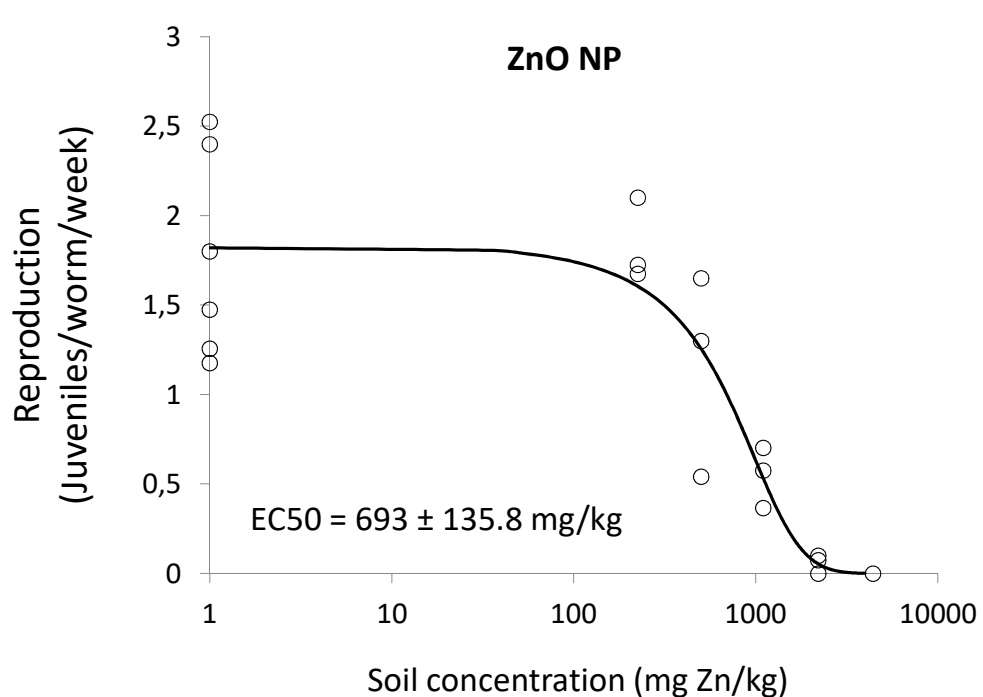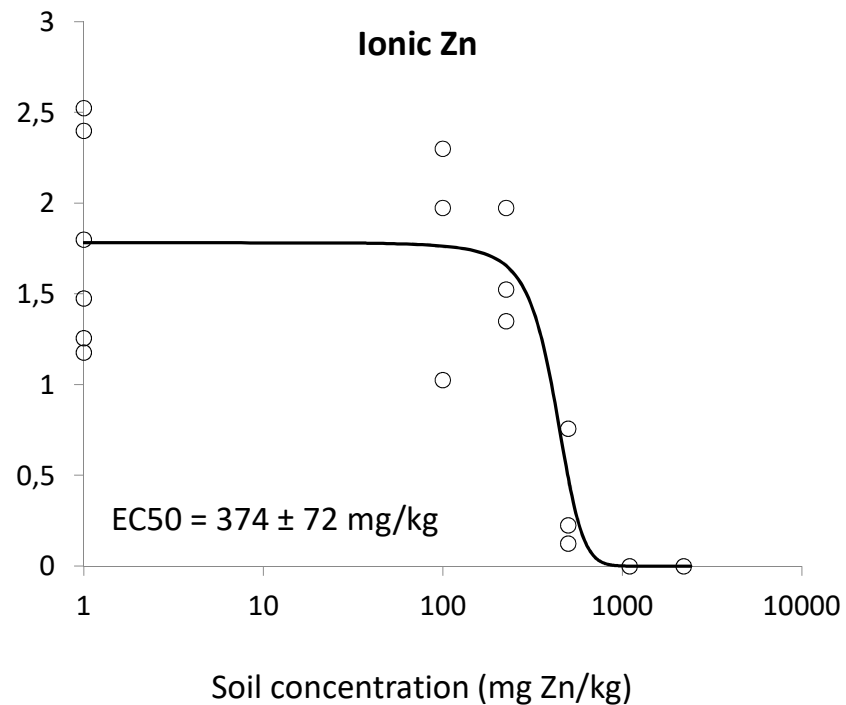

**Supplementary File S5:** The reproduction of earthworms exposed to ZnO NPs and ionic Zn in Lufa 2.2 soils after 56 days exposure. Exposure was based on the total concentration of Zn in the soil. The symbols represent the reproduction (juveniles per worm per week) for each replicate at each concentration and the solid line represents the logistic model fit.
