# Supplementary material for: Toxicogenomics in a soil sentinel exposure to Zn nanoparticles and ions reveals the comparative role of toxicokinetic and toxicodynamic mechanisms
Source: Royal Society of Chemistry journal article supplement (doi:10.1039/c9en01124b), 2020-01-01
Supplement: c9en01124b7.xlsx [file c9en01124b7.xlsx]

## Sheet: Zn NPs vs ions
gene	length	logFC	logCPM	PValue	FDR	HitName	HitDesc	HitSignif	HSP_rank	X,ID	eValue	HSP_length
comp249852_c1_seq3	len=971	8.01612	2.55052	2.11e-31	1.17e-26	sp|Q9V730|EXT1_DROME	Exostosin-1 OS=Drosophila melanogaster GN=ttv PE=1 SV=1	3e-20	1	32.5843	3e-20	178
comp258226_c1_seq2	len=1044	7.91789	-0.294781	1.18e-14	5.04e-11	sp|Q460N5|PAR14_HUMAN	Poly [ADP-ribose] polymerase 14 OS=Homo sapiens GN=PARP14 PE=1 SV=3	3e-12	1	22.3975	3e-12	317
comp258979_c0_seq4	len=2693	4.73014	0.483485	4.24e-13	1.38e-09	sp|Q60803|TRAF3_MOUSE	TNF receptor-associated factor 3 OS=Mus musculus GN=Traf3 PE=1 SV=2	1e-118	1	37.5465	1e-118	538
comp256065_c0_seq1	len=1914	-7.5996	0.170636	2.18e-11	4.07e-08	sp|Q54RP0|AGTA_DICDI	UDP-galactose:fucoside alpha-3-galactosyltransferase OS=Dictyostelium discoideum GN=agtA PE=1 SV=1	4e-11	1	28.1407	4e-11	199
comp261791_c0_seq3	len=274	3.58167	0.198672	2.44e-11	4.21e-08	sp|Q14315|FLNC_HUMAN	Filamin-C OS=Homo sapiens GN=FLNC PE=1 SV=3	2e-09	1	38.0282	2e-09	71
comp216531_c0_seq2	len=869	-8.18558	0.486936	6.27e-11	9.86e-08	sp|P05434|CATR_CHLRE	Caltractin OS=Chlamydomonas reinhardtii PE=1 SV=1	4e-07	1	41.5584	4e-07	77
comp466467_c0_seq1	len=461	7.8276	0.317606	6.42e-11	9.86e-08	sp|P04571|SCP_HEDDI	Sarcoplasmic calcium-binding protein OS=Hediste diversicolor PE=1 SV=1	3e-25	1	34.8684	3e-25	152
comp258081_c0_seq6	len=1891	7.43258	0.730039	1.1e-10	1.56e-07	sp|Q7ZYJ9|AASDB_XENLA	Alanyl-tRNA editing protein Aarsd1-B OS=Xenopus laevis GN=aarsd1-b PE=2 SV=1	1e-161	1	56.7237	1e-161	409
comp236455_c0_seq1	len=504	5.07504	1.34056	1.13e-10	1.56e-07	sp|Q8VHE6|DYH5_MOUSE	Dynein heavy chain 5		NA			NA
comp261777_c2_seq2	len=5013	5.68697	2.05391	4.17e-10	5.12e-07	sp|Q8C419|GP158_MOUSE	Probable G-protein coupled receptor 158 OS=Mus musculus GN=Gpr158 PE=1 SV=2	5e-14	1	37.931	5e-14	116
comp260629_c0_seq1	len=2676	-5.6265	0.41703	7.73e-10	8.91e-07	sp|O35136|NCAM2_MOUSE	Neural cell adhesion molecule 2 OS=Mus musculus GN=Ncam2 PE=1 SV=1	2e-06	1	22.1429	2e-06	280
comp260123_c0_seq2	len=2881	5.06173	-0.0308157	2.5e-09	2.47e-06	sp|A7E3W5|SNG2_BOVIN	Synaptogyrin-2 OS=Bos taurus GN=SYNGR2 PE=2 SV=1	8e-26	1	35.9116	8e-26	181
comp259716_c0_seq2	len=2823	-8.1594	0.211547	3.11e-09	2.93e-06	sp|A2T737|EHF_PANTR	ETS homologous factor OS=Pan troglodytes GN=EHF PE=3 SV=1	2e-17	1	43.299	2e-17	97
comp236455_c1_seq1	len=1344	4.16934	2.90501	3.18e-09	2.93e-06	sp|Q8VHE6|DYH5_MOUSE	Dynein heavy chain 5		NA			NA
comp246054_c0_seq2	len=955	-5.43177	1.1431	4.01e-08	3.08e-05	sp|A2VDF0|FUCM_HUMAN	Fucose mutarotase OS=Homo sapiens GN=FUOM PE=1 SV=2	6e-61	1	63.6986	6e-61	146
comp150729_c0_seq1	len=2715	-6.73449	6.62094	2.02e-07	0.00013607	sp|Q03185|TS11_GIAIN	Major surface trophozoite antigen 11 OS=Giardia intestinalis GN=TSP11 PE=3 SV=1	1e-28	1	28.7356	1e-28	435
comp234634_c0_seq1	len=590	3.75258	1.36259	5.19e-07	0.000322695	sp|Q8TE73|DYH5_HUMAN	Dynein heavy chain 5		NA			NA
comp253071_c0_seq2	len=573	-4.71377	-0.0309781	1.15e-06	0.000666509	sp|Q69566|U88_HHV6U	Uncharacterized protein U88 OS=Human herpesvirus 6A (strain Uganda-1102) GN=U88 PE=4 SV=1	3e-07	1	59.1837	3e-07	49
comp230286_c2_seq1	len=1496	-3.28397	2.62527	7.69e-06	0.00387279	sp|P04323|POL3_DROME	Retrovirus-related Pol polyprotein from transposon 17,6 OS=Drosophila melanogaster GN=pol PE=4 SV=1	7e-39	1	38.3621	7e-39	232
comp199294_c0_seq1	len=251	3.56414	1.02965	8.43e-06	0.00416402	sp|P86854|PLCL_MYTGA	Perlucin-like protein OS=Mytilus galloprovincialis PE=1 SV=1	5e-06	1	40.4255	5e-06	47
comp261794_c2_seq1	len=3502	3.10234	-0.0501122	1.02e-05	0.00485111	sp|A5WW21|RASEF_DANRE	Ras and EF-hand domain-containing protein OS=Danio rerio GN=rasef PE=2 SV=1	1e-55	1	26.4241	1e-55	632
comp231300_c0_seq2	len=726	-2.95798	1.24543	1.08e-05	0.00510578	sp|Q6PEH9|S39AA_DANRE	Zinc transporter ZIP10 OS=Danio rerio GN=slc39a10 PE=2 SV=1	2e-44	1	49.6855	2e-44	159
comp239375_c0_seq1	len=1819	2.88503	6.69612	1.17e-05	0.0054482	sp|Q95SX7|RTBS_DROME	Probable RNA-directed DNA polymerase from transposon BS OS=Drosophila melanogaster GN=RTase PE=2 SV=1	1e-30	1	25.7353	1e-30	408
comp217491_c1_seq1	len=854	-5.40585	2.71792	1.93e-05	0.00822693	sp|P42519|STAR_DROME	Protein Star OS=Drosophila melanogaster GN=S PE=2 SV=1	4e-11	1	33.6364	4e-11	110
comp260970_c0_seq2	len=2037	-3.02217	0.0564752	2.58e-05	0.0101331	sp|Q8VEK0|CC50A_MOUSE	Cell cycle control protein 50A OS=Mus musculus GN=Tmem30a PE=1 SV=1	1e-108	1	53.1722	1e-108	331
comp258546_c2_seq5	len=703	-3.05697	3.09331	2.73e-05	0.0105651	sp|O02350|CBPA1_ANOGA	Zinc carboxypeptidase A 1 OS=Anopheles gambiae GN=AGAP009593 PE=2 SV=3	2e-15	1	23.1707	2e-15	164
comp249417_c0_seq1	len=725	1.89151	1.4955	3.6e-05	0.0133774	sp|O42414|NFASC_CHICK	Neurofascin OS=Gallus gallus GN=NFASC PE=1 SV=1	6e-19	1	31.3953	6e-19	172
comp243821_c2_seq1	len=451	2.13955	1.5501	3.8e-05	0.0138532	sp|Q9Z0M6|CD97_MOUSE	CD97 antigen OS=Mus musculus GN=Cd97 PE=1 SV=2	6e-10	1	44.1176	6e-10	68
comp255281_c1_seq1	len=942	-2.25054	2.37236	4.08e-05	0.014464	sp|Q52N47|ITM2B_PIG	Integral membrane protein 2B OS=Sus scrofa GN=ITM2B PE=2 SV=1	2e-17	1	29.7872	2e-17	141
comp259672_c0_seq1	len=3110	-2.97115	0.157802	4.43e-05	0.015322	sp|Q8BGD7|NPAS4_MOUSE	Neuronal PAS domain-containing protein 4 OS=Mus musculus GN=Npas4 PE=1 SV=1	9e-48	1	36.9048	9e-48	336
comp203194_c0_seq1	len=624	-3.30248	1.14125	4.54e-05	0.0155891	sp|Q60847|COCA1_MOUSE	Collagen alpha-1(XII) chain OS=Mus musculus GN=Col12a1 PE=2 SV=3	3e-07	1	28.0303	3e-07	132
comp259462_c0_seq2	len=2370	2.6916	0.170637	4.8e-05	0.0163896	sp|Q800L3|MED22_CHICK	Mediator of RNA polymerase II transcription subunit 22 OS=Gallus gallus GN=MED22 PE=3 SV=1	4e-43	1	54.5455	4e-43	143
comp243821_c1_seq1	len=328	2.21259	0.828094	5.56e-05	0.0184066	sp|P23142|FBLN1_HUMAN	Fibulin-1 OS=Homo sapiens GN=FBLN1 PE=1 SV=4	7e-24	1	52.7473	7e-24	91
comp241047_c0_seq2	len=1150	-3.10104	2.49004	7.74e-05	0.0247393	sp|Q96MU6|ZN778_HUMAN	Zinc finger protein 778 OS=Homo sapiens GN=ZNF778 PE=2 SV=3	2e-38	1	39.3443	2e-38	183
comp258546_c3_seq1	len=237	-2.7582	1.22562	0.000106926	0.0316267	sp|P42788|CBPZ_SIMVI	Zinc carboxypeptidase (Fragment) OS=Simulium vittatum PE=2 SV=1	1e-27	1	55.6962	1e-27	79
comp250652_c0_seq2	len=1351	-2.68699	0.76839	0.000134482	0.037758	sp|A6H8Z2|F221B_HUMAN	Protein FAM221B OS=Homo sapiens GN=FAM221B PE=2 SV=2	7e-76	1	55.6122	7e-76	196
comp260123_c0_seq1	len=2892	-3.07846	1.11923	0.000161191	0.043491	sp|A7E3W5|SNG2_BOVIN	Synaptogyrin-2 OS=Bos taurus GN=SYNGR2 PE=2 SV=1	4e-26	1	34.8718	4e-26	195
comp253941_c0_seq1	len=733	2.50549	0.576884	0.000170627	0.0455922	sp|P39428|TRAF1_MOUSE	TNF receptor-associated factor 1 OS=Mus musculus GN=Traf1 PE=1 SV=2	4e-38	1	61.165	4e-38	103
comp255238_c0_seq2	len=1491	-2.34706	0.898585	0.000208738	0.0524795	sp|Q63ZL2|HOP2_XENLA	Homologous-pairing protein 2 homolog OS=Xenopus laevis GN=psmc3ip PE=2 SV=1	2e-66	1	52.3364	2e-66	214
comp254202_c0_seq4	len=277	-2.69725	1.16153	0.000280993	0.0675739	sp|P10076|ZFP26_MOUSE	Zinc finger protein 26 OS=Mus musculus GN=Zfp26 PE=2 SV=2	4e-24	1	48.8636	4e-24	88
comp243020_c1_seq1	len=553	-2.79695	2.94079	0.000319914	0.0758262	sp|Q6UWM7|LCTL_HUMAN	Lactase-like protein OS=Homo sapiens GN=LCTL PE=1 SV=2	2e-43	1	44.7205	2e-43	161
comp249417_c2_seq2	len=872	1.55817	0.992417	0.000390695	0.0874888	sp|O42414|NFASC_CHICK	Neurofascin OS=Gallus gallus GN=NFASC PE=1 SV=1	8e-27	1	28.0405	8e-27	296
comp257252_c2_seq1	len=2074	-2.31239	5.83812	0.000460128	0.100197	sp|O94264|YORF_SCHPO	Uncharacterized RING finger protein P8B7,15c OS=Schizosaccharomyces pombe (strain 972 / ATCC 24843) GN=SPBP8B7,15c PE=4 SV=1	5e-11	1	31.9328	5e-11	119
comp199185_c0_seq1	len=925	1.89594	1.87562	0.00048194	0.104521	sp|Q80WQ9|ZBED4_MOUSE	Zinc finger BED domain-containing protein 4 OS=Mus musculus GN=Zbed4 PE=2 SV=1	2e-07	1	24.1071	2e-07	224
comp261970_c0_seq1	len=4534	-2.67699	2.78221	0.000531671	0.113542	sp|Q921M4|GOGA2_MOUSE	Golgin subfamily A member 2 OS=Mus musculus GN=Golga2 PE=1 SV=3	2e-32	1	22.7468	2e-32	699
comp162228_c0_seq1	len=297	1.66224	0.553635	0.000589679	0.122616	sp|Q64487|PTPRD_MOUSE	Receptor-type tyrosine-protein phosphatase delta OS=Mus musculus GN=Ptprd PE=1 SV=3	2e-42	1	69.3878	2e-42	98
comp255110_c0_seq3	len=826	2.32107	1.59239	0.000593373	0.122922	sp|P17136|RSMB_RAT	Small nuclear ribonucleoprotein-associated protein B (Fragment) OS=Rattus norvegicus GN=Snrpb PE=2 SV=1	7e-22	1	56.383	7e-22	94
comp238886_c2_seq1	len=517	-2.36209	0.426079	0.000612184	0.125095	sp|P15620|ZN271_MOUSE	Zinc finger protein 271 OS=Mus musculus GN=Znf271 PE=2 SV=1	2e-13	1	50	2e-13	58
comp244822_c0_seq4	len=920	1.85652	2.71409	0.000614822	0.125095	sp|P10610|CP2G1_RAT	Cytochrome P450 2G1 OS=Rattus norvegicus GN=Cyp2g1 PE=2 SV=1	8e-18	1	35.5556	8e-18	180
comp261638_c1_seq22	len=3114	1.76279	0.807029	0.000704071	0.136164	sp|Q8MPM1|GELS2_LUMTE	Gelsolin-like protein 2 OS=Lumbricus terrestris GN=gelsolin PE=1 SV=1	0	1	82.0163	0	367
comp243136_c0_seq1	len=748	-2.00006	1.68026	0.000785615	0.1478	sp|Q96M20|CNBD2_HUMAN	Cyclic nucleotide-binding domain-containing protein 2 OS=Homo sapiens GN=CNBD2 PE=2 SV=2	2e-18	1	27.2277	2e-18	202
comp244912_c1_seq1	len=496	2.21182	1.32523	0.000813364	0.151983	sp|P04572|SCP_PERVT	Sarcoplasmic calcium-binding protein OS=Perinereis vancaurica tetradentata PE=1 SV=1	2e-10	1	36.9048	2e-10	84
comp252165_c1_seq2	len=1091	-2.3774	2.49802	0.000845129	0.156862	sp|P10079|FBP1_STRPU	Fibropellin-1 OS=Strongylocentrotus purpuratus GN=EGF1 PE=1 SV=2	5e-17	1	28.1022	5e-17	274
comp254280_c0_seq1	len=1040	-2.5836	2.34503	0.000908375	0.163127	sp|Q2VPM9|TPPP3_XENLA	Tubulin polymerization-promoting protein family member 3 OS=Xenopus laevis GN=tppp3 PE=2 SV=1	1e-41	1	47.9042	1e-41	167
comp259955_c0_seq1	len=800	-1.88535	0.903008	0.000920143	0.164174	sp|Q5F383|SPP2B_CHICK	Signal peptide peptidase-like 2B OS=Gallus gallus GN=SPPL2B PE=2 SV=1	4e-07	1	44.0678	4e-07	59
comp263009_c0_seq1	len=472	-5.27496	6.02093	0.000975801	0.172152	sp|P35003|CTRL_HALRU	Chymotrypsin-like serine proteinase OS=Haliotis rufescens PE=1 SV=1	2e-33	1	41.0256	2e-33	156
comp246431_c0_seq1	len=245	-2.09058	0.164586	0.000998172	0.174268	sp|Q9QWF0|CAF1A_MOUSE	Chromatin assembly factor 1 subunit A OS=Mus musculus GN=Chaf1a PE=1 SV=1	2e-07	1	38.2716	2e-07	81
comp261555_c1_seq5	len=1150	-2.1045	3.96137	0.00102545	0.177246	sp|Q9NQE7|TSSP_HUMAN	Thymus-specific serine protease OS=Homo sapiens GN=PRSS16 PE=2 SV=2	2e-58	1	37.1622	2e-58	296
comp166132_c0_seq1	len=268	-1.6428	0.531505	0.00114803	0.194186	sp|O09032|ELAV4_RAT	ELAV-like protein 4 OS=Rattus norvegicus GN=Elavl4 PE=1 SV=1	8e-39	1	73.8636	8e-39	88
comp260858_c0_seq3	len=999	2.61626	1.52271	0.00116488	0.195122	sp|P37167|ACTP_ACACA	Actophorin OS=Acanthamoeba castellanii PE=1 SV=2	8e-35	1	45.8015	8e-35	131
comp253718_c1_seq8	len=355	-1.95378	0.954258	0.00132849	0.211696	sp|Q9JLB4|CUBN_MOUSE	Cubilin OS=Mus musculus GN=Cubn PE=1 SV=3	1e-09	1	38.75	1e-09	80
comp261670_c0_seq1	len=3188	-3.62257	5.88566	0.00133576	0.211696	sp|Q8C827|ZFP62_MOUSE	Zinc finger protein 62 OS=Mus musculus GN=Zfp62 PE=2 SV=1	1e-14	1	50.6494	1e-14	77
comp189633_c0_seq1	len=267	1.92539	0.070345	0.00146896	0.226954	sp|Q54VM3|TBC5A_DICDI	TBC1 domain family member 5 homolog A OS=Dictyostelium discoideum GN=tbc1d5A PE=1 SV=1	7e-07	1	32.5581	7e-07	86
comp254656_c0_seq3	len=1322	1.84049	3.78779	0.00150365	0.231325	sp|P04572|SCP_PERVT	Sarcoplasmic calcium-binding protein OS=Perinereis vancaurica tetradentata PE=1 SV=1	4e-22	1	33.3333	4e-22	180
comp201709_c0_seq1	len=377	1.82423	0.802091	0.00156007	0.235994	sp|D3YX43|VSI10_MOUSE	V-set and immunoglobulin domain-containing protein 10 OS=Mus musculus GN=Vsig10 PE=2 SV=2	4e-07	1	32.5	4e-07	120
comp156607_c0_seq1	len=1481	3.04731	6.77406	0.00156415	0.235994	sp|P09352|SR2A_PHYPO	Spherulin-2A OS=Physarum polycephalum PE=2 SV=1	1e-40	1	31.8021	1e-40	283
comp262076_c0_seq20	len=1003	1.48407	0.892996	0.00169224	0.248935	sp|Q0IIV2|RHBG_XENTR	Ammonium transporter Rh type B OS=Xenopus tropicalis GN=rhbg PE=2 SV=1	1e-39	1	52.7778	1e-39	144
comp261440_c0_seq3	len=2862	1.5391	0.370607	0.00189433	0.26935	sp|A7Y2W8|SC6A9_XENLA	Sodium- and chloride-dependent glycine transporter 1 OS=Xenopus laevis GN=slc6a9 PE=2 SV=1	1e-141	1	39.688	1e-141	577
comp258226_c1_seq3	len=1131	1.97729	1.18762	0.0023379	0.313863	sp|Q460N5|PAR14_HUMAN	Poly [ADP-ribose] polymerase 14 OS=Homo sapiens GN=PARP14 PE=1 SV=3	3e-35	1	28.4091	3e-35	352
comp262464_c0_seq1	len=2941	-1.65182	1.41579	0.00252591	0.327959	sp|Q8HZ60|CCHCR_PANTR	Coiled-coil alpha-helical rod protein 1 OS=Pan troglodytes GN=CCHCR1 PE=3 SV=1	3e-49	1	26.1682	3e-49	642
comp250138_c0_seq1	len=2746	2.87707	2.37232	0.00274485	0.347415	sp|P38977|ANTA_HYDVU	Antistasin OS=Hydra vulgaris PE=2 SV=1	1e-17	1	31.1765	1e-17	170
comp242713_c0_seq1	len=801	1.54925	3.17137	0.00276701	0.347832	sp|Q9JLC8|SACS_MOUSE	Sacsin OS=Mus musculus GN=Sacs PE=1 SV=2	2e-09	1	26.6667	2e-09	180
comp254826_c1_seq1	len=1300	-2.88548	0.423743	0.00280695	0.350788	sp|P55006|RDH7_RAT	Retinol dehydrogenase 7 OS=Rattus norvegicus GN=Rdh7 PE=2 SV=1	5e-63	1	40.9722	5e-63	288
comp144913_c0_seq1	len=237	1.762	2.26926	0.00280955	0.350788	sp|P22771|GLRA2_RAT	Glycine receptor subunit alpha-2 OS=Rattus norvegicus GN=Glra2 PE=1 SV=1	3e-08	1	36.7089	3e-08	79
comp253562_c0_seq1	len=910	2.39886	4.10898	0.00292757	0.359838	sp|Q9ES30|C1QT3_MOUSE	Complement C1q tumor necrosis factor-related protein 3 OS=Mus musculus GN=C1qtnf3 PE=2 SV=1	3e-12	1	33.3333	3e-12	132
comp261628_c1_seq3	len=2663	-1.9863	0.296936	0.00301814	0.368513	sp|Q54BM3|MCFG_DICDI	Mitochondrial substrate carrier family protein G OS=Dictyostelium discoideum GN=mcfG PE=2 SV=1	3e-70	1	40.9836	3e-70	305
comp250663_c0_seq1	len=1451	-2.08119	6.71812	0.00309393	0.374576	sp|P24787|NEUV_CHICK	Vasotocin-neurophysin VT OS=Gallus gallus PE=2 SV=1	2e-34	1	50.8333	2e-34	120
comp262221_c0_seq2	len=1221	-2.47737	3.2821	0.00318364	0.378688	sp|P10619|PPGB_HUMAN	Lysosomal protective protein OS=Homo sapiens GN=CTSA PE=1 SV=2	4e-45	1	48.5207	4e-45	169
comp138718_c0_seq1	len=922	-3.05587	2.97056	0.00320498	0.379594	sp|Q8SVJ8|NOG1_ENCCU	Nucleolar GTP-binding protein 1 OS=Encephalitozoon cuniculi (strain GB-M1) GN=NOG1 PE=3 SV=1	4e-65	1	40.5844	4e-65	308
comp257547_c0_seq1	len=803	-2.55258	4.81743	0.00323031	0.381777	sp|Q868Z9|PPN_DROME	Papilin OS=Drosophila melanogaster GN=Ppn PE=1 SV=2	1e-09	1	27.451	1e-09	153
comp175976_c0_seq1	len=450	-1.46625	1.26916	0.00346994	0.40068	sp|P50876|R144A_HUMAN	Probable E3 ubiquitin-protein ligase RNF144A OS=Homo sapiens GN=RNF144A PE=1 SV=2	2e-07	1	37.2881	2e-07	59
comp254499_c0_seq2	len=2003	2.37564	0.502038	0.00349038	0.402201	sp|Q9PU47|PDLI3_CHICK	PDZ and LIM domain protein 3 OS=Gallus gallus GN=PDLIM3 PE=1 SV=1	2e-11	1	46.4789	2e-11	71
comp257395_c0_seq6	len=1076	2.36438	2.31227	0.00355617	0.405558	sp|P09352|SR2A_PHYPO	Spherulin-2A OS=Physarum polycephalum PE=2 SV=1	2e-07	1	38.9831	2e-07	59
comp255249_c1_seq1	len=1928	-1.43407	2.11933	0.00371578	0.418767	sp|C3XR70|ENOPH_BRAFL	Enolase-phosphatase E1 OS=Branchiostoma floridae GN=BRAFLDRAFT_73099 PE=3 SV=1	1e-37	1	33.5907	1e-37	259
comp232232_c0_seq1	len=497	-2.04986	1.35098	0.00376094	0.42195	sp|A1YF12|ZNF16_GORGO	Zinc finger protein 16 OS=Gorilla gorilla gorilla GN=ZNF16 PE=3 SV=1	2e-28	1	55.1724	2e-28	87
comp262034_c0_seq6	len=2492	-2.78859	2.3301	0.00378131	0.422521	sp|Q75WE7|VWA5A_RAT	von Willebrand factor A domain-containing protein 5A OS=Rattus norvegicus GN=Vwa5a PE=2 SV=1	1e-123	1	39.9007	1e-123	604
comp259639_c0_seq4	len=762	2.57614	1.84612	0.00389821	0.429316	sp|P13696|PEBP1_BOVIN	Phosphatidylethanolamine-binding protein 1 OS=Bos taurus GN=PEBP1 PE=1 SV=2	1e-69	1	62.1302	1e-69	169
comp218671_c0_seq1	len=445	1.53706	0.890771	0.0038983	0.429316	sp|Q12852|M3K12_HUMAN	Mitogen-activated protein kinase kinase kinase 12 OS=Homo sapiens GN=MAP3K12 PE=1 SV=2	5e-18	1	32.4841	5e-18	157
comp257593_c0_seq3	len=737	-1.529	2.27053	0.00391163	0.429316	sp|Q9LIG0|Y3136_ARATH	Clavaminate synthase-like protein At3g21360 OS=Arabidopsis thaliana GN=At3g21360 PE=1 SV=1	6e-31	1	35.5556	6e-31	180
comp362347_c0_seq1	len=257	-1.61316	0.597435	0.00421143	0.449688	sp|Q8BFZ8|FA72A_MOUSE	Protein FAM72A OS=Mus musculus GN=Fam72a PE=1 SV=1	2e-11	1	56.25	2e-11	48
comp246709_c0_seq4	len=937	-3.11579	5.15488	0.00429315	0.454377	sp|Q54SF4|Y4797_DICDI	Putative uncharacterized protein DDB_G0282499 OS=Dictyostelium discoideum GN=DDB_G0282499 PE=4 SV=2	3e-13	1	23.1373	3e-13	255
comp145527_c0_seq1	len=236	1.50256	0.789889	0.00441209	0.463069	sp|Q9NZJ4|SACS_HUMAN	Sacsin OS=Homo sapiens GN=SACS PE=1 SV=2	7e-10	1	48.3333	7e-10	60
comp254656_c0_seq2	len=2000	2.29148	2.23731	0.00448452	0.46575	sp|P04572|SCP_PERVT	Sarcoplasmic calcium-binding protein OS=Perinereis vancaurica tetradentata PE=1 SV=1	9e-22	1	33.3333	9e-22	180
comp261518_c1_seq1	len=3532	1.47535	2.71281	0.00451141	0.46575	sp|P35574|GDE_RABIT	Glycogen debranching enzyme OS=Oryctolagus cuniculus GN=AGL PE=1 SV=1	0	1	53.86	0	557
comp258626_c2_seq10	len=2059	2.38163	0.0643842	0.00469622	0.47661	sp|Q5ZLR5|UCRI_CHICK	Cytochrome b-c1 complex subunit Rieske		NA			NA
comp262498_c0_seq16	len=572	-1.57049	1.00854	0.004719	0.477171	sp|Q7LHG5|YI31B_YEAST	Transposon Ty3-I Gag-Pol polyprotein OS=Saccharomyces cerevisiae (strain ATCC 204508 / S288c) GN=TY3B-I PE=3 SV=2	2e-21	1	40.9091	2e-21	110
comp259282_c2_seq3	len=1958	-3.12769	2.91689	0.00474628	0.477241	sp|P31696|AGRIN_CHICK	Agrin OS=Gallus gallus GN=AGRN PE=1 SV=3	4e-22	1	39.0071	4e-22	141
comp242584_c2_seq1	len=914	-1.96514	2.39561	0.00476283	0.477241	sp|Q8CA03|TSCOT_MOUSE	Thymic stromal cotransporter protein OS=Mus musculus GN=Slc46a2 PE=1 SV=2	2e-06	1	29.4118	2e-06	85
comp253301_c0_seq1	len=1789	1.40951	7.54722	0.00479279	0.479374	sp|Q00649|HSPB1_CHICK	Heat shock protein beta-1 OS=Gallus gallus GN=HSPB1 PE=2 SV=1	4e-14	1	34.4828	4e-14	116
comp261315_c0_seq2	len=4568	1.3409	1.89711	0.00500377	0.49034	sp|Q9VC61|CRERF_DROME	Protein CREBRF homolog OS=Drosophila melanogaster GN=CG13624 PE=2 SV=2	2e-47	1	47.907	2e-47	215
comp261555_c1_seq8	len=2492	-1.93043	1.56163	0.00501154	0.49034	sp|P34528|YM67_CAEEL	Putative serine protease K12H4,7 OS=Caenorhabditis elegans GN=K12H4,7 PE=3 SV=2	4e-12	1	47.1264	4e-12	87
comp256086_c0_seq3	len=2654	2.15658	6.27558	0.00511604	0.495575	sp|Q03185|TS11_GIAIN	Major surface trophozoite antigen 11 OS=Giardia intestinalis GN=TSP11 PE=3 SV=1	1e-24	1	24.3011	1e-24	465
comp262487_c1_seq5	len=2429	-1.50778	2.85356	0.00522006	0.504767	sp|P47990|XDH_CHICK	Xanthine dehydrogenase/oxidase OS=Gallus gallus GN=XDH PE=1 SV=1	0	1	50.2177	0	689
comp255099_c1_seq3	len=787	-1.64809	1.2211	0.00534892	0.510247	sp|Q5XIU9|PGRC2_RAT	Membrane-associated progesterone receptor component 2 OS=Rattus norvegicus GN=Pgrmc2 PE=1 SV=1	8e-27	1	57.4468	8e-27	94
comp133940_c0_seq1	len=307	-1.70404	0.396322	0.00535263	0.510247	sp|Q8R420|ABCA3_MOUSE	ATP-binding cassette sub-family A member 3 OS=Mus musculus GN=Abca3 PE=2 SV=3	2e-17	1	34.6939	2e-17	98
comp258884_c0_seq2	len=1735	-2.5821	1.08521	0.00544688	0.51765	sp|Q2KHZ9|GCDH_BOVIN	Glutaryl-CoA dehydrogenase		NA			NA
comp237888_c0_seq1	len=938	-1.44189	2.87107	0.0055387	0.521893	sp|P51643|ARF1_XENLA	ADP-ribosylation factor 1 OS=Xenopus laevis GN=arf1 PE=2 SV=2	1e-82	1	68.5083	1e-82	181
comp216657_c0_seq1	len=1196	1.27948	9.07081	0.00559078	0.525904	sp|Q05557|CRYAB_ANAPL	Alpha-crystallin B chain OS=Anas platyrhynchos GN=CRYAB PE=2 SV=1	1e-37	1	43.956	1e-37	182
comp254264_c1_seq1	len=270	-1.31863	0.303562	0.00577576	0.537817	sp|Q03936|ZNF92_HUMAN	Zinc finger protein 92 OS=Homo sapiens GN=ZNF92 PE=2 SV=2	3e-20	1	44.9438	3e-20	89
comp156204_c0_seq1	len=269	1.73858	6.48932	0.00600379	0.550705	sp|P24733|MYS_ARGIR	Myosin heavy chain		NA			NA
comp260903_c4_seq4	len=2076	1.85403	2.36458	0.00616649	0.561902	sp|C0K3N4|VEGFA_AGKPI	Vascular endothelial growth factor A OS=Agkistrodon piscivorus piscivorus PE=2 SV=1	3e-12	1	28.7582	3e-12	153
comp230506_c0_seq2	len=1381	-2.4646	0.763001	0.00631152	0.570651	sp|Q8HXW6|PPT1_MACFA	Palmitoyl-protein thioesterase 1 OS=Macaca fascicularis GN=PPT1 PE=2 SV=1	1e-125	1	63.2353	1e-125	272
comp217519_c0_seq2	len=846	1.92998	2.96449	0.00631409	0.570651	sp|Q9WYX8|Y508_THEMA	Uncharacterized protein TM_0508 OS=Thermotoga maritima (strain ATCC 43589 / MSB8 / DSM 3109 / JCM 10099) GN=TM_0508 PE=4 SV=1	2e-17	1	32.4022	2e-17	179
comp262159_c0_seq6	len=3523	-1.90791	0.0469345	0.00638347	0.575042	sp|Q13627|DYR1A_HUMAN	Dual specificity tyrosine-phosphorylation-regulated kinase 1A OS=Homo sapiens GN=DYRK1A PE=1 SV=2	0	1	71.9715	0	421
comp262520_c1_seq5	len=6283	1.40732	0.90623	0.00642955	0.577313	sp|O42414|NFASC_CHICK	Neurofascin OS=Gallus gallus GN=NFASC PE=1 SV=1	5e-38	1	25.9124	5e-38	548
comp216944_c0_seq1	len=418	-1.41155	2.1052	0.00645355	0.577913	sp|Q8TER0|SNED1_HUMAN	Sushi		NA			NA
comp255444_c0_seq1	len=1220	-1.50318	4.08432	0.00645713	0.577913	sp|Q8N2E2|VWDE_HUMAN	von Willebrand factor D and EGF domain-containing protein OS=Homo sapiens GN=VWDE PE=2 SV=4	5e-21	1	27.5862	5e-21	203
comp256494_c1_seq1	len=1679	-2.20055	4.47459	0.00649072	0.579405	sp|O93308|SMC1A_XENLA	Structural maintenance of chromosomes protein 1A OS=Xenopus laevis GN=smc1a PE=1 SV=1	2e-71	1	35.3659	2e-71	410
comp234874_c1_seq1	len=297	1.3587	0.910492	0.00663086	0.583743	sp|Q9H8W5|TRI45_HUMAN	Tripartite motif-containing protein 45 OS=Homo sapiens GN=TRIM45 PE=1 SV=2	2e-06	1	39.2157	2e-06	51
comp254481_c4_seq1	len=1509	-2.36838	2.92429	0.00667981	0.585526	sp|Q7RTY7|OVCH1_HUMAN	Ovochymase-1 OS=Homo sapiens GN=OVCH1 PE=2 SV=2	2e-63	1	35.3562	2e-63	379
comp244020_c0_seq1	len=323	-1.33973	0.733432	0.00671236	0.58613	sp|A6H687|SAC31_MOUSE	SAC3 domain-containing protein 1 OS=Mus musculus GN=Sac3d1 PE=1 SV=1	3e-16	1	43.5644	3e-16	101
comp248614_c0_seq1	len=3023	-1.27044	4.06639	0.00672548	0.58613	sp|Q8WWK9|CKAP2_HUMAN	Cytoskeleton-associated protein 2 OS=Homo sapiens GN=CKAP2 PE=1 SV=1	2e-08	1	20.765	2e-08	549
comp378304_c0_seq1	len=315	-1.50333	0.814513	0.00685835	0.592722	sp|P21329|RTJK_DROFU	RNA-directed DNA polymerase from mobile element jockey OS=Drosophila funebris GN=jockey\pol PE=1 SV=1	8e-06	1	28.0374	8e-06	107
comp258417_c0_seq1	len=1553	-1.34075	3.37041	0.00723629	0.613932	sp|A0JML8|DALD3_DANRE	DALR anticodon-binding domain-containing protein 3 OS=Danio rerio GN=dalrd3 PE=2 SV=1	1e-47	1	39.0977	1e-47	266
comp246287_c0_seq1	len=497	1.28055	0.800493	0.00732487	0.615723	sp|Q24372|LACH_DROME	Lachesin OS=Drosophila melanogaster GN=Lac PE=2 SV=2	4e-15	1	32.0513	4e-15	156
comp262159_c0_seq1	len=3492	1.52876	0.0280831	0.0074106	0.619446	sp|Q13627|DYR1A_HUMAN	Dual specificity tyrosine-phosphorylation-regulated kinase 1A OS=Homo sapiens GN=DYRK1A PE=1 SV=2	0	1	73.3831	0	402
comp256134_c0_seq1	len=1540	1.64463	0.257961	0.00754774	0.623094	sp|Q7KZN9|COX15_HUMAN	Cytochrome c oxidase assembly protein COX15 homolog OS=Homo sapiens GN=COX15 PE=1 SV=1	1e-143	1	57.971	1e-143	345
comp229551_c0_seq1	len=668	-1.57178	1.84359	0.00756048	0.623216	sp|Q2QI47|USH2A_MOUSE	Usherin OS=Mus musculus GN=Ush2A PE=1 SV=2	6e-12	1	30.6977	6e-12	215
comp260562_c2_seq1	len=1844	1.59185	3.59088	0.00781705	0.633849	sp|Q8C8R3|ANK2_MOUSE	Ankyrin-2 OS=Mus musculus GN=Ank2 PE=1 SV=2	1e-168	1	46.0163	1e-168	615
comp227806_c0_seq1	len=576	-1.94862	2.14512	0.00782699	0.633849	sp|P52889|LHX5_DANRE	LIM/homeobox protein Lhx5 OS=Danio rerio GN=lhx5 PE=2 SV=1	5e-44	1	56.5217	5e-44	161
comp203066_c0_seq1	len=348	-1.74991	1.18961	0.00790237	0.637185	sp|Q96JS3|PGBD1_HUMAN	PiggyBac transposable element-derived protein 1 OS=Homo sapiens GN=PGBD1 PE=1 SV=1	9e-21	1	40.678	9e-21	118
comp258205_c2_seq1	len=332	-1.97358	1.32913	0.007944	0.639579	sp|Q0V9W6|BTBD6_XENTR	BTB/POZ domain-containing protein 6 OS=Xenopus tropicalis GN=btbd6 PE=2 SV=2	6e-10	1	35.4545	6e-10	110
comp242713_c1_seq1	len=576	1.37491	2.58546	0.00800525	0.640828	sp|Q9NZJ4|SACS_HUMAN	Sacsin OS=Homo sapiens GN=SACS PE=1 SV=2	1e-15	1	38.3721	1e-15	86
comp238398_c0_seq6	len=537	1.62934	1.36644	0.00821419	0.647529	sp|P04572|SCP_PERVT	Sarcoplasmic calcium-binding protein OS=Perinereis vancaurica tetradentata PE=1 SV=1	2e-11	1	26.8966	2e-11	145
comp259843_c4_seq1	len=2420	-1.67285	0.180911	0.00845903	0.658055	sp|Q9QZC4|PCY1B_RAT	Choline-phosphate cytidylyltransferase B OS=Rattus norvegicus GN=Pcyt1b PE=2 SV=1	1e-105	1	52.3392	1e-105	342
comp260621_c1_seq1	len=2092	1.32595	3.73164	0.00849981	0.658877	sp|P35316|ATC_ARTSF	Calcium-transporting ATPase sarcoplasmic/endoplasmic reticulum type OS=Artemia franciscana PE=2 SV=1	6e-98	1	70.4348	6e-98	230
comp253941_c2_seq1	len=1292	1.64794	2.07436	0.00850533	0.658877	sp|P39429|TRAF2_MOUSE	TNF receptor-associated factor 2 OS=Mus musculus GN=Traf2 PE=1 SV=1	4e-61	1	32.8358	4e-61	402
comp257518_c0_seq3	len=1526	2.63444	0.336771	0.00857549	0.661864	sp|Q5UR67|YR617_MIMIV	Uncharacterized protein R617 OS=Acanthamoeba polyphaga mimivirus GN=MIMI_R617 PE=4 SV=1	2e-17	1	34.8993	2e-17	149
comp222753_c0_seq1	len=554	-1.65436	1.67657	0.00857978	0.661864	sp|B6MFW3|HOOK_BRAFL	Protein Hook homolog OS=Branchiostoma floridae GN=BRAFLDRAFT_281537 PE=3 SV=1	1e-13	1	28.2828	1e-13	198
comp285942_c0_seq1	len=227	-1.41175	1.66173	0.00876462	0.667741	sp|Q70E20|SNED1_MOUSE	Sushi		NA			NA
comp221943_c0_seq1	len=471	1.7314	1.93212	0.0089251	0.6753	sp|P20334|TNR9_MOUSE	Tumor necrosis factor receptor superfamily member 9 OS=Mus musculus GN=Tnfrsf9 PE=1 SV=1	6e-07	1	32.3077	6e-07	65
comp261223_c0_seq3	len=2920	1.80552	0.404119	0.00908785	0.676525	sp|Q24799|MYPH_ECHGR	Myophilin OS=Echinococcus granulosus PE=2 SV=1	8e-30	1	39.5122	8e-30	205
comp172486_c0_seq1	len=968	1.19585	2.7726	0.00932076	0.686472	sp|Q0P5B3|RBTN1_BOVIN	Rhombotin-1 OS=Bos taurus GN=LMO1 PE=2 SV=1	2e-71	1	76.8595	2e-71	121
comp268448_c0_seq1	len=886	1.88357	4.63679	0.00938704	0.688603	sp|Q08830|FGL1_HUMAN	Fibrinogen-like protein 1 OS=Homo sapiens GN=FGL1 PE=1 SV=3	5e-41	1	42.6316	5e-41	190
comp256429_c0_seq1	len=4082	-1.25287	0.732876	0.00954719	0.695737	sp|Q01705|NOTC1_MOUSE	Neurogenic locus notch homolog protein 1 OS=Mus musculus GN=Notch1 PE=1 SV=3	8e-23	1	45.5285	8e-23	123
comp323306_c0_seq1	len=264	-1.30264	1.20537	0.00985341	0.705851	sp|Q96JB1|DYH8_HUMAN	Dynein heavy chain 8		NA			NA
comp252667_c0_seq2	len=1213	-2.62725	1.8728	0.00988022	0.706052	sp|Q69P80|COP51_ORYSJ	Copper transporter 5,1 OS=Oryza sativa subsp, japonica GN=COPT5,1 PE=2 SV=1	8e-18	1	33.9744	8e-18	156
comp259977_c0_seq1	len=1587	-1.32798	4.63724	0.0100806	0.714195	sp|Q9LIG0|Y3136_ARATH	Clavaminate synthase-like protein At3g21360 OS=Arabidopsis thaliana GN=At3g21360 PE=1 SV=1	1e-66	1	38.75	1e-66	320
comp234874_c0_seq1	len=405	1.4724	1.26563	0.0101204	0.714901	sp|E1BD59|TRI56_BOVIN	E3 ubiquitin-protein ligase TRIM56 OS=Bos taurus GN=TRIM56 PE=3 SV=1	4e-12	1	28.8889	4e-12	135
comp246387_c0_seq1	len=722	-1.7915	2.59993	0.0101423	0.71554	sp|Q8CG72|ARHL2_MOUSE	Poly(ADP-ribose) glycohydrolase ARH3 OS=Mus musculus GN=Adprhl2 PE=1 SV=1	4e-19	1	29.918	4e-19	244
comp250240_c0_seq1	len=1098	-1.65398	2.32056	0.0101606	0.715915	sp|Q9JLB4|CUBN_MOUSE	Cubilin OS=Mus musculus GN=Cubn PE=1 SV=3	3e-22	1	27.8481	3e-22	316
comp262366_c0_seq1	len=5418	-3.92938	10.9667	0.0102453	0.719136	sp|Q8TER0|SNED1_HUMAN	Sushi		NA			NA
comp254430_c0_seq1	len=2163	-1.3633	1.14019	0.0103165	0.722301	sp|Q28GV1|CNDH2_XENTR	Condensin-2 complex subunit H2 OS=Xenopus tropicalis GN=ncaph2 PE=2 SV=1	2e-85	1	32.967	2e-85	637
comp256308_c0_seq1	len=569	-1.4644	4.07902	0.0104586	0.728066	sp|Q9D3D0|TTPAL_MOUSE	Alpha-tocopherol transfer protein-like OS=Mus musculus GN=Ttpal PE=2 SV=3	7e-12	1	31.0526	7e-12	190
comp254126_c0_seq4	len=372	1.27692	1.5085	0.01056	0.728665	sp|Q8C525|M21D2_MOUSE	Protein MB21D2 OS=Mus musculus GN=Mb21d2 PE=1 SV=1	4e-06	1	33.3333	4e-06	60
comp262202_c0_seq16	len=332	1.33438	0.826092	0.0105919	0.728665	sp|O70247|SC5A6_RAT	Sodium-dependent multivitamin transporter OS=Rattus norvegicus GN=Slc5a6 PE=2 SV=1	5e-08	1	46.4286	5e-08	56
comp261140_c0_seq1	len=3048	1.1859	0.921065	0.0107467	0.733839	sp|Q9Z2Z9|GFPT2_MOUSE	Glutamine--fructose-6-phosphate aminotransferase [isomerizing] 2 OS=Mus musculus GN=Gfpt2 PE=2 SV=3	0	1	66.9054	0	698
comp256890_c1_seq14	len=1213	-1.34619	4.04065	0.0107612	0.733923	sp|O08523|TECTA_MOUSE	Alpha-tectorin OS=Mus musculus GN=Tecta PE=1 SV=2	8e-29	1	54.5455	8e-29	99
comp260093_c2_seq1	len=292	-1.87018	1.67649	0.0108036	0.735434	sp|Q99PW6|MMP24_RAT	Matrix metalloproteinase-24 OS=Rattus norvegicus GN=Mmp24 PE=2 SV=1	2e-08	1	37.3494	2e-08	83
comp250447_c2_seq1	len=971	-1.19757	3.37176	0.0108099	0.735434	sp|Q6R5N8|TLR13_MOUSE	Toll-like receptor 13 OS=Mus musculus GN=Tlr13 PE=1 SV=1	6e-11	1	36.9048	6e-11	84
comp237394_c1_seq1	len=557	-1.30881	1.2056	0.0109058	0.737419	sp|Q0P4P2|FBCD1_XENTR	Fibrinogen C domain-containing protein 1 OS=Xenopus tropicalis GN=fibcd1 PE=2 SV=1	8e-26	1	55.3191	8e-26	94
comp260101_c1_seq1	len=1087	1.37691	4.46528	0.0111086	0.745667	sp|Q91147|FGFR2_NOTVI	Fibroblast growth factor receptor 2 OS=Notophthalmus viridescens GN=FGFR2 PE=2 SV=1	4e-24	1	35.8974	4e-24	156
comp216489_c0_seq1	len=789	1.29335	3.2629	0.0111668	0.747754	sp|O23184|CML19_ARATH	Calcium-binding protein CML19 OS=Arabidopsis thaliana GN=CML19 PE=2 SV=1	1e-07	1	34.4828	1e-07	87
comp262487_c1_seq4	len=448	-1.25281	2.66974	0.0112499	0.750517	sp|P47990|XDH_CHICK	Xanthine dehydrogenase/oxidase OS=Gallus gallus GN=XDH PE=1 SV=1	3e-47	1	55.4054	3e-47	148
comp249318_c1_seq1	len=322	-1.36063	0.323912	0.0112623	0.750517	sp|Q4PJW3|CP51A_BOVIN	Lanosterol 14-alpha demethylase OS=Bos taurus GN=CYP51A1 PE=2 SV=1	4e-48	1	72.381	4e-48	105
comp259426_c7_seq1	len=389	-1.24975	0.947857	0.0117061	0.769687	sp|Q01484|ANK2_HUMAN	Ankyrin-2 OS=Homo sapiens GN=ANK2 PE=1 SV=4	2e-14	1	40.367	2e-14	109
comp258791_c0_seq2	len=3750	1.43646	0.814482	0.0120451	0.780124	sp|O17732|PYC1_CAEEL	Pyruvate carboxylase 1 OS=Caenorhabditis elegans GN=pyc-1 PE=1 SV=1	0	1	62.9353	0	804
comp241984_c0_seq1	len=855	-1.56126	1.60363	0.0121476	0.780505	sp|Q0VAA2|CN16B_HUMAN	Uncharacterized protein C14orf166B OS=Homo sapiens GN=C14orf166B PE=2 SV=2	7e-11	1	33.8983	7e-11	118
comp262560_c0_seq11	len=2848	1.1318	4.9275	0.0121942	0.781546	sp|P98164|LRP2_HUMAN	Low-density lipoprotein receptor-related protein 2 OS=Homo sapiens GN=LRP2 PE=1 SV=3	0	1	38.3442	0	918
comp247317_c0_seq1	len=1791	1.52765	7.34382	0.0122772	0.785046	sp|P28798|GRN_MOUSE	Granulins OS=Mus musculus GN=Grn PE=1 SV=2	7e-34	1	37.7246	7e-34	167
comp254432_c3_seq8	len=1243	1.45717	1.02709	0.012384	0.787402	sp|Q9CZ49|KLH35_MOUSE	Kelch-like protein 35 OS=Mus musculus GN=Klhl35 PE=2 SV=2	3e-09	1	23.7668	3e-09	223
comp199160_c0_seq1	len=259	-1.32318	0.726877	0.0123852	0.787402	sp|Q4G0P3|HYDIN_HUMAN	Hydrocephalus-inducing protein homolog OS=Homo sapiens GN=HYDIN PE=1 SV=3	1e-15	1	37.6471	1e-15	85
comp196911_c2_seq1	len=445	-1.24536	0.208951	0.0124398	0.789256	sp|Q9MYS6|KCNQ1_RABIT	Potassium voltage-gated channel subfamily KQT member 1 (Fragment) OS=Oryctolagus cuniculus GN=KCNQ1 PE=2 SV=2	3e-88	1	88.7324	3e-88	142
comp267995_c0_seq1	len=329	1.90786	2.89955	0.0124429	0.789256	sp|Q95LU3|FBCD1_MACFA	Fibrinogen C domain-containing protein 1 OS=Macaca fascicularis GN=FIBCD1 PE=2 SV=1	2e-20	1	74.5098	2e-20	51
comp241995_c0_seq1	len=1108	-1.88267	1.71637	0.0126514	0.797066	sp|Q25464|FP2_MYTGA	Adhesive plaque matrix protein 2 OS=Mytilus galloprovincialis GN=FP2 PE=2 SV=1	1e-15	1	44.5783	1e-15	83
comp248117_c0_seq2	len=961	2.45919	1.13253	0.0129389	0.803217	sp|Q32P76|SERF1_BOVIN	Small EDRK-rich factor 1 OS=Bos taurus GN=SERF1 PE=3 SV=1	2e-09	1	51.7857	2e-09	56
comp260762_c0_seq1	len=4975	1.55392	2.41682	0.0132265	0.806445	sp|O16025|AOSL_PLEHO	Allene oxide synthase-lipoxygenase protein OS=Plexaura homomalla PE=1 SV=1	1e-111	1	26.7364	1e-111	1051
comp260564_c0_seq1	len=838	1.16101	0.893391	0.0133795	0.807899	sp|Q53LP3|SWAHC_HUMAN	Ankyrin repeat domain-containing protein SOWAHC OS=Homo sapiens GN=SOWAHC PE=1 SV=1	6e-28	1	39.8601	6e-28	143
comp252297_c0_seq1	len=1381	-1.10302	3.52244	0.0135918	0.814437	sp|Q8N0V3|RBFA_HUMAN	Putative ribosome-binding factor A		NA			NA
comp221757_c0_seq1	len=255	1.40213	0.712754	0.0136961	0.81808	sp|P98060|NAS35_CAEEL	Zinc metalloproteinase dpy-31 OS=Caenorhabditis elegans GN=dpy-31 PE=1 SV=2	5e-16	1	43.6782	5e-16	87
comp246103_c3_seq1	len=484	1.29698	1.41587	0.0137323	0.81848	sp|Q3MHH5|CCND3_BOVIN	G1/S-specific cyclin-D3 OS=Bos taurus GN=CCND3 PE=2 SV=1	4e-44	1	45.625	4e-44	160
comp250322_c0_seq1	len=1546	1.14637	3.13514	0.0140431	0.830518	sp|Q96HU8|DIRA2_HUMAN	GTP-binding protein Di-Ras2 OS=Homo sapiens GN=DIRAS2 PE=1 SV=1	1e-106	1	76.3819	1e-106	199
comp244938_c0_seq2	len=617	-1.65415	5.14845	0.0140651	0.830518	sp|P38977|ANTA_HYDVU	Antistasin OS=Hydra vulgaris PE=2 SV=1	7e-06	1	30.2752	7e-06	109
comp259470_c0_seq3	len=662	-1.49901	0.749613	0.0140674	0.830518	sp|Q7M3K2|PELET_DROME	Transposable element P transposase OS=Drosophila melanogaster GN=T PE=1 SV=2	1e-17	1	26.5766	1e-17	222
comp250692_c1_seq5	len=613	-1.45746	1.85022	0.0145709	0.850137	sp|Q8JIS3|DER_CHICK	D-erythrulose reductase OS=Gallus gallus GN=DER PE=1 SV=1	1e-35	1	43.8356	1e-35	146
comp253209_c0_seq1	len=1220	-1.57536	1.97358	0.0147703	0.852802	sp|P97607|JAG2_RAT	Protein jagged-2 (Fragment) OS=Rattus norvegicus GN=Jag2 PE=2 SV=1	1e-17	1	28.125	1e-17	224
comp251040_c0_seq2	len=2958	2.73247	0.232586	0.015308	0.87289	sp|Q6RUV5|RAC1_RAT	Ras-related C3 botulinum toxin substrate 1 OS=Rattus norvegicus GN=Rac1 PE=1 SV=1	1e-112	1	93.1818	1e-112	176
comp216673_c0_seq1	len=762	1.55602	1.38651	0.0157203	0.885082	sp|P54357|MLC2_DROME	Myosin-2 essential light chain OS=Drosophila melanogaster GN=Mlc-c PE=1 SV=1	5e-55	1	59.1837	5e-55	147
comp260312_c3_seq5	len=1400	1.39781	5.34034	0.0157758	0.885862	sp|P16230|SRCH_RABIT	Sarcoplasmic reticulum histidine-rich calcium-binding protein OS=Oryctolagus cuniculus GN=HRC PE=1 SV=1	6e-06	1	20.9738	6e-06	267
comp243127_c4_seq1	len=406	-1.25679	1.18911	0.0158312	0.887171	sp|P23377|FURIN_RAT	Furin OS=Rattus norvegicus GN=Furin PE=1 SV=1	2e-55	1	69.6296	2e-55	135
comp162179_c0_seq1	len=221	1.44881	5.58652	0.0158535	0.887525	sp|P24733|MYS_ARGIR	Myosin heavy chain		NA			NA
comp235607_c2_seq1	len=1051	-1.58155	2.87878	0.0159233	0.889324	sp|P10394|POL4_DROME	Retrovirus-related Pol polyprotein from transposon 412 OS=Drosophila melanogaster GN=POL PE=4 SV=1	2e-41	1	30.03	2e-41	333
comp244469_c0_seq2	len=1429	-1.59966	2.12367	0.0159356	0.889324	sp|Q5BJT2|UBL3_RAT	Ubiquitin-like protein 3 OS=Rattus norvegicus GN=Ubl3 PE=2 SV=1	1e-51	1	67.7966	1e-51	118
comp256388_c0_seq1	len=1500	-1.36108	3.53328	0.0161576	0.892684	sp|Q2VQV9|CECR1_XENLA	Adenosine deaminase CECR1 OS=Xenopus laevis GN=cecr1 PE=1 SV=1	2e-40	1	33.0218	2e-40	321
comp241496_c0_seq1	len=602	-1.2879	1.88969	0.0162691	0.893605	sp|Q5RCN7|MFSD4_PONAB	Major facilitator superfamily domain-containing protein 4 OS=Pongo abelii GN=MFSD4 PE=2 SV=1	3e-18	1	34.6939	3e-18	147
comp235607_c1_seq1	len=987	-1.44865	2.60758	0.0162938	0.894072	sp|P10394|POL4_DROME	Retrovirus-related Pol polyprotein from transposon 412 OS=Drosophila melanogaster GN=POL PE=4 SV=1	3e-36	1	38	3e-36	200
comp259080_c0_seq2	len=4572	2.11454	0.916294	0.0165319	0.898774	sp|Q5R7J9|IF4G2_PONAB	Eukaryotic translation initiation factor 4 gamma 2 OS=Pongo abelii GN=EIF4G2 PE=2 SV=2	1e-110	1	45.0226	1e-110	442
comp234803_c0_seq1	len=250	1.15832	0.800274	0.0165539	0.898774	sp|Q4LDE5|SVEP1_HUMAN	Sushi		NA			NA
comp231703_c0_seq1	len=618	1.89909	1.7346	0.016577	0.898774	sp|P45883|ACBP_PELRI	Acyl-CoA-binding protein homolog OS=Pelophylax ridibundus PE=1 SV=2	3e-34	1	67.4699	3e-34	83
comp252290_c0_seq1	len=949	-1.51147	2.5174	0.0166774	0.899944	sp|A6NNF4|ZN726_HUMAN	Zinc finger protein 726 OS=Homo sapiens GN=ZNF726 PE=2 SV=3	2e-60	1	37.5839	2e-60	298
comp268683_c0_seq1	len=2594	-1.5726	4.7068	0.0168493	0.903051	sp|D3YYI7|RN217_MOUSE	Probable E3 ubiquitin-protein ligase RNF217 OS=Mus musculus GN=Rnf217 PE=3 SV=2	1e-10	1	24.2718	1e-10	206
comp223254_c0_seq1	len=1644	-1.68273	2.3448	0.016966	0.907201	sp|P19137|LAMA1_MOUSE	Laminin subunit alpha-1 OS=Mus musculus GN=Lama1 PE=1 SV=1	9e-55	1	33.4302	9e-55	344
comp250937_c1_seq3	len=1812	-2.20823	1.55855	0.0170677	0.911226	sp|A2AAJ9|OBSCN_MOUSE	Obscurin OS=Mus musculus GN=Obscn PE=2 SV=2	1e-14	1	21.4765	1e-14	447
comp261542_c1_seq4	len=2163	-1.32981	0.192979	0.017139	0.911512	sp|Q04446|GLGB_HUMAN	1		NA			NA
comp251188_c0_seq1	len=898	-1.54288	2.39656	0.0173408	0.915209	sp|Q9V4M2|WECH_DROME	Protein wech OS=Drosophila melanogaster GN=wech PE=1 SV=2	2e-07	1	26.9737	2e-07	152
comp251173_c2_seq1	len=518	-1.80059	0.865639	0.0173591	0.915302	sp|O75417|DPOLQ_HUMAN	DNA polymerase theta OS=Homo sapiens GN=POLQ PE=1 SV=2	2e-16	1	51.3889	2e-16	72
comp253246_c0_seq1	len=1230	1.08199	3.38531	0.0174679	0.91684	sp|Q75N90|FBN3_HUMAN	Fibrillin-3 OS=Homo sapiens GN=FBN3 PE=2 SV=3	1e-12	1	43.0233	1e-12	86
comp180560_c0_seq1	len=209	-1.30342	0.952665	0.0175493	0.920064	sp|Q8BW94|DYH3_MOUSE	Dynein heavy chain 3		NA			NA
comp252804_c4_seq1	len=205	-1.15449	0.553355	0.0177839	0.927095	sp|Q91ZA3|PCCA_MOUSE	Propionyl-CoA carboxylase alpha chain		NA			NA
comp222524_c0_seq1	len=255	-1.32508	0.599695	0.017819	0.92805	sp|P30430|FUR1C_DROME	Furin-like protease 1		NA			NA
comp262545_c0_seq5	len=2115	-1.14167	0.720127	0.0178812	0.929535	sp|O70523|FXR1_CRIGR	Fragile X mental retardation syndrome-related protein 1 OS=Cricetulus griseus GN=FXR1 PE=2 SV=1	1e-105	1	44.4444	1e-105	414
comp249782_c0_seq1	len=1611	1.23965	1.8243	0.0180016	0.934918	sp|Q28709|CD63_RABIT	CD63 antigen OS=Oryctolagus cuniculus GN=CD63 PE=2 SV=2	7e-17	1	27.0142	7e-17	211
comp197983_c0_seq1	len=936	1.09148	1.60481	0.0182498	0.944261	sp|O94827|PKHG5_HUMAN	Pleckstrin homology domain-containing family G member 5 OS=Homo sapiens GN=PLEKHG5 PE=2 SV=3	4e-69	1	38.6293	4e-69	321
comp230828_c0_seq1	len=1075	-2.84042	6.88817	0.0183126	0.945739	sp|P41962|SODC_BRUPA	Superoxide dismutase [Cu-Zn] OS=Brugia pahangi GN=SODC PE=2 SV=1	2e-48	1	55.3957	2e-48	139
comp260104_c1_seq5	len=834	-2.42594	3.46048	0.0187881	0.957458	sp|Q9H0C5|BTBD1_HUMAN	BTB/POZ domain-containing protein 1 OS=Homo sapiens GN=BTBD1 PE=1 SV=1	1e-06	1	29.0323	1e-06	155
comp241175_c0_seq1	len=664	-1.84331	3.89202	0.0187991	0.957458	sp|Q99NI3|GT2D2_MOUSE	General transcription factor II-I repeat domain-containing protein 2 OS=Mus musculus GN=Gtf2ird2 PE=2 SV=1	5e-08	1	37.3333	5e-08	75
comp211867_c0_seq1	len=1434	2.4525	1.46225	0.0188607	0.95959	sp|A4IIW0|MB212_XENTR	Protein mab-21-like 2 OS=Xenopus tropicalis GN=mab21l2 PE=2 SV=1	3e-11	1	39.6396	3e-11	111
comp251408_c0_seq3	len=1424	1.35933	5.48634	0.01903	0.963892	sp|O88572|LRP6_MOUSE	Low-density lipoprotein receptor-related protein 6 OS=Mus musculus GN=Lrp6 PE=1 SV=1	2e-34	1	26.3923	2e-34	413
comp196311_c0_seq1	len=1125	1.09812	5.02702	0.0192774	0.971971	sp|P22222|E13B_CELCE	Glucan endo-1		NA			NA
comp256522_c0_seq2	len=723	1.39777	1.39941	0.0193874	0.974852	sp|P00591|LIPP_PIG	Pancreatic triacylglycerol lipase OS=Sus scrofa GN=PNLIP PE=1 SV=2	2e-15	1	32.0513	2e-15	156
comp255926_c2_seq2	len=485	-1.35788	1.68707	0.0194259	0.975871	sp|Q53GL7|PAR10_HUMAN	Poly [ADP-ribose] polymerase 10 OS=Homo sapiens GN=PARP10 PE=1 SV=2	2e-07	1	46.4286	2e-07	56
comp261195_c1_seq5	len=1288	1.21023	0.12747	0.0196079	0.983258	sp|Q5U305|ERD22_RAT	ER lumen protein retaining receptor 2 OS=Rattus norvegicus GN=Kdelr2 PE=2 SV=1	1e-115	1	77.8302	1e-115	212
comp168719_c0_seq1	len=325	1.38066	6.40351	0.0199065	0.988771	sp|P24733|MYS_ARGIR	Myosin heavy chain		NA			NA
comp255933_c0_seq1	len=2560	-1.24965	4.38393	0.0199142	0.988771	sp|A8WGT1|C25L2_DANRE	Cholesterol 25-hydroxylase-like protein 2 OS=Danio rerio GN=ch25hl2 PE=2 SV=1	1e-60	1	40.8907	1e-60	247
comp260114_c8_seq1	len=3357	1.32035	2.54255	0.019922	0.988771	sp|Q7T3C6|CPSF5_DANRE	Cleavage and polyadenylation specificity factor subunit 5 OS=Danio rerio GN=cpsf5 PE=2 SV=1	1e-111	1	75.8929	1e-111	224
comp205792_c0_seq1	len=335	1.30106	1.35602	0.0200308	0.988771	sp|O95198|KLHL2_HUMAN	Kelch-like protein 2 OS=Homo sapiens GN=KLHL2 PE=1 SV=2	2e-28	1	56.3218	2e-28	87
comp217688_c0_seq1	len=632	1.28657	2.81477	0.0201051	0.988771	sp|O88533|DDC_MOUSE	Aromatic-L-amino-acid decarboxylase OS=Mus musculus GN=Ddc PE=2 SV=1	4e-72	1	55.9585	4e-72	193
comp236729_c0_seq1	len=849	1.238	2.07984	0.0203004	0.994541	sp|P58681|TLR7_MOUSE	Toll-like receptor 7 OS=Mus musculus GN=Tlr7 PE=1 SV=1	2e-06	1	31.3131	2e-06	99
comp246692_c2_seq1	len=1055	-1.38397	2.44942	0.0204724	0.994842	sp|Q68DL7|CR063_HUMAN	Uncharacterized protein C18orf63 OS=Homo sapiens GN=C18orf63 PE=2 SV=2	2e-31	1	28.0899	2e-31	356
comp262666_c0_seq1	len=217	1.37226	5.70666	0.0206948	1	sp|P24733|MYS_ARGIR	Myosin heavy chain		NA			NA
comp240402_c0_seq1	len=1022	-1.56878	2.48712	0.0209123	1	sp|Q5R4D6|LEO1_PONAB	RNA polymerase-associated protein LEO1 OS=Pongo abelii GN=LEO1 PE=2 SV=1	2e-09	1	22.0339	2e-09	236
comp234851_c0_seq1	len=486	-1.52674	2.35061	0.0211906	1	sp|Q8N328|PGBD3_HUMAN	PiggyBac transposable element-derived protein 3 OS=Homo sapiens GN=PGBD3 PE=2 SV=3	2e-07	1	30.303	2e-07	99
comp262560_c0_seq14	len=539	1.03296	3.67866	0.0212805	1	sp|A2ARV4|LRP2_MOUSE	Low-density lipoprotein receptor-related protein 2 OS=Mus musculus GN=Lrp2 PE=1 SV=1	9e-12	1	32.3529	9e-12	102
comp218000_c0_seq1	len=691	1.39743	1.98636	0.0216274	1	sp|Q7TSU7|KIRR2_MOUSE	Kin of IRRE-like protein 2 OS=Mus musculus GN=Kirrel2 PE=1 SV=1	3e-08	1	26.1438	3e-08	153
comp255632_c0_seq1	len=2091	-1.19294	4.67756	0.0216528	1	sp|B2RXR6|ANR44_MOUSE	Serine/threonine-protein phosphatase 6 regulatory ankyrin repeat subunit B OS=Mus musculus GN=Ankrd44 PE=2 SV=1	1e-32	1	31.6176	1e-32	272
comp242341_c0_seq1	len=951	1.56466	4.80048	0.0217499	1	sp|Q05707|COEA1_HUMAN	Collagen alpha-1(XIV) chain OS=Homo sapiens GN=COL14A1 PE=1 SV=3	3e-13	1	29.7872	3e-13	188
comp233841_c0_seq1	len=430	-1.04988	1.00356	0.02189	1	sp|P0CI65|NPHP3_DANRE	Nephrocystin-3 OS=Danio rerio GN=nphp3 PE=3 SV=1	3e-36	1	43.2624	3e-36	141
comp252708_c0_seq1	len=1818	-1.34281	3.62868	0.0219887	1	sp|Q7K237|C1GLT_DROME	Glycoprotein-N-acetylgalactosamine 3-beta-galactosyltransferase 1 OS=Drosophila melanogaster GN=C1GalTA PE=2 SV=1	9e-65	1	42.3664	9e-65	262
comp248552_c1_seq1	len=787	-1.0869	2.06525	0.0220069	1	sp|Q498E7|SMAL1_XENLA	SWI/SNF-related matrix-associated actin-dependent regulator of chromatin subfamily A-like protein 1 OS=Xenopus laevis GN=smarcal1 PE=2 SV=1	4e-83	1	52.3256	4e-83	258
comp236034_c0_seq1	len=604	-1.50873	2.059	0.0221679	1	sp|P20825|POL2_DROME	Retrovirus-related Pol polyprotein from transposon 297 OS=Drosophila melanogaster GN=pol PE=4 SV=1	8e-39	1	40.099	8e-39	202
comp253718_c1_seq7	len=1103	1.10959	2.62113	0.0222502	1	sp|O70244|CUBN_RAT	Cubilin OS=Rattus norvegicus GN=Cubn PE=1 SV=2	1e-18	1	29.7398	1e-18	269
comp256366_c0_seq1	len=1880	1.64782	1.45254	0.0222954	1	sp|Q23985|DTX_DROME	Protein deltex OS=Drosophila melanogaster GN=dx PE=1 SV=2	5e-11	1	35.7724	5e-11	123
comp262517_c0_seq2	len=6947	1.23788	1.72607	0.0228391	1	sp|O08746|MATN2_MOUSE	Matrilin-2 OS=Mus musculus GN=Matn2 PE=2 SV=2	1e-25	1	28.6184	1e-25	304
comp247215_c0_seq1	len=620	-1.52755	1.11155	0.0229543	1	sp|Q8IYE0|CC146_HUMAN	Coiled-coil domain-containing protein 146 OS=Homo sapiens GN=CCDC146 PE=2 SV=2	1e-12	1	31.25	1e-12	160
comp262247_c0_seq12	len=1504	-1.62313	3.06658	0.0229561	1	sp|P05689|CATZ_BOVIN	Cathepsin Z OS=Bos taurus GN=CTSZ PE=2 SV=2	1e-139	1	68.7273	1e-139	275
comp253279_c0_seq1	len=1409	-1.5148	3.67707	0.0232573	1	sp|Q3KPV7|PI15_XENLA	Peptidase inhibitor 15 OS=Xenopus laevis GN=pi15 PE=2 SV=1	5e-30	1	33.3333	5e-30	237
comp251763_c1_seq3	len=1659	1.23624	1.4675	0.0235268	1	sp|Q9H0R3|TM222_HUMAN	Transmembrane protein 222 OS=Homo sapiens GN=TMEM222 PE=2 SV=2	4e-73	1	69.5946	4e-73	148
comp260781_c0_seq1	len=2679	-1.43278	5.17346	0.0236123	1	sp|Q4VM07|VM3VB_MACLB	Zinc metalloproteinase-disintegrin VLAIP-B OS=Macrovipera lebetina PE=1 SV=1	6e-39	1	29.7235	6e-39	434
comp260562_c0_seq1	len=667	1.45865	1.93289	0.0237446	1	sp|Q01484|ANK2_HUMAN	Ankyrin-2 OS=Homo sapiens GN=ANK2 PE=1 SV=4	8e-94	1	67.5676	8e-94	222
comp259276_c0_seq1	len=2032	-1.98673	4.23603	0.0238685	1	sp|Q5D1D6|GBP1_CHLAE	Interferon-induced guanylate-binding protein 1 OS=Chlorocebus aethiops GN=GBP1 PE=2 SV=1	1e-116	1	37.2514	1e-116	553
comp259500_c0_seq1	len=2829	-1.10389	2.03999	0.024035	1	sp|P58108|AAKG1_BOVIN	5'-AMP-activated protein kinase subunit gamma-1 OS=Bos taurus GN=PRKAG1 PE=2 SV=2	7e-80	1	45.4839	7e-80	310
comp262247_c0_seq9	len=1315	2.20171	3.40629	0.0241443	1	sp|P05689|CATZ_BOVIN	Cathepsin Z OS=Bos taurus GN=CTSZ PE=2 SV=2	1e-140	1	69.0909	1e-140	275
comp518324_c0_seq1	len=415	-1.27095	0.588245	0.024174	1	sp|O05871|PKND_MYCTU	Serine/threonine-protein kinase PknD OS=Mycobacterium tuberculosis GN=pknD PE=1 SV=1	3e-06	1	31.0345	3e-06	116
comp254423_c0_seq1	len=754	-1.11906	0.841025	0.024185	1	sp|Q52KN7|CPE1B_XENLA	Cytoplasmic polyadenylation element-binding protein 1-B OS=Xenopus laevis GN=cpeb1-b PE=2 SV=1	1e-77	1	68.6391	1e-77	169
comp255528_c1_seq1	len=635	-1.40997	5.35462	0.0241917	1	sp|O62650|FST_HORSE	Follistatin OS=Equus caballus GN=FST PE=2 SV=1	2e-13	1	46.4789	2e-13	71
comp261536_c0_seq4	len=1017	-1.2289	1.04542	0.0242393	1	sp|Q49B93|SC5AC_MOUSE	Sodium-coupled monocarboxylate transporter 2 OS=Mus musculus GN=Slc5a12 PE=1 SV=1	7e-34	1	28.9377	7e-34	273
comp241817_c0_seq1	len=2179	-1.25316	3.08526	0.0247033	1	sp|P42773|CDN2C_HUMAN	Cyclin-dependent kinase 4 inhibitor C OS=Homo sapiens GN=CDKN2C PE=1 SV=1	6e-13	1	33.9506	6e-13	162
comp243127_c1_seq1	len=284	-1.17886	0.732082	0.0247066	1	sp|P23377|FURIN_RAT	Furin OS=Rattus norvegicus GN=Furin PE=1 SV=1	5e-28	1	69.0141	5e-28	71
comp255035_c0_seq2	len=1773	-1.68546	0.414894	0.0247101	1	sp|Q9SF85|ADK1_ARATH	Adenosine kinase 1 OS=Arabidopsis thaliana GN=ADK1 PE=1 SV=1	3e-82	1	38.806	3e-82	335
comp260629_c0_seq2	len=2664	1.23477	0.859784	0.0247522	1	sp|O35136|NCAM2_MOUSE	Neural cell adhesion molecule 2 OS=Mus musculus GN=Ncam2 PE=1 SV=1	2e-06	1	22.1429	2e-06	280
comp185821_c0_seq1	len=511	1.07152	3.55241	0.0249744	1	sp|Q8W4N3|UBP2_ARATH	Ubiquitin carboxyl-terminal hydrolase 2 OS=Arabidopsis thaliana GN=UBP2 PE=1 SV=2	7e-11	1	32.5926	7e-11	135
comp219430_c0_seq2	len=1032	1.25313	0.913957	0.0251118	1	sp|Q32LT7|TTYH3_DANRE	Protein tweety homolog 3 OS=Danio rerio GN=ttyh3 PE=2 SV=1	1e-12	1	32.8244	1e-12	131
comp231840_c0_seq1	len=2579	-1.25685	5.19086	0.0251647	1	sp|Q54C16|SGMB_DICDI	Sphingomyelin phosphodiesterase B OS=Dictyostelium discoideum GN=sgmB PE=3 SV=1	4e-50	1	24.8639	4e-50	551
comp216938_c0_seq1	len=755	-1.10604	4.28113	0.02522	1	sp|Q8N2E2|VWDE_HUMAN	von Willebrand factor D and EGF domain-containing protein OS=Homo sapiens GN=VWDE PE=2 SV=4	7e-15	1	40.9639	7e-15	83
comp191553_c0_seq1	len=232	1.35493	5.77238	0.025497	1	sp|P24733|MYS_ARGIR	Myosin heavy chain		NA			NA
comp254588_c0_seq1	len=2407	-1.02963	3.84087	0.0255838	1	sp|Q9H816|DCR1B_HUMAN	5' exonuclease Apollo OS=Homo sapiens GN=DCLRE1B PE=1 SV=1	3e-85	1	47.557	3e-85	307
comp255986_c0_seq1	len=1862	1.00753	3.64677	0.0256577	1	sp|Q8BIA3|MKX_MOUSE	Homeobox protein Mohawk OS=Mus musculus GN=Mkx PE=2 SV=1	2e-37	1	33.8798	2e-37	366
comp243682_c2_seq1	len=646	1.77631	2.87541	0.0256763	1	sp|A7X3Z0|LEC_THRJA	Lectoxin-Thr1 OS=Thrasops jacksonii PE=2 SV=1	2e-09	1	29.2208	2e-09	154
comp250447_c0_seq1	len=1184	-1.06843	3.69817	0.0258252	1	sp|Q6R5N8|TLR13_MOUSE	Toll-like receptor 13 OS=Mus musculus GN=Tlr13 PE=1 SV=1	1e-22	1	25	1e-22	424
comp257003_c0_seq3	len=599	1.91225	1.70491	0.0259401	1	sp|P41962|SODC_BRUPA	Superoxide dismutase [Cu-Zn] OS=Brugia pahangi GN=SODC PE=2 SV=1	1e-26	1	48.4848	1e-26	99
comp249288_c0_seq1	len=1288	2.21893	0.438547	0.0261571	1	sp|P56812|PDCD5_MOUSE	Programmed cell death protein 5 OS=Mus musculus GN=Pdcd5 PE=1 SV=3	5e-26	1	48.0916	5e-26	131
comp261563_c0_seq21	len=218	-1.4278	0.56393	0.026268	1	sp|Q9FGY1|BXL1_ARATH	Beta-D-xylosidase 1 OS=Arabidopsis thaliana GN=BXL1 PE=1 SV=1	2e-10	1	47.4576	2e-10	59
comp260562_c3_seq1	len=679	1.36769	2.10548	0.0264407	1	sp|Q01484|ANK2_HUMAN	Ankyrin-2 OS=Homo sapiens GN=ANK2 PE=1 SV=4	1e-97	1	67.1111	1e-97	225
comp253290_c1_seq1	len=673	-1.31334	1.03418	0.0266438	1	sp|Q9VZW5|FMAR_DROME	FMRFamide receptor OS=Drosophila melanogaster GN=FR PE=2 SV=1	3e-07	1	31.1321	3e-07	106
comp258877_c5_seq2	len=2504	1.1104	3.19822	0.0266601	1	sp|Q54P77|4CL1_DICDI	Probable 4-coumarate--CoA ligase 1 OS=Dictyostelium discoideum GN=4cl1 PE=3 SV=1	1e-108	1	36.9287	1e-108	547
comp258923_c0_seq1	len=4148	1.26891	-0.0488801	0.0269523	1	sp|P30683|GNAO_LYMST	Guanine nucleotide-binding protein G(o) subunit alpha OS=Lymnaea stagnalis PE=2 SV=3	0	1	86.4407	0	354
comp256687_c0_seq21	len=685	-2.71197	2.00194	0.0272432	1	sp|Q96I27|ZN625_HUMAN	Zinc finger protein 625 OS=Homo sapiens GN=ZNF625 PE=2 SV=1	8e-28	1	49.0196	8e-28	102
comp257518_c0_seq4	len=1058	1.09942	3.41375	0.0273016	1	sp|Q5UR67|YR617_MIMIV	Uncharacterized protein R617 OS=Acanthamoeba polyphaga mimivirus GN=MIMI_R617 PE=4 SV=1	1e-07	1	53.3333	1e-07	45
comp258205_c0_seq8	len=547	-1.09732	1.09542	0.0273531	1	sp|Q9Y2F9|BTBD3_HUMAN	BTB/POZ domain-containing protein 3 OS=Homo sapiens GN=BTBD3 PE=2 SV=1	7e-26	1	31.8182	7e-26	176
comp221922_c1_seq1	len=1128	1.03712	2.1151	0.0273693	1	sp|Q14012|KCC1A_HUMAN	Calcium/calmodulin-dependent protein kinase type 1 OS=Homo sapiens GN=CAMK1 PE=1 SV=1	2e-77	1	76.5517	2e-77	145
comp254526_c0_seq1	len=2378	-1.31752	2.19619	0.0274058	1	sp|Q8WNE1|CP2F5_GORGO	Cytochrome P450 2F5 OS=Gorilla gorilla gorilla GN=CYP2F5 PE=3 SV=2	2e-64	1	31.1377	2e-64	501
comp258842_c0_seq1	len=1663	-1.62147	3.08903	0.0274329	1	sp|P18208|GLBM_TYLHE	Giant extracellular hemoglobin linker 2 chain OS=Tylorrhynchus heterochaetus PE=1 SV=1	4e-14	1	32.5926	4e-14	135
comp262125_c0_seq1	len=6749	-2.69719	9.97333	0.0275666	1	sp|Q2PC93|SSPO_CHICK	SCO-spondin OS=Gallus gallus GN=SSPO PE=2 SV=1	0	1	31.8754	0	1509
comp216129_c0_seq1	len=255	-1.03183	1.34896	0.0278266	1	sp|Q92616|GCN1L_HUMAN	Translational activator GCN1 OS=Homo sapiens GN=GCN1L1 PE=1 SV=6	3e-06	1	36.3636	3e-06	77
comp247114_c0_seq1	len=298	1.46086	1.52492	0.0278464	1	sp|Q23120|RSP2_CAEEL	Probable splicing factor		NA			NA
comp207727_c0_seq1	len=995	-1.21005	2.46555	0.0279309	1	sp|Q99758|ABCA3_HUMAN	ATP-binding cassette sub-family A member 3 OS=Homo sapiens GN=ABCA3 PE=1 SV=2	2e-85	1	50.1818	2e-85	275
comp237995_c0_seq1	len=1841	-1.21653	4.55236	0.0280274	1	sp|Q60519|SEM5B_MOUSE	Semaphorin-5B OS=Mus musculus GN=Sema5b PE=2 SV=2	1e-09	1	48.3871	1e-09	62
comp393616_c0_seq1	len=272	-1.16491	0.751448	0.0282501	1	sp|Q8BW94|DYH3_MOUSE	Dynein heavy chain 3		NA			NA
comp242403_c0_seq3	len=955	1.34371	4.08763	0.0283637	1	sp|P04572|SCP_PERVT	Sarcoplasmic calcium-binding protein OS=Perinereis vancaurica tetradentata PE=1 SV=1	5e-25	1	31.8182	5e-25	176
comp254191_c1_seq1	len=232	1.47662	0.595483	0.0283685	1	sp|P98060|NAS35_CAEEL	Zinc metalloproteinase dpy-31 OS=Caenorhabditis elegans GN=dpy-31 PE=1 SV=2	8e-22	1	49.3506	8e-22	77
comp259282_c2_seq4	len=411	-1.91926	5.44405	0.028425	1	sp|O00468|AGRIN_HUMAN	Agrin OS=Homo sapiens GN=AGRN PE=1 SV=5	4e-23	1	38.1679	4e-23	131
comp249115_c0_seq3	len=1656	-1.5081	2.75549	0.0285365	1	sp|Q8YTC2|Y2800_NOSS1	Uncharacterized WD repeat-containing protein alr2800 OS=Nostoc sp, (strain PCC 7120 / UTEX 2576) GN=alr2800 PE=4 SV=1	7e-10	1	24.8963	7e-10	241
comp213706_c0_seq1	len=240	1.10148	1.04211	0.0288701	1	sp|Q4V8D1|CP2U1_RAT	Cytochrome P450 2U1 OS=Rattus norvegicus GN=Cyp2u1 PE=1 SV=1	8e-08	1	35	8e-08	80
comp248173_c0_seq1	len=1361	-1.12782	1.00565	0.029038	1	sp|Q719N3|PAQRB_RAT	Monocyte to macrophage differentiation factor OS=Rattus norvegicus GN=Mmd PE=2 SV=1	6e-63	1	44.2982	6e-63	228
comp239138_c0_seq1	len=1035	1.48086	1.36468	0.0290964	1	sp|Q21974|UNC8_CAEEL	Degenerin unc-8 OS=Caenorhabditis elegans GN=unc-8 PE=2 SV=1	7e-24	1	32.5472	7e-24	212
comp238347_c1_seq1	len=606	-1.20353	0.948599	0.0291599	1	sp|Q9BQI7|PSD2_HUMAN	PH and SEC7 domain-containing protein 2 OS=Homo sapiens GN=PSD2 PE=2 SV=3	6e-37	1	47.8261	6e-37	115
comp204563_c0_seq1	len=536	1.05598	2.9582	0.0294747	1	sp|Q5D1D6|GBP1_CHLAE	Interferon-induced guanylate-binding protein 1 OS=Chlorocebus aethiops GN=GBP1 PE=2 SV=1	2e-29	1	54.955	2e-29	111
comp248899_c0_seq1	len=953	-1.17795	3.20412	0.0297016	1	sp|P43404|ZAP70_MOUSE	Tyrosine-protein kinase ZAP-70 OS=Mus musculus GN=Zap70 PE=1 SV=3	7e-31	1	54.6392	7e-31	97
comp255981_c1_seq1	len=1396	-1.33538	2.1248	0.029779	1	sp|P10394|POL4_DROME	Retrovirus-related Pol polyprotein from transposon 412 OS=Drosophila melanogaster GN=POL PE=4 SV=1	4e-39	1	26.9341	4e-39	349
comp256887_c0_seq8	len=985	1.07758	0.410816	0.0298054	1	sp|Q49B93|SC5AC_MOUSE	Sodium-coupled monocarboxylate transporter 2 OS=Mus musculus GN=Slc5a12 PE=1 SV=1	6e-54	1	32.8173	6e-54	323
comp260966_c2_seq4	len=4443	1.12498	5.60162	0.0298282	1	sp|O14974|MYPT1_HUMAN	Protein phosphatase 1 regulatory subunit 12A OS=Homo sapiens GN=PPP1R12A PE=1 SV=1	2e-84	1	51.89	2e-84	291
comp255210_c2_seq10	len=783	0.99275	2.5024	0.0305809	1	sp|Q9BYR2|KRA45_HUMAN	Keratin-associated protein 4-5 OS=Homo sapiens GN=KRTAP4-5 PE=2 SV=4	9e-06	1	30.0752	9e-06	133
comp259096_c1_seq4	len=1114	-3.38478	8.59898	0.030765	1	sp|Q6L6Q5|LYS_OSTED	Lysozyme OS=Ostrea edulis GN=lysoz PE=2 SV=1	3e-30	1	43.1818	3e-30	132
comp259491_c2_seq1	len=2531	0.965024	0.936909	0.0308658	1	sp|Q9R0N7|SYT7_MOUSE	Synaptotagmin-7 OS=Mus musculus GN=Syt7 PE=1 SV=1	2e-16	1	52.2388	2e-16	67
comp223416_c1_seq1	len=420	-1.00564	1.49215	0.0316193	1	sp|P46939|UTRO_HUMAN	Utrophin OS=Homo sapiens GN=UTRN PE=1 SV=2	1e-06	1	22.8346	1e-06	127
comp247035_c0_seq1	len=612	-1.29098	1.29273	0.0317705	1	sp|P70085|CP17A_ORYLA	Steroid 17-alpha-hydroxylase/17		NA			NA
comp253531_c0_seq2	len=1178	-1.00534	2.83628	0.0318089	1	sp|Q60HD6|PMM2_MACFA	Phosphomannomutase 2 OS=Macaca fascicularis GN=PMM2 PE=2 SV=1	1e-101	1	57.438	1e-101	242
comp239756_c0_seq1	len=494	1.27551	0.848418	0.0319084	1	sp|P04572|SCP_PERVT	Sarcoplasmic calcium-binding protein OS=Perinereis vancaurica tetradentata PE=1 SV=1	4e-21	1	32.3353	4e-21	167
comp260684_c2_seq1	len=532	-1.84458	5.74137	0.0324	1	sp|O62650|FST_HORSE	Follistatin OS=Equus caballus GN=FST PE=2 SV=1	7e-37	1	37.9679	7e-37	187
comp261449_c3_seq1	len=204	0.995557	0.570154	0.0326731	1	sp|Q62141|SIN3B_MOUSE	Paired amphipathic helix protein Sin3b OS=Mus musculus GN=Sin3b PE=1 SV=2	5e-06	1	31.4815	5e-06	54
comp250743_c0_seq1	len=1557	1.20192	5.02358	0.0329522	1	sp|Q5M8W9|HOGA1_XENTR	Probable 4-hydroxy-2-oxoglutarate aldolase		NA			NA
comp244947_c0_seq1	len=1463	-1.59855	3.16816	0.0329711	1	sp|P52889|LHX5_DANRE	LIM/homeobox protein Lhx5 OS=Danio rerio GN=lhx5 PE=2 SV=1	2e-61	1	70.4918	2e-61	122
comp254148_c0_seq2	len=1733	-2.38826	2.37227	0.0330249	1	sp|Q3SZW1|TSSK1_BOVIN	Testis-specific serine/threonine-protein kinase 1 OS=Bos taurus GN=TSSK1B PE=2 SV=1	4e-64	1	42.7586	4e-64	290
comp261315_c0_seq1	len=4538	-1.65389	0.7422	0.0330354	1	sp|Q9VC61|CRERF_DROME	Protein CREBRF homolog OS=Drosophila melanogaster GN=CG13624 PE=2 SV=2	2e-47	1	47.907	2e-47	215
comp244944_c0_seq1	len=899	-1.16271	2.12739	0.0330431	1	sp|Q58DD2|S2611_BOVIN	Sodium-independent sulfate anion transporter OS=Bos taurus GN=SLC26A11 PE=2 SV=1	2e-09	1	29.0909	2e-09	165
comp311751_c0_seq1	len=265	1.02898	1.53986	0.0331642	1	sp|P13388|XMRK_XIPMA	Melanoma receptor tyrosine-protein kinase OS=Xiphophorus maculatus GN=xmrk PE=2 SV=2	2e-13	1	35.7895	2e-13	95
comp320704_c0_seq1	len=253	2.02171	1.25936	0.0331937	1	sp|A0JM12|MEG10_XENTR	Multiple epidermal growth factor-like domains protein 10 OS=Xenopus tropicalis GN=megf10 PE=2 SV=1	1e-08	1	34.9398	1e-08	83
comp254032_c0_seq1	len=1317	1.31014	0.337255	0.0332056	1	sp|Q7PKS9|MTNA_ANOGA	Methylthioribose-1-phosphate isomerase OS=Anopheles gambiae GN=AGAP001589 PE=3 SV=1	1e-140	1	59.0909	1e-140	352
comp243229_c0_seq1	len=776	1.03246	2.88581	0.0332523	1	sp|Q9NZJ4|SACS_HUMAN	Sacsin OS=Homo sapiens GN=SACS PE=1 SV=2	8e-13	1	28.2927	8e-13	205
comp223201_c0_seq1	len=346	-2.3879	1.35294	0.0333563	1	sp|P10076|ZFP26_MOUSE	Zinc finger protein 26 OS=Mus musculus GN=Zfp26 PE=2 SV=2	2e-13	1	43.5484	2e-13	62
comp261247_c0_seq4	len=8656	-1.90039	3.03684	0.0334897	1	sp|Q9H4G0|E41L1_HUMAN	Band 4,1-like protein 1 OS=Homo sapiens GN=EPB41L1 PE=1 SV=2	1e-107	1	52.3952	1e-107	334
comp259812_c0_seq1	len=4381	1.10619	0.338573	0.0335241	1	sp|Q60467|CO5A1_CRILO	Collagen alpha-1(V) chain OS=Cricetulus longicaudatus GN=COL5A1 PE=2 SV=1	4e-71	1	35.7778	4e-71	450
comp250982_c0_seq1	len=998	-1.36938	1.06726	0.0335494	1	sp|Q9Z309|CIB2_MOUSE	Calcium and integrin-binding family member 2 OS=Mus musculus GN=Cib2 PE=2 SV=1	3e-38	1	45.6376	3e-38	149
comp262595_c2_seq3	len=6090	-2.7149	5.67306	0.0336625	1	sp|Q2PC93|SSPO_CHICK	SCO-spondin OS=Gallus gallus GN=SSPO PE=2 SV=1	1e-141	1	27.904	1e-141	1584
comp262125_c0_seq2	len=731	-2.63581	7.73017	0.0339663	1	sp|Q6X0I2|VGR_SOLIN	Vitellogenin receptor OS=Solenopsis invicta GN=VgR PE=2 SV=1	9e-07	1	33.7079	9e-07	89
comp199434_c1_seq1	len=339	-1.45147	0.844779	0.033976	1	sp|Q8IVF4|DYH10_HUMAN	Dynein heavy chain 10		NA			NA
comp261163_c5_seq4	len=2642	-1.46452	5.22633	0.033976	1	sp|O00468|AGRIN_HUMAN	Agrin OS=Homo sapiens GN=AGRN PE=1 SV=5	2e-08	1	41.1765	2e-08	68
comp260225_c0_seq6	len=267	1.10558	0.687316	0.0339774	1	sp|Q9HCF6|TRPM3_HUMAN	Transient receptor potential cation channel subfamily M member 3 OS=Homo sapiens GN=TRPM3 PE=2 SV=4	2e-09	1	28.9474	2e-09	76
comp246253_c1_seq2	len=2477	-1.14437	3.37689	0.0343303	1	sp|H2A0M3|AMO_PINMG	Putative amine oxidase [copper-containing] OS=Pinctada margaritifera PE=1 SV=1	1e-113	1	33.4247	1e-113	730
comp238758_c0_seq1	len=767	-1.0753	2.90351	0.0344666	1	sp|Q9DBW0|CP4V2_MOUSE	Cytochrome P450 4V2 OS=Mus musculus GN=Cyp4v2 PE=1 SV=1	1e-74	1	48.2625	1e-74	259
comp259424_c0_seq6	len=458	1.48041	0.644831	0.0345266	1	sp|Q5BDP1|RSP5_EMENI	E3 ubiquitin-protein ligase RSP5 OS=Emericella nidulans (strain FGSC A4 / ATCC 38163 / CBS 112,46 / NRRL 194 / M139) GN=hulA PE=1 SV=1	2e-11	1	72.973	2e-11	37
comp253718_c1_seq13	len=428	1.02886	3.32194	0.034717	1	sp|O60494|CUBN_HUMAN	Cubilin OS=Homo sapiens GN=CUBN PE=1 SV=5	2e-12	1	29.4118	2e-12	136
comp438841_c0_seq1	len=940	-1.50189	2.26185	0.0348	1	sp|P23352|KALM_HUMAN	Anosmin-1 OS=Homo sapiens GN=KAL1 PE=1 SV=3	7e-32	1	30.9446	7e-32	307
comp243540_c2_seq1	len=289	1.0337	1.07193	0.0348408	1	sp|Q13489|BIRC3_HUMAN	Baculoviral IAP repeat-containing protein 3 OS=Homo sapiens GN=BIRC3 PE=1 SV=2	2e-21	1	70.3704	2e-21	54
comp256901_c0_seq2	len=1088	1.03084	5.62115	0.0350412	1	sp|P00765|TRYP_ASTFL	Trypsin-1 OS=Astacus fluviatilis PE=1 SV=1	5e-50	1	41.9492	5e-50	236
comp235854_c1_seq1	len=232	0.979872	1.09959	0.0351789	1	sp|Q03206|RAC1_CAEEL	Ras-related protein ced-10 OS=Caenorhabditis elegans GN=ced-10 PE=1 SV=2	1e-27	1	72.7273	1e-27	66
comp254503_c1_seq1	len=287	-1.0279	0.758568	0.0352705	1	sp|Q811G0|PTHB1_MOUSE	Protein PTHB1 OS=Mus musculus GN=Bbs9 PE=2 SV=2	5e-18	1	62.5	5e-18	56
comp431975_c0_seq1	len=269	0.956652	0.289124	0.0355839	1	sp|Q8BGD4|SO4C1_MOUSE	Solute carrier organic anion transporter family member 4C1 OS=Mus musculus GN=Slco4c1 PE=2 SV=1	1e-12	1	41.8919	1e-12	74
comp248543_c1_seq1	len=536	0.93606	1.74261	0.0356344	1	sp|Q2W2T7|ANMK_MAGSA	Anhydro-N-acetylmuramic acid kinase OS=Magnetospirillum magneticum (strain AMB-1 / ATCC 700264) GN=anmK PE=3 SV=1	8e-20	1	36.9863	8e-20	146
comp252129_c1_seq1	len=2395	1.02076	5.48579	0.0356412	1	sp|A7DZP8|GPDM_MESAU	Glycerol-3-phosphate dehydrogenase		NA			NA
comp222870_c0_seq1	len=357	1.02522	0.643369	0.0358521	1	sp|Q9BWV1|BOC_HUMAN	Brother of CDO OS=Homo sapiens GN=BOC PE=1 SV=1	2e-11	1	35.9649	2e-11	114
comp139833_c0_seq1	len=228	-1.02372	0.482914	0.0359418	1	sp|Q91437|PYR1_SQUAC	CAD protein OS=Squalus acanthias GN=CAD PE=2 SV=1	7e-39	1	86.6667	7e-39	75
comp233750_c1_seq1	len=783	-1.04685	1.08354	0.0360145	1	sp|Q9Y4C0|NRX3A_HUMAN	Neurexin-3 OS=Homo sapiens GN=NRXN3 PE=1 SV=4	4e-37	1	34.2857	4e-37	210
comp140750_c0_seq1	len=401	-0.996471	1.22541	0.0360432	1	sp|Q6ED65|EMAL5_RAT	Echinoderm microtubule-associated protein-like 5 OS=Rattus norvegicus GN=Eml5 PE=1 SV=2	2e-52	1	59.7015	2e-52	134
comp247468_c0_seq3	len=2113	0.928309	1.47633	0.0360698	1	sp|B4ZIX8|SCC4_XENLA	MAU2 chromatid cohesion factor homolog OS=Xenopus laevis GN=mau2 PE=1 SV=1	1e-101	1	59.9303	1e-101	287
comp258020_c0_seq2	len=3421	-1.98051	2.82809	0.0360743	1	sp|P05089|ARGI1_HUMAN	Arginase-1 OS=Homo sapiens GN=ARG1 PE=1 SV=2	2e-90	1	47.9365	2e-90	315
comp259716_c0_seq1	len=2843	1.35153	1.36845	0.0362042	1	sp|A2T737|EHF_PANTR	ETS homologous factor OS=Pan troglodytes GN=EHF PE=3 SV=1	2e-17	1	43.299	2e-17	97
comp169226_c0_seq1	len=237	-1.08559	0.209867	0.0367784	1	sp|Q5ZKD5|RRP12_CHICK	RRP12-like protein OS=Gallus gallus GN=RRP12 PE=2 SV=1	2e-10	1	37.6623	2e-10	77
comp243596_c0_seq1	len=1615	0.967004	5.73023	0.0368776	1	sp|P55006|RDH7_RAT	Retinol dehydrogenase 7 OS=Rattus norvegicus GN=Rdh7 PE=2 SV=1	3e-76	1	44.4444	3e-76	288
comp191397_c0_seq1	len=2130	1.13816	8.86786	0.0371355	1	sp|P17900|SAP3_HUMAN	Ganglioside GM2 activator OS=Homo sapiens GN=GM2A PE=1 SV=4	1e-28	1	35.8974	1e-28	156
comp250198_c0_seq1	len=379	-0.99519	1.86046	0.0373665	1	sp|Q9D882|CJ035_MOUSE	Uncharacterized protein C10orf35 homolog OS=Mus musculus PE=2 SV=1	3e-19	1	36.8421	3e-19	114
comp259276_c0_seq4	len=1176	-1.65605	2.46682	0.0375482	1	sp|Q96PP9|GBP4_HUMAN	Guanylate-binding protein 4 OS=Homo sapiens GN=GBP4 PE=1 SV=2	2e-70	1	33.8384	2e-70	396
comp258701_c0_seq1	len=4196	-1.96569	6.27345	0.0377157	1	sp|Q6YHK3|CD109_HUMAN	CD109 antigen OS=Homo sapiens GN=CD109 PE=1 SV=2	0	1	33.6251	0	1371
comp248553_c1_seq1	len=1951	-1.59314	5.07602	0.0378129	1	sp|Q96E17|RAB3C_HUMAN	Ras-related protein Rab-3C OS=Homo sapiens GN=RAB3C PE=2 SV=1	1e-119	1	77.0925	1e-119	227
comp259815_c0_seq1	len=4100	1.26328	9.15352	0.0378309	1	sp|Q9VEN1|FLNA_DROME	Filamin-A OS=Drosophila melanogaster GN=cher PE=1 SV=2	0	1	40.9639	0	830
comp253555_c0_seq1	len=1745	1.06845	2.0651	0.0379082	1	sp|P35331|NRCAM_CHICK	Neuronal cell adhesion molecule OS=Gallus gallus PE=1 SV=1	1e-19	1	27.8986	1e-19	276
comp262248_c1_seq1	len=864	-1.00706	1.34411	0.0379237	1	sp|Q6P1Q0|LTMD1_HUMAN	LETM1 domain-containing protein 1 OS=Homo sapiens GN=LETMD1 PE=1 SV=1	1e-41	1	32.9749	1e-41	279
comp237457_c1_seq1	len=523	-1.37476	1.07572	0.0379365	1	sp|Q6NXG1|ESRP1_HUMAN	Epithelial splicing regulatory protein 1 OS=Homo sapiens GN=ESRP1 PE=1 SV=2	4e-26	1	43.5374	4e-26	147
comp258740_c0_seq1	len=1629	1.23288	4.42383	0.0380854	1	sp|Q96JQ5|M4A4A_HUMAN	Membrane-spanning 4-domains subfamily A member 4A OS=Homo sapiens GN=MS4A4A PE=2 SV=1	5e-09	1	29.3233	5e-09	133
comp250272_c0_seq1	len=1840	-0.958211	4.69811	0.0389134	1	sp|Q63ZL3|HRG1A_XENLA	Heme transporter hrg1-A OS=Xenopus laevis GN=slc48a1-a PE=2 SV=1	1e-15	1	36.4964	1e-15	137
comp246271_c0_seq3	len=1511	1.46421	2.28314	0.0389572	1	sp|Q8K4G1|LTBP4_MOUSE	Latent-transforming growth factor beta-binding protein 4 OS=Mus musculus GN=Ltbp4 PE=2 SV=2	1e-12	1	34.5361	1e-12	194
comp253662_c1_seq1	len=1143	1.08172	2.51675	0.0389678	1	sp|Q09575|YRD6_CAEEL	Uncharacterized protein K02A2,6 OS=Caenorhabditis elegans GN=K02A2,6 PE=2 SV=1	4e-18	1	25.6055	4e-18	289
comp243047_c3_seq1	len=2033	-1.20308	3.4865	0.039375	1	sp|D3YXS5|KLP6_MOUSE	Kinesin-like protein KLP6 OS=Mus musculus GN=Klp6 PE=3 SV=1	1e-50	1	30.7317	1e-50	410
comp246106_c0_seq1	len=3571	-1.26111	4.47866	0.03948	1	sp|Q6UJY2|SL9C1_MOUSE	Sodium/hydrogen exchanger 10 OS=Mus musculus GN=Slc9c1 PE=1 SV=3	6e-42	1	21.513	6e-42	846
comp255706_c1_seq1	len=2091	0.977032	2.88693	0.0395252	1	sp|P54922|ADPRH_HUMAN	[Protein ADP-ribosylarginine] hydrolase OS=Homo sapiens GN=ADPRH PE=1 SV=1	1e-121	1	50.7082	1e-121	353
comp253759_c1_seq1	len=496	-1.07407	1.53848	0.0401141	1	sp|P08955|PYR1_MESAU	CAD protein OS=Mesocricetus auratus GN=CAD PE=1 SV=4	3e-10	1	31.4286	3e-10	175
comp152781_c0_seq1	len=209	1.12848	0.12461	0.0404482	1	sp|Q13733|AT1A4_HUMAN	Sodium/potassium-transporting ATPase subunit alpha-4 OS=Homo sapiens GN=ATP1A4 PE=1 SV=3	8e-06	1	47.3684	8e-06	38
comp258259_c0_seq1	len=227	0.920765	0.759909	0.0404662	1	sp|Q8BTY8|SCFD2_MOUSE	Sec1 family domain-containing protein 2 OS=Mus musculus GN=Scfd2 PE=2 SV=1	1e-07	1	39.726	1e-07	73
comp243553_c0_seq3	len=1638	2.64552	1.67226	0.0405574	1	sp|Q9UMS0|NFU1_HUMAN	NFU1 iron-sulfur cluster scaffold homolog		NA			NA
comp232057_c2_seq1	len=369	-1.32376	0.456094	0.0405915	1	sp|Q7Z449|CP2U1_HUMAN	Cytochrome P450 2U1 OS=Homo sapiens GN=CYP2U1 PE=1 SV=1	4e-31	1	44.8276	4e-31	116
comp238599_c0_seq1	len=529	-1.09716	1.68383	0.0406203	1	sp|B2RX88|CSPP1_MOUSE	Centrosome and spindle pole associated protein 1 OS=Mus musculus GN=Cspp1 PE=1 SV=2	2e-06	1	33.3333	2e-06	105
comp256103_c1_seq2	len=1765	1.90019	0.299437	0.0406763	1	sp|P33527|MRP1_HUMAN	Multidrug resistance-associated protein 1 OS=Homo sapiens GN=ABCC1 PE=1 SV=3	2e-84	1	72.1951	2e-84	205
comp252840_c0_seq1	len=830	1.15499	0.713474	0.0407035	1	sp|Q29IK4|RM22_DROPS	39S ribosomal protein L22		NA			NA
comp243040_c0_seq1	len=656	-1.01218	2.19415	0.0407865	1	sp|Q3V1V3|ESF1_MOUSE	ESF1 homolog OS=Mus musculus GN=Esf1 PE=1 SV=1	6e-27	1	45.1613	6e-27	124
comp261401_c0_seq2	len=4000	-1.91919	1.93444	0.0408827	1	sp|Q5EAJ7|MVP_STRPU	Major vault protein OS=Strongylocentrotus purpuratus GN=MVP PE=1 SV=1	0	1	68.3529	0	850
comp217341_c0_seq1	len=1511	-1.15351	4.43374	0.0408859	1	sp|Q6R748|STXB1_CHICK	Syntaxin-binding protein 1 OS=Gallus gallus GN=STXBP1 PE=2 SV=1	0	1	64.7727	0	440
comp244088_c0_seq1	len=827	-0.940445	1.9752	0.0409175	1	sp|Q9Y2G3|AT11B_HUMAN	Probable phospholipid-transporting ATPase IF OS=Homo sapiens GN=ATP11B PE=1 SV=2	2e-67	1	43.2234	2e-67	273
comp175409_c0_seq1	len=910	-1.18879	1.36506	0.0409382	1	sp|Q0R4F1|PIF1_XENLA	ATP-dependent DNA helicase PIF1 OS=Xenopus laevis GN=pif1 PE=2 SV=1	1e-124	1	58.9404	1e-124	302
comp258943_c0_seq3	len=1107	-2.75698	6.80692	0.0409422	1	sp|P07911|UROM_HUMAN	Uromodulin OS=Homo sapiens GN=UMOD PE=1 SV=1	7e-20	1	34.6154	7e-20	182
comp261839_c0_seq2	len=4268	1.46451	0.770991	0.0412472	1	sp|P18422|PSA3_RAT	Proteasome subunit alpha type-3 OS=Rattus norvegicus GN=Psma3 PE=1 SV=3	1e-104	1	68.4426	1e-104	244
comp250581_c1_seq1	len=1384	1.00699	3.89161	0.0414133	1	sp|P61214|ARL4A_RAT	ADP-ribosylation factor-like protein 4A OS=Rattus norvegicus GN=Arl4a PE=2 SV=1	2e-64	1	56.9832	2e-64	179
comp252065_c0_seq1	len=3028	-1.57347	1.14583	0.0414589	1	sp|P28572|SC6A9_RAT	Sodium- and chloride-dependent glycine transporter 1 OS=Rattus norvegicus GN=Slc6a9 PE=1 SV=2	1e-161	1	43.0796	1e-161	578
comp197636_c0_seq1	len=232	-1.26307	0.843156	0.0414852	1	sp|P10978|POLX_TOBAC	Retrovirus-related Pol polyprotein from transposon TNT 1-94 OS=Nicotiana tabacum PE=2 SV=1	9e-10	1	47.3684	9e-10	57
comp239050_c0_seq1	len=710	1.12243	3.07366	0.041531	1	sp|Q9N2M8|HDC_DROME	Headcase protein OS=Drosophila melanogaster GN=hdc PE=1 SV=2	1e-13	1	42.3077	1e-13	78
comp258943_c0_seq2	len=1679	-2.7474	6.68792	0.0415731	1	sp|Q8N2E2|VWDE_HUMAN	von Willebrand factor D and EGF domain-containing protein OS=Homo sapiens GN=VWDE PE=2 SV=4	3e-10	1	23.2653	3e-10	245
comp204851_c0_seq1	len=512	1.15079	1.23953	0.041616	1	sp|Q11116|YX0A_CAEEL	Uncharacterized protein C03B1,10 OS=Caenorhabditis elegans GN=C03B1,10 PE=4 SV=1	1e-11	1	68.9655	1e-11	29
comp260433_c0_seq27	len=574	-2.73904	1.72595	0.0420475	1	sp|O15232|MATN3_HUMAN	Matrilin-3 OS=Homo sapiens GN=MATN3 PE=1 SV=2	3e-09	1	38.8889	3e-09	90
comp242656_c1_seq1	len=1932	-1.30765	2.79955	0.0421864	1	sp|P18293|ANPRA_MOUSE	Atrial natriuretic peptide receptor 1 OS=Mus musculus GN=Npr1 PE=2 SV=2	1e-128	1	43.9453	1e-128	512
comp233917_c0_seq1	len=744	1.11507	4.51522	0.0423322	1	sp|Q7T3T8|ZAR1_DANRE	Zygote arrest protein 1 OS=Danio rerio GN=zar1 PE=2 SV=1	2e-21	1	39.1304	2e-21	92
comp242584_c1_seq1	len=862	-1.34587	1.0889	0.0426627	1	sp|Q6DCX5|PCFT_XENLA	Proton-coupled folate transporter OS=Xenopus laevis GN=slc46a1 PE=2 SV=1	3e-16	1	33.0935	3e-16	139
comp211937_c0_seq1	len=266	1.00209	1.03669	0.0428232	1	sp|Q95SX7|RTBS_DROME	Probable RNA-directed DNA polymerase from transposon BS OS=Drosophila melanogaster GN=RTase PE=2 SV=1	5e-07	1	38.5714	5e-07	70
comp261861_c2_seq6	len=3112	1.38214	1.44172	0.0428395	1	sp|Q3TZZ7|ESYT2_MOUSE	Extended synaptotagmin-2 OS=Mus musculus GN=Esyt2 PE=1 SV=1	1e-124	1	31.8584	1e-124	791
comp249288_c0_seq2	len=1306	-1.43566	1.52652	0.04342	1	sp|P56812|PDCD5_MOUSE	Programmed cell death protein 5 OS=Mus musculus GN=Pdcd5 PE=1 SV=3	6e-26	1	48.0916	6e-26	131
comp237505_c3_seq1	len=1685	-2.08031	4.0913	0.0434978	1	sp|P27590|UROM_RAT	Uromodulin OS=Rattus norvegicus GN=Umod PE=2 SV=1	7e-18	1	39.3939	7e-18	132
comp261230_c0_seq2	len=1755	-1.17043	1.84062	0.044099	1	sp|P16066|ANPRA_HUMAN	Atrial natriuretic peptide receptor 1 OS=Homo sapiens GN=NPR1 PE=1 SV=1	5e-93	1	49.1279	5e-93	344
comp147429_c0_seq1	len=531	-0.949257	1.89842	0.0441457	1	sp|A8Y1P7|BRE4_CAEBR	Beta-1		NA			NA
comp241090_c0_seq1	len=823	0.923947	3.05861	0.0441471	1	sp|P39059|COFA1_HUMAN	Collagen alpha-1(XV) chain OS=Homo sapiens GN=COL15A1 PE=1 SV=2	4e-27	1	36.4583	4e-27	192
comp198164_c0_seq1	len=618	-0.958472	1.52075	0.0444731	1	sp|Q6MZW2|FSTL4_HUMAN	Follistatin-related protein 4 OS=Homo sapiens GN=FSTL4 PE=2 SV=3	8e-25	1	30.9859	8e-25	213
comp248552_c0_seq2	len=704	-0.963923	2.42816	0.0445039	1	sp|Q498E7|SMAL1_XENLA	SWI/SNF-related matrix-associated actin-dependent regulator of chromatin subfamily A-like protein 1 OS=Xenopus laevis GN=smarcal1 PE=2 SV=1	3e-82	1	55	3e-82	240
comp243270_c0_seq1	len=683	0.966051	2.25407	0.0445332	1	sp|P23049|SEA_AVIET	Tyrosine-protein kinase transforming protein SEA OS=Avian erythroblastosis virus (strain S13) GN=V-SEA PE=3 SV=2	1e-68	1	52.4064	1e-68	187
comp231072_c0_seq1	len=1381	1.14775	8.23588	0.0446045	1	sp|Q54NE6|PGAM_DICDI	Probable phosphoglycerate mutase OS=Dictyostelium discoideum GN=gpmA PE=1 SV=1	1e-118	1	65.7258	1e-118	248
comp168162_c0_seq1	len=395	1.10098	3.52637	0.0448257	1	sp|P0C6B8|SVEP1_RAT	Sushi		NA			NA
comp253061_c0_seq2	len=1223	-1.04484	1.90505	0.0448798	1	sp|P00429|CX6B1_BOVIN	Cytochrome c oxidase subunit 6B1 OS=Bos taurus GN=COX6B1 PE=1 SV=2	2e-29	1	58.75	2e-29	80
comp251814_c1_seq1	len=1261	-0.962354	2.08598	0.0449752	1	sp|P17342|ANPRC_HUMAN	Atrial natriuretic peptide receptor 3 OS=Homo sapiens GN=NPR3 PE=1 SV=2	4e-19	1	30.4813	4e-19	187
comp239082_c1_seq2	len=1223	0.928182	0.0785764	0.0449926	1	sp|P35790|CHKA_HUMAN	Choline kinase alpha OS=Homo sapiens GN=CHKA PE=1 SV=3	1e-107	1	49.7076	1e-107	342
comp242749_c0_seq1	len=277	-1.24858	1.05482	0.0450292	1	sp|Q18823|LAM2_CAEEL	Laminin-like protein lam-2 OS=Caenorhabditis elegans GN=lam-2 PE=1 SV=3	7e-19	1	44.7368	7e-19	76
comp258205_c0_seq3	len=1181	-1.28561	2.07893	0.0451769	1	sp|Q96KE9|BTBD6_HUMAN	BTB/POZ domain-containing protein 6 OS=Homo sapiens GN=BTBD6 PE=1 SV=3	4e-34	1	28.8344	4e-34	326
comp243956_c1_seq1	len=1523	1.04939	3.77588	0.0453924	1	sp|O95198|KLHL2_HUMAN	Kelch-like protein 2 OS=Homo sapiens GN=KLHL2 PE=1 SV=2	0	1	63.3178	0	428
comp254041_c1_seq1	len=328	-1.20802	1.54296	0.0454457	1	sp|P00185|CP1A1_RAT	Cytochrome P450 1A1 OS=Rattus norvegicus GN=Cyp1a1 PE=1 SV=1	3e-29	1	49.5495	3e-29	111
comp254248_c0_seq1	len=3840	-1.0791	5.06042	0.0456251	1	sp|Q9VR59|VIP1_DROME	Inositol hexakisphosphate and diphosphoinositol-pentakisphosphate kinase OS=Drosophila melanogaster GN=l(1)G0196 PE=1 SV=2	0	1	67.6609	0	637
comp248462_c0_seq1	len=1023	0.918224	3.39942	0.0458956	1	sp|P34576|MUA3_CAEEL	Transmembrane cell adhesion receptor mua-3 OS=Caenorhabditis elegans GN=mua-3 PE=1 SV=2	3e-21	1	34.3137	3e-21	204
comp251570_c0_seq1	len=643	1.03199	5.06691	0.0465073	1	sp|A2AX52|CO6A4_MOUSE	Collagen alpha-4(VI) chain OS=Mus musculus GN=Col6a4 PE=1 SV=2	2e-12	1	32.5397	2e-12	126
comp251526_c2_seq1	len=788	-1.09548	1.82259	0.0466819	1	sp|Q54G05|LRRX1_DICDI	Putative leucine-rich repeat-containing protein DDB_G0290503 OS=Dictyostelium discoideum GN=DDB_G0290503 PE=4 SV=1	9e-12	1	22.1198	9e-12	217
comp146187_c0_seq1	len=360	-1.12008	1.23593	0.0466938	1	sp|Q640B4|MUS81_XENTR	Crossover junction endonuclease MUS81 OS=Xenopus tropicalis GN=mus81 PE=2 SV=1	3e-45	1	61.7886	3e-45	123
comp262574_c0_seq5	len=1113	0.892153	1.36698	0.0468026	1	sp|P12311|ADH1_GEOSE	Alcohol dehydrogenase OS=Geobacillus stearothermophilus GN=adhT PE=1 SV=2	4e-20	1	27.8481	4e-20	316
comp248543_c0_seq1	len=263	0.925544	1.04239	0.0468272	1	sp|Q8RD30|ANMK_THETN	Anhydro-N-acetylmuramic acid kinase OS=Thermoanaerobacter tengcongensis (strain DSM 15242 / JCM 11007 / NBRC 100824 / MB4) GN=anmK PE=3 SV=1	1e-07	1	35.8974	1e-07	78
comp209087_c0_seq1	len=344	-1.00983	0.974876	0.0470394	1	sp|Q8TE73|DYH5_HUMAN	Dynein heavy chain 5		NA			NA
comp242038_c0_seq1	len=1112	0.923607	5.90265	0.0470801	1	sp|P82977|ICIW_WHEAT	Subtilisin-chymotrypsin inhibitor WSCI OS=Triticum aestivum PE=1 SV=2	1e-13	1	45	1e-13	60
comp214564_c1_seq1	len=511	1.26052	1.17863	0.0472874	1	sp|P51789|CLCN2_RABIT	Chloride channel protein 2 OS=Oryctolagus cuniculus GN=CLCN2 PE=2 SV=1	8e-49	1	57.4074	8e-49	162
comp259785_c0_seq1	len=4100	-2.12404	1.24665	0.0474473	1	sp|P97379|G3BP2_MOUSE	Ras GTPase-activating protein-binding protein 2 OS=Mus musculus GN=G3bp2 PE=1 SV=2	2e-39	1	39.5652	2e-39	230
comp241752_c0_seq1	len=1085	-1.1714	3.85858	0.0475011	1	sp|Q9R0N7|SYT7_MOUSE	Synaptotagmin-7 OS=Mus musculus GN=Syt7 PE=1 SV=1	1e-107	1	53.0466	1e-107	279
comp255452_c1_seq1	len=1131	0.878255	3.4621	0.0475308	1	sp|Q76JQ2|FLCN_RAT	Folliculin OS=Rattus norvegicus GN=Flcn PE=2 SV=1	5e-21	1	47.1154	5e-21	104
comp223306_c0_seq1	len=404	-1.02506	0.758561	0.0477815	1	sp|Q8IY84|NIM1_HUMAN	Serine/threonine-protein kinase NIM1 OS=Homo sapiens GN=NIM1 PE=1 SV=1	2e-62	1	70.8955	2e-62	134
comp254179_c5_seq2	len=1501	-1.17728	3.76285	0.0478117	1	sp|B3LFU6|SP110_YEAS1	Spindle pole body component 110 OS=Saccharomyces cerevisiae (strain RM11-1a) GN=SPC110 PE=3 SV=1	2e-10	1	22.9333	2e-10	375
comp251121_c0_seq1	len=1753	-0.997463	4.41926	0.0478721	1	sp|Q99PI5|LPIN2_MOUSE	Phosphatidate phosphatase LPIN2 OS=Mus musculus GN=Lpin2 PE=1 SV=2	3e-87	1	49.5177	3e-87	311
comp254233_c1_seq1	len=3332	-1.42371	2.38478	0.047914	1	sp|P16320|NOF_DROME	120,7 kDa protein in NOF-FB transposable element OS=Drosophila melanogaster GN=NOF PE=4 SV=2	6e-09	1	23.9535	6e-09	430
comp241779_c1_seq1	len=532	1.21741	2.43305	0.047929	1	sp|Q3UHL1|CAMKV_MOUSE	CaM kinase-like vesicle-associated protein OS=Mus musculus GN=Camkv PE=1 SV=2	8e-06	1	28.2051	8e-06	117
comp257194_c0_seq1	len=1814	0.865936	3.1696	0.0479318	1	sp|Q6DHB5|LHPL3_DANRE	Lipoma HMGIC fusion partner-like 3 protein OS=Danio rerio GN=lhfpl3 PE=2 SV=1	4e-41	1	40.5556	4e-41	180
comp250002_c0_seq2	len=517	0.929729	1.29587	0.0480535	1	sp|Q9Y6N9|USH1C_HUMAN	Harmonin OS=Homo sapiens GN=USH1C PE=1 SV=3	2e-18	1	39.3258	2e-18	89
comp231409_c0_seq1	len=298	-0.930774	0.909966	0.0480707	1	sp|Q9WUH1|TM115_MOUSE	Transmembrane protein 115 OS=Mus musculus GN=Tmem115 PE=1 SV=1	3e-10	1	48.2143	3e-10	56
comp241591_c0_seq1	len=1677	-0.912699	3.92693	0.0481108	1	sp|Q5T6L9|CF070_HUMAN	Transmembrane protein C6orf70 OS=Homo sapiens GN=C6orf70 PE=2 SV=1	4e-34	1	36.9792	4e-34	192
comp242849_c2_seq4	len=456	-0.99651	0.94066	0.0482064	1	sp|B5T255|PGRP1_BOSIN	Peptidoglycan recognition protein 1 OS=Bos indicus GN=PGLYRP1 PE=3 SV=1	9e-37	1	44.9612	9e-37	129
comp246192_c0_seq1	len=1143	-1.61746	2.31499	0.0482605	1	sp|Q96RY7|IF140_HUMAN	Intraflagellar transport protein 140 homolog OS=Homo sapiens GN=IFT140 PE=1 SV=1	1e-88	1	41.1458	1e-88	384
comp222672_c0_seq1	len=354	0.897295	0.82776	0.0483388	1	sp|O73775|FBLN1_CHICK	Fibulin-1 OS=Gallus gallus GN=FBLN1 PE=2 SV=2	2e-07	1	48.7805	2e-07	41
comp243552_c2_seq1	len=719	0.962964	2.59397	0.0484248	1	sp|Q8WSR4|ITPR_ASTPE	Inositol 1		NA			NA
comp235602_c0_seq1	len=675	-0.988253	2.59105	0.0486306	1	sp|Q9DBW0|CP4V2_MOUSE	Cytochrome P450 4V2 OS=Mus musculus GN=Cyp4v2 PE=1 SV=1	2e-21	1	58.6667	2e-21	75
comp223706_c0_seq1	len=281	-1.07341	0.377974	0.0487084	1	sp|Q9UBV7|B4GT7_HUMAN	Beta-1		NA			NA
comp391210_c0_seq1	len=254	-1.17233	0.736092	0.0487565	1	sp|Q27802|DYHC2_TRIGR	Cytoplasmic dynein 2 heavy chain 1 OS=Tripneustes gratilla GN=DYH1B PE=2 SV=2	3e-23	1	50.6173	3e-23	81
comp251297_c0_seq3	len=1304	-1.28072	1.18024	0.0488375	1	sp|Q60519|SEM5B_MOUSE	Semaphorin-5B OS=Mus musculus GN=Sema5b PE=2 SV=2	4e-10	1	50	4e-10	56
comp244592_c0_seq1	len=858	-1.08028	0.796723	0.0489862	1	sp|Q8HWS3|RFX6_HUMAN	DNA-binding protein RFX6 OS=Homo sapiens GN=RFX6 PE=1 SV=2	1e-16	1	29.703	1e-16	202
comp231413_c1_seq1	len=526	-1.14919	1.09217	0.0493454	1	sp|Q8IVF4|DYH10_HUMAN	Dynein heavy chain 10		NA			NA
comp258715_c4_seq26	len=1212	0.975069	1.72098	0.0493906	1	sp|Q5EB30|ODF3A_XENTR	Outer dense fiber protein 3 OS=Xenopus tropicalis GN=odf3 PE=2 SV=1	1e-81	1	49.7942	1e-81	243
comp253857_c0_seq3	len=622	-0.980073	1.70099	0.0494102	1	sp|Q9JLJ4|ELOV2_MOUSE	Elongation of very long chain fatty acids protein 2 OS=Mus musculus GN=Elovl2 PE=2 SV=1	2e-14	1	43.0233	2e-14	86
comp247178_c0_seq1	len=327	-1.14917	1.05545	0.0495069	1	sp|Q9BRZ2|TRI56_HUMAN	E3 ubiquitin-protein ligase TRIM56 OS=Homo sapiens GN=TRIM56 PE=1 SV=3	3e-07	1	24.7788	3e-07	113
comp231824_c0_seq1	len=1485	-1.01663	2.42742	0.0495158	1	sp|Q5R4V3|KC1G3_PONAB	Casein kinase I isoform gamma-3 OS=Pongo abelii GN=CSNK1G3 PE=2 SV=1	1e-131	1	50.8434	1e-131	415
comp256481_c3_seq1	len=2842	-1.1319	4.53281	0.04967	1	sp|Q9NZJ4|SACS_HUMAN	Sacsin OS=Homo sapiens GN=SACS PE=1 SV=2	1e-53	1	24.031	1e-53	1032
comp259236_c0_seq1	len=1450	0.946241	4.3752	0.0497046	1	sp|Q6DFT6|SPTSA_XENTR	Serine palmitoyltransferase small subunit A OS=Xenopus tropicalis GN=sptssa PE=3 SV=1	9e-10	1	35.9375	9e-10	64
comp237403_c0_seq1	len=829	0.960415	1.45029	0.0497596	1	sp|Q5SVZ6|ZMYM1_HUMAN	Zinc finger MYM-type protein 1 OS=Homo sapiens GN=ZMYM1 PE=2 SV=1	3e-10	1	29.1925	3e-10	161
comp257980_c0_seq2	len=2387	0.94198	3.45314	0.0497808	1	sp|Q75WE7|VWA5A_RAT	von Willebrand factor A domain-containing protein 5A OS=Rattus norvegicus GN=Vwa5a PE=2 SV=1	1e-100	1	34.3612	1e-100	681
comp260239_c0_seq2	len=2200	1.52609	0.261929	0.0498037	1	sp|Q5RC80|RBM39_PONAB	RNA-binding protein 39 OS=Pongo abelii GN=RBM39 PE=2 SV=1	1e-135	1	56.5684	1e-135	373
comp211892_c0_seq1	len=393	1.1562	0.682218	0.0498752	1	sp|O75132|ZBED4_HUMAN	Zinc finger BED domain-containing protein 4 OS=Homo sapiens GN=ZBED4 PE=1 SV=2	2e-18	1	36.5217	2e-18	115
comp260120_c1_seq5	len=2259	0.913137	4.77218	0.0499345	1	sp|Q9BQE3|TBA1C_HUMAN	Tubulin alpha-1C chain OS=Homo sapiens GN=TUBA1C PE=1 SV=1	0	1	93.0556	0	432
comp258152_c0_seq1	len=1453	1.18307	2.54004	0.0499574	1	sp|B2GV54|NCEH1_RAT	Neutral cholesterol ester hydrolase 1 OS=Rattus norvegicus GN=Nceh1 PE=2 SV=1	6e-55	1	32.5459	6e-55	381
comp248102_c2_seq1	len=266	-1.38646	0.964573	0.00890235	0.675251	NA	NA	NA	NA	NA	NA	NA
comp129523_c0_seq1	len=226	9.41393	0.81296	3.7e-26	1.02e-21	NA	NA	NA	NA	NA	NA	NA
comp256618_c5_seq5	len=1191	-7.9568	3.40168	7.04e-24	1.3e-19	NA	NA	NA	NA	NA	NA	NA
comp204224_c0_seq1	len=300	9.03791	0.465042	2.93e-23	4.05e-19	NA	NA	NA	NA	NA	NA	NA
comp257291_c3_seq11	len=253	7.5445	0.645156	4.93e-22	5.46e-18	NA	NA	NA	NA	NA	NA	NA
comp231876_c0_seq2	len=615	-9.20588	0.964393	5e-20	4.61e-16	NA	NA	NA	NA	NA	NA	NA
comp227748_c2_seq1	len=244	6.00021	0.342387	8.8e-20	6.95e-16	NA	NA	NA	NA	NA	NA	NA
comp151686_c0_seq1	len=220	7.22745	0.270739	5.12e-19	3.54e-15	NA	NA	NA	NA	NA	NA	NA
comp515301_c0_seq1	len=211	5.40497	0.139756	4.62e-17	2.84e-13	NA	NA	NA	NA	NA	NA	NA
comp259444_c2_seq3	len=1260	10.0277	2.0676	1.01e-15	5.59e-12	NA	NA	NA	NA	NA	NA	NA
comp181426_c0_seq1	len=319	7.76727	-0.580182	3.2e-15	1.61e-11	NA	NA	NA	NA	NA	NA	NA
comp330043_c0_seq1	len=346	6.21385	0.649748	3.53e-15	1.63e-11	NA	NA	NA	NA	NA	NA	NA
comp226659_c0_seq1	len=235	1.38259	1.27249	0.00171482	0.251587	NA	NA	NA	NA	NA	NA	NA
comp151083_c0_seq1	len=426	-8.03856	0.797437	1.47e-14	5.79e-11	NA	NA	NA	NA	NA	NA	NA
comp211087_c0_seq1	len=960	-10.2804	2.0254	6.85e-14	2.53e-10	NA	NA	NA	NA	NA	NA	NA
comp311187_c0_seq1	len=233	-7.82344	0.505242	3.34e-13	1.15e-09	NA	NA	NA	NA	NA	NA	NA
comp237493_c0_seq1	len=401	2.34306	1.4695	0.00176583	0.256352	NA	NA	NA	NA	NA	NA	NA
comp174567_c0_seq1	len=317	5.3598	-0.553605	7.73e-13	2.38e-09	NA	NA	NA	NA	NA	NA	NA
comp240050_c0_seq2	len=291	8.73841	0.933492	1.73e-12	5.03e-09	NA	NA	NA	NA	NA	NA	NA
comp279595_c0_seq1	len=632	5.0419	3.63233	1.87e-12	5.16e-09	NA	NA	NA	NA	NA	NA	NA
comp255535_c3_seq2	len=677	5.29003	3.90756	2.22e-12	5.85e-09	NA	NA	NA	NA	NA	NA	NA
comp199384_c1_seq1	len=553	-9.28243	1.43743	2.63e-12	6.61e-09	NA	NA	NA	NA	NA	NA	NA
comp259444_c2_seq1	len=1320	-5.89798	1.93544	3.56e-12	8.5e-09	NA	NA	NA	NA	NA	NA	NA
comp179997_c0_seq1	len=211	-7.95553	0.378671	3.69e-12	8.5e-09	NA	NA	NA	NA	NA	NA	NA
comp166181_c0_seq1	len=761	6.31067	1.51699	5.19e-12	1.15e-08	NA	NA	NA	NA	NA	NA	NA
comp311413_c0_seq1	len=226	4.28318	0.895556	1.07e-11	2.28e-08	NA	NA	NA	NA	NA	NA	NA
comp259138_c0_seq2	len=1968	-5.40462	0.965056	1.65e-11	3.38e-08	NA	NA	NA	NA	NA	NA	NA
comp559602_c0_seq1	len=290	4.55815	-0.280394	2.13e-11	4.07e-08	NA	NA	NA	NA	NA	NA	NA
comp252783_c0_seq2	len=385	1.97717	0.357113	0.00196235	0.276182	NA	NA	NA	NA	NA	NA	NA
comp261957_c3_seq1	len=1176	4.5396	0.333332	2.21e-11	4.07e-08	NA	NA	NA	NA	NA	NA	NA
comp131485_c0_seq1	len=269	-6.31044	0.128199	2.36e-11	4.21e-08	NA	NA	NA	NA	NA	NA	NA
comp251963_c2_seq2	len=912	-1.56295	1.15019	0.00200632	0.280231	NA	NA	NA	NA	NA	NA	NA
comp166888_c0_seq1	len=396	-7.96134	0.173909	3.69e-11	6.19e-08	NA	NA	NA	NA	NA	NA	NA
comp199384_c0_seq1	len=232	-8.06865	0.207526	5.84e-11	9.51e-08	NA	NA	NA	NA	NA	NA	NA
comp216575_c0_seq1	len=362	-2.12992	1.48245	0.00210472	0.291765	NA	NA	NA	NA	NA	NA	NA
comp230832_c0_seq1	len=691	2.28512	2.09824	0.00213948	0.295842	NA	NA	NA	NA	NA	NA	NA
comp221260_c0_seq1	len=257	-6.47714	0.441547	6.77e-11	1.01e-07	NA	NA	NA	NA	NA	NA	NA
comp205383_c1_seq1	len=225	5.95072	-0.25359	8.49e-11	1.24e-07	NA	NA	NA	NA	NA	NA	NA
comp178178_c0_seq1	len=406	-1.93655	1.39459	0.00220055	0.302022	NA	NA	NA	NA	NA	NA	NA
comp256512_c1_seq15	len=426	2.60452	2.43711	0.00221528	0.30329	NA	NA	NA	NA	NA	NA	NA
comp171567_c0_seq1	len=1455	-11.3093	3.23214	1.27e-10	1.72e-07	NA	NA	NA	NA	NA	NA	NA
comp257610_c1_seq3	len=1252	7.7443	3.76509	1.96e-10	2.58e-07	NA	NA	NA	NA	NA	NA	NA
comp221076_c0_seq1	len=246	3.83797	-0.182588	2.44e-10	3.14e-07	NA	NA	NA	NA	NA	NA	NA
comp240050_c0_seq3	len=414	6.32121	0.378598	3.98e-10	5.01e-07	NA	NA	NA	NA	NA	NA	NA
comp247589_c2_seq1	len=253	-5.30142	-0.62756	0.00227951	0.308269	NA	NA	NA	NA	NA	NA	NA
comp453121_c0_seq1	len=335	-8.36407	0.35416	5.2e-10	6.25e-07	NA	NA	NA	NA	NA	NA	NA
comp187640_c0_seq1	len=357	-7.77711	0.0957788	6.7e-10	7.88e-07	NA	NA	NA	NA	NA	NA	NA
comp191855_c0_seq1	len=319	1.48267	0.352516	0.0100162	0.713925	NA	NA	NA	NA	NA	NA	NA
comp138264_c0_seq1	len=826	-10.2094	2.14616	8.14e-10	9.19e-07	NA	NA	NA	NA	NA	NA	NA
comp214707_c0_seq1	len=206	-8.35672	0.393517	1.02e-09	1.13e-06	NA	NA	NA	NA	NA	NA	NA
comp252043_c2_seq2	len=364	-9.15633	1.14066	1.46e-09	1.59e-06	NA	NA	NA	NA	NA	NA	NA
comp505122_c0_seq1	len=255	-7.99788	0.0703439	1.56e-09	1.65e-06	NA	NA	NA	NA	NA	NA	NA
comp240884_c1_seq1	len=203	3.50951	0.0710686	1.61e-09	1.68e-06	NA	NA	NA	NA	NA	NA	NA
comp259778_c1_seq1	len=636	-6.45367	0.610185	1.91e-09	1.96e-06	NA	NA	NA	NA	NA	NA	NA
comp246742_c0_seq1	len=393	3.63356	0.291618	2.07e-09	2.08e-06	NA	NA	NA	NA	NA	NA	NA
comp238945_c0_seq1	len=405	-1.52031	2.54229	0.00241308	0.317785	NA	NA	NA	NA	NA	NA	NA
comp362353_c0_seq1	len=321	-9.10122	0.99554	2.8e-09	2.72e-06	NA	NA	NA	NA	NA	NA	NA
comp148656_c0_seq1	len=245	2.23608	-0.0380659	0.00247092	0.32386	NA	NA	NA	NA	NA	NA	NA
comp243739_c0_seq3	len=774	-1.87648	0.993707	0.00248092	0.324403	NA	NA	NA	NA	NA	NA	NA
comp255351_c0_seq4	len=632	6.10335	2.47135	3.18e-09	2.93e-06	NA	NA	NA	NA	NA	NA	NA
comp335102_c0_seq1	len=244	3.56548	0.646812	4.98e-09	4.52e-06	NA	NA	NA	NA	NA	NA	NA
comp260499_c4_seq1	len=926	-4.66969	2.84227	6.6e-09	5.89e-06	NA	NA	NA	NA	NA	NA	NA
comp530119_c0_seq1	len=225	-7.64456	-0.215524	7.58e-09	6.66e-06	NA	NA	NA	NA	NA	NA	NA
comp260070_c2_seq1	len=536	-4.33865	1.29551	1.04e-08	9.02e-06	NA	NA	NA	NA	NA	NA	NA
comp240716_c0_seq1	len=251	4.52373	0.913358	1.16e-08	9.87e-06	NA	NA	NA	NA	NA	NA	NA
comp257396_c0_seq2	len=1107	-7.34428	0.631301	1.85e-08	1.55e-05	NA	NA	NA	NA	NA	NA	NA
comp241087_c0_seq2	len=1095	4.28531	1.06335	2.02e-08	1.67e-05	NA	NA	NA	NA	NA	NA	NA
comp260072_c2_seq1	len=722	7.64076	1.44334	2.74e-08	2.23e-05	NA	NA	NA	NA	NA	NA	NA
comp484616_c0_seq1	len=450	-8.43923	0.568402	2.8e-08	2.23e-05	NA	NA	NA	NA	NA	NA	NA
comp213353_c0_seq1	len=208	3.42292	-0.539292	2.83e-08	2.23e-05	NA	NA	NA	NA	NA	NA	NA
comp236359_c0_seq1	len=426	3.22172	1.36382	3.48e-08	2.71e-05	NA	NA	NA	NA	NA	NA	NA
comp259847_c0_seq1	len=829	-1.63637	1.78067	0.00272933	0.346243	NA	NA	NA	NA	NA	NA	NA
comp240050_c0_seq1	len=455	-3.50681	0.745309	4.18e-08	3.16e-05	NA	NA	NA	NA	NA	NA	NA
comp236359_c1_seq1	len=444	3.48417	1.35452	4.81e-08	3.6e-05	NA	NA	NA	NA	NA	NA	NA
comp369455_c0_seq1	len=260	-4.84702	0.464158	4.93e-08	3.63e-05	NA	NA	NA	NA	NA	NA	NA
comp223465_c0_seq1	len=611	-3.99994	1.47525	5.3e-08	3.86e-05	NA	NA	NA	NA	NA	NA	NA
comp251714_c0_seq1	len=324	7.46709	-0.289145	6.74e-08	4.84e-05	NA	NA	NA	NA	NA	NA	NA
comp255824_c6_seq1	len=1267	5.49789	2.76038	9.01e-08	6.39e-05	NA	NA	NA	NA	NA	NA	NA
comp211761_c1_seq1	len=686	-4.58691	0.990961	1.01e-07	7.07e-05	NA	NA	NA	NA	NA	NA	NA
comp234474_c0_seq2	len=310	3.46832	0.57798	1.82e-07	0.000125977	NA	NA	NA	NA	NA	NA	NA
comp201571_c0_seq1	len=503	-5.5692	2.03144	1.93e-07	0.000131717	NA	NA	NA	NA	NA	NA	NA
comp241763_c1_seq1	len=521	-1.50124	1.1605	0.00286808	0.355315	NA	NA	NA	NA	NA	NA	NA
comp253277_c3_seq1	len=1644	6.06451	2.41754	2.08e-07	0.000138355	NA	NA	NA	NA	NA	NA	NA
comp138008_c0_seq1	len=384	3.35507	2.45324	2.36e-07	0.000155413	NA	NA	NA	NA	NA	NA	NA
comp175613_c0_seq1	len=203	2.76675	2.91814	2.95e-07	0.000192026	NA	NA	NA	NA	NA	NA	NA
comp225290_c0_seq1	len=268	2.82969	0.156782	3.32e-07	0.000213218	NA	NA	NA	NA	NA	NA	NA
comp243810_c0_seq1	len=425	-7.49205	-0.141178	3.68e-07	0.000234165	NA	NA	NA	NA	NA	NA	NA
comp223468_c0_seq1	len=294	-3.4345	0.769313	3.76e-07	0.000236072	NA	NA	NA	NA	NA	NA	NA
comp259026_c0_seq1	len=1662	1.66383	0.710492	0.0108934	0.737419	NA	NA	NA	NA	NA	NA	NA
comp193775_c0_seq1	len=588	4.98898	4.09242	5.58e-07	0.000342828	NA	NA	NA	NA	NA	NA	NA
comp272536_c0_seq1	len=895	3.35054	4.1214	5.68e-07	0.000345476	NA	NA	NA	NA	NA	NA	NA
comp140747_c0_seq1	len=461	3.85648	1.49183	6.14e-07	0.000368862	NA	NA	NA	NA	NA	NA	NA
comp258252_c2_seq2	len=222	-3.81463	0.909101	6.37e-07	0.00037861	NA	NA	NA	NA	NA	NA	NA
comp230286_c0_seq1	len=1380	-3.70848	2.54482	8.81e-07	0.000518606	NA	NA	NA	NA	NA	NA	NA
comp251361_c2_seq1	len=231	1.34539	0.690851	0.00310843	0.374576	NA	NA	NA	NA	NA	NA	NA
comp261364_c2_seq7	len=524	4.72422	0.225235	1.16e-06	0.000666509	NA	NA	NA	NA	NA	NA	NA
comp256724_c3_seq1	len=368	-7.04377	0.179167	1.2e-06	0.000683717	NA	NA	NA	NA	NA	NA	NA
comp222171_c1_seq1	len=222	2.66137	0.936385	1.67e-06	0.000943864	NA	NA	NA	NA	NA	NA	NA
comp219319_c0_seq1	len=323	-6.58736	0.0787419	1.73e-06	0.000966475	NA	NA	NA	NA	NA	NA	NA
comp161471_c0_seq2	len=444	-3.00409	0.402879	1.93e-06	0.00106841	NA	NA	NA	NA	NA	NA	NA
comp217440_c0_seq1	len=834	-3.82132	3.30616	2.06e-06	0.00112653	NA	NA	NA	NA	NA	NA	NA
comp130611_c0_seq1	len=393	3.30206	0.199465	2.08e-06	0.00112839	NA	NA	NA	NA	NA	NA	NA
comp238143_c1_seq1	len=958	-4.08537	2.58774	3.6e-06	0.00193231	NA	NA	NA	NA	NA	NA	NA
comp230255_c0_seq1	len=417	-3.3392	1.01681	4.11e-06	0.00218453	NA	NA	NA	NA	NA	NA	NA
comp142888_c0_seq1	len=477	3.09969	3.20356	4.27e-06	0.00224674	NA	NA	NA	NA	NA	NA	NA
comp173800_c0_seq1	len=250	2.63177	-0.200263	4.42e-06	0.00230583	NA	NA	NA	NA	NA	NA	NA
comp259406_c0_seq2	len=1596	-4.02617	1.78878	5.33e-06	0.00275295	NA	NA	NA	NA	NA	NA	NA
comp260871_c0_seq2	len=1095	-5.1536	4.48371	6.06e-06	0.00310602	NA	NA	NA	NA	NA	NA	NA
comp208703_c0_seq1	len=551	1.74338	0.737716	0.00340924	0.397989	NA	NA	NA	NA	NA	NA	NA
comp244986_c0_seq1	len=1008	3.79081	1.52091	7.7e-06	0.00387279	NA	NA	NA	NA	NA	NA	NA
comp258226_c0_seq1	len=259	3.54439	0.193408	7.91e-06	0.00394271	NA	NA	NA	NA	NA	NA	NA
comp246359_c1_seq1	len=465	1.57178	0.428522	0.00344478	0.399018	NA	NA	NA	NA	NA	NA	NA
comp220801_c0_seq1	len=365	-7.20645	0.712408	8.55e-06	0.0041839	NA	NA	NA	NA	NA	NA	NA
comp240131_c0_seq1	len=565	-7.00525	0.394805	9.99e-06	0.00481752	NA	NA	NA	NA	NA	NA	NA
comp228294_c1_seq1	len=362	-3.28174	0.318204	1e-05	0.00481752	NA	NA	NA	NA	NA	NA	NA
comp246850_c2_seq1	len=360	-1.37087	0.433187	0.0117515	0.769687	NA	NA	NA	NA	NA	NA	NA
comp364916_c0_seq1	len=420	2.32841	1.47218	0.00350186	0.402685	NA	NA	NA	NA	NA	NA	NA
comp251879_c0_seq1	len=810	2.97857	1.59196	1.11e-05	0.00518307	NA	NA	NA	NA	NA	NA	NA
comp241486_c0_seq1	len=500	-1.63942	2.61914	0.00354756	0.405558	NA	NA	NA	NA	NA	NA	NA
comp220822_c0_seq1	len=211	2.51567	-0.110875	1.2e-05	0.00551499	NA	NA	NA	NA	NA	NA	NA
comp206249_c0_seq1	len=325	2.2979	0.0607819	1.23e-05	0.00562756	NA	NA	NA	NA	NA	NA	NA
comp166734_c0_seq1	len=217	3.58932	1.56273	1.24e-05	0.00563116	NA	NA	NA	NA	NA	NA	NA
comp232618_c1_seq1	len=457	-3.19179	0.890346	1.28e-05	0.0057766	NA	NA	NA	NA	NA	NA	NA
comp251808_c2_seq4	len=860	3.65663	0.34867	1.43e-05	0.00636348	NA	NA	NA	NA	NA	NA	NA
comp247143_c2_seq2	len=456	3.09775	0.827127	1.57e-05	0.00695565	NA	NA	NA	NA	NA	NA	NA
comp261364_c2_seq15	len=743	2.85335	0.803682	1.59e-05	0.00698568	NA	NA	NA	NA	NA	NA	NA
comp229496_c1_seq1	len=278	2.81677	0.225856	1.72e-05	0.00747398	NA	NA	NA	NA	NA	NA	NA
comp254372_c0_seq2	len=326	-4.9841	5.102	1.76e-05	0.00756118	NA	NA	NA	NA	NA	NA	NA
comp550011_c0_seq1	len=337	2.80432	0.287355	1.76e-05	0.00756118	NA	NA	NA	NA	NA	NA	NA
comp250190_c0_seq1	len=291	1.41167	1.4889	0.00377298	0.422444	NA	NA	NA	NA	NA	NA	NA
comp249118_c1_seq1	len=820	2.29265	3.25217	1.96e-05	0.00826541	NA	NA	NA	NA	NA	NA	NA
comp249857_c0_seq1	len=917	-3.08237	1.69201	2.06e-05	0.00862865	NA	NA	NA	NA	NA	NA	NA
comp249439_c0_seq1	len=1108	-2.45837	0.213655	2.15e-05	0.00892196	NA	NA	NA	NA	NA	NA	NA
comp255980_c0_seq3	len=437	2.6164	1.85571	2.23e-05	0.00920107	NA	NA	NA	NA	NA	NA	NA
comp262021_c2_seq4	len=348	-4.59703	-0.411755	2.31e-05	0.00944232	NA	NA	NA	NA	NA	NA	NA
comp239127_c0_seq1	len=207	2.13985	2.58417	2.32e-05	0.00944232	NA	NA	NA	NA	NA	NA	NA
comp262329_c2_seq2	len=711	-3.29331	2.83849	2.37e-05	0.00955123	NA	NA	NA	NA	NA	NA	NA
comp241087_c0_seq1	len=1237	2.98437	3.19557	2.54e-05	0.0101079	NA	NA	NA	NA	NA	NA	NA
comp243821_c3_seq1	len=297	2.11944	0.534226	2.54e-05	0.0101079	NA	NA	NA	NA	NA	NA	NA
comp259728_c0_seq2	len=1249	3.64934	-0.049678	2.57e-05	0.0101331	NA	NA	NA	NA	NA	NA	NA
comp228294_c0_seq1	len=395	-2.61793	-0.0421381	0.00393815	0.431333	NA	NA	NA	NA	NA	NA	NA
comp261074_c7_seq2	len=1829	3.26363	-0.272917	2.65e-05	0.0103336	NA	NA	NA	NA	NA	NA	NA
comp258654_c0_seq1	len=1815	-2.27123	-0.0488615	0.0039746	0.433287	NA	NA	NA	NA	NA	NA	NA
comp248877_c0_seq1	len=885	2.14455	3.81913	2.89e-05	0.0111154	NA	NA	NA	NA	NA	NA	NA
comp246637_c0_seq1	len=507	2.58825	0.95652	3e-05	0.01144	NA	NA	NA	NA	NA	NA	NA
comp277610_c0_seq1	len=250	3.49666	2.72227	3.27e-05	0.0123978	NA	NA	NA	NA	NA	NA	NA
comp256512_c1_seq4	len=221	6.21475	1.08031	3.34e-05	0.012569	NA	NA	NA	NA	NA	NA	NA
comp244843_c0_seq1	len=990	-2.12887	3.54285	3.51e-05	0.0131098	NA	NA	NA	NA	NA	NA	NA
comp257219_c0_seq2	len=718	-2.34503	2.25708	0.00414307	0.44442	NA	NA	NA	NA	NA	NA	NA
comp256417_c1_seq14	len=431	-3.5749	0.158996	3.76e-05	0.0138532	NA	NA	NA	NA	NA	NA	NA
comp254076_c0_seq1	len=811	1.5303	2.09974	0.00414526	0.44442	NA	NA	NA	NA	NA	NA	NA
comp207239_c1_seq1	len=205	2.30558	-0.0139942	3.81e-05	0.0138532	NA	NA	NA	NA	NA	NA	NA
comp260903_c7_seq1	len=350	-3.6283	0.599221	3.86e-05	0.0139141	NA	NA	NA	NA	NA	NA	NA
comp233197_c0_seq1	len=230	-3.37038	0.985855	3.9e-05	0.0139141	NA	NA	NA	NA	NA	NA	NA
comp143497_c0_seq1	len=362	2.15149	2.49578	3.9e-05	0.0139141	NA	NA	NA	NA	NA	NA	NA
comp232360_c0_seq1	len=801	-2.85326	1.8065	0.00423752	0.450733	NA	NA	NA	NA	NA	NA	NA
comp229716_c0_seq1	len=360	2.61699	-0.200299	4.16e-05	0.0146685	NA	NA	NA	NA	NA	NA	NA
comp212464_c0_seq1	len=388	-2.81108	0.482304	4.33e-05	0.0151442	NA	NA	NA	NA	NA	NA	NA
comp204360_c0_seq1	len=669	1.74079	1.18088	0.00429641	0.454377	NA	NA	NA	NA	NA	NA	NA
comp214600_c1_seq1	len=510	-6.35042	0.855176	4.43e-05	0.015322	NA	NA	NA	NA	NA	NA	NA
comp238443_c1_seq1	len=514	-1.3697	1.10448	0.00435469	0.458786	NA	NA	NA	NA	NA	NA	NA
comp259460_c0_seq1	len=1401	-1.71112	1.86887	0.00438683	0.461292	NA	NA	NA	NA	NA	NA	NA
comp177717_c0_seq1	len=370	2.95324	1.02252	4.9e-05	0.0166407	NA	NA	NA	NA	NA	NA	NA
comp252240_c0_seq3	len=209	-3.93122	1.45294	5.08e-05	0.0171468	NA	NA	NA	NA	NA	NA	NA
comp239550_c0_seq1	len=808	-8.06188	1.20886	5.24e-05	0.0175789	NA	NA	NA	NA	NA	NA	NA
comp242051_c0_seq3	len=509	2.29848	-0.311809	5.48e-05	0.0182448	NA	NA	NA	NA	NA	NA	NA
comp241814_c1_seq1	len=918	2.3383	-0.240562	0.00449716	0.46575	NA	NA	NA	NA	NA	NA	NA
comp217491_c0_seq1	len=698	-4.19218	2.05514	5.93e-05	0.0195301	NA	NA	NA	NA	NA	NA	NA
comp239550_c0_seq5	len=1245	-7.77176	1.28482	6.45e-05	0.0210985	NA	NA	NA	NA	NA	NA	NA
comp218783_c0_seq1	len=364	-2.41154	1.51926	6.68e-05	0.0217404	NA	NA	NA	NA	NA	NA	NA
comp259556_c0_seq1	len=2134	2.36334	-0.0763663	6.9e-05	0.0223314	NA	NA	NA	NA	NA	NA	NA
comp173596_c0_seq1	len=386	2.35085	3.32418	7.25e-05	0.0233132	NA	NA	NA	NA	NA	NA	NA
comp246191_c0_seq1	len=700	-1.68226	1.64684	0.00452184	0.46575	NA	NA	NA	NA	NA	NA	NA
comp255073_c0_seq2	len=327	-2.82819	0.713733	8.05e-05	0.0255936	NA	NA	NA	NA	NA	NA	NA
comp179032_c1_seq1	len=204	3.0811	0.532703	8.22e-05	0.0259444	NA	NA	NA	NA	NA	NA	NA
comp511558_c0_seq1	len=391	-2.78235	0.147879	8.26e-05	0.0259444	NA	NA	NA	NA	NA	NA	NA
comp250997_c0_seq4	len=728	2.19909	0.957062	8.64e-05	0.0270072	NA	NA	NA	NA	NA	NA	NA
comp376872_c0_seq1	len=416	-5.25509	0.71321	8.94e-05	0.0277738	NA	NA	NA	NA	NA	NA	NA
comp251857_c1_seq2	len=914	-3.2026	0.402088	9.38e-05	0.0289455	NA	NA	NA	NA	NA	NA	NA
comp218026_c0_seq1	len=221	2.21461	0.560219	9.42e-05	0.0289455	NA	NA	NA	NA	NA	NA	NA
comp217795_c1_seq1	len=306	-4.28649	-0.0328105	9.49e-05	0.0290102	NA	NA	NA	NA	NA	NA	NA
comp168056_c0_seq1	len=244	-2.04882	1.1503	9.71e-05	0.0295227	NA	NA	NA	NA	NA	NA	NA
comp249493_c0_seq2	len=662	-1.81448	3.08081	9.99e-05	0.0301881	NA	NA	NA	NA	NA	NA	NA
comp138458_c0_seq1	len=434	2.15376	1.28774	0.000101772	0.030593	NA	NA	NA	NA	NA	NA	NA
comp253306_c0_seq1	len=217	3.13352	4.92378	0.000104689	0.0312998	NA	NA	NA	NA	NA	NA	NA
comp262034_c0_seq8	len=777	-3.59306	3.11383	0.000105709	0.0314346	NA	NA	NA	NA	NA	NA	NA
comp235158_c0_seq1	len=343	-1.57802	0.449704	0.00475601	0.477241	NA	NA	NA	NA	NA	NA	NA
comp256123_c0_seq3	len=373	3.16924	3.67805	0.000108625	0.0319583	NA	NA	NA	NA	NA	NA	NA
comp217457_c0_seq1	len=238	-6.00508	1.34075	0.00010977	0.0321243	NA	NA	NA	NA	NA	NA	NA
comp251198_c0_seq1	len=440	2.75295	1.53802	0.000111877	0.0325687	NA	NA	NA	NA	NA	NA	NA
comp246338_c0_seq2	len=429	-2.7087	2.00927	0.000115555	0.0333182	NA	NA	NA	NA	NA	NA	NA
comp159889_c0_seq1	len=391	-2.35103	2.33477	0.000115657	0.0333182	NA	NA	NA	NA	NA	NA	NA
comp254152_c1_seq1	len=315	-3.50315	2.96838	0.000120546	0.0345467	NA	NA	NA	NA	NA	NA	NA
comp242503_c0_seq2	len=612	-2.42243	0.817648	0.000121955	0.0347704	NA	NA	NA	NA	NA	NA	NA
comp261708_c0_seq9	len=231	4.07647	1.51662	0.000129529	0.0367404	NA	NA	NA	NA	NA	NA	NA
comp226569_c2_seq1	len=248	3.07411	0.265407	0.000131614	0.0371414	NA	NA	NA	NA	NA	NA	NA
comp261957_c3_seq2	len=1200	-2.17266	0.859886	0.00492484	0.485558	NA	NA	NA	NA	NA	NA	NA
comp159512_c0_seq1	len=279	3.19907	0.0698074	0.00014312	0.0399802	NA	NA	NA	NA	NA	NA	NA
comp253306_c1_seq1	len=1071	3.15362	7.17452	0.000146664	0.0407645	NA	NA	NA	NA	NA	NA	NA
comp142321_c0_seq1	len=293	2.07472	0.266721	0.000148423	0.0410471	NA	NA	NA	NA	NA	NA	NA
comp249376_c0_seq3	len=319	-2.61655	-0.283893	0.000149514	0.0411055	NA	NA	NA	NA	NA	NA	NA
comp193775_c1_seq1	len=2357	4.35449	6.38898	0.00015012	0.0411055	NA	NA	NA	NA	NA	NA	NA
comp469148_c0_seq1	len=419	-6.89795	0.170142	0.00015256	0.0415678	NA	NA	NA	NA	NA	NA	NA
comp167347_c0_seq1	len=232	-2.44271	0.971539	0.000156722	0.0424925	NA	NA	NA	NA	NA	NA	NA
comp261374_c2_seq5	len=451	1.84975	0.856272	0.00509225	0.494664	NA	NA	NA	NA	NA	NA	NA
comp230832_c0_seq2	len=700	-3.19683	0.825359	0.000170076	0.0455922	NA	NA	NA	NA	NA	NA	NA
comp192396_c1_seq1	len=242	-1.15796	0.649361	0.0262267	1	NA	NA	NA	NA	NA	NA	NA
comp149650_c0_seq1	len=426	-3.2269	2.47971	0.000175317	0.0466201	NA	NA	NA	NA	NA	NA	NA
comp237974_c0_seq1	len=1243	-2.8595	4.18605	0.000176423	0.0466897	NA	NA	NA	NA	NA	NA	NA
comp259577_c1_seq1	len=292	2.64444	0.397364	0.000181399	0.047778	NA	NA	NA	NA	NA	NA	NA
comp249047_c0_seq5	len=682	-3.52102	0.980459	0.000182599	0.0478661	NA	NA	NA	NA	NA	NA	NA
comp234606_c0_seq1	len=438	2.12978	-0.221022	0.000186091	0.0485512	NA	NA	NA	NA	NA	NA	NA
comp216309_c0_seq1	len=514	-5.76285	0.716475	0.000191653	0.0493734	NA	NA	NA	NA	NA	NA	NA
comp233825_c0_seq1	len=535	-2.19172	1.75622	0.000191987	0.0493734	NA	NA	NA	NA	NA	NA	NA
comp139929_c0_seq1	len=285	2.21837	0.264548	0.000192259	0.0493734	NA	NA	NA	NA	NA	NA	NA
comp235015_c2_seq1	len=943	-2.95651	1.44918	0.000192812	0.0493734	NA	NA	NA	NA	NA	NA	NA
comp255325_c2_seq13	len=633	-3.50849	0.197196	0.000194267	0.0495167	NA	NA	NA	NA	NA	NA	NA
comp278669_c0_seq1	len=463	2.58633	2.73456	0.000195216	0.0495301	NA	NA	NA	NA	NA	NA	NA
comp244819_c0_seq1	len=393	-1.99202	1.02385	0.000200119	0.0505423	NA	NA	NA	NA	NA	NA	NA
comp259370_c0_seq1	len=287	1.81361	0.548344	0.00549577	0.520386	NA	NA	NA	NA	NA	NA	NA
comp258291_c0_seq3	len=1783	2.7363	1.56283	0.000218651	0.0547231	NA	NA	NA	NA	NA	NA	NA
comp259695_c1_seq4	len=858	2.77158	0.132998	0.000221166	0.0551032	NA	NA	NA	NA	NA	NA	NA
comp253337_c0_seq2	len=318	-2.20317	0.87453	0.00022293	0.0552937	NA	NA	NA	NA	NA	NA	NA
comp257122_c1_seq1	len=752	-2.49531	2.61694	0.000230742	0.0568787	NA	NA	NA	NA	NA	NA	NA
comp227893_c2_seq1	len=326	-2.74584	-0.01313	0.000231377	0.0568787	NA	NA	NA	NA	NA	NA	NA
comp258311_c0_seq1	len=279	-2.25597	0.677591	0.000241679	0.0591483	NA	NA	NA	NA	NA	NA	NA
comp262577_c0_seq4	len=6438	2.56919	1.97892	0.000250326	0.0609947	NA	NA	NA	NA	NA	NA	NA
comp260083_c0_seq2	len=2236	2.7272	1.92493	0.000261005	0.0633178	NA	NA	NA	NA	NA	NA	NA
comp231819_c0_seq1	len=783	-1.94807	1.04658	0.000266937	0.064474	NA	NA	NA	NA	NA	NA	NA
comp201760_c0_seq1	len=212	-1.27887	0.560386	0.0147707	0.852802	NA	NA	NA	NA	NA	NA	NA
comp250049_c0_seq1	len=620	-3.67989	2.45134	0.000289463	0.0693095	NA	NA	NA	NA	NA	NA	NA
comp249118_c0_seq1	len=259	2.34803	1.40831	0.000290768	0.0693218	NA	NA	NA	NA	NA	NA	NA
comp218483_c0_seq1	len=439	1.85	0.656664	0.00589488	0.54615	NA	NA	NA	NA	NA	NA	NA
comp256512_c1_seq7	len=665	2.8898	3.63322	0.000321632	0.0758262	NA	NA	NA	NA	NA	NA	NA
comp275441_c0_seq1	len=211	-3.60602	1.18389	0.000322668	0.0758262	NA	NA	NA	NA	NA	NA	NA
comp168145_c0_seq1	len=244	-2.02802	2.42607	0.000323534	0.0758262	NA	NA	NA	NA	NA	NA	NA
comp253982_c0_seq4	len=529	-3.74324	0.0648865	0.0003278	0.0765019	NA	NA	NA	NA	NA	NA	NA
comp179065_c0_seq1	len=279	-2.07842	0.550331	0.000330512	0.0768107	NA	NA	NA	NA	NA	NA	NA
comp212731_c0_seq1	len=331	2.37918	0.312379	0.000340336	0.078763	NA	NA	NA	NA	NA	NA	NA
comp248703_c0_seq1	len=700	-1.99222	1.33026	0.00035118	0.0809337	NA	NA	NA	NA	NA	NA	NA
comp261877_c3_seq1	len=316	-2.1279	0.394715	0.000364591	0.0836758	NA	NA	NA	NA	NA	NA	NA
comp255920_c5_seq8	len=921	-3.67248	2.09309	0.000367629	0.0840245	NA	NA	NA	NA	NA	NA	NA
comp166600_c0_seq1	len=399	-2.30586	0.778463	0.000378506	0.0861546	NA	NA	NA	NA	NA	NA	NA
comp362428_c0_seq1	len=231	1.91009	1.07107	0.000383508	0.0868559	NA	NA	NA	NA	NA	NA	NA
comp136289_c0_seq1	len=297	2.1003	0.155502	0.000384728	0.0868559	NA	NA	NA	NA	NA	NA	NA
comp260871_c0_seq1	len=408	2.52919	3.14959	0.00039036	0.0874888	NA	NA	NA	NA	NA	NA	NA
comp195895_c0_seq1	len=307	1.28309	4.55102	0.0154118	0.874301	NA	NA	NA	NA	NA	NA	NA
comp256186_c0_seq3	len=204	-1.92023	0.943066	0.000406926	0.090756	NA	NA	NA	NA	NA	NA	NA
comp236576_c0_seq1	len=350	-1.96922	0.88139	0.000420199	0.0930576	NA	NA	NA	NA	NA	NA	NA
comp251020_c1_seq1	len=1455	3.20568	4.44191	0.000421986	0.0930576	NA	NA	NA	NA	NA	NA	NA
comp246045_c0_seq1	len=262	2.33445	1.2022	0.000422293	0.0930576	NA	NA	NA	NA	NA	NA	NA
comp250552_c2_seq1	len=292	1.82031	-0.310994	0.000444094	0.0974733	NA	NA	NA	NA	NA	NA	NA
comp257480_c1_seq1	len=308	-1.64857	0.849976	0.000450772	0.098548	NA	NA	NA	NA	NA	NA	NA
comp241875_c0_seq1	len=405	-1.01811	0.325365	0.0390849	1	NA	NA	NA	NA	NA	NA	NA
comp219844_c2_seq1	len=602	1.32415	1.83443	0.0157312	0.885082	NA	NA	NA	NA	NA	NA	NA
comp231020_c0_seq1	len=582	-3.96058	0.923917	0.000483761	0.104521	NA	NA	NA	NA	NA	NA	NA
comp131106_c0_seq1	len=550	-2.81423	1.04341	0.000496493	0.106854	NA	NA	NA	NA	NA	NA	NA
comp253855_c1_seq1	len=1054	2.07735	0.596989	0.000527313	0.113047	NA	NA	NA	NA	NA	NA	NA
comp223846_c0_seq1	len=378	1.50618	0.401883	0.0065391	0.580168	NA	NA	NA	NA	NA	NA	NA
comp253458_c3_seq2	len=229	-2.14441	0.848384	0.000536028	0.114032	NA	NA	NA	NA	NA	NA	NA
comp243941_c1_seq2	len=241	-2.77449	2.48185	0.000544653	0.115423	NA	NA	NA	NA	NA	NA	NA
comp246714_c3_seq2	len=464	2.2064	2.20602	0.000571008	0.120197	NA	NA	NA	NA	NA	NA	NA
comp259483_c1_seq1	len=411	-2.00573	0.704134	0.000571529	0.120197	NA	NA	NA	NA	NA	NA	NA
comp624394_c0_seq1	len=207	-2.70594	0.0085183	0.00058596	0.122616	NA	NA	NA	NA	NA	NA	NA
comp161471_c0_seq1	len=460	2.67158	0.863315	0.000587815	0.122616	NA	NA	NA	NA	NA	NA	NA
comp211052_c0_seq1	len=248	1.36808	0.0581518	0.00664891	0.583743	NA	NA	NA	NA	NA	NA	NA
comp242459_c0_seq1	len=753	-1.21101	2.11127	0.0160286	0.890621	NA	NA	NA	NA	NA	NA	NA
comp239506_c4_seq1	len=311	-2.33997	0.778807	0.00060132	0.124103	NA	NA	NA	NA	NA	NA	NA
comp236412_c0_seq2	len=401	2.09538	0.669091	0.000605273	0.124455	NA	NA	NA	NA	NA	NA	NA
comp274504_c0_seq1	len=550	1.75751	3.4003	0.0067384	0.58613	NA	NA	NA	NA	NA	NA	NA
comp260797_c3_seq1	len=432	1.82998	0.0621846	0.00673886	0.58613	NA	NA	NA	NA	NA	NA	NA
comp252094_c2_seq9	len=1915	2.10422	1.16281	0.000615172	0.125095	NA	NA	NA	NA	NA	NA	NA
comp288442_c0_seq1	len=258	2.43186	1.46918	0.000630763	0.127534	NA	NA	NA	NA	NA	NA	NA
comp236493_c0_seq1	len=290	3.34164	0.862399	0.000631781	0.127534	NA	NA	NA	NA	NA	NA	NA
comp130908_c0_seq1	len=206	-2.98661	-0.0392244	0.00064331	0.129389	NA	NA	NA	NA	NA	NA	NA
comp234590_c1_seq1	len=385	-3.25682	2.41158	0.00064989	0.130239	NA	NA	NA	NA	NA	NA	NA
comp241831_c0_seq1	len=339	-2.18831	2.13992	0.000655057	0.130591	NA	NA	NA	NA	NA	NA	NA
comp163864_c0_seq1	len=282	1.8659	-0.186047	0.000656364	0.130591	NA	NA	NA	NA	NA	NA	NA
comp214472_c1_seq1	len=390	-1.63765	1.10179	0.000662337	0.131307	NA	NA	NA	NA	NA	NA	NA
comp260974_c2_seq1	len=385	-2.36314	0.991426	0.000680119	0.13435	NA	NA	NA	NA	NA	NA	NA
comp198657_c0_seq1	len=223	2.24786	1.00517	0.000684319	0.134571	NA	NA	NA	NA	NA	NA	NA
comp320543_c0_seq1	len=225	2.88916	1.57501	0.000686103	0.134571	NA	NA	NA	NA	NA	NA	NA
comp253156_c4_seq1	len=484	1.68033	2.26345	0.000696982	0.13611	NA	NA	NA	NA	NA	NA	NA
comp239168_c0_seq1	len=393	1.88122	1.99729	0.000700056	0.13611	NA	NA	NA	NA	NA	NA	NA
comp258692_c0_seq1	len=364	2.23894	0.240024	0.000701331	0.13611	NA	NA	NA	NA	NA	NA	NA
comp238412_c0_seq1	len=481	1.30169	0.364855	0.00718781	0.611639	NA	NA	NA	NA	NA	NA	NA
comp260058_c0_seq2	len=347	2.70379	-0.171628	0.000722264	0.138472	NA	NA	NA	NA	NA	NA	NA
comp259541_c0_seq17	len=548	2.5482	1.84902	0.000722753	0.138472	NA	NA	NA	NA	NA	NA	NA
comp176535_c0_seq1	len=291	1.47115	1.06787	0.000723516	0.138472	NA	NA	NA	NA	NA	NA	NA
comp261126_c0_seq6	len=453	-3.19801	4.36411	0.000727698	0.138792	NA	NA	NA	NA	NA	NA	NA
comp241385_c0_seq1	len=630	2.44586	3.17926	0.000745606	0.141719	NA	NA	NA	NA	NA	NA	NA
comp254881_c1_seq6	len=1757	-2.18854	5.03491	0.000766838	0.145255	NA	NA	NA	NA	NA	NA	NA
comp264443_c0_seq1	len=390	1.95644	4.03115	0.000769532	0.145268	NA	NA	NA	NA	NA	NA	NA
comp242237_c0_seq1	len=400	-1.11542	1.09691	0.0166254	0.898774	NA	NA	NA	NA	NA	NA	NA
comp255723_c0_seq1	len=206	-2.14629	1.05854	0.000802986	0.150556	NA	NA	NA	NA	NA	NA	NA
comp135497_c1_seq1	len=397	1.1802	0.58077	0.0166395	0.898774	NA	NA	NA	NA	NA	NA	NA
comp260286_c1_seq1	len=205	2.57078	-0.0516605	0.000816094	0.151983	NA	NA	NA	NA	NA	NA	NA
comp222620_c0_seq1	len=323	1.86443	0.972556	0.00741396	0.619446	NA	NA	NA	NA	NA	NA	NA
comp265688_c0_seq1	len=225	-2.95441	2.78611	0.000850478	0.15719	NA	NA	NA	NA	NA	NA	NA
comp252043_c3_seq1	len=367	-2.11313	1.24466	0.00085258	0.15719	NA	NA	NA	NA	NA	NA	NA
comp346412_c0_seq1	len=266	2.77356	0.646396	0.000857874	0.157641	NA	NA	NA	NA	NA	NA	NA
comp236887_c0_seq1	len=1518	-2.97473	2.43791	0.000867145	0.158817	NA	NA	NA	NA	NA	NA	NA
comp154219_c0_seq1	len=282	-1.69131	0.627141	0.000870713	0.158944	NA	NA	NA	NA	NA	NA	NA
comp239785_c0_seq1	len=583	2.67114	3.04411	0.000878739	0.159881	NA	NA	NA	NA	NA	NA	NA
comp236618_c0_seq1	len=426	-2.37459	2.32824	0.000886795	0.160818	NA	NA	NA	NA	NA	NA	NA
comp238211_c0_seq1	len=737	2.41248	2.24139	0.000893102	0.160918	NA	NA	NA	NA	NA	NA	NA
comp256361_c0_seq1	len=1727	-2.90707	6.18195	0.000893167	0.160918	NA	NA	NA	NA	NA	NA	NA
comp173599_c0_seq1	len=250	1.83531	0.191079	0.00757238	0.623268	NA	NA	NA	NA	NA	NA	NA
comp246183_c0_seq1	len=224	-2.62769	0.187526	0.000912536	0.163344	NA	NA	NA	NA	NA	NA	NA
comp253606_c0_seq1	len=1844	1.70591	1.06743	0.00761977	0.625307	NA	NA	NA	NA	NA	NA	NA
comp241145_c0_seq1	len=453	1.81066	0.981013	0.00094873	0.168731	NA	NA	NA	NA	NA	NA	NA
comp258765_c2_seq10	len=222	-2.1278	-0.114562	0.00096758	0.171532	NA	NA	NA	NA	NA	NA	NA
comp182350_c0_seq1	len=390	-2.19217	2.21168	0.00771147	0.630028	NA	NA	NA	NA	NA	NA	NA
comp135894_c0_seq1	len=443	2.15409	0.142089	0.000977306	0.172152	NA	NA	NA	NA	NA	NA	NA
comp243810_c2_seq1	len=902	1.3737	3.08493	0.00776219	0.632304	NA	NA	NA	NA	NA	NA	NA
comp261169_c2_seq4	len=2537	-2.12624	-0.0909578	0.000998651	0.174268	NA	NA	NA	NA	NA	NA	NA
comp252129_c0_seq1	len=405	1.53093	2.7252	0.000998768	0.174268	NA	NA	NA	NA	NA	NA	NA
comp245082_c0_seq1	len=216	1.68284	0.893794	0.00100256	0.174379	NA	NA	NA	NA	NA	NA	NA
comp252404_c0_seq6	len=444	3.43494	1.72174	0.00100808	0.17479	NA	NA	NA	NA	NA	NA	NA
comp177903_c0_seq1	len=245	1.32942	0.371898	0.00785184	0.634931	NA	NA	NA	NA	NA	NA	NA
comp257186_c0_seq1	len=319	1.91159	1.4771	0.00105873	0.182428	NA	NA	NA	NA	NA	NA	NA
comp262331_c1_seq13	len=216	-1.96307	0.330755	0.00106431	0.182819	NA	NA	NA	NA	NA	NA	NA
comp245951_c0_seq1	len=644	2.16218	2.45219	0.00108101	0.185114	NA	NA	NA	NA	NA	NA	NA
comp505453_c0_seq1	len=289	2.31572	-0.161089	0.0011005	0.187869	NA	NA	NA	NA	NA	NA	NA
comp259413_c0_seq12	len=584	-2.51927	3.01771	0.00112404	0.191297	NA	NA	NA	NA	NA	NA	NA
comp259074_c0_seq7	len=251	2.06177	1.0878	0.00114616	0.194186	NA	NA	NA	NA	NA	NA	NA
comp259368_c1_seq4	len=681	1.72987	1.3372	0.00800586	0.640828	NA	NA	NA	NA	NA	NA	NA
comp177926_c0_seq1	len=421	2.09867	1.94876	0.00115352	0.194388	NA	NA	NA	NA	NA	NA	NA
comp257526_c4_seq2	len=759	-2.01369	0.991463	0.00115625	0.194388	NA	NA	NA	NA	NA	NA	NA
comp239865_c0_seq1	len=416	1.61182	1.38584	0.00806528	0.642794	NA	NA	NA	NA	NA	NA	NA
comp180885_c0_seq1	len=431	-2.07837	1.36265	0.00116768	0.195122	NA	NA	NA	NA	NA	NA	NA
comp258556_c3_seq8	len=1493	2.66633	4.26132	0.00117663	0.195845	NA	NA	NA	NA	NA	NA	NA
comp237304_c0_seq1	len=212	2.22729	2.37471	0.00117909	0.195845	NA	NA	NA	NA	NA	NA	NA
comp165480_c0_seq1	len=388	-2.67288	0.356362	0.00118336	0.195967	NA	NA	NA	NA	NA	NA	NA
comp240960_c0_seq1	len=683	-2.05669	1.00736	0.00119928	0.197936	NA	NA	NA	NA	NA	NA	NA
comp256311_c4_seq2	len=433	-1.78731	1.17405	0.00120241	0.197936	NA	NA	NA	NA	NA	NA	NA
comp235278_c0_seq1	len=223	-1.93643	0.367644	0.00121822	0.199304	NA	NA	NA	NA	NA	NA	NA
comp390064_c0_seq1	len=220	-1.63754	0.322866	0.00121945	0.199304	NA	NA	NA	NA	NA	NA	NA
comp260850_c0_seq1	len=2198	-1.99926	0.819338	0.00122153	0.199304	NA	NA	NA	NA	NA	NA	NA
comp260631_c0_seq3	len=437	2.31852	0.0607535	0.00122581	0.199414	NA	NA	NA	NA	NA	NA	NA
comp187694_c0_seq1	len=209	-2.40572	1.20897	0.00123029	0.199556	NA	NA	NA	NA	NA	NA	NA
comp227893_c0_seq1	len=303	-2.62487	0.535771	0.00125081	0.20229	NA	NA	NA	NA	NA	NA	NA
comp178313_c0_seq1	len=223	2.91275	0.00500087	0.00127253	0.205204	NA	NA	NA	NA	NA	NA	NA
comp179658_c0_seq1	len=202	-1.73859	0.285178	0.00127703	0.205332	NA	NA	NA	NA	NA	NA	NA
comp463257_c0_seq1	len=536	1.9036	0.808566	0.00128811	0.206511	NA	NA	NA	NA	NA	NA	NA
comp254593_c0_seq2	len=955	-1.31768	2.82787	0.00842958	0.656688	NA	NA	NA	NA	NA	NA	NA
comp222779_c0_seq1	len=482	1.87486	0.509534	0.00133278	0.211696	NA	NA	NA	NA	NA	NA	NA
comp166524_c0_seq1	len=402	-2.4868	2.61636	0.00133516	0.211696	NA	NA	NA	NA	NA	NA	NA
comp242538_c0_seq1	len=672	-1.37383	0.612137	0.0185071	0.950461	NA	NA	NA	NA	NA	NA	NA
comp234567_c0_seq1	len=1017	-3.63055	3.67037	0.00136846	0.21626	NA	NA	NA	NA	NA	NA	NA
comp248502_c1_seq1	len=457	-1.84207	0.835612	0.00137244	0.21627	NA	NA	NA	NA	NA	NA	NA
comp244625_c0_seq1	len=613	1.48299	0.508304	0.00139768	0.219622	NA	NA	NA	NA	NA	NA	NA
comp258445_c4_seq3	len=809	-2.76925	1.49232	0.00142826	0.223792	NA	NA	NA	NA	NA	NA	NA
comp143341_c0_seq1	len=302	2.01072	1.95897	0.00144992	0.226136	NA	NA	NA	NA	NA	NA	NA
comp187476_c0_seq1	len=300	2.76285	3.29987	0.00145262	0.226136	NA	NA	NA	NA	NA	NA	NA
comp220838_c0_seq1	len=227	2.01965	0.131652	0.0014562	0.226136	NA	NA	NA	NA	NA	NA	NA
comp260852_c1_seq1	len=432	-1.93319	1.78041	0.00145958	0.226136	NA	NA	NA	NA	NA	NA	NA
comp249482_c2_seq1	len=1158	-1.87016	2.63566	0.00867349	0.663032	NA	NA	NA	NA	NA	NA	NA
comp149394_c0_seq1	len=254	1.27071	1.02982	0.00867355	0.663032	NA	NA	NA	NA	NA	NA	NA
comp261929_c2_seq2	len=1648	-2.14148	1.7579	0.00150562	0.231325	NA	NA	NA	NA	NA	NA	NA
comp169856_c0_seq1	len=263	1.53594	1.20571	0.00151404	0.231975	NA	NA	NA	NA	NA	NA	NA
comp253711_c0_seq1	len=338	-2.43754	1.25099	0.00152896	0.233615	NA	NA	NA	NA	NA	NA	NA
comp529606_c0_seq1	len=507	2.28221	0.744882	0.00154881	0.235994	NA	NA	NA	NA	NA	NA	NA
comp238377_c3_seq1	len=236	-1.65652	0.175492	0.00155838	0.235994	NA	NA	NA	NA	NA	NA	NA
comp247855_c1_seq3	len=1002	-2.55158	2.38782	0.0191589	0.9684	NA	NA	NA	NA	NA	NA	NA
comp257492_c1_seq1	len=703	-1.87983	0.376871	0.00891203	0.675251	NA	NA	NA	NA	NA	NA	NA
comp257113_c0_seq1	len=322	-2.40821	0.756757	0.0015678	0.235994	NA	NA	NA	NA	NA	NA	NA
comp242057_c0_seq1	len=536	-1.85961	0.93715	0.00157013	0.235994	NA	NA	NA	NA	NA	NA	NA
comp232711_c1_seq1	len=470	-2.25819	1.86718	0.00158248	0.236585	NA	NA	NA	NA	NA	NA	NA
comp238673_c1_seq1	len=501	-1.64252	1.3341	0.00158262	0.236585	NA	NA	NA	NA	NA	NA	NA
comp220556_c0_seq1	len=424	1.93045	0.682482	0.00159079	0.237166	NA	NA	NA	NA	NA	NA	NA
comp217254_c0_seq1	len=325	-1.72337	1.5315	0.00160256	0.237661	NA	NA	NA	NA	NA	NA	NA
comp259002_c0_seq1	len=1545	-1.61709	0.452613	0.00160271	0.237661	NA	NA	NA	NA	NA	NA	NA
comp258968_c1_seq5	len=254	-2.14128	2.0745	0.00163022	0.241094	NA	NA	NA	NA	NA	NA	NA
comp248430_c2_seq1	len=315	1.72429	4.72994	0.00164614	0.242799	NA	NA	NA	NA	NA	NA	NA
comp185299_c0_seq1	len=470	1.80984	1.05976	0.00903477	0.6753	NA	NA	NA	NA	NA	NA	NA
comp259169_c1_seq7	len=514	-1.79861	3.23947	0.00908232	0.676525	NA	NA	NA	NA	NA	NA	NA
comp226171_c0_seq1	len=356	1.63215	0.10226	0.00173252	0.253511	NA	NA	NA	NA	NA	NA	NA
comp255429_c0_seq1	len=1032	-2.62317	5.91605	0.00173951	0.253863	NA	NA	NA	NA	NA	NA	NA
comp256619_c0_seq7	len=210	-1.84592	0.711529	0.00174683	0.25426	NA	NA	NA	NA	NA	NA	NA
comp254190_c0_seq2	len=812	-1.6559	5.6807	0.00912165	0.677218	NA	NA	NA	NA	NA	NA	NA
comp132429_c0_seq1	len=627	1.61291	1.41666	0.00177374	0.256825	NA	NA	NA	NA	NA	NA	NA
comp258952_c1_seq3	len=604	-2.65678	1.63363	0.00179477	0.258352	NA	NA	NA	NA	NA	NA	NA
comp257802_c0_seq2	len=213	1.94707	-0.189347	0.00179784	0.258352	NA	NA	NA	NA	NA	NA	NA
comp151009_c0_seq1	len=204	2.03105	2.20625	0.00179829	0.258352	NA	NA	NA	NA	NA	NA	NA
comp156812_c0_seq1	len=256	2.39691	3.97837	0.00183145	0.262434	NA	NA	NA	NA	NA	NA	NA
comp180885_c1_seq1	len=390	-1.76029	1.42863	0.00184503	0.263696	NA	NA	NA	NA	NA	NA	NA
comp244614_c0_seq3	len=601	-1.95496	1.62852	0.0018511	0.263881	NA	NA	NA	NA	NA	NA	NA
comp146968_c0_seq1	len=211	-2.08328	0.609285	0.00938312	0.688603	NA	NA	NA	NA	NA	NA	NA
comp242581_c0_seq1	len=1046	-1.85544	1.59457	0.00191217	0.27119	NA	NA	NA	NA	NA	NA	NA
comp161029_c0_seq1	len=258	2.355	2.02291	0.00192043	0.271665	NA	NA	NA	NA	NA	NA	NA
comp236699_c0_seq2	len=311	-2.18374	1.14816	0.00195272	0.275527	NA	NA	NA	NA	NA	NA	NA
comp445220_c0_seq1	len=416	-1.48898	1.10854	0.00951576	0.695279	NA	NA	NA	NA	NA	NA	NA
comp252805_c0_seq2	len=1318	2.79747	3.43844	0.00199536	0.280115	NA	NA	NA	NA	NA	NA	NA
comp240897_c0_seq1	len=525	2.54158	0.682179	0.00200297	0.280231	NA	NA	NA	NA	NA	NA	NA
comp488665_c0_seq1	len=275	1.26688	0.117532	0.0095779	0.696195	NA	NA	NA	NA	NA	NA	NA
comp200170_c0_seq1	len=245	2.03835	0.0165428	0.00205121	0.28578	NA	NA	NA	NA	NA	NA	NA
comp234466_c0_seq2	len=387	1.65689	0.55597	0.00206022	0.286313	NA	NA	NA	NA	NA	NA	NA
comp236901_c2_seq1	len=491	-1.20735	2.0367	0.00964353	0.699074	NA	NA	NA	NA	NA	NA	NA
comp231324_c0_seq1	len=739	-2.87851	7.38061	0.00970658	0.701925	NA	NA	NA	NA	NA	NA	NA
comp251412_c0_seq2	len=705	-2.20481	3.45865	0.00214751	0.296212	NA	NA	NA	NA	NA	NA	NA
comp177235_c0_seq1	len=219	1.55929	1.07289	0.00218199	0.300219	NA	NA	NA	NA	NA	NA	NA
comp234967_c1_seq1	len=383	1.29851	0.0234397	0.00975942	0.703785	NA	NA	NA	NA	NA	NA	NA
comp240179_c0_seq1	len=467	-1.56917	2.7995	0.00978458	0.704033	NA	NA	NA	NA	NA	NA	NA
comp149152_c0_seq1	len=446	-2.06262	0.598838	0.00222727	0.304179	NA	NA	NA	NA	NA	NA	NA
comp255702_c4_seq4	len=895	2.87345	-0.0768521	0.00227476	0.308269	NA	NA	NA	NA	NA	NA	NA
comp223339_c0_seq1	len=375	2.15266	1.06165	0.00227638	0.308269	NA	NA	NA	NA	NA	NA	NA
comp211100_c0_seq1	len=470	-2.94187	0.397974	0.0022775	0.308269	NA	NA	NA	NA	NA	NA	NA
comp239678_c0_seq1	len=445	-1.85166	2.24207	0.00986463	0.705851	NA	NA	NA	NA	NA	NA	NA
comp239898_c0_seq1	len=719	-2.86423	1.52908	0.00229454	0.309545	NA	NA	NA	NA	NA	NA	NA
comp259938_c1_seq1	len=710	1.74006	1.43904	0.00231373	0.311374	NA	NA	NA	NA	NA	NA	NA
comp255272_c2_seq2	len=1059	1.45248	0.708006	0.0206207	1	NA	NA	NA	NA	NA	NA	NA
comp212467_c0_seq1	len=1152	-2.29675	2.62848	0.00237455	0.317418	NA	NA	NA	NA	NA	NA	NA
comp254075_c0_seq1	len=2133	-1.49187	3.22571	0.00237585	0.317418	NA	NA	NA	NA	NA	NA	NA
comp259695_c0_seq2	len=764	2.29633	1.48267	0.00238275	0.317572	NA	NA	NA	NA	NA	NA	NA
comp259983_c4_seq1	len=999	-2.10929	3.67078	0.00239441	0.317785	NA	NA	NA	NA	NA	NA	NA
comp231121_c0_seq2	len=255	1.8892	0.171645	0.00239927	0.317785	NA	NA	NA	NA	NA	NA	NA
comp249479_c0_seq2	len=530	-1.82399	2.24869	0.00240813	0.317785	NA	NA	NA	NA	NA	NA	NA
comp250105_c0_seq1	len=1269	-1.60508	4.3911	0.00241282	0.317785	NA	NA	NA	NA	NA	NA	NA
comp244778_c0_seq2	len=555	-1.28563	1.31121	0.0209839	1	NA	NA	NA	NA	NA	NA	NA
comp254898_c10_seq4	len=410	-3.2974	3.66136	0.00245256	0.322218	NA	NA	NA	NA	NA	NA	NA
comp222312_c0_seq2	len=542	1.49806	1.63705	0.0101925	0.71725	NA	NA	NA	NA	NA	NA	NA
comp231785_c0_seq1	len=330	1.63583	2.9165	0.0102346	0.719136	NA	NA	NA	NA	NA	NA	NA
comp262525_c1_seq35	len=375	2.49494	1.01115	0.00248711	0.324445	NA	NA	NA	NA	NA	NA	NA
comp256385_c1_seq1	len=346	-2.00352	0.393702	0.00252414	0.327959	NA	NA	NA	NA	NA	NA	NA
comp243446_c0_seq3	len=588	-1.11293	1.82062	0.0213533	1	NA	NA	NA	NA	NA	NA	NA
comp234089_c0_seq2	len=203	2.58022	0.542959	0.00253308	0.32812	NA	NA	NA	NA	NA	NA	NA
comp198174_c0_seq1	len=249	1.51408	0.00373749	0.00259742	0.335668	NA	NA	NA	NA	NA	NA	NA
comp262061_c0_seq1	len=230	-1.51494	0.0855517	0.00262656	0.337925	NA	NA	NA	NA	NA	NA	NA
comp262487_c1_seq3	len=649	1.79254	0.748193	0.0026295	0.337925	NA	NA	NA	NA	NA	NA	NA
comp156957_c0_seq1	len=359	1.5373	0.839626	0.00263321	0.337925	NA	NA	NA	NA	NA	NA	NA
comp154956_c0_seq1	len=252	1.73458	0.113948	0.00264443	0.338578	NA	NA	NA	NA	NA	NA	NA
comp248875_c0_seq1	len=587	-1.65252	1.37153	0.00267486	0.341684	NA	NA	NA	NA	NA	NA	NA
comp261959_c0_seq1	len=885	-2.28755	1.1031	0.00269779	0.343819	NA	NA	NA	NA	NA	NA	NA
comp243941_c0_seq4	len=276	-1.53166	2.01373	0.00272575	0.346243	NA	NA	NA	NA	NA	NA	NA
comp143639_c1_seq1	len=295	2.57173	0.197848	0.0105305	0.728066	NA	NA	NA	NA	NA	NA	NA
comp253475_c0_seq2	len=748	1.42193	0.438209	0.021601	1	NA	NA	NA	NA	NA	NA	NA
comp263083_c0_seq1	len=314	2.3108	3.58627	0.00276386	0.347832	NA	NA	NA	NA	NA	NA	NA
comp218045_c0_seq1	len=290	1.52402	0.497463	0.00276649	0.347832	NA	NA	NA	NA	NA	NA	NA
comp259746_c0_seq3	len=583	1.11184	0.411168	0.0217446	1	NA	NA	NA	NA	NA	NA	NA
comp251837_c0_seq1	len=486	-1.80577	1.07347	0.00280104	0.350788	NA	NA	NA	NA	NA	NA	NA
comp256847_c3_seq1	len=261	1.24262	0.94522	0.0106865	0.732521	NA	NA	NA	NA	NA	NA	NA
comp254465_c1_seq1	len=235	1.27366	0.269904	0.0106876	0.732521	NA	NA	NA	NA	NA	NA	NA
comp259983_c2_seq10	len=644	-1.9732	2.12008	0.00283956	0.353736	NA	NA	NA	NA	NA	NA	NA
comp250784_c0_seq4	len=240	1.45019	0.600146	0.00284972	0.354204	NA	NA	NA	NA	NA	NA	NA
comp205909_c0_seq1	len=462	-1.45367	0.999922	0.0219631	1	NA	NA	NA	NA	NA	NA	NA
comp230874_c0_seq1	len=251	1.48962	0.646866	0.00287151	0.355315	NA	NA	NA	NA	NA	NA	NA
comp252214_c0_seq5	len=1099	-1.6057	2.42809	0.00288336	0.355986	NA	NA	NA	NA	NA	NA	NA
comp245049_c1_seq1	len=247	1.39844	0.220697	0.00290039	0.35729	NA	NA	NA	NA	NA	NA	NA
comp440654_c0_seq1	len=440	1.37036	0.606629	0.0108263	0.735641	NA	NA	NA	NA	NA	NA	NA
comp218811_c0_seq1	len=427	-1.97258	0.877943	0.00294266	0.36089	NA	NA	NA	NA	NA	NA	NA
comp237456_c0_seq1	len=348	-1.54253	0.892472	0.0029651	0.362837	NA	NA	NA	NA	NA	NA	NA
comp232197_c1_seq1	len=647	1.18202	1.12781	0.0221486	1	NA	NA	NA	NA	NA	NA	NA
comp238299_c1_seq1	len=537	-2.51625	1.44298	0.00306761	0.373728	NA	NA	NA	NA	NA	NA	NA
comp142608_c0_seq1	len=210	2.22364	0.289329	0.00307882	0.374269	NA	NA	NA	NA	NA	NA	NA
comp241245_c1_seq1	len=576	1.53092	1.71145	0.0109352	0.737603	NA	NA	NA	NA	NA	NA	NA
comp261378_c0_seq1	len=2510	-1.87783	1.58106	0.00309982	0.374576	NA	NA	NA	NA	NA	NA	NA
comp244772_c0_seq1	len=238	2.41555	0.399827	0.00310537	0.374576	NA	NA	NA	NA	NA	NA	NA
comp250757_c1_seq1	len=501	1.30203	2.35715	0.0110468	0.74242	NA	NA	NA	NA	NA	NA	NA
comp254032_c2_seq1	len=730	1.61345	2.9781	0.00312811	0.375665	NA	NA	NA	NA	NA	NA	NA
comp258971_c0_seq10	len=1242	-1.67283	3.12213	0.00313105	0.375665	NA	NA	NA	NA	NA	NA	NA
comp209007_c0_seq1	len=321	-1.5816	0.132015	0.0031487	0.376964	NA	NA	NA	NA	NA	NA	NA
comp141254_c0_seq1	len=328	1.47685	-0.0562072	0.00315751	0.377202	NA	NA	NA	NA	NA	NA	NA
comp258693_c1_seq1	len=593	-1.51417	1.40336	0.0031806	0.378688	NA	NA	NA	NA	NA	NA	NA
comp179746_c0_seq1	len=218	1.37851	2.00652	0.0225459	1	NA	NA	NA	NA	NA	NA	NA
comp255824_c3_seq1	len=327	1.97966	1.59576	0.00320251	0.379594	NA	NA	NA	NA	NA	NA	NA
comp261666_c8_seq1	len=523	1.56143	1.2583	0.0113422	0.754929	NA	NA	NA	NA	NA	NA	NA
comp248139_c2_seq1	len=301	1.25952	1.71967	0.0113751	0.75621	NA	NA	NA	NA	NA	NA	NA
comp179032_c0_seq1	len=476	2.60629	1.38048	0.00326218	0.384722	NA	NA	NA	NA	NA	NA	NA
comp231989_c0_seq1	len=571	1.34886	2.40578	0.00334231	0.393334	NA	NA	NA	NA	NA	NA	NA
comp129851_c0_seq1	len=218	1.56633	0.229652	0.00335973	0.394543	NA	NA	NA	NA	NA	NA	NA
comp246868_c0_seq2	len=388	-1.48291	1.1494	0.00340706	0.397989	NA	NA	NA	NA	NA	NA	NA
comp252692_c0_seq1	len=537	1.36037	1.97175	0.011617	0.76684	NA	NA	NA	NA	NA	NA	NA
comp237426_c0_seq1	len=325	-2.27849	1.96175	0.00341065	0.397989	NA	NA	NA	NA	NA	NA	NA
comp371689_c0_seq1	len=236	1.61166	0.227054	0.00344127	0.399018	NA	NA	NA	NA	NA	NA	NA
comp244275_c0_seq1	len=703	1.26731	1.63655	0.0343493	1	NA	NA	NA	NA	NA	NA	NA
comp245816_c0_seq2	len=788	1.4893	1.19966	0.00344584	0.399018	NA	NA	NA	NA	NA	NA	NA
comp258425_c1_seq1	len=222	2.12857	0.964265	0.00344833	0.399018	NA	NA	NA	NA	NA	NA	NA
comp246498_c0_seq4	len=460	1.30932	0.253529	0.0117509	0.769687	NA	NA	NA	NA	NA	NA	NA
comp142629_c0_seq1	len=303	-1.12725	0.641522	0.0231625	1	NA	NA	NA	NA	NA	NA	NA
comp235091_c0_seq1	len=530	1.20815	2.23948	0.0117587	0.769687	NA	NA	NA	NA	NA	NA	NA
comp213214_c0_seq1	len=206	-1.89337	1.00949	0.00353773	0.405558	NA	NA	NA	NA	NA	NA	NA
comp243575_c0_seq4	len=345	-1.62114	0.394077	0.0118511	0.77214	NA	NA	NA	NA	NA	NA	NA
comp254041_c4_seq1	len=325	1.91165	0.832844	0.00355344	0.405558	NA	NA	NA	NA	NA	NA	NA
comp253689_c1_seq1	len=516	-1.23765	2.29984	0.0118648	0.77214	NA	NA	NA	NA	NA	NA	NA
comp239059_c0_seq1	len=362	-2.39771	3.09331	0.00363997	0.41426	NA	NA	NA	NA	NA	NA	NA
comp260974_c2_seq5	len=289	2.73345	0.169726	0.00366141	0.415844	NA	NA	NA	NA	NA	NA	NA
comp238124_c0_seq2	len=421	2.30516	0.700467	0.00368758	0.417959	NA	NA	NA	NA	NA	NA	NA
comp201709_c2_seq1	len=409	1.56486	0.809259	0.00370746	0.418767	NA	NA	NA	NA	NA	NA	NA
comp208094_c0_seq1	len=330	1.0277	0.97567	0.0235811	1	NA	NA	NA	NA	NA	NA	NA
comp211748_c0_seq1	len=256	1.61453	0.290995	0.00371743	0.418767	NA	NA	NA	NA	NA	NA	NA
comp238940_c0_seq1	len=545	2.18382	1.58798	0.00373969	0.420418	NA	NA	NA	NA	NA	NA	NA
comp236677_c0_seq1	len=234	1.5843	1.27603	0.0120886	0.780199	NA	NA	NA	NA	NA	NA	NA
comp333547_c0_seq1	len=208	-1.24856	0.90399	0.0121461	0.780505	NA	NA	NA	NA	NA	NA	NA
comp220268_c0_seq1	len=397	1.12297	0.660987	0.046982	1	NA	NA	NA	NA	NA	NA	NA
comp222866_c0_seq1	len=202	1.61703	0.311437	0.00381673	0.42562	NA	NA	NA	NA	NA	NA	NA
comp222824_c0_seq1	len=298	1.3592	0.935572	0.00382652	0.425853	NA	NA	NA	NA	NA	NA	NA
comp261860_c1_seq1	len=298	-1.32525	0.566202	0.00384601	0.426953	NA	NA	NA	NA	NA	NA	NA
comp186932_c1_seq1	len=293	1.47193	0.0776425	0.00385786	0.426953	NA	NA	NA	NA	NA	NA	NA
comp260023_c1_seq1	len=1704	-1.53614	4.27772	0.00385956	0.426953	NA	NA	NA	NA	NA	NA	NA
comp244959_c0_seq1	len=1013	-1.29824	4.94796	0.0238868	1	NA	NA	NA	NA	NA	NA	NA
comp234529_c0_seq1	len=1090	-1.21313	3.3046	0.0123072	0.785887	NA	NA	NA	NA	NA	NA	NA
comp257547_c0_seq21	len=543	-1.59637	2.16214	0.0123188	0.785887	NA	NA	NA	NA	NA	NA	NA
comp306650_c0_seq1	len=244	1.63486	1.0599	0.00391197	0.429316	NA	NA	NA	NA	NA	NA	NA
comp299679_c0_seq1	len=213	2.37537	1.21607	0.023962	1	NA	NA	NA	NA	NA	NA	NA
comp243539_c0_seq1	len=422	-1.46374	1.99261	0.0039613	0.433011	NA	NA	NA	NA	NA	NA	NA
comp247695_c1_seq1	len=796	1.19879	1.43654	0.024023	1	NA	NA	NA	NA	NA	NA	NA
comp234091_c0_seq1	len=349	-1.52427	0.105004	0.00397963	0.433287	NA	NA	NA	NA	NA	NA	NA
comp239889_c0_seq1	len=255	-1.64272	1.70006	0.00398733	0.433287	NA	NA	NA	NA	NA	NA	NA
comp252506_c2_seq4	len=1144	-1.49486	3.52008	0.00404073	0.437376	NA	NA	NA	NA	NA	NA	NA
comp228119_c0_seq1	len=269	-1.99046	0.041792	0.00404077	0.437376	NA	NA	NA	NA	NA	NA	NA
comp253991_c0_seq3	len=954	-2.0195	1.3102	0.00410386	0.443337	NA	NA	NA	NA	NA	NA	NA
comp234708_c0_seq1	len=350	0.990789	0.432128	0.0355122	1	NA	NA	NA	NA	NA	NA	NA
comp258130_c0_seq1	len=342	-2.262	1.60365	0.00414463	0.44442	NA	NA	NA	NA	NA	NA	NA
comp220183_c0_seq1	len=371	-1.32332	1.14653	0.0126669	0.797066	NA	NA	NA	NA	NA	NA	NA
comp220292_c0_seq1	len=415	-1.88136	0.9014	0.00414602	0.44442	NA	NA	NA	NA	NA	NA	NA
comp261806_c4_seq2	len=633	-1.80554	2.90047	0.00419847	0.449172	NA	NA	NA	NA	NA	NA	NA
comp259701_c2_seq1	len=286	1.55069	0.986419	0.012749	0.798813	NA	NA	NA	NA	NA	NA	NA
comp232843_c0_seq1	len=234	-1.52643	0.326625	0.00422668	0.450446	NA	NA	NA	NA	NA	NA	NA
comp252214_c0_seq2	len=1171	-1.68269	2.71592	0.0127669	0.798813	NA	NA	NA	NA	NA	NA	NA
comp220362_c1_seq1	len=364	1.56848	1.81576	0.00428257	0.454377	NA	NA	NA	NA	NA	NA	NA
comp237365_c0_seq1	len=274	1.28918	1.67382	0.0128277	0.800807	NA	NA	NA	NA	NA	NA	NA
comp244268_c0_seq1	len=1873	1.384	5.78373	0.0128505	0.801325	NA	NA	NA	NA	NA	NA	NA
comp255920_c0_seq1	len=696	-2.00305	1.97432	0.00431298	0.455259	NA	NA	NA	NA	NA	NA	NA
comp256029_c0_seq7	len=530	1.25653	1.06013	0.0128803	0.801374	NA	NA	NA	NA	NA	NA	NA
comp241403_c1_seq3	len=484	-1.49767	0.771201	0.012927	0.803217	NA	NA	NA	NA	NA	NA	NA
comp236434_c1_seq1	len=343	-1.29271	0.518066	0.0245434	1	NA	NA	NA	NA	NA	NA	NA
comp258968_c1_seq15	len=1042	-2.03242	5.91689	0.00443647	0.464745	NA	NA	NA	NA	NA	NA	NA
comp233701_c1_seq1	len=704	1.53541	0.931425	0.00446073	0.46575	NA	NA	NA	NA	NA	NA	NA
comp259543_c0_seq1	len=422	-1.33634	1.52949	0.0130562	0.806445	NA	NA	NA	NA	NA	NA	NA
comp241773_c0_seq1	len=319	1.32256	-0.214532	0.0130777	0.806445	NA	NA	NA	NA	NA	NA	NA
comp256370_c2_seq1	len=546	2.47557	1.64797	0.00450581	0.46575	NA	NA	NA	NA	NA	NA	NA
comp255783_c1_seq2	len=550	2.35513	1.1363	0.00450869	0.46575	NA	NA	NA	NA	NA	NA	NA
comp260221_c6_seq2	len=474	-2.33981	1.3012	0.0131387	0.806445	NA	NA	NA	NA	NA	NA	NA
comp148485_c0_seq1	len=262	-1.52958	0.746651	0.00451687	0.46575	NA	NA	NA	NA	NA	NA	NA
comp383216_c0_seq1	len=283	-1.50305	0.335949	0.00451864	0.46575	NA	NA	NA	NA	NA	NA	NA
comp233166_c0_seq1	len=503	1.16153	3.24351	0.0131799	0.806445	NA	NA	NA	NA	NA	NA	NA
comp260697_c0_seq4	len=388	1.68305	2.44713	0.00454703	0.467474	NA	NA	NA	NA	NA	NA	NA
comp260548_c0_seq9	len=223	-1.81955	0.609119	0.00457551	0.469529	NA	NA	NA	NA	NA	NA	NA
comp236039_c0_seq1	len=556	1.82069	1.9727	0.00460197	0.47137	NA	NA	NA	NA	NA	NA	NA
comp258835_c1_seq2	len=527	1.72557	1.68865	0.00463252	0.473622	NA	NA	NA	NA	NA	NA	NA
comp139308_c0_seq1	len=204	1.81997	1.91905	0.00466209	0.475766	NA	NA	NA	NA	NA	NA	NA
comp452985_c0_seq1	len=273	2.14022	0.179917	0.00468111	0.47661	NA	NA	NA	NA	NA	NA	NA
comp248502_c0_seq3	len=539	-1.77825	1.93515	0.00469206	0.47661	NA	NA	NA	NA	NA	NA	NA
comp261998_c1_seq5	len=1876	1.21603	0.129052	0.0132648	0.806445	NA	NA	NA	NA	NA	NA	NA
comp233245_c0_seq1	len=858	-2.39889	2.02756	0.0047062	0.476749	NA	NA	NA	NA	NA	NA	NA
comp251963_c1_seq1	len=316	-1.32027	0.622838	0.0132899	0.80689	NA	NA	NA	NA	NA	NA	NA
comp261636_c0_seq2	len=526	1.65631	0.807529	0.00474151	0.477241	NA	NA	NA	NA	NA	NA	NA
comp239790_c0_seq1	len=261	1.26962	0.237995	0.013355	0.807899	NA	NA	NA	NA	NA	NA	NA
comp233780_c0_seq1	len=408	-1.63638	0.824401	0.00475003	0.477241	NA	NA	NA	NA	NA	NA	NA
comp256629_c5_seq3	len=580	-2.29449	2.22417	0.0133708	0.807899	NA	NA	NA	NA	NA	NA	NA
comp220754_c0_seq1	len=320	-1.03785	1.26032	0.0364589	1	NA	NA	NA	NA	NA	NA	NA
comp174410_c0_seq1	len=239	1.21978	0.790139	0.0134397	0.810645	NA	NA	NA	NA	NA	NA	NA
comp256578_c0_seq2	len=662	-1.95558	1.95577	0.00484509	0.483731	NA	NA	NA	NA	NA	NA	NA
comp255702_c1_seq1	len=334	1.31479	0.875124	0.00486135	0.48448	NA	NA	NA	NA	NA	NA	NA
comp258971_c0_seq9	len=532	1.45602	2.47173	0.00488906	0.485015	NA	NA	NA	NA	NA	NA	NA
comp255210_c2_seq14	len=498	1.4631	1.92433	0.0048904	0.485015	NA	NA	NA	NA	NA	NA	NA
comp261251_c5_seq2	len=573	-2.19981	2.36883	0.00489303	0.485015	NA	NA	NA	NA	NA	NA	NA
comp147715_c0_seq1	len=354	2.11063	1.65108	0.0049066	0.485162	NA	NA	NA	NA	NA	NA	NA
comp259138_c0_seq1	len=1953	1.68912	1.05384	0.00491205	0.485162	NA	NA	NA	NA	NA	NA	NA
comp271616_c0_seq1	len=357	1.7966	3.08145	0.0136327	0.815175	NA	NA	NA	NA	NA	NA	NA
comp247741_c1_seq2	len=367	-1.47584	1.53872	0.00496247	0.488397	NA	NA	NA	NA	NA	NA	NA
comp250727_c0_seq1	len=520	1.94121	2.03227	0.00497224	0.48849	NA	NA	NA	NA	NA	NA	NA
comp199479_c0_seq1	len=218	1.12418	0.828587	0.0258748	1	NA	NA	NA	NA	NA	NA	NA
comp254095_c0_seq1	len=299	-1.1665	1.42333	0.0137556	0.818986	NA	NA	NA	NA	NA	NA	NA
comp251840_c0_seq1	len=948	-1.75942	4.85542	0.00502337	0.49034	NA	NA	NA	NA	NA	NA	NA
comp256802_c0_seq3	len=1973	2.57849	0.304001	0.00502654	0.49034	NA	NA	NA	NA	NA	NA	NA
comp262018_c1_seq9	len=551	3.04323	0.204884	0.00506647	0.493365	NA	NA	NA	NA	NA	NA	NA
comp220140_c0_seq1	len=366	1.30694	1.27649	0.0139521	0.827124	NA	NA	NA	NA	NA	NA	NA
comp235945_c0_seq2	len=364	1.57191	0.857681	0.0050977	0.494664	NA	NA	NA	NA	NA	NA	NA
comp140200_c0_seq1	len=307	0.966833	0.915508	0.0372826	1	NA	NA	NA	NA	NA	NA	NA
comp237505_c0_seq1	len=348	-1.77832	0.895417	0.0373432	1	NA	NA	NA	NA	NA	NA	NA
comp232309_c0_seq1	len=648	1.47775	2.56968	0.00524972	0.506749	NA	NA	NA	NA	NA	NA	NA
comp253457_c1_seq1	len=229	1.45132	0.351729	0.00527394	0.506793	NA	NA	NA	NA	NA	NA	NA
comp248845_c0_seq2	len=204	-1.46979	0.336716	0.0052758	0.506793	NA	NA	NA	NA	NA	NA	NA
comp262452_c0_seq5	len=1157	-1.66067	1.35996	0.00528307	0.506793	NA	NA	NA	NA	NA	NA	NA
comp223573_c0_seq1	len=365	1.29661	0.334142	0.00528682	0.506793	NA	NA	NA	NA	NA	NA	NA
comp258713_c4_seq2	len=1655	-2.13662	0.169924	0.0053311	0.510153	NA	NA	NA	NA	NA	NA	NA
comp219032_c0_seq1	len=209	-1.87396	1.03846	0.0142854	0.837551	NA	NA	NA	NA	NA	NA	NA
comp223464_c0_seq1	len=588	-2.06909	0.696214	0.0142946	0.837551	NA	NA	NA	NA	NA	NA	NA
comp249164_c0_seq1	len=267	-2.48278	0.364821	0.00535975	0.510247	NA	NA	NA	NA	NA	NA	NA
comp215315_c0_seq1	len=251	1.60287	2.00904	0.0143814	0.840854	NA	NA	NA	NA	NA	NA	NA
comp243704_c1_seq1	len=402	-2.18295	3.41832	0.00548305	0.520194	NA	NA	NA	NA	NA	NA	NA
comp366859_c0_seq1	len=292	-1.85653	1.0039	0.0376795	1	NA	NA	NA	NA	NA	NA	NA
comp251942_c0_seq1	len=287	-1.6486	0.576751	0.00550389	0.520386	NA	NA	NA	NA	NA	NA	NA
comp236704_c0_seq1	len=211	1.32361	0.672802	0.00552676	0.521657	NA	NA	NA	NA	NA	NA	NA
comp141118_c0_seq1	len=246	-2.28199	1.04022	0.0146548	0.851355	NA	NA	NA	NA	NA	NA	NA
comp248393_c0_seq2	len=1752	1.15604	4.26315	0.0146693	0.851355	NA	NA	NA	NA	NA	NA	NA
comp253900_c0_seq9	len=652	1.94285	0.841878	0.00567175	0.532615	NA	NA	NA	NA	NA	NA	NA
comp254123_c0_seq1	len=347	-1.91829	1.39803	0.0056928	0.533686	NA	NA	NA	NA	NA	NA	NA
comp255844_c3_seq1	len=591	-3.06349	1.43677	0.00570974	0.534368	NA	NA	NA	NA	NA	NA	NA
comp259893_c0_seq2	len=483	-1.92311	4.42648	0.00576189	0.537753	NA	NA	NA	NA	NA	NA	NA
comp236109_c0_seq1	len=284	-2.65179	2.06433	0.00576535	0.537753	NA	NA	NA	NA	NA	NA	NA
comp252014_c1_seq3	len=229	0.971087	0.813615	0.0270998	1	NA	NA	NA	NA	NA	NA	NA
comp251890_c0_seq1	len=891	-1.75898	1.29673	0.00580987	0.540084	NA	NA	NA	NA	NA	NA	NA
comp254032_c1_seq2	len=700	1.46068	1.84592	0.00584958	0.542863	NA	NA	NA	NA	NA	NA	NA
comp240677_c0_seq1	len=2037	1.3015	3.27356	0.0148831	0.856606	NA	NA	NA	NA	NA	NA	NA
comp256109_c0_seq10	len=1088	-3.36611	4.34614	0.00590884	0.546528	NA	NA	NA	NA	NA	NA	NA
comp261891_c3_seq3	len=1828	-2.36654	2.24652	0.00592392	0.547009	NA	NA	NA	NA	NA	NA	NA
comp371883_c0_seq1	len=266	1.48739	0.483987	0.00596118	0.549531	NA	NA	NA	NA	NA	NA	NA
comp254804_c0_seq1	len=2512	1.70677	2.23036	0.00599042	0.550705	NA	NA	NA	NA	NA	NA	NA
comp252062_c1_seq1	len=688	1.31776	2.22926	0.00600074	0.550705	NA	NA	NA	NA	NA	NA	NA
comp254412_c3_seq2	len=541	1.75744	2.01292	0.0151716	0.867794	NA	NA	NA	NA	NA	NA	NA
comp237410_c0_seq1	len=907	-2.10922	1.82813	0.00605772	0.554732	NA	NA	NA	NA	NA	NA	NA
comp210643_c0_seq1	len=397	-1.42186	0.530465	0.00608916	0.55669	NA	NA	NA	NA	NA	NA	NA
comp213015_c1_seq1	len=266	-2.75952	1.14898	0.00614647	0.561002	NA	NA	NA	NA	NA	NA	NA
comp252695_c6_seq1	len=282	1.28104	1.25046	0.0153422	0.873503	NA	NA	NA	NA	NA	NA	NA
comp258299_c0_seq1	len=340	1.57574	1.00786	0.0062186	0.565719	NA	NA	NA	NA	NA	NA	NA
comp166334_c0_seq1	len=242	-3.52813	-0.298208	0.00629792	0.570651	NA	NA	NA	NA	NA	NA	NA
comp233256_c0_seq1	len=607	1.94812	3.31524	0.0062996	0.570651	NA	NA	NA	NA	NA	NA	NA
comp215311_c1_seq2	len=635	-1.3851	1.70222	0.00896362	0.6753	NA	NA	NA	NA	NA	NA	NA
comp131133_c0_seq1	len=419	-2.05867	2.05761	0.0155245	0.87949	NA	NA	NA	NA	NA	NA	NA
comp251000_c0_seq1	len=334	1.44623	0.592305	0.00636114	0.573965	NA	NA	NA	NA	NA	NA	NA
comp139536_c0_seq1	len=294	-1.32182	1.10655	0.015551	0.87949	NA	NA	NA	NA	NA	NA	NA
comp255210_c4_seq2	len=954	1.71478	2.8811	0.0063958	0.575216	NA	NA	NA	NA	NA	NA	NA
comp234863_c1_seq1	len=537	-1.91079	1.97651	0.0156702	0.884421	NA	NA	NA	NA	NA	NA	NA
comp225371_c0_seq1	len=321	1.23027	1.39194	0.0157052	0.885082	NA	NA	NA	NA	NA	NA	NA
comp256463_c0_seq5	len=341	1.46352	1.82988	0.00902931	0.6753	NA	NA	NA	NA	NA	NA	NA
comp244609_c5_seq1	len=285	-1.07584	0.655069	0.0275682	1	NA	NA	NA	NA	NA	NA	NA
comp251046_c0_seq5	len=259	1.59522	2.00455	0.00650012	0.579405	NA	NA	NA	NA	NA	NA	NA
comp187359_c0_seq1	len=270	-2.4236	2.53251	0.00650522	0.579405	NA	NA	NA	NA	NA	NA	NA
comp236753_c0_seq1	len=627	-1.8485	1.08453	0.00652542	0.580168	NA	NA	NA	NA	NA	NA	NA
comp212092_c0_seq1	len=335	-1.23935	0.750131	0.0277846	1	NA	NA	NA	NA	NA	NA	NA
comp185204_c0_seq1	len=245	1.44464	0.146075	0.00654526	0.580168	NA	NA	NA	NA	NA	NA	NA
comp247042_c0_seq1	len=491	1.27609	1.72616	0.00659151	0.582708	NA	NA	NA	NA	NA	NA	NA
comp217527_c0_seq2	len=670	-1.59879	2.06541	0.00659498	0.582708	NA	NA	NA	NA	NA	NA	NA
comp257758_c1_seq1	len=242	1.62791	0.186307	0.00660801	0.582928	NA	NA	NA	NA	NA	NA	NA
comp240975_c0_seq1	len=269	1.13188	0.795956	0.0159588	0.889324	NA	NA	NA	NA	NA	NA	NA
comp259593_c0_seq4	len=443	-1.86466	1.92325	0.00664606	0.583743	NA	NA	NA	NA	NA	NA	NA
comp256324_c0_seq1	len=248	-1.1662	0.78422	0.0160213	0.890621	NA	NA	NA	NA	NA	NA	NA
comp262430_c1_seq6	len=384	-1.10166	0.319753	0.027952	1	NA	NA	NA	NA	NA	NA	NA
comp262443_c0_seq2	len=648	-1.32465	1.82288	0.0160376	0.890621	NA	NA	NA	NA	NA	NA	NA
comp235607_c0_seq1	len=515	-1.54817	1.70386	0.0160874	0.892487	NA	NA	NA	NA	NA	NA	NA
comp259079_c0_seq1	len=1445	-1.29684	3.54293	0.0161405	0.892684	NA	NA	NA	NA	NA	NA	NA
comp245682_c1_seq1	len=299	1.29435	0.299205	0.0161447	0.892684	NA	NA	NA	NA	NA	NA	NA
comp254743_c4_seq5	len=939	-3.17262	3.47508	0.00673968	0.58613	NA	NA	NA	NA	NA	NA	NA
comp262389_c3_seq9	len=990	1.67944	1.99438	0.00675686	0.586701	NA	NA	NA	NA	NA	NA	NA
comp250528_c0_seq2	len=317	1.48756	0.254189	0.00677014	0.586933	NA	NA	NA	NA	NA	NA	NA
comp386442_c0_seq1	len=313	1.20844	0.570069	0.00682013	0.590342	NA	NA	NA	NA	NA	NA	NA
comp192581_c0_seq1	len=201	1.17408	0.193046	0.0162138	0.89323	NA	NA	NA	NA	NA	NA	NA
comp220790_c0_seq1	len=242	1.27872	1.04332	0.00689556	0.595009	NA	NA	NA	NA	NA	NA	NA
comp253032_c0_seq1	len=236	-1.47805	1.1829	0.00691265	0.595554	NA	NA	NA	NA	NA	NA	NA
comp244778_c1_seq1	len=436	-1.58474	0.413235	0.00695404	0.598188	NA	NA	NA	NA	NA	NA	NA
comp191348_c0_seq1	len=202	1.63553	5.51462	0.00696823	0.598478	NA	NA	NA	NA	NA	NA	NA
comp261914_c2_seq3	len=1569	1.34741	3.87312	0.00698909	0.599339	NA	NA	NA	NA	NA	NA	NA
comp251842_c1_seq7	len=1402	1.45626	4.13476	0.00705077	0.603692	NA	NA	NA	NA	NA	NA	NA
comp259444_c2_seq2	len=238	1.7411	0.844717	0.00707208	0.603717	NA	NA	NA	NA	NA	NA	NA
comp432028_c0_seq1	len=262	-1.61611	0.32916	0.00707289	0.603717	NA	NA	NA	NA	NA	NA	NA
comp238452_c0_seq1	len=631	-1.82896	1.59779	0.00714209	0.608684	NA	NA	NA	NA	NA	NA	NA
comp243422_c0_seq1	len=397	-1.5087	0.397722	0.0164691	0.898057	NA	NA	NA	NA	NA	NA	NA
comp221997_c0_seq1	len=341	1.57202	0.316006	0.01648	0.898057	NA	NA	NA	NA	NA	NA	NA
comp246924_c0_seq1	len=1210	3.92073	3.74803	0.00724233	0.613932	NA	NA	NA	NA	NA	NA	NA
comp215697_c0_seq1	len=660	-1.65692	0.71313	0.00724806	0.613932	NA	NA	NA	NA	NA	NA	NA
comp462916_c0_seq1	len=417	-1.27802	0.683113	0.00728566	0.615357	NA	NA	NA	NA	NA	NA	NA
comp261536_c0_seq5	len=555	-1.48054	1.7209	0.00728713	0.615357	NA	NA	NA	NA	NA	NA	NA
comp241804_c1_seq1	len=433	-1.75305	1.84001	0.00731684	0.615723	NA	NA	NA	NA	NA	NA	NA
comp262340_c0_seq1	len=715	-1.77147	0.574121	0.00732319	0.615723	NA	NA	NA	NA	NA	NA	NA
comp231558_c1_seq1	len=562	-1.29521	0.980325	0.0404738	1	NA	NA	NA	NA	NA	NA	NA
comp286479_c0_seq1	len=272	2.0153	1.55341	0.00736507	0.618163	NA	NA	NA	NA	NA	NA	NA
comp239321_c1_seq1	len=269	1.24365	1.56589	0.0405295	1	NA	NA	NA	NA	NA	NA	NA
comp231764_c0_seq1	len=486	3.19863	4.52053	0.00741322	0.619446	NA	NA	NA	NA	NA	NA	NA
comp260025_c0_seq3	len=715	-1.23094	2.90237	0.0167011	0.900347	NA	NA	NA	NA	NA	NA	NA
comp241726_c0_seq1	len=633	-1.76638	0.727259	0.00743597	0.620348	NA	NA	NA	NA	NA	NA	NA
comp218970_c0_seq1	len=255	-1.29478	0.262377	0.00745918	0.621348	NA	NA	NA	NA	NA	NA	NA
comp249147_c0_seq2	len=594	1.95892	0.269103	0.00749723	0.622518	NA	NA	NA	NA	NA	NA	NA
comp233915_c0_seq1	len=564	1.18637	3.39687	0.00751742	0.622518	NA	NA	NA	NA	NA	NA	NA
comp258782_c1_seq1	len=766	2.1153	1.36601	0.00751811	0.622518	NA	NA	NA	NA	NA	NA	NA
comp258417_c1_seq1	len=368	-1.46948	1.27606	0.00752386	0.622518	NA	NA	NA	NA	NA	NA	NA
comp255294_c1_seq1	len=1208	-1.87143	2.52163	0.00752951	0.622518	NA	NA	NA	NA	NA	NA	NA
comp243884_c0_seq1	len=356	-1.11789	2.33162	0.029391	1	NA	NA	NA	NA	NA	NA	NA
comp205320_c0_seq1	len=548	-1.5457	1.62392	0.0169759	0.907201	NA	NA	NA	NA	NA	NA	NA
comp197716_c0_seq1	len=515	1.10908	1.42048	0.0295371	1	NA	NA	NA	NA	NA	NA	NA
comp257869_c0_seq3	len=339	1.45778	0.16096	0.00761406	0.625307	NA	NA	NA	NA	NA	NA	NA
comp246692_c1_seq1	len=821	-1.3162	2.12771	0.0171319	0.911512	NA	NA	NA	NA	NA	NA	NA
comp256387_c0_seq5	len=421	1.57874	0.730246	0.00764791	0.626686	NA	NA	NA	NA	NA	NA	NA
comp168495_c0_seq1	len=234	1.23273	0.858069	0.00768952	0.629165	NA	NA	NA	NA	NA	NA	NA
comp223969_c0_seq1	len=251	1.18938	1.24673	0.017175	0.912164	NA	NA	NA	NA	NA	NA	NA
comp220365_c0_seq1	len=793	2.15283	1.92625	0.00774907	0.632167	NA	NA	NA	NA	NA	NA	NA
comp240265_c0_seq2	len=588	-1.31594	0.784942	0.0172122	0.912777	NA	NA	NA	NA	NA	NA	NA
comp260070_c2_seq5	len=558	1.60712	1.51904	0.00780653	0.633849	NA	NA	NA	NA	NA	NA	NA
comp142509_c0_seq1	len=202	1.33257	0.023368	0.00781583	0.633849	NA	NA	NA	NA	NA	NA	NA
comp258031_c0_seq8	len=225	2.00856	4.70112	0.0172642	0.912907	NA	NA	NA	NA	NA	NA	NA
comp231025_c1_seq1	len=380	-1.3502	0.75313	0.0173236	0.915172	NA	NA	NA	NA	NA	NA	NA
comp237833_c0_seq1	len=258	1.02626	0.0249548	0.0410537	1	NA	NA	NA	NA	NA	NA	NA
comp255970_c1_seq6	len=1103	-1.83483	0.396155	0.0299143	1	NA	NA	NA	NA	NA	NA	NA
comp220073_c1_seq1	len=570	1.71539	0.89678	0.00790275	0.637185	NA	NA	NA	NA	NA	NA	NA
comp219844_c1_seq1	len=549	1.54209	1.22181	0.0174452	0.91684	NA	NA	NA	NA	NA	NA	NA
comp259215_c0_seq1	len=1855	-1.65588	6.33604	0.00797136	0.640522	NA	NA	NA	NA	NA	NA	NA
comp202850_c0_seq1	len=281	1.33939	2.17546	0.00797887	0.640522	NA	NA	NA	NA	NA	NA	NA
comp261643_c3_seq3	len=232	-1.87196	0.584654	0.0174712	0.91684	NA	NA	NA	NA	NA	NA	NA
comp234490_c0_seq1	len=361	0.997629	0.753343	0.0300686	1	NA	NA	NA	NA	NA	NA	NA
comp253165_c0_seq1	len=979	-2.16452	0.739285	0.00803685	0.642379	NA	NA	NA	NA	NA	NA	NA
comp217795_c0_seq1	len=415	-2.45027	0.19118	0.00805592	0.642794	NA	NA	NA	NA	NA	NA	NA
comp231573_c2_seq1	len=440	-1.44542	0.355746	0.0177283	0.925625	NA	NA	NA	NA	NA	NA	NA
comp246819_c1_seq2	len=953	1.51508	4.16279	0.00809465	0.643969	NA	NA	NA	NA	NA	NA	NA
comp257291_c3_seq2	len=628	1.53841	0.961583	0.00810331	0.643969	NA	NA	NA	NA	NA	NA	NA
comp241355_c0_seq1	len=205	1.47293	0.101006	0.00812733	0.644951	NA	NA	NA	NA	NA	NA	NA
comp245439_c0_seq1	len=463	-1.55528	2.30055	0.00816678	0.647153	NA	NA	NA	NA	NA	NA	NA
comp242876_c0_seq1	len=480	-1.48549	1.37124	0.00819171	0.647529	NA	NA	NA	NA	NA	NA	NA
comp255210_c2_seq6	len=595	-1.70275	3.36074	0.00821306	0.647529	NA	NA	NA	NA	NA	NA	NA
comp243050_c0_seq1	len=439	-1.09133	0.436518	0.0305394	1	NA	NA	NA	NA	NA	NA	NA
comp258765_c2_seq9	len=364	1.24132	1.34249	0.00821835	0.647529	NA	NA	NA	NA	NA	NA	NA
comp261088_c0_seq3	len=219	1.41926	1.96632	0.00823821	0.64817	NA	NA	NA	NA	NA	NA	NA
comp211211_c0_seq1	len=391	1.22963	0.873343	0.00830961	0.65277	NA	NA	NA	NA	NA	NA	NA
comp198763_c0_seq1	len=234	1.30447	0.31818	0.00832027	0.65277	NA	NA	NA	NA	NA	NA	NA
comp189204_c0_seq1	len=508	2.00579	3.66234	0.0083348	0.652983	NA	NA	NA	NA	NA	NA	NA
comp256999_c1_seq4	len=461	-1.72464	0.0150175	0.00835075	0.653307	NA	NA	NA	NA	NA	NA	NA
comp223085_c0_seq1	len=391	1.52013	1.2496	0.00839612	0.655929	NA	NA	NA	NA	NA	NA	NA
comp260008_c6_seq2	len=743	-1.49136	2.01485	0.008421	0.656688	NA	NA	NA	NA	NA	NA	NA
comp176876_c0_seq1	len=318	1.78042	1.2625	0.0183735	0.946237	NA	NA	NA	NA	NA	NA	NA
comp240769_c0_seq1	len=404	1.18642	1.54268	0.0184162	0.94755	NA	NA	NA	NA	NA	NA	NA
comp254537_c3_seq2	len=844	1.63302	1.44077	0.00848149	0.658876	NA	NA	NA	NA	NA	NA	NA
comp254743_c0_seq11	len=877	-1.79411	2.12848	0.0309324	1	NA	NA	NA	NA	NA	NA	NA
comp257186_c1_seq1	len=520	1.31408	0.923031	0.0185632	0.952035	NA	NA	NA	NA	NA	NA	NA
comp258414_c0_seq2	len=289	1.81968	0.289782	0.00855005	0.661415	NA	NA	NA	NA	NA	NA	NA
comp200566_c0_seq1	len=310	1.38433	0.29989	0.0186571	0.955505	NA	NA	NA	NA	NA	NA	NA
comp241070_c0_seq2	len=649	1.61086	1.6483	0.0186922	0.956416	NA	NA	NA	NA	NA	NA	NA
comp231789_c0_seq1	len=849	-1.27072	1.47487	0.00863228	0.663032	NA	NA	NA	NA	NA	NA	NA
comp253891_c1_seq1	len=261	-1.33252	0.427074	0.00864069	0.663032	NA	NA	NA	NA	NA	NA	NA
comp209187_c1_seq1	len=404	-1.35909	0.898451	0.00864457	0.663032	NA	NA	NA	NA	NA	NA	NA
comp217277_c0_seq1	len=376	-1.3901	1.63874	0.00866576	0.663032	NA	NA	NA	NA	NA	NA	NA
comp254452_c0_seq1	len=1411	-1.08541	2.74172	0.0312324	1	NA	NA	NA	NA	NA	NA	NA
comp251727_c1_seq1	len=759	-1.06959	2.72558	0.0312597	1	NA	NA	NA	NA	NA	NA	NA
comp231057_c0_seq1	len=745	1.54905	4.19819	0.00867883	0.663032	NA	NA	NA	NA	NA	NA	NA
comp213214_c1_seq1	len=288	-1.75729	0.53012	0.00869967	0.663707	NA	NA	NA	NA	NA	NA	NA
comp223421_c1_seq1	len=631	1.2554	2.0095	0.0189176	0.95959	NA	NA	NA	NA	NA	NA	NA
comp251518_c2_seq2	len=304	1.81769	1.20502	0.00879745	0.66932	NA	NA	NA	NA	NA	NA	NA
comp255414_c2_seq21	len=674	1.32301	3.48498	0.00883916	0.67157	NA	NA	NA	NA	NA	NA	NA
comp237949_c0_seq2	len=288	-1.03538	0.274984	0.0314594	1	NA	NA	NA	NA	NA	NA	NA
comp179162_c0_seq1	len=273	1.22476	0.655131	0.0191694	0.9684	NA	NA	NA	NA	NA	NA	NA
comp248118_c0_seq1	len=917	1.95978	0.172754	0.0191716	0.9684	NA	NA	NA	NA	NA	NA	NA
comp262011_c5_seq1	len=676	1.87136	1.84394	0.0119523	0.775023	NA	NA	NA	NA	NA	NA	NA
comp261090_c0_seq1	len=232	-1.89658	1.96004	0.00897696	0.6753	NA	NA	NA	NA	NA	NA	NA
comp250663_c0_seq2	len=983	-1.71435	3.04302	0.00900568	0.6753	NA	NA	NA	NA	NA	NA	NA
comp262276_c0_seq10	len=710	-1.45425	0.59027	0.0090135	0.6753	NA	NA	NA	NA	NA	NA	NA
comp142952_c0_seq1	len=223	2.08019	1.43058	0.00901439	0.6753	NA	NA	NA	NA	NA	NA	NA
comp253004_c0_seq1	len=1348	-1.78454	0.680871	0.00901511	0.6753	NA	NA	NA	NA	NA	NA	NA
comp254704_c3_seq1	len=348	-1.63494	1.94431	0.00902342	0.6753	NA	NA	NA	NA	NA	NA	NA
comp255556_c1_seq3	len=784	1.40351	1.00756	0.0121515	0.780505	NA	NA	NA	NA	NA	NA	NA
comp244798_c0_seq1	len=524	-1.18031	1.13418	0.0196537	0.984659	NA	NA	NA	NA	NA	NA	NA
comp189144_c0_seq1	len=265	-1.13288	0.612338	0.019709	0.986114	NA	NA	NA	NA	NA	NA	NA
comp256553_c0_seq3	len=293	1.27362	1.15691	0.00908433	0.676525	NA	NA	NA	NA	NA	NA	NA
comp218378_c1_seq1	len=333	-1.19776	1.45847	0.0197383	0.986114	NA	NA	NA	NA	NA	NA	NA
comp229919_c0_seq1	len=210	-1.4422	0.527959	0.00911729	0.677218	NA	NA	NA	NA	NA	NA	NA
comp246659_c0_seq2	len=744	-2.19689	0.925036	0.0198222	0.98781	NA	NA	NA	NA	NA	NA	NA
comp236570_c0_seq1	len=333	-1.33624	0.555359	0.00915207	0.678566	NA	NA	NA	NA	NA	NA	NA
comp149637_c0_seq1	len=304	1.34637	2.20256	0.00916443	0.678572	NA	NA	NA	NA	NA	NA	NA
comp250373_c0_seq1	len=567	-2.06954	1.89841	0.00918198	0.678963	NA	NA	NA	NA	NA	NA	NA
comp222530_c0_seq1	len=286	1.88975	0.661853	0.00930138	0.686246	NA	NA	NA	NA	NA	NA	NA
comp259591_c4_seq2	len=940	-1.54156	2.45572	0.00930529	0.686246	NA	NA	NA	NA	NA	NA	NA
comp236281_c0_seq2	len=690	-2.17093	0.927585	0.0199415	0.988771	NA	NA	NA	NA	NA	NA	NA
comp180771_c0_seq1	len=263	1.76788	0.899786	0.00937885	0.688603	NA	NA	NA	NA	NA	NA	NA
comp253718_c0_seq1	len=405	1.35029	1.52255	0.0200253	0.988771	NA	NA	NA	NA	NA	NA	NA
comp272083_c0_seq1	len=230	-1.1263	1.41964	0.0321334	1	NA	NA	NA	NA	NA	NA	NA
comp129639_c0_seq1	len=290	1.50308	0.625801	0.00946684	0.693537	NA	NA	NA	NA	NA	NA	NA
comp261195_c0_seq6	len=259	1.48162	1.91821	0.00949424	0.694624	NA	NA	NA	NA	NA	NA	NA
comp250757_c0_seq1	len=834	1.18894	3.23439	0.0200633	0.988771	NA	NA	NA	NA	NA	NA	NA
comp252670_c1_seq1	len=312	-1.32649	1.29173	0.00953339	0.695648	NA	NA	NA	NA	NA	NA	NA
comp249482_c3_seq1	len=645	-1.59249	2.03347	0.020099	0.988771	NA	NA	NA	NA	NA	NA	NA
comp225511_c0_seq1	len=332	-1.09074	1.64677	0.0323544	1	NA	NA	NA	NA	NA	NA	NA
comp180603_c0_seq1	len=255	1.27878	0.452569	0.00957864	0.696195	NA	NA	NA	NA	NA	NA	NA
comp262329_c1_seq2	len=749	-1.87408	2.4342	0.00963819	0.699074	NA	NA	NA	NA	NA	NA	NA
comp140753_c0_seq1	len=230	-1.23855	0.383731	0.0202183	0.992277	NA	NA	NA	NA	NA	NA	NA
comp244492_c0_seq1	len=836	1.47354	4.30356	0.0202748	0.994165	NA	NA	NA	NA	NA	NA	NA
comp228562_c0_seq1	len=253	1.24181	1.06604	0.00970824	0.701925	NA	NA	NA	NA	NA	NA	NA
comp146579_c0_seq1	len=518	-1.54927	0.24773	0.00972802	0.702437	NA	NA	NA	NA	NA	NA	NA
comp258510_c1_seq1	len=433	-1.3141	1.53214	0.0203556	0.994842	NA	NA	NA	NA	NA	NA	NA
comp274964_c0_seq1	len=329	1.43574	1.57437	0.0203972	0.994842	NA	NA	NA	NA	NA	NA	NA
comp213968_c0_seq1	len=371	1.7845	0.568504	0.00979501	0.704033	NA	NA	NA	NA	NA	NA	NA
comp258362_c0_seq1	len=940	1.40398	1.86184	0.00980103	0.704033	NA	NA	NA	NA	NA	NA	NA
comp257177_c0_seq9	len=1008	1.44329	0.405487	0.00983204	0.705344	NA	NA	NA	NA	NA	NA	NA
comp255136_c1_seq1	len=290	1.24623	0.426043	0.0204496	0.994842	NA	NA	NA	NA	NA	NA	NA
comp250254_c0_seq1	len=556	1.27781	1.01876	0.0204571	0.994842	NA	NA	NA	NA	NA	NA	NA
comp185995_c0_seq1	len=354	-1.11811	0.673969	0.0327749	1	NA	NA	NA	NA	NA	NA	NA
comp232948_c0_seq1	len=381	1.21792	0.536171	0.00999665	0.713451	NA	NA	NA	NA	NA	NA	NA
comp249657_c1_seq1	len=1802	-1.23449	2.46927	0.0328554	1	NA	NA	NA	NA	NA	NA	NA
comp177514_c0_seq1	len=204	1.43519	0.304049	0.0100467	0.714195	NA	NA	NA	NA	NA	NA	NA
comp216615_c0_seq1	len=247	3.08792	4.09843	0.0100708	0.714195	NA	NA	NA	NA	NA	NA	NA
comp217750_c0_seq1	len=371	1.24862	0.906969	0.0100736	0.714195	NA	NA	NA	NA	NA	NA	NA
comp219429_c0_seq1	len=266	1.53168	1.11612	0.0208766	1	NA	NA	NA	NA	NA	NA	NA
comp288410_c0_seq1	len=270	2.7125	2.77598	0.0100924	0.714195	NA	NA	NA	NA	NA	NA	NA
comp255756_c0_seq2	len=1203	-2.52487	2.24201	0.0100975	0.714195	NA	NA	NA	NA	NA	NA	NA
comp260703_c0_seq1	len=272	1.12445	0.77404	0.0209149	1	NA	NA	NA	NA	NA	NA	NA
comp160396_c0_seq1	len=290	1.18909	5.60279	0.0443768	1	NA	NA	NA	NA	NA	NA	NA
comp234838_c0_seq1	len=207	1.31412	0.114465	0.0210456	1	NA	NA	NA	NA	NA	NA	NA
comp261948_c0_seq5	len=4225	-1.19098	1.81685	0.0210522	1	NA	NA	NA	NA	NA	NA	NA
comp252097_c1_seq1	len=1823	-1.34742	1.61649	0.0211877	1	NA	NA	NA	NA	NA	NA	NA
comp258207_c0_seq1	len=343	1.22638	0.967036	0.0330733	1	NA	NA	NA	NA	NA	NA	NA
comp227911_c0_seq1	len=398	2.09318	-0.0048833	0.0102755	0.720338	NA	NA	NA	NA	NA	NA	NA
comp246714_c2_seq1	len=1008	1.0164	1.66016	0.0331139	1	NA	NA	NA	NA	NA	NA	NA
comp247678_c0_seq2	len=1342	1.9281	2.65639	0.0103344	0.722637	NA	NA	NA	NA	NA	NA	NA
comp245614_c0_seq1	len=654	-1.7231	3.023	0.0103515	0.72292	NA	NA	NA	NA	NA	NA	NA
comp254321_c1_seq1	len=309	-1.20939	0.855373	0.0213883	1	NA	NA	NA	NA	NA	NA	NA
comp188032_c0_seq1	len=734	1.59141	2.74094	0.0104755	0.728066	NA	NA	NA	NA	NA	NA	NA
comp219361_c0_seq1	len=204	1.62434	-0.110395	0.0104787	0.728066	NA	NA	NA	NA	NA	NA	NA
comp229310_c0_seq1	len=491	1.44749	1.00912	0.0104911	0.728066	NA	NA	NA	NA	NA	NA	NA
comp143061_c0_seq1	len=217	2.21356	0.604439	0.0104939	0.728066	NA	NA	NA	NA	NA	NA	NA
comp255072_c0_seq3	len=399	1.56155	2.01385	0.0105045	0.728066	NA	NA	NA	NA	NA	NA	NA
comp231500_c0_seq1	len=590	2.48064	1.01215	0.0105185	0.728066	NA	NA	NA	NA	NA	NA	NA
comp219272_c0_seq1	len=407	-1.21479	0.680301	0.0215793	1	NA	NA	NA	NA	NA	NA	NA
comp250274_c2_seq2	len=371	1.06697	0.887352	0.0333018	1	NA	NA	NA	NA	NA	NA	NA
comp246975_c0_seq1	len=394	-1.27423	0.889311	0.0105664	0.728665	NA	NA	NA	NA	NA	NA	NA
comp262581_c1_seq9	len=287	-1.28969	0.357811	0.0105878	0.728665	NA	NA	NA	NA	NA	NA	NA
comp203202_c0_seq1	len=228	-1.30811	0.863629	0.0334049	1	NA	NA	NA	NA	NA	NA	NA
comp209372_c0_seq1	len=383	-1.23018	0.712016	0.0106737	0.732521	NA	NA	NA	NA	NA	NA	NA
comp245359_c0_seq3	len=241	1.70672	0.53546	0.0217932	1	NA	NA	NA	NA	NA	NA	NA
comp261764_c1_seq1	len=292	1.24747	4.31995	0.0217949	1	NA	NA	NA	NA	NA	NA	NA
comp259121_c1_seq3	len=293	-2.31128	1.87273	0.0107216	0.733396	NA	NA	NA	NA	NA	NA	NA
comp220540_c0_seq1	len=987	-2.11556	2.39292	0.0107269	0.733396	NA	NA	NA	NA	NA	NA	NA
comp254349_c0_seq2	len=307	-1.10882	0.888385	0.0334666	1	NA	NA	NA	NA	NA	NA	NA
comp254926_c0_seq4	len=349	1.26854	1.71705	0.021975	1	NA	NA	NA	NA	NA	NA	NA
comp229991_c0_seq1	len=400	-1.36291	0.173346	0.026118	1	NA	NA	NA	NA	NA	NA	NA
comp251735_c0_seq2	len=1371	1.35603	0.310602	0.0220051	1	NA	NA	NA	NA	NA	NA	NA
comp246637_c0_seq4	len=1306	-1.90823	2.7974	0.0335634	1	NA	NA	NA	NA	NA	NA	NA
comp254414_c1_seq1	len=1488	1.50856	3.53754	0.0108736	0.737419	NA	NA	NA	NA	NA	NA	NA
comp198773_c0_seq1	len=575	-1.23431	1.61284	0.0108854	0.737419	NA	NA	NA	NA	NA	NA	NA
comp252784_c0_seq1	len=1977	-1.41246	1.62661	0.0337027	1	NA	NA	NA	NA	NA	NA	NA
comp258135_c0_seq2	len=1100	1.22491	3.23627	0.0221599	1	NA	NA	NA	NA	NA	NA	NA
comp176445_c0_seq1	len=482	1.3769	1.14202	0.0109301	0.737603	NA	NA	NA	NA	NA	NA	NA
comp256189_c0_seq2	len=1163	-1.14854	2.4376	0.0222453	1	NA	NA	NA	NA	NA	NA	NA
comp252043_c2_seq1	len=306	2.49383	0.737541	0.0110294	0.742308	NA	NA	NA	NA	NA	NA	NA
comp256897_c8_seq1	len=259	-1.39764	0.353336	0.0110318	0.742308	NA	NA	NA	NA	NA	NA	NA
comp187096_c0_seq1	len=270	1.07032	0.382987	0.0339458	1	NA	NA	NA	NA	NA	NA	NA
comp147739_c0_seq1	len=412	1.58574	3.07082	0.0223515	1	NA	NA	NA	NA	NA	NA	NA
comp203937_c0_seq1	len=480	1.66124	3.08564	0.0111353	0.74655	NA	NA	NA	NA	NA	NA	NA
comp259326_c0_seq1	len=371	1.40743	3.69291	0.0224122	1	NA	NA	NA	NA	NA	NA	NA
comp220302_c0_seq1	len=492	-1.17629	1.15494	0.0112267	0.750517	NA	NA	NA	NA	NA	NA	NA
comp244585_c2_seq1	len=240	1.35614	0.519993	0.0112359	0.750517	NA	NA	NA	NA	NA	NA	NA
comp258575_c0_seq6	len=525	1.04607	1.80107	0.0457147	1	NA	NA	NA	NA	NA	NA	NA
comp258246_c3_seq1	len=270	-1.41939	0.733166	0.0226106	1	NA	NA	NA	NA	NA	NA	NA
comp259961_c0_seq25	len=330	1.67502	2.36596	0.0226991	1	NA	NA	NA	NA	NA	NA	NA
comp175296_c0_seq1	len=727	-1.44159	0.65924	0.0227361	1	NA	NA	NA	NA	NA	NA	NA
comp214799_c0_seq1	len=458	-1.65255	0.565218	0.0114101	0.757627	NA	NA	NA	NA	NA	NA	NA
comp243282_c0_seq2	len=603	1.62815	0.525784	0.0114803	0.761375	NA	NA	NA	NA	NA	NA	NA
comp258895_c0_seq6	len=528	1.22813	2.0491	0.0115384	0.763771	NA	NA	NA	NA	NA	NA	NA
comp290528_c0_seq1	len=218	1.79729	1.64849	0.011544	0.763771	NA	NA	NA	NA	NA	NA	NA
comp259392_c0_seq3	len=605	-1.72739	0.0665617	0.0228927	1	NA	NA	NA	NA	NA	NA	NA
comp231255_c0_seq1	len=267	-1.64432	-2.92e-05	0.011627	0.76684	NA	NA	NA	NA	NA	NA	NA
comp239085_c1_seq1	len=434	1.18117	1.93124	0.011632	0.76684	NA	NA	NA	NA	NA	NA	NA
comp251163_c0_seq1	len=1151	-1.28209	2.36459	0.0462034	1	NA	NA	NA	NA	NA	NA	NA
comp235771_c0_seq1	len=203	1.36416	0.744723	0.0117188	0.769687	NA	NA	NA	NA	NA	NA	NA
comp220362_c0_seq1	len=287	1.38223	1.51178	0.0117344	0.769687	NA	NA	NA	NA	NA	NA	NA
comp250077_c0_seq1	len=496	-1.11409	1.27157	0.0230404	1	NA	NA	NA	NA	NA	NA	NA
comp248808_c2_seq1	len=285	-1.0347	0.554854	0.0344374	1	NA	NA	NA	NA	NA	NA	NA
comp234358_c0_seq1	len=249	-1.42542	0.393437	0.0232373	1	NA	NA	NA	NA	NA	NA	NA
comp254791_c1_seq1	len=899	-2.17474	2.47662	0.011851	0.77214	NA	NA	NA	NA	NA	NA	NA
comp177634_c0_seq1	len=419	-1.07661	1.7069	0.0232585	1	NA	NA	NA	NA	NA	NA	NA
comp233848_c0_seq1	len=307	-1.55203	0.553141	0.0118513	0.77214	NA	NA	NA	NA	NA	NA	NA
comp257235_c4_seq1	len=271	-1.70971	0.51526	0.0232957	1	NA	NA	NA	NA	NA	NA	NA
comp180483_c0_seq1	len=298	1.93667	1.31667	0.011866	0.77214	NA	NA	NA	NA	NA	NA	NA
comp218028_c0_seq1	len=431	1.40212	0.582504	0.0119239	0.774995	NA	NA	NA	NA	NA	NA	NA
comp255677_c1_seq1	len=840	-1.81723	0.866403	0.0119455	0.775023	NA	NA	NA	NA	NA	NA	NA
comp143092_c0_seq1	len=343	1.06496	0.4823	0.0153991	0.874301	NA	NA	NA	NA	NA	NA	NA
comp259828_c5_seq1	len=323	-1.08368	1.33882	0.034709	1	NA	NA	NA	NA	NA	NA	NA
comp242423_c0_seq3	len=765	-1.31492	1.9136	0.0120614	0.780199	NA	NA	NA	NA	NA	NA	NA
comp217749_c0_seq1	len=1021	-1.5839	2.74409	0.0120753	0.780199	NA	NA	NA	NA	NA	NA	NA
comp168184_c0_seq1	len=692	-1.61076	3.23555	0.0236757	1	NA	NA	NA	NA	NA	NA	NA
comp261100_c4_seq14	len=279	-1.59069	3.84211	0.0236887	1	NA	NA	NA	NA	NA	NA	NA
comp215551_c0_seq1	len=373	-1.78727	1.02822	0.027519	1	NA	NA	NA	NA	NA	NA	NA
comp252364_c0_seq2	len=203	1.07317	0.630547	0.0275244	1	NA	NA	NA	NA	NA	NA	NA
comp258425_c2_seq1	len=1224	1.43539	2.20499	0.012158	0.780505	NA	NA	NA	NA	NA	NA	NA
comp260711_c2_seq1	len=534	-1.49032	0.922641	0.0121639	0.780505	NA	NA	NA	NA	NA	NA	NA
comp217467_c0_seq1	len=258	1.17585	1.62905	0.0238175	1	NA	NA	NA	NA	NA	NA	NA
comp258130_c2_seq4	len=607	-1.55617	2.42685	0.0122234	0.782508	NA	NA	NA	NA	NA	NA	NA
comp227964_c0_seq1	len=296	1.17264	1.00836	0.0158281	0.887171	NA	NA	NA	NA	NA	NA	NA
comp242552_c0_seq1	len=349	1.57293	0.843826	0.0239096	1	NA	NA	NA	NA	NA	NA	NA
comp255406_c0_seq1	len=596	-2.17166	1.90136	0.0239341	1	NA	NA	NA	NA	NA	NA	NA
comp260832_c1_seq1	len=305	2.31176	1.87676	0.0123692	0.787402	NA	NA	NA	NA	NA	NA	NA
comp260527_c1_seq4	len=1487	1.22956	0.644121	0.0351588	1	NA	NA	NA	NA	NA	NA	NA
comp252470_c0_seq4	len=703	1.08645	1.6995	0.0239886	1	NA	NA	NA	NA	NA	NA	NA
comp255236_c1_seq9	len=1165	-1.60409	4.00546	0.0352005	1	NA	NA	NA	NA	NA	NA	NA
comp246479_c1_seq1	len=415	-1.09954	1.6316	0.0475524	1	NA	NA	NA	NA	NA	NA	NA
comp215504_c0_seq1	len=224	-1.25512	0.287407	0.0124614	0.78952	NA	NA	NA	NA	NA	NA	NA
comp247372_c1_seq8	len=400	2.02036	0.274749	0.0124807	0.78952	NA	NA	NA	NA	NA	NA	NA
comp243941_c0_seq2	len=287	-1.57572	3.35406	0.0124899	0.78952	NA	NA	NA	NA	NA	NA	NA
comp281206_c0_seq1	len=212	2.15302	1.37536	0.0126248	0.797066	NA	NA	NA	NA	NA	NA	NA
comp234729_c0_seq1	len=769	-1.68746	1.93648	0.0280805	1	NA	NA	NA	NA	NA	NA	NA
comp205623_c0_seq1	len=346	1.34464	0.94027	0.012665	0.797066	NA	NA	NA	NA	NA	NA	NA
comp257284_c0_seq1	len=714	1.61342	0.515411	0.0355437	1	NA	NA	NA	NA	NA	NA	NA
comp252805_c0_seq3	len=541	1.44869	2.43409	0.012683	0.797172	NA	NA	NA	NA	NA	NA	NA
comp310864_c0_seq1	len=214	1.75357	1.3673	0.0126983	0.797225	NA	NA	NA	NA	NA	NA	NA
comp254565_c0_seq2	len=458	1.47908	1.65683	0.0242107	1	NA	NA	NA	NA	NA	NA	NA
comp242387_c0_seq1	len=529	1.10755	0.485367	0.0127557	0.798813	NA	NA	NA	NA	NA	NA	NA
comp240247_c0_seq1	len=234	-1.11102	0.573773	0.0244052	1	NA	NA	NA	NA	NA	NA	NA
comp218088_c0_seq1	len=531	-1.39477	1.20765	0.0128128	0.800781	NA	NA	NA	NA	NA	NA	NA
comp179425_c0_seq1	len=288	1.58477	1.16815	0.0244375	1	NA	NA	NA	NA	NA	NA	NA
comp232935_c0_seq2	len=330	1.31409	0.716687	0.0244569	1	NA	NA	NA	NA	NA	NA	NA
comp260025_c0_seq1	len=361	-1.25727	1.15618	0.0128796	0.801374	NA	NA	NA	NA	NA	NA	NA
comp235327_c0_seq1	len=303	-1.2842	1.26872	0.0244852	1	NA	NA	NA	NA	NA	NA	NA
comp217410_c1_seq1	len=1479	2.51382	4.3011	0.0245234	1	NA	NA	NA	NA	NA	NA	NA
comp249072_c1_seq1	len=803	-1.02265	1.93818	0.0358879	1	NA	NA	NA	NA	NA	NA	NA
comp236330_c1_seq1	len=311	1.13107	0.817192	0.0130287	0.806445	NA	NA	NA	NA	NA	NA	NA
comp259818_c2_seq3	len=413	1.22637	0.476116	0.013042	0.806445	NA	NA	NA	NA	NA	NA	NA
comp180294_c0_seq1	len=261	-1.15631	0.918053	0.0359221	1	NA	NA	NA	NA	NA	NA	NA
comp219293_c0_seq1	len=430	-1.44465	1.11138	0.0247328	1	NA	NA	NA	NA	NA	NA	NA
comp439277_c0_seq1	len=203	1.18476	0.186325	0.0130912	0.806445	NA	NA	NA	NA	NA	NA	NA
comp261802_c0_seq1	len=2136	1.1991	1.14272	0.0131165	0.806445	NA	NA	NA	NA	NA	NA	NA
comp252285_c3_seq1	len=601	1.02987	1.83968	0.0249675	1	NA	NA	NA	NA	NA	NA	NA
comp178725_c0_seq1	len=270	-1.22576	0.989851	0.0131448	0.806445	NA	NA	NA	NA	NA	NA	NA
comp193554_c0_seq1	len=531	1.42067	0.664828	0.0131724	0.806445	NA	NA	NA	NA	NA	NA	NA
comp252168_c1_seq2	len=1456	-2.25257	-0.127266	0.0250292	1	NA	NA	NA	NA	NA	NA	NA
comp245164_c0_seq2	len=467	1.31618	0.841086	0.0131845	0.806445	NA	NA	NA	NA	NA	NA	NA
comp262237_c3_seq4	len=1235	-2.0627	2.63367	0.0131848	0.806445	NA	NA	NA	NA	NA	NA	NA
comp203445_c0_seq1	len=279	1.28152	0.972487	0.0132067	0.806445	NA	NA	NA	NA	NA	NA	NA
comp223003_c0_seq1	len=241	0.965019	-0.0666418	0.0443226	1	NA	NA	NA	NA	NA	NA	NA
comp261460_c0_seq11	len=587	1.18217	1.25046	0.013227	0.806445	NA	NA	NA	NA	NA	NA	NA
comp197127_c0_seq1	len=465	-1.1954	0.317883	0.0132352	0.806445	NA	NA	NA	NA	NA	NA	NA
comp258528_c7_seq3	len=1222	-1.4977	6.17518	0.0132611	0.806445	NA	NA	NA	NA	NA	NA	NA
comp234425_c0_seq1	len=336	1.07422	0.880323	0.0252748	1	NA	NA	NA	NA	NA	NA	NA
comp255796_c0_seq2	len=1622	-1.37223	2.24522	0.013268	0.806445	NA	NA	NA	NA	NA	NA	NA
comp255074_c3_seq1	len=978	1.21932	2.90202	0.0254259	1	NA	NA	NA	NA	NA	NA	NA
comp249109_c0_seq2	len=891	1.5379	1.64434	0.0133058	0.80697	NA	NA	NA	NA	NA	NA	NA
comp260437_c0_seq2	len=1110	1.57358	0.834139	0.0255363	1	NA	NA	NA	NA	NA	NA	NA
comp231789_c1_seq1	len=457	-1.2662	0.37638	0.0133554	0.807899	NA	NA	NA	NA	NA	NA	NA
comp234131_c0_seq1	len=316	1.05258	0.430779	0.0255615	1	NA	NA	NA	NA	NA	NA	NA
comp192362_c0_seq1	len=708	-1.131	0.51927	0.0489835	1	NA	NA	NA	NA	NA	NA	NA
comp259585_c3_seq3	len=528	-1.2039	0.877149	0.0256113	1	NA	NA	NA	NA	NA	NA	NA
comp252670_c1_seq2	len=330	-1.23833	0.999379	0.0134843	0.812454	NA	NA	NA	NA	NA	NA	NA
comp256871_c1_seq1	len=315	-1.17914	0.278162	0.0135596	0.814437	NA	NA	NA	NA	NA	NA	NA
comp259002_c1_seq1	len=375	-1.22544	0.800721	0.0135856	0.814437	NA	NA	NA	NA	NA	NA	NA
comp255621_c1_seq7	len=2443	1.36868	5.61257	0.0256586	1	NA	NA	NA	NA	NA	NA	NA
comp230855_c0_seq1	len=360	1.28483	0.554884	0.0135937	0.814437	NA	NA	NA	NA	NA	NA	NA
comp256457_c1_seq1	len=427	2.1323	1.3111	0.0136038	0.814437	NA	NA	NA	NA	NA	NA	NA
comp231714_c1_seq1	len=665	-3.94857	6.33866	0.0136056	0.814437	NA	NA	NA	NA	NA	NA	NA
comp139195_c0_seq1	len=523	1.08148	1.55631	0.0257594	1	NA	NA	NA	NA	NA	NA	NA
comp240458_c1_seq1	len=308	1.25187	1.07886	0.0257847	1	NA	NA	NA	NA	NA	NA	NA
comp250750_c0_seq5	len=934	-1.12664	2.9272	0.0137248	0.81848	NA	NA	NA	NA	NA	NA	NA
comp257291_c3_seq6	len=1216	-1.37225	0.836777	0.0369133	1	NA	NA	NA	NA	NA	NA	NA
comp227231_c0_seq1	len=708	1.06513	2.4107	0.0369268	1	NA	NA	NA	NA	NA	NA	NA
comp224496_c0_seq1	len=494	-1.32261	0.749323	0.0137895	0.820118	NA	NA	NA	NA	NA	NA	NA
comp255236_c1_seq3	len=331	-1.76436	2.26623	0.0138328	0.82181	NA	NA	NA	NA	NA	NA	NA
comp179518_c0_seq1	len=369	1.43457	0.891261	0.0139053	0.825229	NA	NA	NA	NA	NA	NA	NA
comp261164_c2_seq1	len=247	-1.53185	0.939934	0.0300507	1	NA	NA	NA	NA	NA	NA	NA
comp256336_c1_seq1	len=356	-1.14755	2.13168	0.0372321	1	NA	NA	NA	NA	NA	NA	NA
comp261173_c1_seq3	len=830	1.47667	2.82332	0.0175901	0.92133	NA	NA	NA	NA	NA	NA	NA
comp244778_c3_seq1	len=607	-0.986694	1.24617	0.0497067	1	NA	NA	NA	NA	NA	NA	NA
comp234590_c0_seq1	len=247	-2.12931	1.88027	0.0140695	0.830518	NA	NA	NA	NA	NA	NA	NA
comp254842_c1_seq3	len=497	1.11348	0.624849	0.0140921	0.8306	NA	NA	NA	NA	NA	NA	NA
comp256951_c0_seq1	len=1469	1.3125	2.22478	0.0141009	0.8306	NA	NA	NA	NA	NA	NA	NA
comp261777_c4_seq2	len=1257	1.50295	2.55595	0.0141632	0.833384	NA	NA	NA	NA	NA	NA	NA
comp241032_c0_seq2	len=1354	-1.49678	1.76492	0.0142156	0.835547	NA	NA	NA	NA	NA	NA	NA
comp253659_c0_seq1	len=459	-1.45999	1.77984	0.0142302	0.835547	NA	NA	NA	NA	NA	NA	NA
comp236924_c0_seq1	len=481	-1.98685	1.88697	0.0265199	1	NA	NA	NA	NA	NA	NA	NA
comp202345_c0_seq1	len=202	1.09685	0.0539084	0.0265473	1	NA	NA	NA	NA	NA	NA	NA
comp261180_c0_seq2	len=603	-1.15239	0.786719	0.0143764	0.840854	NA	NA	NA	NA	NA	NA	NA
comp249675_c0_seq1	len=1074	-1.24957	4.1567	0.0375805	1	NA	NA	NA	NA	NA	NA	NA
comp214840_c0_seq1	len=720	1.63209	3.27998	0.0145364	0.849018	NA	NA	NA	NA	NA	NA	NA
comp251323_c0_seq2	len=540	1.60133	2.04629	0.0307166	1	NA	NA	NA	NA	NA	NA	NA
comp245362_c0_seq1	len=219	1.98371	-0.265545	0.0146004	0.850896	NA	NA	NA	NA	NA	NA	NA
comp216635_c0_seq1	len=335	1.67959	4.66668	0.0146147	0.850896	NA	NA	NA	NA	NA	NA	NA
comp253629_c0_seq1	len=1198	-1.4424	2.42405	0.0268353	1	NA	NA	NA	NA	NA	NA	NA
comp241625_c0_seq1	len=404	0.988443	1.50525	0.0268474	1	NA	NA	NA	NA	NA	NA	NA
comp258988_c4_seq1	len=813	-1.28942	2.42476	0.01467	0.851355	NA	NA	NA	NA	NA	NA	NA
comp228550_c0_seq1	len=495	-1.75515	-0.0290525	0.0146888	0.851355	NA	NA	NA	NA	NA	NA	NA
comp238941_c0_seq1	len=250	-1.3521	1.16212	0.0146995	0.851355	NA	NA	NA	NA	NA	NA	NA
comp214135_c0_seq1	len=332	1.1569	0.436587	0.014734	0.852462	NA	NA	NA	NA	NA	NA	NA
comp247960_c1_seq1	len=1287	1.12009	4.01452	0.0270664	1	NA	NA	NA	NA	NA	NA	NA
comp253424_c7_seq2	len=1194	-1.85201	3.937	0.0185722	0.952035	NA	NA	NA	NA	NA	NA	NA
comp233594_c0_seq1	len=212	1.1107	1.61228	0.0147961	0.853375	NA	NA	NA	NA	NA	NA	NA
comp202863_c0_seq1	len=425	1.5874	0.845203	0.0148442	0.855258	NA	NA	NA	NA	NA	NA	NA
comp324720_c0_seq1	len=346	-1.07994	1.38493	0.0272229	1	NA	NA	NA	NA	NA	NA	NA
comp260979_c3_seq10	len=231	1.53377	0.40471	0.0149394	0.858951	NA	NA	NA	NA	NA	NA	NA
comp235477_c1_seq1	len=619	1.87479	1.26087	0.0149638	0.859466	NA	NA	NA	NA	NA	NA	NA
comp262056_c0_seq6	len=446	-1.11819	0.896326	0.0150206	0.861828	NA	NA	NA	NA	NA	NA	NA
comp228947_c0_seq1	len=267	2.01455	0.553733	0.0151188	0.866564	NA	NA	NA	NA	NA	NA	NA
comp256802_c0_seq1	len=718	2.79526	2.52731	0.0151706	0.867794	NA	NA	NA	NA	NA	NA	NA
comp246543_c1_seq1	len=237	0.98282	0.715171	0.0385178	1	NA	NA	NA	NA	NA	NA	NA
comp180007_c0_seq1	len=437	1.35296	1.73978	0.0152328	0.870205	NA	NA	NA	NA	NA	NA	NA
comp247833_c1_seq1	len=203	-1.26286	0.771176	0.0152452	0.870205	NA	NA	NA	NA	NA	NA	NA
comp175056_c0_seq1	len=533	-1.52157	0.735971	0.0273761	1	NA	NA	NA	NA	NA	NA	NA
comp250794_c0_seq1	len=379	-1.14089	1.2798	0.0273811	1	NA	NA	NA	NA	NA	NA	NA
comp251041_c0_seq2	len=374	1.35648	0.534763	0.0153588	0.873503	NA	NA	NA	NA	NA	NA	NA
comp245971_c1_seq1	len=279	-1.26843	0.446174	0.0153662	0.873503	NA	NA	NA	NA	NA	NA	NA
comp254005_c1_seq1	len=449	-1.15367	1.34932	0.0315385	1	NA	NA	NA	NA	NA	NA	NA
comp252909_c3_seq1	len=1134	-1.14671	1.86114	0.0192718	0.971971	NA	NA	NA	NA	NA	NA	NA
comp332523_c0_seq1	len=207	1.10018	0.886554	0.0274758	1	NA	NA	NA	NA	NA	NA	NA
comp243262_c0_seq1	len=283	1.26554	0.322113	0.0155367	0.87949	NA	NA	NA	NA	NA	NA	NA
comp236102_c0_seq1	len=289	0.989449	1.11876	0.0275083	1	NA	NA	NA	NA	NA	NA	NA
comp247473_c0_seq1	len=507	-1.82645	1.38527	0.0156093	0.881888	NA	NA	NA	NA	NA	NA	NA
comp251653_c0_seq1	len=794	-1.03602	1.68299	0.0316865	1	NA	NA	NA	NA	NA	NA	NA
comp166394_c0_seq1	len=558	2.9734	4.90074	0.019443	0.975871	NA	NA	NA	NA	NA	NA	NA
comp255125_c0_seq1	len=342	-1.00648	0.739137	0.0426558	1	NA	NA	NA	NA	NA	NA	NA
comp249430_c0_seq1	len=368	1.22474	1.37466	0.0390909	1	NA	NA	NA	NA	NA	NA	NA
comp244072_c1_seq1	len=519	1.26336	2.02455	0.0157459	0.885082	NA	NA	NA	NA	NA	NA	NA
comp250254_c2_seq1	len=238	1.15662	0.66875	0.0277625	1	NA	NA	NA	NA	NA	NA	NA
comp244261_c0_seq1	len=663	1.03598	2.18869	0.0318567	1	NA	NA	NA	NA	NA	NA	NA
comp260273_c1_seq1	len=346	1.31088	1.35403	0.0392373	1	NA	NA	NA	NA	NA	NA	NA
comp293492_c0_seq1	len=269	1.34516	1.35993	0.0278087	1	NA	NA	NA	NA	NA	NA	NA
comp221929_c0_seq1	len=725	-2.11555	1.67435	0.0392936	1	NA	NA	NA	NA	NA	NA	NA
comp226628_c0_seq1	len=988	-1.93138	3.4678	0.0278316	1	NA	NA	NA	NA	NA	NA	NA
comp251022_c0_seq1	len=1487	1.24293	1.7233	0.0159403	0.889324	NA	NA	NA	NA	NA	NA	NA
comp210367_c0_seq1	len=326	1.6797	0.964196	0.027893	1	NA	NA	NA	NA	NA	NA	NA
comp258084_c0_seq1	len=1498	2.11926	0.176731	0.0159661	0.889324	NA	NA	NA	NA	NA	NA	NA
comp247463_c0_seq2	len=901	-1.29647	2.83383	0.0394334	1	NA	NA	NA	NA	NA	NA	NA
comp246838_c0_seq1	len=640	0.92374	1.75491	0.039437	1	NA	NA	NA	NA	NA	NA	NA
comp217086_c0_seq1	len=412	-1.1017	1.8384	0.0280168	1	NA	NA	NA	NA	NA	NA	NA
comp221558_c0_seq1	len=648	-1.06154	1.56844	0.0395207	1	NA	NA	NA	NA	NA	NA	NA
comp181440_c0_seq1	len=263	1.33013	-0.200199	0.0200323	0.988771	NA	NA	NA	NA	NA	NA	NA
comp130750_c0_seq1	len=451	1.27465	1.71972	0.0281038	1	NA	NA	NA	NA	NA	NA	NA
comp234584_c0_seq1	len=449	-1.12065	1.22094	0.0281328	1	NA	NA	NA	NA	NA	NA	NA
comp260154_c0_seq16	len=232	1.57211	0.387271	0.0161623	0.892684	NA	NA	NA	NA	NA	NA	NA
comp217533_c0_seq1	len=715	-1.21269	2.046	0.0161716	0.892684	NA	NA	NA	NA	NA	NA	NA
comp197644_c0_seq1	len=519	1.12441	3.07754	0.0161999	0.89323	NA	NA	NA	NA	NA	NA	NA
comp257972_c0_seq1	len=676	-0.972723	2.14948	0.0396317	1	NA	NA	NA	NA	NA	NA	NA
comp264039_c0_seq1	len=363	1.47119	3.4294	0.0162457	0.893605	NA	NA	NA	NA	NA	NA	NA
comp254486_c0_seq4	len=649	-1.47276	4.00887	0.0162535	0.893605	NA	NA	NA	NA	NA	NA	NA
comp260163_c1_seq4	len=538	-1.67973	0.633641	0.0399674	1	NA	NA	NA	NA	NA	NA	NA
comp256970_c1_seq12	len=469	-1.25573	1.03591	0.0284965	1	NA	NA	NA	NA	NA	NA	NA
comp234839_c1_seq1	len=293	-1.98024	1.17023	0.0163099	0.894072	NA	NA	NA	NA	NA	NA	NA
comp259274_c1_seq1	len=329	-1.35433	1.01253	0.0163488	0.89473	NA	NA	NA	NA	NA	NA	NA
comp289361_c0_seq1	len=368	1.48554	2.51084	0.0163749	0.89473	NA	NA	NA	NA	NA	NA	NA
comp257347_c1_seq2	len=210	1.22384	-0.00961893	0.0163848	0.89473	NA	NA	NA	NA	NA	NA	NA
comp252358_c0_seq1	len=681	-1.63787	1.61905	0.0163866	0.89473	NA	NA	NA	NA	NA	NA	NA
comp257501_c0_seq4	len=371	-1.17048	1.19179	0.0286841	1	NA	NA	NA	NA	NA	NA	NA
comp248758_c0_seq2	len=804	1.24734	1.42523	0.0287012	1	NA	NA	NA	NA	NA	NA	NA
comp239323_c0_seq1	len=1430	1.46925	7.72	0.0287516	1	NA	NA	NA	NA	NA	NA	NA
comp149622_c0_seq1	len=316	2.40455	1.55097	0.0165506	0.898774	NA	NA	NA	NA	NA	NA	NA
comp254338_c0_seq1	len=2002	-1.13932	1.71767	0.0287721	1	NA	NA	NA	NA	NA	NA	NA
comp230079_c1_seq1	len=211	-1.08644	0.282888	0.028788	1	NA	NA	NA	NA	NA	NA	NA
comp258640_c0_seq5	len=850	1.17548	1.76531	0.0165773	0.898774	NA	NA	NA	NA	NA	NA	NA
comp217260_c1_seq1	len=349	1.915	1.56379	0.0166247	0.898774	NA	NA	NA	NA	NA	NA	NA
comp141041_c0_seq1	len=326	-1.06512	1.67803	0.0441299	1	NA	NA	NA	NA	NA	NA	NA
comp243521_c0_seq1	len=557	1.20082	0.543675	0.0166307	0.898774	NA	NA	NA	NA	NA	NA	NA
comp354863_c0_seq1	len=438	1.52999	1.47641	0.0208812	1	NA	NA	NA	NA	NA	NA	NA
comp232935_c0_seq1	len=330	1.37867	0.730868	0.0291427	1	NA	NA	NA	NA	NA	NA	NA
comp255621_c1_seq3	len=372	-1.8512	3.63792	0.0486216	1	NA	NA	NA	NA	NA	NA	NA
comp254967_c0_seq1	len=713	-2.39282	3.26106	0.0167249	0.900751	NA	NA	NA	NA	NA	NA	NA
comp254982_c1_seq1	len=239	1.28523	0.150162	0.0167604	0.901782	NA	NA	NA	NA	NA	NA	NA
comp254446_c2_seq1	len=333	1.1132	1.42871	0.0167938	0.902705	NA	NA	NA	NA	NA	NA	NA
comp258032_c4_seq3	len=290	-2.11296	1.41613	0.0168115	0.902776	NA	NA	NA	NA	NA	NA	NA
comp202277_c0_seq1	len=311	1.18254	0.385009	0.0168335	0.903051	NA	NA	NA	NA	NA	NA	NA
comp243677_c0_seq1	len=309	1.18966	1.72966	0.0293501	1	NA	NA	NA	NA	NA	NA	NA
comp261659_c0_seq3	len=1467	1.23918	1.23989	0.0169186	0.905893	NA	NA	NA	NA	NA	NA	NA
comp247003_c0_seq3	len=357	1.19077	1.64262	0.0407671	1	NA	NA	NA	NA	NA	NA	NA
comp218793_c0_seq1	len=367	1.05329	0.582973	0.0213784	1	NA	NA	NA	NA	NA	NA	NA
comp240243_c1_seq1	len=304	-1.01444	0.82948	0.0408008	1	NA	NA	NA	NA	NA	NA	NA
comp244726_c3_seq1	len=336	-1.25761	0.540017	0.0170981	0.911512	NA	NA	NA	NA	NA	NA	NA
comp228646_c0_seq1	len=358	-1.51349	1.60109	0.0295885	1	NA	NA	NA	NA	NA	NA	NA
comp226816_c2_seq1	len=378	-1.1152	0.567233	0.0171336	0.911512	NA	NA	NA	NA	NA	NA	NA
comp251741_c0_seq1	len=316	-2.31281	0.753137	0.0296802	1	NA	NA	NA	NA	NA	NA	NA
comp239424_c1_seq1	len=305	1.26198	1.78399	0.0296898	1	NA	NA	NA	NA	NA	NA	NA
comp218568_c0_seq1	len=228	1.43787	1.01273	0.0171842	0.912164	NA	NA	NA	NA	NA	NA	NA
comp249405_c0_seq2	len=353	-1.1709	1.09744	0.0297145	1	NA	NA	NA	NA	NA	NA	NA
comp257875_c1_seq6	len=708	1.66785	2.39162	0.017234	0.912907	NA	NA	NA	NA	NA	NA	NA
comp203365_c0_seq1	len=237	-1.73018	1.45536	0.0172578	0.912907	NA	NA	NA	NA	NA	NA	NA
comp165899_c0_seq1	len=439	-1.0266	0.627986	0.0409644	1	NA	NA	NA	NA	NA	NA	NA
comp223008_c0_seq1	len=257	1.04463	0.325319	0.029808	1	NA	NA	NA	NA	NA	NA	NA
comp230632_c0_seq1	len=469	1.05513	3.04303	0.0334067	1	NA	NA	NA	NA	NA	NA	NA
comp262304_c1_seq1	len=378	-1.10282	0.61616	0.041083	1	NA	NA	NA	NA	NA	NA	NA
comp262106_c0_seq14	len=342	1.19371	0.699788	0.0174288	0.91684	NA	NA	NA	NA	NA	NA	NA
comp239186_c0_seq1	len=646	1.39735	1.49411	0.0299598	1	NA	NA	NA	NA	NA	NA	NA
comp252540_c0_seq1	len=1353	1.23619	3.89765	0.01746	0.91684	NA	NA	NA	NA	NA	NA	NA
comp253967_c0_seq1	len=796	1.16642	3.88366	0.0300329	1	NA	NA	NA	NA	NA	NA	NA
comp246975_c1_seq2	len=568	-0.946269	1.61502	0.0450864	1	NA	NA	NA	NA	NA	NA	NA
comp260184_c0_seq8	len=1034	-1.5615	0.850836	0.0413005	1	NA	NA	NA	NA	NA	NA	NA
comp233223_c0_seq1	len=327	0.899755	0.453455	0.0452998	1	NA	NA	NA	NA	NA	NA	NA
comp261670_c0_seq4	len=506	2.3646	4.71492	0.0176385	0.922995	NA	NA	NA	NA	NA	NA	NA
comp244540_c0_seq1	len=226	-1.34571	1.19967	0.0302035	1	NA	NA	NA	NA	NA	NA	NA
comp145369_c0_seq1	len=406	-1.2861	0.813364	0.0177334	0.925625	NA	NA	NA	NA	NA	NA	NA
comp303334_c0_seq1	len=332	1.64663	1.52363	0.017739	0.925625	NA	NA	NA	NA	NA	NA	NA
comp216800_c0_seq1	len=281	1.36887	2.78005	0.0303629	1	NA	NA	NA	NA	NA	NA	NA
comp261381_c0_seq2	len=2935	1.20071	4.23151	0.030376	1	NA	NA	NA	NA	NA	NA	NA
comp222532_c1_seq1	len=255	-1.34548	0.264551	0.0178698	0.929535	NA	NA	NA	NA	NA	NA	NA
comp236013_c0_seq1	len=285	-1.12861	0.370482	0.0304868	1	NA	NA	NA	NA	NA	NA	NA
comp219227_c0_seq1	len=288	1.0556	0.672875	0.0415216	1	NA	NA	NA	NA	NA	NA	NA
comp278461_c0_seq1	len=253	-1.50371	2.10822	0.0180458	0.936334	NA	NA	NA	NA	NA	NA	NA
comp234853_c1_seq1	len=591	1.23263	1.62905	0.0181038	0.938464	NA	NA	NA	NA	NA	NA	NA
comp237685_c0_seq1	len=672	-1.6249	2.02025	0.0181676	0.940888	NA	NA	NA	NA	NA	NA	NA
comp248845_c0_seq1	len=512	-1.03713	2.57537	0.0456028	1	NA	NA	NA	NA	NA	NA	NA
comp259779_c0_seq1	len=603	-1.50572	0.504484	0.0182914	0.94553	NA	NA	NA	NA	NA	NA	NA
comp238064_c0_seq1	len=441	1.12788	1.28674	0.0307715	1	NA	NA	NA	NA	NA	NA	NA
comp246583_c0_seq1	len=396	1.39098	0.901325	0.0183609	0.946237	NA	NA	NA	NA	NA	NA	NA
comp253606_c0_seq2	len=1815	1.48347	1.36135	0.0183642	0.946237	NA	NA	NA	NA	NA	NA	NA
comp241747_c0_seq1	len=827	-1.59316	2.24267	0.0308415	1	NA	NA	NA	NA	NA	NA	NA
comp244519_c0_seq2	len=309	-1.93771	0.111115	0.0308465	1	NA	NA	NA	NA	NA	NA	NA
comp235724_c0_seq1	len=779	1.21374	2.92016	0.0184905	0.950461	NA	NA	NA	NA	NA	NA	NA
comp244144_c4_seq1	len=405	1.10877	1.1628	0.0417062	1	NA	NA	NA	NA	NA	NA	NA
comp232202_c0_seq1	len=399	1.14436	0.41536	0.0309954	1	NA	NA	NA	NA	NA	NA	NA
comp363682_c0_seq1	len=210	-1.19141	0.693085	0.0342559	1	NA	NA	NA	NA	NA	NA	NA
comp235790_c0_seq1	len=203	1.10358	0.607214	0.0310131	1	NA	NA	NA	NA	NA	NA	NA
comp166673_c0_seq1	len=379	1.30456	1.72786	0.0310972	1	NA	NA	NA	NA	NA	NA	NA
comp261712_c4_seq6	len=706	2.38323	0.648938	0.0187784	0.957458	NA	NA	NA	NA	NA	NA	NA
comp266102_c0_seq1	len=206	1.38557	3.04663	0.0187813	0.957458	NA	NA	NA	NA	NA	NA	NA
comp228782_c0_seq1	len=376	1.10008	0.611512	0.0187865	0.957458	NA	NA	NA	NA	NA	NA	NA
comp257980_c1_seq1	len=1373	1.11327	1.31197	0.03118	1	NA	NA	NA	NA	NA	NA	NA
comp248034_c1_seq1	len=402	-1.1757	0.891239	0.0418944	1	NA	NA	NA	NA	NA	NA	NA
comp217269_c0_seq1	len=502	0.944183	2.61754	0.0419018	1	NA	NA	NA	NA	NA	NA	NA
comp198603_c0_seq1	len=226	1.03234	2.74471	0.0188768	0.95959	NA	NA	NA	NA	NA	NA	NA
comp262516_c0_seq11	len=501	1.31108	1.86568	0.0189138	0.95959	NA	NA	NA	NA	NA	NA	NA
comp485202_c0_seq1	len=336	1.52044	0.687441	0.0313012	1	NA	NA	NA	NA	NA	NA	NA
comp240447_c1_seq1	len=365	1.57934	1.74939	0.0189277	0.95959	NA	NA	NA	NA	NA	NA	NA
comp245569_c1_seq1	len=416	1.10139	3.20743	0.031409	1	NA	NA	NA	NA	NA	NA	NA
comp260909_c1_seq3	len=306	-2.76426	4.39139	0.0422197	1	NA	NA	NA	NA	NA	NA	NA
comp223039_c1_seq1	len=252	1.12158	1.20215	0.0315196	1	NA	NA	NA	NA	NA	NA	NA
comp223714_c0_seq1	len=231	-1.14144	0.64052	0.02348	1	NA	NA	NA	NA	NA	NA	NA
comp247524_c0_seq1	len=416	-1.08393	0.237784	0.0347015	1	NA	NA	NA	NA	NA	NA	NA
comp234362_c1_seq2	len=455	1.11633	1.46749	0.042425	1	NA	NA	NA	NA	NA	NA	NA
comp199796_c0_seq1	len=664	-1.63864	2.27067	0.0193504	0.973908	NA	NA	NA	NA	NA	NA	NA
comp188264_c0_seq1	len=255	1.22923	1.24156	0.019351	0.973908	NA	NA	NA	NA	NA	NA	NA
comp235155_c0_seq1	len=262	-1.08568	0.244065	0.0316735	1	NA	NA	NA	NA	NA	NA	NA
comp143639_c0_seq1	len=614	2.35424	1.60631	0.0347435	1	NA	NA	NA	NA	NA	NA	NA
comp246327_c1_seq1	len=443	1.07671	1.28461	0.0390057	1	NA	NA	NA	NA	NA	NA	NA
comp254653_c5_seq4	len=532	-1.26707	1.95579	0.0237577	1	NA	NA	NA	NA	NA	NA	NA
comp247957_c0_seq1	len=1117	-1.49815	2.69277	0.0237672	1	NA	NA	NA	NA	NA	NA	NA
comp198312_c0_seq1	len=314	-2.35619	2.32054	0.0318313	1	NA	NA	NA	NA	NA	NA	NA
comp257812_c1_seq2	len=259	-1.21501	1.04568	0.0197282	0.986114	NA	NA	NA	NA	NA	NA	NA
comp234474_c0_seq3	len=284	1.20133	1.95408	0.0350359	1	NA	NA	NA	NA	NA	NA	NA
comp258367_c1_seq1	len=316	-1.45044	0.95216	0.019754	0.986114	NA	NA	NA	NA	NA	NA	NA
comp231729_c0_seq1	len=401	-1.10441	2.74981	0.0318748	1	NA	NA	NA	NA	NA	NA	NA
comp222257_c0_seq1	len=231	1.59011	2.98262	0.0198237	0.98781	NA	NA	NA	NA	NA	NA	NA
comp211210_c0_seq2	len=323	1.36566	1.0597	0.0319125	1	NA	NA	NA	NA	NA	NA	NA
comp252747_c0_seq3	len=623	2.14103	0.103187	0.01991	0.988771	NA	NA	NA	NA	NA	NA	NA
comp237229_c0_seq1	len=561	-1.07102	0.284777	0.0320581	1	NA	NA	NA	NA	NA	NA	NA
comp242964_c0_seq1	len=233	2.15559	0.660957	0.0320893	1	NA	NA	NA	NA	NA	NA	NA
comp256704_c0_seq2	len=213	1.20145	-0.0516534	0.032101	1	NA	NA	NA	NA	NA	NA	NA
comp219035_c0_seq1	len=355	1.47057	0.956443	0.0199828	0.988771	NA	NA	NA	NA	NA	NA	NA
comp250228_c0_seq1	len=665	0.969147	1.68425	0.0321144	1	NA	NA	NA	NA	NA	NA	NA
comp238752_c0_seq3	len=766	1.85	1.56608	0.0429265	1	NA	NA	NA	NA	NA	NA	NA
comp216170_c0_seq1	len=908	-1.26542	4.03687	0.0354845	1	NA	NA	NA	NA	NA	NA	NA
comp244673_c0_seq1	len=655	-1.77808	0.42513	0.0200377	0.988771	NA	NA	NA	NA	NA	NA	NA
comp261440_c0_seq2	len=381	0.993195	1.01233	0.032289	1	NA	NA	NA	NA	NA	NA	NA
comp262301_c0_seq3	len=897	1.58145	0.191511	0.0200843	0.988771	NA	NA	NA	NA	NA	NA	NA
comp202608_c0_seq1	len=335	1.03298	0.897543	0.0323506	1	NA	NA	NA	NA	NA	NA	NA
comp241081_c0_seq2	len=344	-1.19378	1.23424	0.0431616	1	NA	NA	NA	NA	NA	NA	NA
comp230571_c1_seq1	len=1142	1.82458	2.62875	0.0201111	0.988771	NA	NA	NA	NA	NA	NA	NA
comp248455_c0_seq1	len=303	-1.07843	0.877833	0.0201443	0.989523	NA	NA	NA	NA	NA	NA	NA
comp222080_c0_seq1	len=272	-1.0321	0.443565	0.0433976	1	NA	NA	NA	NA	NA	NA	NA
comp258968_c1_seq11	len=321	-1.14596	2.81608	0.0325399	1	NA	NA	NA	NA	NA	NA	NA
comp229175_c0_seq1	len=502	-1.39595	0.0959337	0.0325972	1	NA	NA	NA	NA	NA	NA	NA
comp217436_c0_seq1	len=372	1.41853	2.99078	0.0203505	0.994842	NA	NA	NA	NA	NA	NA	NA
comp241452_c1_seq1	len=278	1.01822	2.16959	0.0326262	1	NA	NA	NA	NA	NA	NA	NA
comp255217_c0_seq1	len=297	1.04645	0.957651	0.0326577	1	NA	NA	NA	NA	NA	NA	NA
comp234276_c1_seq1	len=320	-1.29381	0.276628	0.0204125	0.994842	NA	NA	NA	NA	NA	NA	NA
comp244367_c1_seq1	len=1314	1.44905	2.55026	0.0204235	0.994842	NA	NA	NA	NA	NA	NA	NA
comp249945_c3_seq2	len=1734	-1.21369	5.64098	0.0204383	0.994842	NA	NA	NA	NA	NA	NA	NA
comp253609_c0_seq3	len=665	-1.13191	2.07092	0.0327269	1	NA	NA	NA	NA	NA	NA	NA
comp249793_c1_seq1	len=681	2.10377	1.18589	0.0327613	1	NA	NA	NA	NA	NA	NA	NA
comp250750_c1_seq1	len=340	1.37274	0.292778	0.0439284	1	NA	NA	NA	NA	NA	NA	NA
comp257605_c0_seq9	len=804	1.88973	0.206939	0.0204864	0.994842	NA	NA	NA	NA	NA	NA	NA
comp217430_c0_seq1	len=212	1.13417	1.41677	0.0440979	1	NA	NA	NA	NA	NA	NA	NA
comp237231_c0_seq1	len=212	-1.74089	2.32468	0.0206321	1	NA	NA	NA	NA	NA	NA	NA
comp319626_c0_seq1	len=468	2.05068	1.32651	0.0206685	1	NA	NA	NA	NA	NA	NA	NA
comp221990_c1_seq1	len=315	-1.20606	0.358758	0.0249796	1	NA	NA	NA	NA	NA	NA	NA
comp232022_c0_seq1	len=664	-1.10471	3.53645	0.0360413	1	NA	NA	NA	NA	NA	NA	NA
comp262171_c1_seq2	len=1020	1.1883	1.06484	0.0250446	1	NA	NA	NA	NA	NA	NA	NA
comp249038_c0_seq1	len=845	1.36069	5.93749	0.0330177	1	NA	NA	NA	NA	NA	NA	NA
comp246263_c0_seq1	len=863	-1.19496	1.63017	0.0405297	1	NA	NA	NA	NA	NA	NA	NA
comp255800_c1_seq3	len=2164	-1.41718	0.48212	0.0485679	1	NA	NA	NA	NA	NA	NA	NA
comp216354_c0_seq1	len=311	1.05797	2.25886	0.0444107	1	NA	NA	NA	NA	NA	NA	NA
comp201400_c1_seq1	len=241	-0.994889	0.563866	0.0330444	1	NA	NA	NA	NA	NA	NA	NA
comp260742_c2_seq8	len=214	1.14294	0.481013	0.0330702	1	NA	NA	NA	NA	NA	NA	NA
comp228174_c0_seq2	len=321	-1.6421	1.04823	0.0445033	1	NA	NA	NA	NA	NA	NA	NA
comp131780_c0_seq1	len=352	1.46963	2.77605	0.0331033	1	NA	NA	NA	NA	NA	NA	NA
comp276992_c0_seq1	len=235	-1.08381	1.8737	0.0445182	1	NA	NA	NA	NA	NA	NA	NA
comp227111_c0_seq1	len=256	1.24058	0.101192	0.02137	1	NA	NA	NA	NA	NA	NA	NA
comp257558_c0_seq1	len=481	2.57953	3.48501	0.0363519	1	NA	NA	NA	NA	NA	NA	NA
comp286297_c0_seq1	len=267	2.22844	1.42228	0.025551	1	NA	NA	NA	NA	NA	NA	NA
comp254446_c3_seq3	len=614	1.01975	2.29183	0.0214442	1	NA	NA	NA	NA	NA	NA	NA
comp213551_c0_seq1	len=539	1.1815	2.39186	0.0214567	1	NA	NA	NA	NA	NA	NA	NA
comp249340_c1_seq2	len=901	-2.06948	2.35879	0.0214602	1	NA	NA	NA	NA	NA	NA	NA
comp180067_c0_seq1	len=296	1.18527	1.26522	0.0214602	1	NA	NA	NA	NA	NA	NA	NA
comp242120_c0_seq1	len=563	-1.10291	2.48249	0.021462	1	NA	NA	NA	NA	NA	NA	NA
comp224805_c0_seq1	len=224	1.28604	1.36205	0.0215608	1	NA	NA	NA	NA	NA	NA	NA
comp258921_c0_seq5	len=376	-1.7508	1.14221	0.0332732	1	NA	NA	NA	NA	NA	NA	NA
comp255381_c0_seq1	len=579	1.22043	2.73391	0.0256612	1	NA	NA	NA	NA	NA	NA	NA
comp254757_c0_seq1	len=657	1.17103	3.10675	0.0333173	1	NA	NA	NA	NA	NA	NA	NA
comp200378_c0_seq1	len=241	-1.37708	-0.0335311	0.0257201	1	NA	NA	NA	NA	NA	NA	NA
comp249266_c0_seq1	len=712	-1.26315	2.34457	0.0449	1	NA	NA	NA	NA	NA	NA	NA
comp239633_c0_seq3	len=797	-1.01481	2.66349	0.0368697	1	NA	NA	NA	NA	NA	NA	NA
comp244512_c0_seq3	len=308	-1.97984	2.31197	0.0334139	1	NA	NA	NA	NA	NA	NA	NA
comp241898_c0_seq1	len=626	1.16628	5.97277	0.033422	1	NA	NA	NA	NA	NA	NA	NA
comp217982_c0_seq1	len=645	0.973222	2.29374	0.0334221	1	NA	NA	NA	NA	NA	NA	NA
comp180882_c0_seq1	len=349	1.35945	1.30053	0.0219421	1	NA	NA	NA	NA	NA	NA	NA
comp244175_c3_seq1	len=579	-1.18286	1.35015	0.0260028	1	NA	NA	NA	NA	NA	NA	NA
comp252350_c0_seq2	len=326	0.983247	0.386372	0.0261032	1	NA	NA	NA	NA	NA	NA	NA
comp251605_c4_seq2	len=836	1.22449	0.188656	0.0372156	1	NA	NA	NA	NA	NA	NA	NA
comp226431_c0_seq1	len=437	-1.21476	1.89704	0.0496887	1	NA	NA	NA	NA	NA	NA	NA
comp262327_c0_seq1	len=202	1.08977	0.20909	0.0453166	1	NA	NA	NA	NA	NA	NA	NA
comp216312_c0_seq2	len=529	-1.62611	2.47806	0.0220836	1	NA	NA	NA	NA	NA	NA	NA
comp260887_c0_seq3	len=3023	1.64046	2.69846	0.0221003	1	NA	NA	NA	NA	NA	NA	NA
comp145481_c0_seq1	len=268	1.32738	0.820095	0.0264216	1	NA	NA	NA	NA	NA	NA	NA
comp169242_c0_seq1	len=256	1.07399	0.0509308	0.0337435	1	NA	NA	NA	NA	NA	NA	NA
comp223198_c0_seq1	len=332	-1.35069	1.21158	0.0337947	1	NA	NA	NA	NA	NA	NA	NA
comp255210_c4_seq3	len=317	1.7486	2.70221	0.0337957	1	NA	NA	NA	NA	NA	NA	NA
comp201101_c1_seq1	len=407	-0.986425	0.706227	0.033821	1	NA	NA	NA	NA	NA	NA	NA
comp256926_c0_seq3	len=243	-2.87945	2.34773	0.022295	1	NA	NA	NA	NA	NA	NA	NA
comp238883_c1_seq1	len=325	1.07112	0.293872	0.045586	1	NA	NA	NA	NA	NA	NA	NA
comp243949_c0_seq1	len=449	-1.43903	1.81066	0.0339491	1	NA	NA	NA	NA	NA	NA	NA
comp228553_c0_seq1	len=501	1.34281	1.70816	0.0224021	1	NA	NA	NA	NA	NA	NA	NA
comp176045_c0_seq2	len=516	1.28866	1.09423	0.0266551	1	NA	NA	NA	NA	NA	NA	NA
comp252904_c1_seq2	len=1169	-1.49947	2.53822	0.0224979	1	NA	NA	NA	NA	NA	NA	NA
comp245147_c0_seq1	len=706	1.25675	2.67161	0.0225242	1	NA	NA	NA	NA	NA	NA	NA
comp254891_c1_seq5	len=924	1.0731	0.607385	0.0267327	1	NA	NA	NA	NA	NA	NA	NA
comp231348_c0_seq1	len=726	-1.68839	3.92337	0.0339842	1	NA	NA	NA	NA	NA	NA	NA
comp248867_c0_seq2	len=1387	-1.10875	1.17814	0.034157	1	NA	NA	NA	NA	NA	NA	NA
comp179964_c0_seq1	len=458	-2.37499	0.865361	0.0341969	1	NA	NA	NA	NA	NA	NA	NA
comp246359_c2_seq1	len=594	1.59229	0.608493	0.0228124	1	NA	NA	NA	NA	NA	NA	NA
comp253032_c3_seq4	len=1172	-1.19069	2.90467	0.0228257	1	NA	NA	NA	NA	NA	NA	NA
comp199038_c0_seq1	len=361	1.20939	0.880426	0.0228276	1	NA	NA	NA	NA	NA	NA	NA
comp163186_c0_seq1	len=419	-1.25942	0.608298	0.0379146	1	NA	NA	NA	NA	NA	NA	NA
comp261089_c0_seq25	len=308	1.27152	1.02239	0.0342635	1	NA	NA	NA	NA	NA	NA	NA
comp253718_c0_seq2	len=389	1.25268	0.712637	0.0229008	1	NA	NA	NA	NA	NA	NA	NA
comp255327_c1_seq1	len=576	1.10068	0.744262	0.0461486	1	NA	NA	NA	NA	NA	NA	NA
comp137800_c0_seq1	len=261	0.994852	0.446814	0.0380349	1	NA	NA	NA	NA	NA	NA	NA
comp245681_c0_seq1	len=481	1.15789	1.73185	0.0230018	1	NA	NA	NA	NA	NA	NA	NA
comp258835_c0_seq9	len=334	1.52377	0.6613	0.0230334	1	NA	NA	NA	NA	NA	NA	NA
comp237544_c0_seq1	len=248	1.01054	1.13656	0.034429	1	NA	NA	NA	NA	NA	NA	NA
comp255276_c1_seq2	len=381	1.05217	0.737679	0.0464391	1	NA	NA	NA	NA	NA	NA	NA
comp239424_c2_seq1	len=480	1.21261	1.77206	0.034465	1	NA	NA	NA	NA	NA	NA	NA
comp245918_c1_seq1	len=413	-1.09499	0.959928	0.0312738	1	NA	NA	NA	NA	NA	NA	NA
comp466373_c0_seq1	len=341	1.20679	0.416139	0.0344765	1	NA	NA	NA	NA	NA	NA	NA
comp251978_c1_seq1	len=264	1.3611	0.985332	0.0232896	1	NA	NA	NA	NA	NA	NA	NA
comp262306_c5_seq2	len=656	-0.998234	1.17389	0.0345263	1	NA	NA	NA	NA	NA	NA	NA
comp246431_c1_seq1	len=437	-1.20961	0.803106	0.0233214	1	NA	NA	NA	NA	NA	NA	NA
comp248082_c2_seq1	len=307	-1.09388	1.48895	0.0234477	1	NA	NA	NA	NA	NA	NA	NA
comp261930_c1_seq1	len=408	1.22677	1.41859	0.0273901	1	NA	NA	NA	NA	NA	NA	NA
comp223117_c0_seq1	len=304	1.11347	0.380641	0.0388439	1	NA	NA	NA	NA	NA	NA	NA
comp251408_c0_seq2	len=1058	1.26192	3.96844	0.0315688	1	NA	NA	NA	NA	NA	NA	NA
comp256411_c0_seq5	len=271	1.98262	0.842633	0.0468377	1	NA	NA	NA	NA	NA	NA	NA
comp250293_c0_seq2	len=1825	1.76004	4.67617	0.0236568	1	NA	NA	NA	NA	NA	NA	NA
comp254173_c1_seq5	len=809	2.04635	0.691642	0.0347291	1	NA	NA	NA	NA	NA	NA	NA
comp254179_c5_seq8	len=718	-1.33313	1.84333	0.0275087	1	NA	NA	NA	NA	NA	NA	NA
comp238267_c0_seq1	len=242	0.973624	0.475766	0.0426382	1	NA	NA	NA	NA	NA	NA	NA
comp178713_c0_seq1	len=225	-1.23249	1.35024	0.0390192	1	NA	NA	NA	NA	NA	NA	NA
comp233669_c0_seq2	len=329	1.17902	1.57872	0.0469918	1	NA	NA	NA	NA	NA	NA	NA
comp178140_c0_seq2	len=449	-1.13802	0.562811	0.0238094	1	NA	NA	NA	NA	NA	NA	NA
comp243428_c0_seq1	len=536	-1.5774	0.512844	0.03502	1	NA	NA	NA	NA	NA	NA	NA
comp259106_c0_seq3	len=319	1.16296	-0.0895927	0.0391784	1	NA	NA	NA	NA	NA	NA	NA
comp257869_c1_seq1	len=372	1.18502	2.93376	0.0277777	1	NA	NA	NA	NA	NA	NA	NA
comp143829_c0_seq1	len=217	-1.09905	0.609642	0.035068	1	NA	NA	NA	NA	NA	NA	NA
comp261565_c0_seq1	len=451	-1.29898	2.71903	0.0350902	1	NA	NA	NA	NA	NA	NA	NA
comp260845_c3_seq5	len=1072	-1.12357	0.530227	0.0239452	1	NA	NA	NA	NA	NA	NA	NA
comp245669_c0_seq1	len=608	0.992196	1.38335	0.0474723	1	NA	NA	NA	NA	NA	NA	NA
comp255478_c1_seq2	len=3162	1.59221	1.4313	0.0393541	1	NA	NA	NA	NA	NA	NA	NA
comp244031_c0_seq1	len=280	-1.19754	0.848447	0.0393655	1	NA	NA	NA	NA	NA	NA	NA
comp234353_c0_seq1	len=395	1.67714	1.45905	0.0279306	1	NA	NA	NA	NA	NA	NA	NA
comp156417_c0_seq1	len=282	1.06569	0.374281	0.0240594	1	NA	NA	NA	NA	NA	NA	NA
comp223050_c0_seq1	len=629	1.19004	1.36688	0.0241057	1	NA	NA	NA	NA	NA	NA	NA
comp251472_c1_seq1	len=366	-1.11509	0.437214	0.0241423	1	NA	NA	NA	NA	NA	NA	NA
comp238226_c2_seq1	len=315	1.05667	0.428934	0.0354627	1	NA	NA	NA	NA	NA	NA	NA
comp252547_c0_seq2	len=780	-1.19637	2.80258	0.0321793	1	NA	NA	NA	NA	NA	NA	NA
comp241667_c0_seq1	len=846	1.51287	1.83325	0.0241808	1	NA	NA	NA	NA	NA	NA	NA
comp247861_c1_seq1	len=398	-1.39058	1.43325	0.0395452	1	NA	NA	NA	NA	NA	NA	NA
comp145148_c0_seq1	len=249	-1.08526	0.485853	0.0281413	1	NA	NA	NA	NA	NA	NA	NA
comp143142_c0_seq1	len=319	1.06777	0.738499	0.024199	1	NA	NA	NA	NA	NA	NA	NA
comp253246_c0_seq4	len=325	1.20018	1.38933	0.0479792	1	NA	NA	NA	NA	NA	NA	NA
comp216272_c1_seq1	len=257	0.95629	0.690209	0.0356368	1	NA	NA	NA	NA	NA	NA	NA
comp251710_c0_seq2	len=1199	2.26176	1.95728	0.0480449	1	NA	NA	NA	NA	NA	NA	NA
comp247027_c0_seq1	len=267	-1.1588	1.68143	0.0244192	1	NA	NA	NA	NA	NA	NA	NA
comp222527_c0_seq1	len=271	0.99143	0.500083	0.0356806	1	NA	NA	NA	NA	NA	NA	NA
comp231626_c0_seq1	len=529	-1.77418	1.51828	0.0357308	1	NA	NA	NA	NA	NA	NA	NA
comp240606_c1_seq2	len=1024	1.77375	1.86065	0.0244576	1	NA	NA	NA	NA	NA	NA	NA
comp243607_c0_seq1	len=245	-1.07561	0.626239	0.0480898	1	NA	NA	NA	NA	NA	NA	NA
comp254321_c3_seq1	len=654	-1.06142	1.71718	0.0358535	1	NA	NA	NA	NA	NA	NA	NA
comp207585_c0_seq1	len=592	1.11251	1.18469	0.0285497	1	NA	NA	NA	NA	NA	NA	NA
comp259676_c2_seq1	len=292	-1.28446	1.93249	0.0359081	1	NA	NA	NA	NA	NA	NA	NA
comp260769_c1_seq4	len=744	-1.01327	1.7995	0.0359093	1	NA	NA	NA	NA	NA	NA	NA
comp259566_c2_seq3	len=685	-1.18081	1.76699	0.0482387	1	NA	NA	NA	NA	NA	NA	NA
comp254858_c0_seq1	len=763	1.06104	2.50323	0.0403657	1	NA	NA	NA	NA	NA	NA	NA
comp258700_c0_seq17	len=259	1.45256	0.302489	0.0359744	1	NA	NA	NA	NA	NA	NA	NA
comp258528_c7_seq6	len=904	1.90583	6.20885	0.0249568	1	NA	NA	NA	NA	NA	NA	NA
comp254417_c0_seq1	len=1189	1.03181	3.03877	0.0360048	1	NA	NA	NA	NA	NA	NA	NA
comp261025_c0_seq3	len=266	-1.20542	1.15479	0.0288378	1	NA	NA	NA	NA	NA	NA	NA
comp241537_c0_seq1	len=327	1.07817	0.755625	0.0328778	1	NA	NA	NA	NA	NA	NA	NA
comp220026_c0_seq1	len=536	-1.08987	1.80798	0.03603	1	NA	NA	NA	NA	NA	NA	NA
comp259871_c0_seq1	len=1666	-1.06316	2.14714	0.0290553	1	NA	NA	NA	NA	NA	NA	NA
comp268508_c0_seq1	len=391	-1.54148	2.13535	0.0250695	1	NA	NA	NA	NA	NA	NA	NA
comp255298_c0_seq10	len=569	1.15071	0.535894	0.0442788	1	NA	NA	NA	NA	NA	NA	NA
comp241008_c1_seq1	len=691	0.986799	1.29434	0.026616	1	NA	NA	NA	NA	NA	NA	NA
comp243918_c1_seq1	len=219	-1.11228	0.774143	0.0251819	1	NA	NA	NA	NA	NA	NA	NA
comp245828_c0_seq1	len=414	-1.08909	2.21762	0.0251936	1	NA	NA	NA	NA	NA	NA	NA
comp260058_c1_seq1	len=521	0.952309	3.03372	0.0361644	1	NA	NA	NA	NA	NA	NA	NA
comp237594_c0_seq1	len=360	-1.3688	1.79391	0.0361818	1	NA	NA	NA	NA	NA	NA	NA
comp240667_c1_seq1	len=518	1.24031	1.04793	0.0253903	1	NA	NA	NA	NA	NA	NA	NA
comp256228_c3_seq6	len=805	1.08923	2.35092	0.0363028	1	NA	NA	NA	NA	NA	NA	NA
comp180796_c0_seq1	len=324	-1.10166	1.44891	0.0363171	1	NA	NA	NA	NA	NA	NA	NA
comp276441_c0_seq1	len=215	1.68179	1.3905	0.0331343	1	NA	NA	NA	NA	NA	NA	NA
comp217461_c0_seq1	len=441	-0.990069	2.6054	0.0331353	1	NA	NA	NA	NA	NA	NA	NA
comp222163_c0_seq1	len=337	1.09231	0.777857	0.0364492	1	NA	NA	NA	NA	NA	NA	NA
comp137386_c0_seq1	len=244	1.02439	0.12156	0.0295657	1	NA	NA	NA	NA	NA	NA	NA
comp237690_c0_seq1	len=389	-1.33041	1.28048	0.0365718	1	NA	NA	NA	NA	NA	NA	NA
comp256477_c1_seq2	len=610	1.16818	2.3532	0.0256221	1	NA	NA	NA	NA	NA	NA	NA
comp157983_c0_seq1	len=208	2.1408	1.88247	0.0256284	1	NA	NA	NA	NA	NA	NA	NA
comp260132_c0_seq6	len=308	-1.06546	1.45668	0.0366525	1	NA	NA	NA	NA	NA	NA	NA
comp221289_c0_seq1	len=275	-1.00833	0.385782	0.0366919	1	NA	NA	NA	NA	NA	NA	NA
comp262190_c0_seq4	len=371	-0.934152	2.66757	0.044822	1	NA	NA	NA	NA	NA	NA	NA
comp251120_c0_seq2	len=1327	-0.988558	2.83921	0.0367881	1	NA	NA	NA	NA	NA	NA	NA
comp259879_c1_seq3	len=1385	-1.31305	0.505834	0.0448765	1	NA	NA	NA	NA	NA	NA	NA
comp246491_c0_seq1	len=238	-1.14653	0.777346	0.036845	1	NA	NA	NA	NA	NA	NA	NA
comp220214_c0_seq1	len=315	-1.17821	0.271044	0.0410087	1	NA	NA	NA	NA	NA	NA	NA
comp247807_c0_seq2	len=1394	1.22309	1.87123	0.044927	1	NA	NA	NA	NA	NA	NA	NA
comp241457_c0_seq1	len=715	1.23107	1.74194	0.0449336	1	NA	NA	NA	NA	NA	NA	NA
comp259147_c2_seq3	len=644	1.18935	1.56728	0.0495416	1	NA	NA	NA	NA	NA	NA	NA
comp244047_c0_seq1	len=608	-1.281	1.72007	0.0259833	1	NA	NA	NA	NA	NA	NA	NA
comp259765_c0_seq2	len=269	-1.2297	1.33385	0.0299877	1	NA	NA	NA	NA	NA	NA	NA
comp257485_c0_seq1	len=414	1.07049	1.07055	0.0412	1	NA	NA	NA	NA	NA	NA	NA
comp240144_c0_seq1	len=292	-1.37948	1.05576	0.0371544	1	NA	NA	NA	NA	NA	NA	NA
comp258086_c0_seq5	len=237	1.04735	0.74233	0.0496336	1	NA	NA	NA	NA	NA	NA	NA
comp259647_c3_seq2	len=240	1.0304	1.38436	0.0300697	1	NA	NA	NA	NA	NA	NA	NA
comp261163_c4_seq2	len=362	-1.90587	2.84447	0.0301617	1	NA	NA	NA	NA	NA	NA	NA
comp243136_c2_seq1	len=438	-1.60033	0.640041	0.0263487	1	NA	NA	NA	NA	NA	NA	NA
comp234713_c1_seq1	len=246	1.01917	0.714076	0.0302226	1	NA	NA	NA	NA	NA	NA	NA
comp218324_c0_seq1	len=272	1.07078	0.986698	0.0374054	1	NA	NA	NA	NA	NA	NA	NA
comp241291_c0_seq2	len=582	-1.28011	0.767856	0.0264856	1	NA	NA	NA	NA	NA	NA	NA
comp406643_c0_seq1	len=342	-1.23979	0.912344	0.0264903	1	NA	NA	NA	NA	NA	NA	NA
comp212895_c0_seq1	len=426	0.986185	0.692777	0.0264961	1	NA	NA	NA	NA	NA	NA	NA
comp244766_c0_seq1	len=622	-1.76182	0.983441	0.0374702	1	NA	NA	NA	NA	NA	NA	NA
comp179165_c0_seq1	len=227	1.02398	0.194865	0.0375283	1	NA	NA	NA	NA	NA	NA	NA
comp261421_c0_seq7	len=330	-1.41052	1.36022	0.0318456	1	NA	NA	NA	NA	NA	NA	NA
comp225428_c1_seq1	len=329	1.03307	1.30962	0.0415452	1	NA	NA	NA	NA	NA	NA	NA
comp169280_c0_seq1	len=300	1.01645	3.16268	0.030626	1	NA	NA	NA	NA	NA	NA	NA
comp261596_c0_seq3	len=590	-1.06727	1.36593	0.0416046	1	NA	NA	NA	NA	NA	NA	NA
comp258199_c0_seq3	len=1158	-1.52583	0.483713	0.0266883	1	NA	NA	NA	NA	NA	NA	NA
comp238589_c0_seq2	len=439	0.983931	1.5039	0.0456932	1	NA	NA	NA	NA	NA	NA	NA
comp253620_c0_seq1	len=2211	-1.06188	4.47344	0.0377748	1	NA	NA	NA	NA	NA	NA	NA
comp220570_c0_seq1	len=648	1.16841	1.61535	0.0308268	1	NA	NA	NA	NA	NA	NA	NA
comp246975_c1_seq1	len=547	-1.076	1.85945	0.0269158	1	NA	NA	NA	NA	NA	NA	NA
comp177964_c0_seq1	len=303	1.154	1.62362	0.0378779	1	NA	NA	NA	NA	NA	NA	NA
comp264896_c0_seq1	len=243	1.59592	2.54607	0.0270053	1	NA	NA	NA	NA	NA	NA	NA
comp221266_c1_seq1	len=213	1.06644	0.729839	0.0270178	1	NA	NA	NA	NA	NA	NA	NA
comp236751_c1_seq1	len=560	-0.938382	1.41265	0.0417146	1	NA	NA	NA	NA	NA	NA	NA
comp189287_c0_seq1	len=271	1.32114	-0.105948	0.031011	1	NA	NA	NA	NA	NA	NA	NA
comp242072_c2_seq1	len=600	-1.68886	1.5257	0.0271097	1	NA	NA	NA	NA	NA	NA	NA
comp234380_c2_seq1	len=209	1.17713	0.543029	0.02713	1	NA	NA	NA	NA	NA	NA	NA
comp255691_c0_seq2	len=711	-1.66601	0.845447	0.0310999	1	NA	NA	NA	NA	NA	NA	NA
comp216409_c0_seq1	len=435	-1.13411	1.67145	0.0311374	1	NA	NA	NA	NA	NA	NA	NA
comp257577_c0_seq11	len=726	1.1069	0.683608	0.0272765	1	NA	NA	NA	NA	NA	NA	NA
comp261678_c0_seq16	len=1290	1.10093	0.900069	0.0272988	1	NA	NA	NA	NA	NA	NA	NA
comp254746_c2_seq1	len=1015	0.964375	3.5255	0.0383504	1	NA	NA	NA	NA	NA	NA	NA
comp229662_c0_seq1	len=255	1.06854	0.303659	0.0273319	1	NA	NA	NA	NA	NA	NA	NA
comp297113_c0_seq1	len=263	-1.18444	1.97329	0.0464489	1	NA	NA	NA	NA	NA	NA	NA
comp221654_c1_seq1	len=436	-1.16524	1.32072	0.0273583	1	NA	NA	NA	NA	NA	NA	NA
comp223766_c0_seq1	len=482	1.32847	1.10643	0.0386582	1	NA	NA	NA	NA	NA	NA	NA
comp224056_c0_seq1	len=313	1.71968	0.235081	0.0386932	1	NA	NA	NA	NA	NA	NA	NA
comp305269_c0_seq1	len=359	1.13935	1.34974	0.0387786	1	NA	NA	NA	NA	NA	NA	NA
comp239638_c0_seq1	len=934	1.32957	2.85993	0.027382	1	NA	NA	NA	NA	NA	NA	NA
comp250173_c0_seq2	len=413	0.948215	1.1742	0.0422978	1	NA	NA	NA	NA	NA	NA	NA
comp219444_c0_seq1	len=211	1.16507	0.0310082	0.0345792	1	NA	NA	NA	NA	NA	NA	NA
comp253909_c1_seq1	len=639	1.0129	3.29981	0.0402919	1	NA	NA	NA	NA	NA	NA	NA
comp242754_c1_seq1	len=318	0.909828	0.559485	0.0423478	1	NA	NA	NA	NA	NA	NA	NA
comp255733_c5_seq2	len=241	1.11368	1.46413	0.0274937	1	NA	NA	NA	NA	NA	NA	NA
comp247557_c0_seq1	len=321	0.981046	0.895638	0.0389855	1	NA	NA	NA	NA	NA	NA	NA
comp226100_c0_seq2	len=635	-0.964903	0.469326	0.0426375	1	NA	NA	NA	NA	NA	NA	NA
comp261772_c0_seq2	len=446	-1.54874	0.489785	0.0469717	1	NA	NA	NA	NA	NA	NA	NA
comp254558_c4_seq6	len=221	1.25623	0.522091	0.0316884	1	NA	NA	NA	NA	NA	NA	NA
comp245338_c3_seq1	len=463	1.19992	0.898749	0.0426392	1	NA	NA	NA	NA	NA	NA	NA
comp228870_c0_seq1	len=243	1.12743	0.918647	0.0349633	1	NA	NA	NA	NA	NA	NA	NA
comp250750_c4_seq1	len=1781	1.10911	0.591657	0.027751	1	NA	NA	NA	NA	NA	NA	NA
comp253519_c1_seq6	len=212	1.3967	1.18505	0.036055	1	NA	NA	NA	NA	NA	NA	NA
comp313691_c0_seq1	len=270	1.68788	1.78774	0.0426999	1	NA	NA	NA	NA	NA	NA	NA
comp261914_c1_seq1	len=215	-1.56655	2.02418	0.0318687	1	NA	NA	NA	NA	NA	NA	NA
comp283735_c0_seq1	len=211	-1.14333	2.02025	0.0392915	1	NA	NA	NA	NA	NA	NA	NA
comp260913_c1_seq3	len=331	-1.51144	0.877061	0.0427491	1	NA	NA	NA	NA	NA	NA	NA
comp260554_c1_seq13	len=219	1.08913	0.803532	0.0393084	1	NA	NA	NA	NA	NA	NA	NA
comp248739_c0_seq1	len=775	0.955263	2.02903	0.0319196	1	NA	NA	NA	NA	NA	NA	NA
comp208839_c0_seq1	len=242	-0.907996	0.845481	0.0428056	1	NA	NA	NA	NA	NA	NA	NA
comp198947_c0_seq1	len=433	-1.29995	1.58393	0.0293857	1	NA	NA	NA	NA	NA	NA	NA
comp220848_c0_seq1	len=282	1.0945	1.26147	0.0428403	1	NA	NA	NA	NA	NA	NA	NA
comp254898_c8_seq2	len=503	-2.11755	3.96101	0.032105	1	NA	NA	NA	NA	NA	NA	NA
comp258427_c0_seq7	len=761	0.925234	1.68601	0.0429186	1	NA	NA	NA	NA	NA	NA	NA
comp257155_c3_seq3	len=423	-1.17191	2.26324	0.0477626	1	NA	NA	NA	NA	NA	NA	NA
comp262011_c4_seq3	len=823	-2.21923	1.56639	0.0408701	1	NA	NA	NA	NA	NA	NA	NA
comp232384_c1_seq1	len=488	-1.01762	1.19804	0.039537	1	NA	NA	NA	NA	NA	NA	NA
comp256457_c0_seq1	len=721	1.79115	2.04087	0.0430135	1	NA	NA	NA	NA	NA	NA	NA
comp221108_c0_seq1	len=308	-1.13385	0.700202	0.0323132	1	NA	NA	NA	NA	NA	NA	NA
comp260765_c1_seq4	len=1871	0.893276	3.70656	0.0395629	1	NA	NA	NA	NA	NA	NA	NA
comp220544_c1_seq1	len=411	-1.11197	1.03751	0.0283482	1	NA	NA	NA	NA	NA	NA	NA
comp261001_c1_seq1	len=2530	1.48195	0.127813	0.0323585	1	NA	NA	NA	NA	NA	NA	NA
comp261460_c0_seq8	len=258	1.21716	1.19221	0.0283684	1	NA	NA	NA	NA	NA	NA	NA
comp244461_c0_seq2	len=424	1.03569	1.00862	0.0398453	1	NA	NA	NA	NA	NA	NA	NA
comp165537_c0_seq1	len=307	1.08471	0.438912	0.0356563	1	NA	NA	NA	NA	NA	NA	NA
comp234892_c1_seq1	len=237	-1.13621	0.482139	0.0399866	1	NA	NA	NA	NA	NA	NA	NA
comp262011_c4_seq2	len=2407	-2.40281	4.06212	0.0284972	1	NA	NA	NA	NA	NA	NA	NA
comp243679_c0_seq1	len=519	0.95434	1.65725	0.0435004	1	NA	NA	NA	NA	NA	NA	NA
comp253424_c2_seq1	len=885	-1.57076	4.08927	0.0285433	1	NA	NA	NA	NA	NA	NA	NA
comp237602_c2_seq1	len=276	1.03164	1.6181	0.0326658	1	NA	NA	NA	NA	NA	NA	NA
comp241992_c0_seq1	len=520	-1.16722	1.53037	0.0285842	1	NA	NA	NA	NA	NA	NA	NA
comp259264_c2_seq1	len=485	-1.32044	1.24125	0.0402844	1	NA	NA	NA	NA	NA	NA	NA
comp239655_c0_seq1	len=558	1.59489	1.14997	0.0387951	1	NA	NA	NA	NA	NA	NA	NA
comp253669_c0_seq3	len=485	-1.18432	0.519483	0.043804	1	NA	NA	NA	NA	NA	NA	NA
comp261777_c4_seq1	len=1159	-1.89653	1.77511	0.0287573	1	NA	NA	NA	NA	NA	NA	NA
comp245339_c1_seq2	len=1329	-1.3489	0.596663	0.0404244	1	NA	NA	NA	NA	NA	NA	NA
comp282648_c0_seq1	len=214	1.50365	1.4824	0.0359775	1	NA	NA	NA	NA	NA	NA	NA
comp245179_c1_seq3	len=240	1.03479	1.0985	0.0328702	1	NA	NA	NA	NA	NA	NA	NA
comp258064_c0_seq1	len=3044	-1.0366	6.32127	0.0404617	1	NA	NA	NA	NA	NA	NA	NA
comp221780_c1_seq1	len=430	-1.36989	1.10799	0.0441061	1	NA	NA	NA	NA	NA	NA	NA
comp136921_c0_seq1	len=315	-1.43765	1.88342	0.0485276	1	NA	NA	NA	NA	NA	NA	NA
comp202700_c0_seq1	len=305	-1.04888	1.52152	0.0329747	1	NA	NA	NA	NA	NA	NA	NA
comp238222_c0_seq1	len=606	1.25613	1.31767	0.0338693	1	NA	NA	NA	NA	NA	NA	NA
comp236676_c1_seq1	len=334	1.03813	1.70454	0.0305562	1	NA	NA	NA	NA	NA	NA	NA
comp232469_c1_seq1	len=598	1.34569	0.922551	0.0291898	1	NA	NA	NA	NA	NA	NA	NA
comp262486_c2_seq17	len=207	1.36154	0.26564	0.0292305	1	NA	NA	NA	NA	NA	NA	NA
comp186234_c0_seq1	len=336	-1.1488	0.291933	0.0292869	1	NA	NA	NA	NA	NA	NA	NA
comp241763_c2_seq1	len=297	-1.25317	0.609067	0.0293105	1	NA	NA	NA	NA	NA	NA	NA
comp240887_c0_seq1	len=1053	1.02267	2.11715	0.0293159	1	NA	NA	NA	NA	NA	NA	NA
comp258153_c2_seq1	len=216	1.03443	1.99061	0.0407018	1	NA	NA	NA	NA	NA	NA	NA
comp239977_c2_seq1	len=323	0.960243	0.905972	0.0457275	1	NA	NA	NA	NA	NA	NA	NA
comp246498_c0_seq1	len=714	-1.68977	1.64663	0.0416643	1	NA	NA	NA	NA	NA	NA	NA
comp234576_c0_seq1	len=271	1.09379	1.23688	0.0489287	1	NA	NA	NA	NA	NA	NA	NA
comp202178_c0_seq1	len=238	-1.85388	0.829862	0.0363714	1	NA	NA	NA	NA	NA	NA	NA
comp177672_c0_seq1	len=350	-1.05354	1.72675	0.0331846	1	NA	NA	NA	NA	NA	NA	NA
comp248586_c0_seq1	len=609	-1.11028	1.50989	0.0342476	1	NA	NA	NA	NA	NA	NA	NA
comp251857_c1_seq1	len=925	1.26735	-0.336061	0.0295993	1	NA	NA	NA	NA	NA	NA	NA
comp260832_c4_seq1	len=211	2.12916	1.5814	0.0332495	1	NA	NA	NA	NA	NA	NA	NA
comp255824_c5_seq1	len=812	1.20278	2.23129	0.0408883	1	NA	NA	NA	NA	NA	NA	NA
comp222473_c0_seq1	len=307	1.12085	0.56817	0.0332603	1	NA	NA	NA	NA	NA	NA	NA
comp255719_c0_seq1	len=204	-1.04864	1.17533	0.0492669	1	NA	NA	NA	NA	NA	NA	NA
comp252693_c0_seq1	len=1400	-1.33406	2.46347	0.0297176	1	NA	NA	NA	NA	NA	NA	NA
comp249489_c0_seq1	len=615	1.20855	3.71632	0.0409395	1	NA	NA	NA	NA	NA	NA	NA
comp265287_c0_seq1	len=460	1.22936	3.35338	0.0368322	1	NA	NA	NA	NA	NA	NA	NA
comp229344_c0_seq1	len=387	1.04698	1.25489	0.0398447	1	NA	NA	NA	NA	NA	NA	NA
comp260273_c3_seq1	len=289	1.2546	0.766536	0.0494266	1	NA	NA	NA	NA	NA	NA	NA
comp263566_c0_seq1	len=392	2.13807	4.92812	0.0312872	1	NA	NA	NA	NA	NA	NA	NA
comp250701_c0_seq1	len=591	1.90925	1.82086	0.0299434	1	NA	NA	NA	NA	NA	NA	NA
comp244833_c0_seq1	len=454	-1.00092	1.47649	0.041161	1	NA	NA	NA	NA	NA	NA	NA
comp262516_c0_seq8	len=597	-1.02877	0.837997	0.0334259	1	NA	NA	NA	NA	NA	NA	NA
comp258251_c4_seq1	len=338	-1.07331	1.2818	0.0496213	1	NA	NA	NA	NA	NA	NA	NA
comp249274_c0_seq2	len=273	-1.11183	0.755269	0.0345558	1	NA	NA	NA	NA	NA	NA	NA
comp254704_c0_seq1	len=409	-1.18223	1.90453	0.032721	1	NA	NA	NA	NA	NA	NA	NA
comp248785_c2_seq1	len=234	-1.22676	0.609362	0.0436856	1	NA	NA	NA	NA	NA	NA	NA
comp262373_c0_seq6	len=1605	-1.18446	2.38698	0.0413481	1	NA	NA	NA	NA	NA	NA	NA
comp168476_c0_seq1	len=258	0.939894	1.19631	0.0413703	1	NA	NA	NA	NA	NA	NA	NA
comp254037_c0_seq2	len=381	-1.16635	3.51866	0.0453463	1	NA	NA	NA	NA	NA	NA	NA
comp240482_c0_seq1	len=919	1.41316	4.66645	0.0302829	1	NA	NA	NA	NA	NA	NA	NA
comp131328_c0_seq1	len=202	1.76118	0.523697	0.041423	1	NA	NA	NA	NA	NA	NA	NA
comp203045_c1_seq1	len=210	1.39255	0.953767	0.0454068	1	NA	NA	NA	NA	NA	NA	NA
comp255348_c2_seq1	len=1092	1.20362	0.490555	0.0304266	1	NA	NA	NA	NA	NA	NA	NA
comp261665_c0_seq4	len=577	1.06332	0.457239	0.0455163	1	NA	NA	NA	NA	NA	NA	NA
comp259238_c0_seq2	len=2008	1.24227	1.72634	0.042694	1	NA	NA	NA	NA	NA	NA	NA
comp253942_c1_seq1	len=346	0.944747	0.825036	0.0471761	1	NA	NA	NA	NA	NA	NA	NA
comp178224_c0_seq1	len=656	0.954696	3.19083	0.0455873	1	NA	NA	NA	NA	NA	NA	NA
comp132750_c0_seq1	len=1259	-1.62034	4.19564	0.0339499	1	NA	NA	NA	NA	NA	NA	NA
comp137137_c0_seq1	len=201	1.05195	0.772051	0.0376381	1	NA	NA	NA	NA	NA	NA	NA
comp248984_c0_seq1	len=451	1.16184	1.55522	0.0416121	1	NA	NA	NA	NA	NA	NA	NA
comp241752_c1_seq1	len=608	-1.3616	2.11821	0.0377103	1	NA	NA	NA	NA	NA	NA	NA
comp249233_c3_seq2	len=534	-1.20648	1.32604	0.0308246	1	NA	NA	NA	NA	NA	NA	NA
comp176079_c0_seq1	len=204	1.00183	0.872509	0.0487732	1	NA	NA	NA	NA	NA	NA	NA
comp237327_c0_seq1	len=439	1.11182	2.36671	0.0487785	1	NA	NA	NA	NA	NA	NA	NA
comp237981_c0_seq1	len=357	1.37991	1.41315	0.0416653	1	NA	NA	NA	NA	NA	NA	NA
comp245918_c2_seq2	len=544	-1.09905	0.0878255	0.0416766	1	NA	NA	NA	NA	NA	NA	NA
comp231879_c1_seq2	len=855	1.22711	3.16588	0.0342154	1	NA	NA	NA	NA	NA	NA	NA
comp242226_c0_seq2	len=812	1.0856	1.30165	0.0489829	1	NA	NA	NA	NA	NA	NA	NA
comp242907_c0_seq1	len=302	0.917097	0.827926	0.0461297	1	NA	NA	NA	NA	NA	NA	NA
comp260361_c4_seq4	len=597	1.45135	0.261801	0.0417665	1	NA	NA	NA	NA	NA	NA	NA
comp261521_c1_seq1	len=342	-1.34438	1.17635	0.0417725	1	NA	NA	NA	NA	NA	NA	NA
comp232917_c0_seq1	len=420	-0.999689	1.31244	0.0380289	1	NA	NA	NA	NA	NA	NA	NA
comp256704_c1_seq1	len=525	1.11848	2.71857	0.0417846	1	NA	NA	NA	NA	NA	NA	NA
comp252547_c0_seq1	len=434	-1.10736	1.20487	0.0311703	1	NA	NA	NA	NA	NA	NA	NA
comp248070_c0_seq1	len=795	-0.919323	2.69591	0.0418678	1	NA	NA	NA	NA	NA	NA	NA
comp259085_c2_seq2	len=920	-0.965005	3.30519	0.04631	1	NA	NA	NA	NA	NA	NA	NA
comp236959_c0_seq1	len=473	-1.08033	0.999954	0.0382894	1	NA	NA	NA	NA	NA	NA	NA
comp142413_c0_seq1	len=293	-1.39065	0.501365	0.0384653	1	NA	NA	NA	NA	NA	NA	NA
comp261817_c2_seq1	len=236	1.02147	0.465639	0.0434681	1	NA	NA	NA	NA	NA	NA	NA
comp261318_c0_seq17	len=1013	-1.12416	0.666166	0.0421527	1	NA	NA	NA	NA	NA	NA	NA
comp259735_c1_seq13	len=522	-1.14825	1.68164	0.0313087	1	NA	NA	NA	NA	NA	NA	NA
comp256925_c0_seq4	len=427	-1.06418	2.22022	0.0422165	1	NA	NA	NA	NA	NA	NA	NA
comp249489_c0_seq2	len=407	1.26606	2.32865	0.0466578	1	NA	NA	NA	NA	NA	NA	NA
comp201541_c0_seq1	len=423	1.05723	0.94588	0.0436388	1	NA	NA	NA	NA	NA	NA	NA
comp259722_c1_seq3	len=475	-1.0135	2.40015	0.0387936	1	NA	NA	NA	NA	NA	NA	NA
comp173544_c0_seq1	len=225	1.14513	0.295905	0.0482212	1	NA	NA	NA	NA	NA	NA	NA
comp256351_c0_seq1	len=821	-1.09821	1.21646	0.0482327	1	NA	NA	NA	NA	NA	NA	NA
comp222990_c0_seq1	len=871	1.02315	1.32703	0.0316482	1	NA	NA	NA	NA	NA	NA	NA
comp253323_c0_seq3	len=600	-1.11464	2.78488	0.0316708	1	NA	NA	NA	NA	NA	NA	NA
comp255870_c0_seq1	len=375	1.01811	0.580293	0.0469712	1	NA	NA	NA	NA	NA	NA	NA
comp243677_c0_seq2	len=345	1.14294	1.3291	0.0389869	1	NA	NA	NA	NA	NA	NA	NA
comp244378_c0_seq1	len=588	-1.38812	2.11495	0.0453932	1	NA	NA	NA	NA	NA	NA	NA
comp252290_c2_seq1	len=403	-1.88528	0.575397	0.0374533	1	NA	NA	NA	NA	NA	NA	NA
comp253530_c0_seq1	len=270	1.00462	1.26214	0.0485098	1	NA	NA	NA	NA	NA	NA	NA
comp258766_c3_seq1	len=318	1.03555	1.97949	0.0485365	1	NA	NA	NA	NA	NA	NA	NA
comp232233_c0_seq1	len=991	-1.35517	1.29466	0.0498322	1	NA	NA	NA	NA	NA	NA	NA
comp262246_c0_seq2	len=464	-1.15593	1.62424	0.0472377	1	NA	NA	NA	NA	NA	NA	NA
comp260358_c0_seq2	len=2510	1.02425	1.31254	0.0392304	1	NA	NA	NA	NA	NA	NA	NA
comp180037_c0_seq1	len=531	1.31777	2.14742	0.0427142	1	NA	NA	NA	NA	NA	NA	NA
comp254142_c0_seq4	len=1714	1.43394	1.89628	0.0473881	1	NA	NA	NA	NA	NA	NA	NA
comp387991_c0_seq1	len=233	-1.17542	-0.135489	0.0427987	1	NA	NA	NA	NA	NA	NA	NA
comp155909_c0_seq1	len=371	-1.21304	1.30487	0.035128	1	NA	NA	NA	NA	NA	NA	NA
comp261797_c0_seq1	len=474	-1.93833	1.19445	0.0499708	1	NA	NA	NA	NA	NA	NA	NA
comp253489_c2_seq1	len=221	-1.17022	0.652305	0.0416232	1	NA	NA	NA	NA	NA	NA	NA
comp251662_c0_seq1	len=262	-1.068	1.49609	0.0457439	1	NA	NA	NA	NA	NA	NA	NA
comp260072_c4_seq4	len=546	1.16741	0.906121	0.035313	1	NA	NA	NA	NA	NA	NA	NA
comp255105_c0_seq4	len=462	-1.41829	1.64173	0.0353898	1	NA	NA	NA	NA	NA	NA	NA
comp214164_c0_seq1	len=655	1.04903	1.41225	0.0428877	1	NA	NA	NA	NA	NA	NA	NA
comp248976_c0_seq1	len=693	-1.10355	2.43215	0.0446793	1	NA	NA	NA	NA	NA	NA	NA
comp242918_c3_seq1	len=411	-1.27995	1.13595	0.0322013	1	NA	NA	NA	NA	NA	NA	NA
comp262120_c0_seq3	len=203	-1.06913	0.33657	0.0355287	1	NA	NA	NA	NA	NA	NA	NA
comp247306_c1_seq1	len=440	1.01953	0.719523	0.0447554	1	NA	NA	NA	NA	NA	NA	NA
comp260670_c0_seq1	len=393	-1.55674	1.03618	0.0431287	1	NA	NA	NA	NA	NA	NA	NA
comp175946_c0_seq1	len=277	1.03797	0.911714	0.0356098	1	NA	NA	NA	NA	NA	NA	NA
comp255704_c6_seq1	len=286	0.992787	0.529524	0.0395725	1	NA	NA	NA	NA	NA	NA	NA
comp251366_c5_seq1	len=296	-1.08587	0.76638	0.032369	1	NA	NA	NA	NA	NA	NA	NA
comp197758_c0_seq1	len=239	0.988448	0.864271	0.0479965	1	NA	NA	NA	NA	NA	NA	NA
comp346271_c0_seq1	len=266	-1.49701	0.184773	0.0433918	1	NA	NA	NA	NA	NA	NA	NA
comp223046_c0_seq2	len=347	-1.10614	1.0258	0.046296	1	NA	NA	NA	NA	NA	NA	NA
comp134130_c0_seq1	len=288	-1.11911	1.56731	0.032608	1	NA	NA	NA	NA	NA	NA	NA
comp216660_c0_seq1	len=209	1.30695	4.41865	0.0357812	1	NA	NA	NA	NA	NA	NA	NA
comp257228_c0_seq2	len=545	-0.992391	2.27257	0.0435295	1	NA	NA	NA	NA	NA	NA	NA
comp247861_c0_seq1	len=237	-1.66212	0.659835	0.0401804	1	NA	NA	NA	NA	NA	NA	NA
comp218359_c0_seq1	len=307	-1.02287	0.480956	0.0411729	1	NA	NA	NA	NA	NA	NA	NA
comp224223_c0_seq1	len=802	-1.03283	0.778372	0.0402142	1	NA	NA	NA	NA	NA	NA	NA
comp250888_c1_seq1	len=901	0.941698	2.62987	0.043607	1	NA	NA	NA	NA	NA	NA	NA
comp236407_c0_seq2	len=410	1.13747	1.92738	0.0402634	1	NA	NA	NA	NA	NA	NA	NA
comp255591_c1_seq1	len=498	1.27655	0.649893	0.0436575	1	NA	NA	NA	NA	NA	NA	NA
comp254558_c4_seq3	len=386	-1.07204	1.50071	0.0328469	1	NA	NA	NA	NA	NA	NA	NA
comp262340_c0_seq5	len=684	0.991256	1.15728	0.0440537	1	NA	NA	NA	NA	NA	NA	NA
comp261690_c1_seq10	len=223	1.21493	0.998588	0.0483679	1	NA	NA	NA	NA	NA	NA	NA
comp262389_c3_seq6	len=564	2.16794	0.560947	0.0413812	1	NA	NA	NA	NA	NA	NA	NA
comp211979_c0_seq1	len=302	-0.971171	0.859949	0.0497555	1	NA	NA	NA	NA	NA	NA	NA
comp196805_c0_seq1	len=477	1.02948	1.77832	0.0374567	1	NA	NA	NA	NA	NA	NA	NA
comp213015_c0_seq1	len=501	-2.33148	2.36579	0.0374641	1	NA	NA	NA	NA	NA	NA	NA
comp215311_c1_seq1	len=350	-1.11862	0.404719	0.035006	1	NA	NA	NA	NA	NA	NA	NA
comp233286_c1_seq1	len=215	1.05513	2.58895	0.0498501	1	NA	NA	NA	NA	NA	NA	NA
comp254041_c0_seq1	len=694	-1.52666	2.22828	0.0498601	1	NA	NA	NA	NA	NA	NA	NA
comp260461_c0_seq1	len=1218	-1.81198	4.97772	0.0360905	1	NA	NA	NA	NA	NA	NA	NA
comp260840_c0_seq7	len=1152	-1.93165	0.56421	0.036136	1	NA	NA	NA	NA	NA	NA	NA
comp253730_c1_seq2	len=269	-0.927404	0.976137	0.0444943	1	NA	NA	NA	NA	NA	NA	NA
comp241295_c0_seq1	len=373	1.27937	1.72947	0.0487363	1	NA	NA	NA	NA	NA	NA	NA
comp261609_c1_seq8	len=202	-1.13147	1.1128	0.0343903	1	NA	NA	NA	NA	NA	NA	NA
comp227364_c0_seq1	len=497	1.00234	0.796851	0.0406915	1	NA	NA	NA	NA	NA	NA	NA
comp203915_c0_seq1	len=791	1.50467	1.49454	0.0463	1	NA	NA	NA	NA	NA	NA	NA
comp221287_c0_seq1	len=354	-1.17748	1.53031	0.0457621	1	NA	NA	NA	NA	NA	NA	NA
comp221780_c0_seq1	len=501	-1.16095	1.72548	0.0446019	1	NA	NA	NA	NA	NA	NA	NA
comp255290_c1_seq5	len=385	-1.19092	1.44448	0.0465319	1	NA	NA	NA	NA	NA	NA	NA
comp255907_c1_seq3	len=865	1.26021	3.01702	0.0379136	1	NA	NA	NA	NA	NA	NA	NA
comp261356_c4_seq1	len=229	1.01984	1.38219	0.0446882	1	NA	NA	NA	NA	NA	NA	NA
comp246254_c1_seq1	len=767	-1.09145	2.94955	0.0366035	1	NA	NA	NA	NA	NA	NA	NA
comp261945_c2_seq18	len=260	1.1275	2.92666	0.034283	1	NA	NA	NA	NA	NA	NA	NA
comp259505_c1_seq5	len=1270	2.17898	1.42084	0.049258	1	NA	NA	NA	NA	NA	NA	NA
comp179433_c0_seq1	len=253	-1.06594	0.437931	0.0447815	1	NA	NA	NA	NA	NA	NA	NA
comp193739_c0_seq1	len=592	0.944847	7.25738	0.049323	1	NA	NA	NA	NA	NA	NA	NA
comp245869_c1_seq1	len=1028	-1.24752	3.87065	0.0336587	1	NA	NA	NA	NA	NA	NA	NA
comp238074_c0_seq1	len=609	1.00479	1.60272	0.0382712	1	NA	NA	NA	NA	NA	NA	NA
comp261193_c3_seq1	len=1151	-1.16673	0.590079	0.0373921	1	NA	NA	NA	NA	NA	NA	NA
comp239563_c0_seq1	len=1145	-2.18903	0.757673	0.0469135	1	NA	NA	NA	NA	NA	NA	NA
comp257291_c3_seq15	len=482	1.20975	0.821757	0.0419314	1	NA	NA	NA	NA	NA	NA	NA
comp247093_c3_seq1	len=466	-1.0844	0.538649	0.0342027	1	NA	NA	NA	NA	NA	NA	NA
comp258981_c0_seq2	len=436	1.09206	0.585082	0.0411429	1	NA	NA	NA	NA	NA	NA	NA
comp202377_c0_seq1	len=236	1.60566	0.645453	0.0371138	1	NA	NA	NA	NA	NA	NA	NA
comp261040_c0_seq1	len=2209	-0.974167	0.273961	0.0465837	1	NA	NA	NA	NA	NA	NA	NA
comp246816_c0_seq1	len=305	1.18353	2.65891	0.0450106	1	NA	NA	NA	NA	NA	NA	NA
comp150477_c0_seq1	len=698	1.34702	4.16469	0.0495466	1	NA	NA	NA	NA	NA	NA	NA
comp169516_c0_seq1	len=1325	1.51123	5.34632	0.0455946	1	NA	NA	NA	NA	NA	NA	NA
comp159764_c0_seq1	len=246	2.11216	3.64058	0.0498996	1	NA	NA	NA	NA	NA	NA	NA
comp254179_c4_seq1	len=944	-1.09055	2.83972	0.0486773	1	NA	NA	NA	NA	NA	NA	NA
comp129502_c0_seq1	len=510	-1.53176	1.06094	0.0497144	1	NA	NA	NA	NA	NA	NA	NA
comp176136_c0_seq1	len=336	-1.20492	1.57844	0.0347288	1	NA	NA	NA	NA	NA	NA	NA
comp254800_c1_seq1	len=250	-0.961526	1.01226	0.0433161	1	NA	NA	NA	NA	NA	NA	NA
[truncated: 43 more rows]

## Sheet: Zn ions vs control
gene	length	logFC	logCPM	PValue	FDR	HitName	HitDesc	HitSignif	HSP_rank	X,ID	eValue	HSP_length
comp260819_c0_seq2	len=3855	9.21098	4.00049	6.4e-13	1.18e-08	sp|P11940|PABP1_HUMAN	Polyadenylate-binding protein 1 OS=Homo sapiens GN=PABPC1 PE=1 SV=2	0	1	65.1757	0	626
comp262514_c0_seq1	len=4423	9.0207	1.24277	4.12e-12	3.25e-08	sp|P35580|MYH10_HUMAN	Myosin-10 OS=Homo sapiens GN=MYH10 PE=1 SV=3	0	1	57.8001	0	1391
comp236455_c0_seq1	len=504	-5.28178	1.34056	3.63e-11	2.23e-07	sp|Q8VHE6|DYH5_MOUSE	Dynein heavy chain 5		NA			NA
comp466467_c0_seq1	len=461	-7.85213	0.317606	4.35e-11	2.41e-07	sp|P04571|SCP_HEDDI	Sarcoplasmic calcium-binding protein OS=Hediste diversicolor PE=1 SV=1	3e-25	1	34.8684	3e-25	152
comp236455_c1_seq1	len=1344	-4.57923	2.90501	1.74e-10	6.88e-07	sp|Q8VHE6|DYH5_MOUSE	Dynein heavy chain 5		NA			NA
comp261777_c2_seq2	len=5013	-5.74142	2.05391	2.1e-10	7.73e-07	sp|Q8C419|GP158_MOUSE	Probable G-protein coupled receptor 158 OS=Mus musculus GN=Gpr158 PE=1 SV=2	5e-14	1	37.931	5e-14	116
comp258979_c0_seq4	len=2693	-4.22855	0.483485	5.02e-10	1.54e-06	sp|Q60803|TRAF3_MOUSE	TNF receptor-associated factor 3 OS=Mus musculus GN=Traf3 PE=1 SV=2	1e-118	1	37.5465	1e-118	538
comp281300_c0_seq1	len=525	6.38012	2.37013	1.86e-09	4.9e-06	sp|P80192|M3K9_HUMAN	Mitogen-activated protein kinase kinase kinase 9 OS=Homo sapiens GN=MAP3K9 PE=1 SV=3	3e-21	1	37.5	3e-21	144
comp257997_c0_seq2	len=1126	8.13453	1.15965	5.77e-09	1.18e-05	sp|Q9C040|TRIM2_HUMAN	Tripartite motif-containing protein 2 OS=Homo sapiens GN=TRIM2 PE=1 SV=1	3e-08	1	27.1084	3e-08	166
comp260028_c0_seq4	len=2643	5.4852	1.15241	7.82e-08	0.000123521	sp|Q9WVE8|PACN2_MOUSE	Protein kinase C and casein kinase substrate in neurons protein 2 OS=Mus musculus GN=Pacsin2 PE=1 SV=1	1e-91	1	34.8643	1e-91	479
comp234634_c0_seq1	len=590	-4.00378	1.36259	9.39e-08	0.000144247	sp|Q8TE73|DYH5_HUMAN	Dynein heavy chain 5		NA			NA
comp217491_c1_seq1	len=854	-4.1575	2.71792	1.96e-07	0.000257761	sp|P42519|STAR_DROME	Protein Star OS=Drosophila melanogaster GN=S PE=2 SV=1	4e-11	1	33.6364	4e-11	110
comp261694_c1_seq6	len=444	4.39112	1.25965	3.65e-07	0.000429694	sp|Q02779|M3K10_HUMAN	Mitogen-activated protein kinase kinase kinase 10 OS=Homo sapiens GN=MAP3K10 PE=1 SV=3	6e-17	1	34.5865	6e-17	133
comp262136_c0_seq2	len=4736	4.38372	1.04862	1.56e-06	0.00148608	sp|Q91VE0|S27A4_MOUSE	Long-chain fatty acid transport protein 4 OS=Mus musculus GN=Slc27a4 PE=1 SV=1	0	1	49.6914	0	648
comp237505_c3_seq2	len=2064	-4.55966	4.96789	1.87e-06	0.00169895	sp|Q9D733|GP2_MOUSE	Pancreatic secretory granule membrane major glycoprotein GP2 OS=Mus musculus GN=Gp2 PE=2 SV=3	5e-19	1	35.5072	5e-19	138
comp252213_c0_seq1	len=1528	3.46064	0.281737	2.76e-06	0.00246088	sp|A6QQF5|QORL2_BOVIN	Quinone oxidoreductase-like protein 2 OS=Bos taurus PE=2 SV=2	4e-14	1	25.256	4e-14	293
comp262123_c3_seq1	len=791	5.14224	3.57584	4.17e-06	0.00355043	sp|Q2KHU5|MACD1_BOVIN	O-acetyl-ADP-ribose deacetylase MACROD1 OS=Bos taurus GN=MACROD1 PE=2 SV=1	8e-25	1	44.4444	8e-25	126
comp239138_c0_seq1	len=1035	4.36325	1.36468	5.13e-06	0.00404953	sp|Q21974|UNC8_CAEEL	Degenerin unc-8 OS=Caenorhabditis elegans GN=unc-8 PE=2 SV=1	7e-24	1	32.5472	7e-24	212
comp244822_c0_seq4	len=920	-2.49555	2.71409	5.2e-06	0.00404953	sp|P10610|CP2G1_RAT	Cytochrome P450 2G1 OS=Rattus norvegicus GN=Cyp2g1 PE=2 SV=1	8e-18	1	35.5556	8e-18	180
comp260123_c0_seq2	len=2881	-3.85651	-0.0308157	9.58e-06	0.00703775	sp|A7E3W5|SNG2_BOVIN	Synaptogyrin-2 OS=Bos taurus GN=SYNGR2 PE=2 SV=1	8e-26	1	35.9116	8e-26	181
comp262123_c1_seq15	len=1823	4.43002	3.63913	9.6e-06	0.00703775	sp|Q3UYG8|MACD2_MOUSE	O-acetyl-ADP-ribose deacetylase MACROD2 OS=Mus musculus GN=Macrod2 PE=2 SV=1	3e-15	1	41.0714	3e-15	112
comp258081_c0_seq6	len=1891	-5.18939	0.730039	1.64e-05	0.0109205	sp|Q7ZYJ9|AASDB_XENLA	Alanyl-tRNA editing protein Aarsd1-B OS=Xenopus laevis GN=aarsd1-b PE=2 SV=1	1e-161	1	56.7237	1e-161	409
comp237394_c1_seq1	len=557	2.35467	1.2056	2.45e-05	0.0153902	sp|Q0P4P2|FBCD1_XENTR	Fibrinogen C domain-containing protein 1 OS=Xenopus tropicalis GN=fibcd1 PE=2 SV=1	8e-26	1	55.3191	8e-26	94
comp248483_c0_seq15	len=230	6.58037	-0.00795646	2.57e-05	0.015952	sp|Q8TDY8|IGDC4_HUMAN	Immunoglobulin superfamily DCC subclass member 4 OS=Homo sapiens GN=IGDCC4 PE=1 SV=1	2e-09	1	36.4865	2e-09	74
comp254015_c0_seq4	len=1608	3.72988	3.08252	6.76e-05	0.0372923	sp|Q8N2E2|VWDE_HUMAN	von Willebrand factor D and EGF domain-containing protein OS=Homo sapiens GN=VWDE PE=2 SV=4	3e-11	1	26.7081	3e-11	161
comp257331_c0_seq17	len=934	4.32018	2.02601	6.81e-05	0.0372923	sp|Q9Y264|ANGP4_HUMAN	Angiopoietin-4 OS=Homo sapiens GN=ANGPT4 PE=1 SV=1	2e-23	1	42.3529	2e-23	170
comp254032_c0_seq1	len=1317	-2.32361	0.337255	8.16e-05	0.0430017	sp|Q7PKS9|MTNA_ANOGA	Methylthioribose-1-phosphate isomerase OS=Anopheles gambiae GN=AGAP001589 PE=3 SV=1	1e-140	1	59.0909	1e-140	352
comp233101_c0_seq1	len=553	2.40736	1.07878	0.000104499	0.0540181	sp|Q5RD31|NQO1_PONAB	NAD(P)H dehydrogenase [quinone] 1 OS=Pongo abelii GN=NQO1 PE=2 SV=1	1e-14	1	33.0769	1e-14	130
comp252780_c1_seq1	len=933	2.0078	3.25998	0.000120802	0.0600339	sp|Q60738|ZNT1_MOUSE	Zinc transporter 1 OS=Mus musculus GN=Slc30a1 PE=2 SV=1	2e-40	1	41.3793	2e-40	232
comp259935_c0_seq5	len=2930	4.61028	3.40128	0.000127559	0.0624372	sp|Q6AY30|SCPDL_RAT	Saccharopine dehydrogenase-like oxidoreductase OS=Rattus norvegicus GN=Sccpdh PE=2 SV=1	1e-118	1	43.1604	1e-118	424
comp258226_c1_seq2	len=1044	-5.21117	-0.294781	0.000139562	0.066546	sp|Q460N5|PAR14_HUMAN	Poly [ADP-ribose] polymerase 14 OS=Homo sapiens GN=PARP14 PE=1 SV=3	3e-12	1	22.3975	3e-12	317
comp255057_c0_seq2	len=4036	3.47914	0.464415	0.000143572	0.0672977	sp|P10079|FBP1_STRPU	Fibropellin-1 OS=Strongylocentrotus purpuratus GN=EGF1 PE=1 SV=2	2e-25	1	44.1176	2e-25	136
comp259462_c0_seq2	len=2370	-2.46931	0.170637	0.000235487	0.0964816	sp|Q800L3|MED22_CHICK	Mediator of RNA polymerase II transcription subunit 22 OS=Gallus gallus GN=MED22 PE=3 SV=1	4e-43	1	54.5455	4e-43	143
comp257158_c0_seq2	len=4555	2.51519	0.561999	0.000239396	0.0968175	sp|Q804S5|MIB1_DANRE	E3 ubiquitin-protein ligase mib1 OS=Danio rerio GN=mib1 PE=1 SV=1	0	1	73.913	0	1058
comp152781_c0_seq1	len=209	-1.88621	0.12461	0.000376869	0.138523	sp|Q13733|AT1A4_HUMAN	Sodium/potassium-transporting ATPase subunit alpha-4 OS=Homo sapiens GN=ATP1A4 PE=1 SV=3	8e-06	1	47.3684	8e-06	38
comp244025_c0_seq2	len=356	1.78846	1.32479	0.000454519	0.156148	sp|Q4LDE5|SVEP1_HUMAN	Sushi		NA			NA
comp239382_c0_seq1	len=658	-2.07137	2.36403	0.000477969	0.160846	sp|Q8TD10|MIPO1_HUMAN	Mirror-image polydactyly gene 1 protein OS=Homo sapiens GN=MIPOL1 PE=2 SV=1	9e-18	1	33.1361	9e-18	169
comp262034_c0_seq1	len=2435	-2.06437	2.76323	0.000530824	0.171698	sp|Q99KC8|VMA5A_MOUSE	von Willebrand factor A domain-containing protein 5A OS=Mus musculus GN=Vwa5a PE=1 SV=2	1e-125	1	35.0129	1e-125	774
comp260858_c0_seq3	len=999	-2.79363	1.52271	0.000555189	0.177262	sp|P37167|ACTP_ACACA	Actophorin OS=Acanthamoeba castellanii PE=1 SV=2	8e-35	1	45.8015	8e-35	131
comp211156_c0_seq1	len=364	1.84174	0.704716	0.000564951	0.17856	sp|Q7M3K2|PELET_DROME	Transposable element P transposase OS=Drosophila melanogaster GN=T PE=1 SV=2	7e-13	1	38.6139	7e-13	101
comp255528_c2_seq4	len=266	-2.34076	1.32253	0.000581926	0.182473	sp|P83039|ICHY_CAIMO	Chymotrypsin inhibitor OS=Cairina moschata PE=1 SV=1	3e-12	1	52.1739	3e-12	46
comp234699_c1_seq1	len=494	3.54577	3.0711	0.000594975	0.183847	sp|P04572|SCP_PERVT	Sarcoplasmic calcium-binding protein OS=Perinereis vancaurica tetradentata PE=1 SV=1	9e-13	1	25.8278	9e-13	151
comp241047_c0_seq2	len=1150	2.61035	2.49004	0.000615511	0.188091	sp|Q96MU6|ZN778_HUMAN	Zinc finger protein 778 OS=Homo sapiens GN=ZNF778 PE=2 SV=3	2e-38	1	39.3443	2e-38	183
comp189633_c0_seq1	len=267	-2.0625	0.070345	0.000654663	0.197869	sp|Q54VM3|TBC5A_DICDI	TBC1 domain family member 5 homolog A OS=Dictyostelium discoideum GN=tbc1d5A PE=1 SV=1	7e-07	1	32.5581	7e-07	86
comp257296_c1_seq2	len=1423	2.74562	2.40049	0.000820311	0.23109	sp|Q9NQ86|TRI36_HUMAN	E3 ubiquitin-protein ligase TRIM36 OS=Homo sapiens GN=TRIM36 PE=2 SV=2	2e-16	1	24.933	2e-16	373
comp320704_c0_seq1	len=253	-3.21585	1.25936	0.000851904	0.235598	sp|A0JM12|MEG10_XENTR	Multiple epidermal growth factor-like domains protein 10 OS=Xenopus tropicalis GN=megf10 PE=2 SV=1	1e-08	1	34.9398	1e-08	83
comp129418_c0_seq1	len=1287	-2.71974	2.26268	0.000862986	0.237476	sp|P14912|4CL1_PETCR	4-coumarate--CoA ligase 1 OS=Petroselinum crispum GN=4CL1 PE=2 SV=1	1e-56	1	36.9775	1e-56	311
comp254826_c1_seq2	len=1346	2.05112	1.41143	0.000926913	0.253804	sp|P55006|RDH7_RAT	Retinol dehydrogenase 7 OS=Rattus norvegicus GN=Rdh7 PE=2 SV=1	6e-63	1	41.3194	6e-63	288
comp207422_c1_seq1	len=237	-3.13101	0.235398	0.00102077	0.272753	sp|Q23023|UNC51_CAEEL	Serine/threonine-protein kinase unc-51 OS=Caenorhabditis elegans GN=unc-51 PE=1 SV=1	6e-14	1	45.0704	6e-14	71
comp247178_c0_seq1	len=327	2.06457	1.05545	0.00105202	0.277408	sp|Q9BRZ2|TRI56_HUMAN	E3 ubiquitin-protein ligase TRIM56 OS=Homo sapiens GN=TRIM56 PE=1 SV=3	3e-07	1	24.7788	3e-07	113
comp241178_c1_seq1	len=858	-2.22549	1.62516	0.00110112	0.284598	sp|Q5RJ80|CAPR2_DANRE	Caprin-2 OS=Danio rerio GN=caprin2 PE=2 SV=1	1e-14	1	34.5588	1e-14	136
comp250245_c0_seq2	len=946	-1.87627	3.61841	0.001249	0.311188	sp|Q2YDW7|SETD8_MOUSE	N-lysine methyltransferase SETD8 OS=Mus musculus GN=Setd8 PE=2 SV=1	2e-15	1	39.0909	2e-15	110
comp153060_c0_seq1	len=213	-1.54247	0.767118	0.00131763	0.322476	sp|A6QQF5|QORL2_BOVIN	Quinone oxidoreductase-like protein 2 OS=Bos taurus PE=2 SV=2	5e-08	1	41.0714	5e-08	56
comp243591_c3_seq1	len=286	-1.66755	0.475437	0.00133176	0.324496	sp|Q9VSL7|FOI_DROME	Zinc transporter foi OS=Drosophila melanogaster GN=foi PE=1 SV=3	3e-06	1	70.3704	3e-06	27
comp261861_c2_seq9	len=3029	2.38999	1.04413	0.00147354	0.346215	sp|Q3TZZ7|ESYT2_MOUSE	Extended synaptotagmin-2 OS=Mus musculus GN=Esyt2 PE=1 SV=1	1e-124	1	31.8584	1e-124	791
comp261791_c0_seq3	len=274	4.93082	0.198672	0.00150891	0.352149	sp|Q14315|FLNC_HUMAN	Filamin-C OS=Homo sapiens GN=FLNC PE=1 SV=3	2e-09	1	38.0282	2e-09	71
comp248936_c0_seq1	len=2804	-1.40362	7.75291	0.00162532	0.368998	sp|A7YWP4|HUTH_BOVIN	Histidine ammonia-lyase OS=Bos taurus GN=HAL PE=2 SV=1	0	1	61.2598	0	635
comp243136_c0_seq1	len=748	1.86442	1.68026	0.00163295	0.368998	sp|Q96M20|CNBD2_HUMAN	Cyclic nucleotide-binding domain-containing protein 2 OS=Homo sapiens GN=CNBD2 PE=2 SV=2	2e-18	1	27.2277	2e-18	202
comp236204_c1_seq1	len=775	2.5992	3.38246	0.00166676	0.368998	sp|Q3LX99|TXLR3_EISFO	Lysenin-related protein 3 OS=Eisenia foetida PE=2 SV=1	2e-30	1	56	2e-30	100
comp260498_c1_seq5	len=1250	2.21657	3.70514	0.00167622	0.368998	sp|Q7SIB3|CO4A2_BOVIN	Collagen alpha-2(IV) chain (Fragment) OS=Bos taurus GN=COL4A2 PE=1 SV=1	4e-64	1	43.379	4e-64	219
comp252504_c0_seq1	len=2308	2.47121	1.31187	0.00168255	0.368998	sp|Q40082|XYLA_HORVU	Xylose isomerase OS=Hordeum vulgare GN=XYLA PE=1 SV=1	1e-174	1	57.3394	1e-174	436
comp246287_c0_seq1	len=497	-1.50015	0.800493	0.00184718	0.394173	sp|Q24372|LACH_DROME	Lachesin OS=Drosophila melanogaster GN=Lac PE=2 SV=2	4e-15	1	32.0513	4e-15	156
comp221599_c0_seq1	len=485	-2.02554	1.41603	0.00187503	0.395838	sp|P16065|GCY_STRPU	Speract receptor OS=Strongylocentrotus purpuratus PE=2 SV=1	2e-21	1	30.8642	2e-21	162
comp262491_c1_seq2	len=319	2.65597	0.693627	0.00245355	0.472852	sp|Q95UN8|M3KSL_DROME	Mitogen-activated protein kinase kinase kinase OS=Drosophila melanogaster GN=slpr PE=1 SV=1	2e-12	1	38.7387	2e-12	111
comp255936_c1_seq2	len=3024	2.9775	0.133569	0.0024629	0.473006	sp|P29375|KDM5A_HUMAN	Lysine-specific demethylase 5A OS=Homo sapiens GN=KDM5A PE=1 SV=3	4e-34	1	28.4574	4e-34	376
comp261555_c1_seq8	len=2492	2.13632	1.56163	0.00249516	0.477542	sp|P34528|YM67_CAEEL	Putative serine protease K12H4,7 OS=Caenorhabditis elegans GN=K12H4,7 PE=3 SV=2	4e-12	1	47.1264	4e-12	87
comp259716_c0_seq2	len=2823	2.29825	0.211547	0.0025615	0.488549	sp|A2T737|EHF_PANTR	ETS homologous factor OS=Pan troglodytes GN=EHF PE=3 SV=1	2e-17	1	43.299	2e-17	97
comp253089_c1_seq2	len=883	1.66139	2.09497	0.00264148	0.498644	sp|Q5RHP9|CA173_HUMAN	Uncharacterized protein C1orf173 OS=Homo sapiens GN=C1orf173 PE=2 SV=1	4e-32	1	52.2523	4e-32	111
comp254737_c2_seq2	len=649	3.00609	0.692274	0.00270811	0.509484	sp|A4QNW7|PHIPL_DANRE	Phytanoyl-CoA hydroxylase-interacting protein-like OS=Danio rerio GN=phyhipl PE=2 SV=1	4e-17	1	33.8235	4e-17	136
comp217994_c0_seq1	len=539	1.42313	1.04789	0.00283096	0.521474	sp|Q5RH71|TSN33_DANRE	Tetraspanin-33 OS=Danio rerio GN=tspan33 PE=2 SV=1	3e-21	1	38.5417	3e-21	96
comp249852_c1_seq5	len=949	3.36901	1.11653	0.00287751	0.523545	sp|Q5IGR6|EXT1C_DANRE	Exostosin-1c OS=Danio rerio GN=ext1c PE=2 SV=1	1e-21	1	35.2601	1e-21	173
comp256366_c0_seq1	len=1880	-2.13932	1.45254	0.00299144	0.535858	sp|Q23985|DTX_DROME	Protein deltex OS=Drosophila melanogaster GN=dx PE=1 SV=2	5e-11	1	35.7724	5e-11	123
comp232232_c0_seq1	len=497	2.08392	1.35098	0.00316591	0.558263	sp|A1YF12|ZNF16_GORGO	Zinc finger protein 16 OS=Gorilla gorilla gorilla GN=ZNF16 PE=3 SV=1	2e-28	1	55.1724	2e-28	87
comp261363_c0_seq4	len=2687	2.86867	2.03877	0.00319953	0.558263	sp|Q96J94|PIWL1_HUMAN	Piwi-like protein 1 OS=Homo sapiens GN=PIWIL1 PE=1 SV=1	0	1	46.0023	0	863
comp231300_c0_seq2	len=726	-1.51115	1.24543	0.00329163	0.568948	sp|Q6PEH9|S39AA_DANRE	Zinc transporter ZIP10 OS=Danio rerio GN=slc39a10 PE=2 SV=1	2e-44	1	49.6855	2e-44	159
comp395846_c0_seq1	len=247	1.49604	0.30072	0.00331414	0.571054	sp|Q6VVW9|CP2R1_MOUSE	Vitamin D 25-hydroxylase OS=Mus musculus GN=Cyp2r1 PE=2 SV=1	3e-21	1	50.6329	3e-21	79
comp247813_c0_seq1	len=276	2.26218	0.88924	0.0033893	0.578598	sp|Q8NBH2|KY_HUMAN	Kyphoscoliosis peptidase OS=Homo sapiens GN=KY PE=1 SV=2	3e-06	1	36	3e-06	75
comp261113_c1_seq3	len=719	1.56176	0.636614	0.00342336	0.582613	sp|Q96IR2|ZN845_HUMAN	Zinc finger protein 845 OS=Homo sapiens GN=ZNF845 PE=2 SV=3	7e-38	1	32.4138	7e-38	290
comp203066_c0_seq1	len=348	1.97836	1.18961	0.00348445	0.591191	sp|Q96JS3|PGBD1_HUMAN	PiggyBac transposable element-derived protein 1 OS=Homo sapiens GN=PGBD1 PE=1 SV=1	9e-21	1	40.678	9e-21	118
comp254188_c1_seq9	len=1521	-1.82388	2.16609	0.00373164	0.616252	sp|Q6DFV8|VWDE_MOUSE	von Willebrand factor D and EGF domain-containing protein OS=Mus musculus GN=Vwde PE=2 SV=2	2e-10	1	25	2e-10	232
comp242750_c0_seq1	len=736	-1.28663	1.75514	0.00386741	0.629148	sp|Q3URE1|ACSF3_MOUSE	Acyl-CoA synthetase family member 3		NA			NA
comp262202_c0_seq16	len=332	-1.48651	0.826092	0.00394251	0.633069	sp|O70247|SC5A6_RAT	Sodium-dependent multivitamin transporter OS=Rattus norvegicus GN=Slc5a6 PE=2 SV=1	5e-08	1	46.4286	5e-08	56
comp247393_c0_seq1	len=1173	1.43805	2.82498	0.00394679	0.633069	sp|P31326|OTC_LITCT	Ornithine carbamoyltransferase		NA			NA
comp257331_c0_seq15	len=254	1.91645	1.46904	0.00396019	0.633069	sp|P14448|FIBA_CHICK	Fibrinogen alpha chain OS=Gallus gallus GN=FGA PE=1 SV=4	3e-11	1	53.3333	3e-11	45
comp236204_c0_seq1	len=371	2.24044	2.56147	0.003997	0.634869	sp|Q3LX99|TXLR3_EISFO	Lysenin-related protein 3 OS=Eisenia foetida PE=2 SV=1	1e-31	1	49.5935	1e-31	123
comp223303_c0_seq1	len=814	2.0083	2.28085	0.00405918	0.636026	sp|Q7PPU9|BND7A_ANOGA	Band 7 protein AGAP004871 OS=Anopheles gambiae GN=AGAP004871 PE=3 SV=3	5e-39	1	64.9573	5e-39	117
comp262188_c0_seq23	len=619	-1.29056	1.86788	0.00421358	0.652767	sp|P13406|FYN_XENLA	Tyrosine-protein kinase Fyn OS=Xenopus laevis GN=fyn PE=2 SV=3	1e-49	1	53.2051	1e-49	156
comp254803_c0_seq3	len=1277	1.60144	0.781704	0.00422503	0.652767	sp|Q91X85|FLVC2_MOUSE	Feline leukemia virus subgroup C receptor-related protein 2 OS=Mus musculus GN=Flvcr2 PE=1 SV=2	3e-86	1	45.0311	3e-86	322
comp255618_c0_seq1	len=1267	-1.807	2.04946	0.00447729	0.676622	sp|Q8AWF2|NACA_ORENI	Nascent polypeptide-associated complex subunit alpha OS=Oreochromis niloticus GN=naca PE=2 SV=1	1e-75	1	63.4615	1e-75	208
comp261879_c0_seq2	len=442	1.82468	0.386645	0.00459925	0.691885	sp|Q6PAW2|UBP16_XENLA	Ubiquitin carboxyl-terminal hydrolase 16 OS=Xenopus laevis GN=usp16 PE=2 SV=1	3e-23	1	41.2587	3e-23	143
comp260855_c3_seq2	len=3294	-2.13708	-0.121273	0.00467975	0.691948	sp|Q17N71|CLU_AEDAE	Clustered mitochondria protein homolog OS=Aedes aegypti GN=AAEL000794 PE=3 SV=1	0	1	50.8333	0	720
comp262228_c0_seq1	len=1669	-1.3824	4.33742	0.0046913	0.691948	sp|P13406|FYN_XENLA	Tyrosine-protein kinase Fyn OS=Xenopus laevis GN=fyn PE=2 SV=3	2e-65	1	41.1043	2e-65	326
comp253095_c1_seq1	len=409	1.72463	1.54875	0.00479856	0.699749	sp|Q1EHB4|SC5AC_HUMAN	Sodium-coupled monocarboxylate transporter 2 OS=Homo sapiens GN=SLC5A12 PE=2 SV=2	4e-15	1	32.3308	4e-15	133
comp260621_c1_seq1	len=2092	1.53945	3.73164	0.00486616	0.700767	sp|P35316|ATC_ARTSF	Calcium-transporting ATPase sarcoplasmic/endoplasmic reticulum type OS=Artemia franciscana PE=2 SV=1	6e-98	1	70.4348	6e-98	230
comp256366_c0_seq2	len=1892	2.30689	1.48047	0.00503834	0.715566	sp|Q23985|DTX_DROME	Protein deltex OS=Drosophila melanogaster GN=dx PE=1 SV=2	5e-11	1	35.7724	5e-11	123
comp253857_c0_seq4	len=947	1.51515	1.69876	0.00511717	0.722372	sp|Q920L7|ELOV5_RAT	Elongation of very long chain fatty acids protein 5 OS=Rattus norvegicus GN=Elovl5 PE=2 SV=1	3e-64	1	44.3439	3e-64	221
comp245592_c0_seq1	len=1055	1.61554	2.71858	0.00524825	0.734901	sp|B2RZ50|CDKN3_RAT	Cyclin-dependent kinase inhibitor 3 OS=Rattus norvegicus GN=Cdkn3 PE=2 SV=1	5e-39	1	37.6963	5e-39	191
comp197886_c0_seq1	len=290	1.63717	0.565394	0.00528636	0.735751	sp|P52738|ZN140_HUMAN	Zinc finger protein 140 OS=Homo sapiens GN=ZNF140 PE=2 SV=2	1e-09	1	53.0612	1e-09	49
comp258715_c4_seq26	len=1212	-1.38315	1.72098	0.00534541	0.735751	sp|Q5EB30|ODF3A_XENTR	Outer dense fiber protein 3 OS=Xenopus tropicalis GN=odf3 PE=2 SV=1	1e-81	1	49.7942	1e-81	243
comp252504_c0_seq2	len=2295	-1.44281	1.79889	0.00536094	0.735751	sp|Q40082|XYLA_HORVU	Xylose isomerase OS=Hordeum vulgare GN=XYLA PE=1 SV=1	1e-174	1	57.3394	1e-174	436
comp261628_c1_seq3	len=2663	1.89881	0.296936	0.00537404	0.735751	sp|Q54BM3|MCFG_DICDI	Mitochondrial substrate carrier family protein G OS=Dictyostelium discoideum GN=mcfG PE=2 SV=1	3e-70	1	40.9836	3e-70	305
comp268683_c0_seq1	len=2594	1.84022	4.7068	0.00564571	0.762778	sp|D3YYI7|RN217_MOUSE	Probable E3 ubiquitin-protein ligase RNF217 OS=Mus musculus GN=Rnf217 PE=3 SV=2	1e-10	1	24.2718	1e-10	206
comp256237_c0_seq2	len=2818	2.29385	1.85467	0.00565419	0.762778	sp|Q3SYV4|CAP1_BOVIN	Adenylyl cyclase-associated protein 1 OS=Bos taurus GN=CAP1 PE=2 SV=3	1e-38	1	44.2953	1e-38	149
comp260090_c0_seq1	len=3299	2.56155	1.56799	0.00587968	0.778017	sp|P69098|CALM_TRYBG	Calmodulin OS=Trypanosoma brucei gambiense PE=3 SV=2	5e-41	1	51.0204	5e-41	147
comp258208_c0_seq3	len=1951	1.7783	0.541493	0.00604813	0.788608	sp|Q5RE11|TSN3_PONAB	Tetraspanin-3 OS=Pongo abelii GN=TSPAN3 PE=2 SV=1	3e-16	1	26.1538	3e-16	195
comp253071_c0_seq2	len=573	2.17189	-0.0309781	0.00611825	0.788608	sp|Q69566|U88_HHV6U	Uncharacterized protein U88 OS=Human herpesvirus 6A (strain Uganda-1102) GN=U88 PE=4 SV=1	3e-07	1	59.1837	3e-07	49
comp246103_c3_seq1	len=484	-1.44187	1.41587	0.00620805	0.7897	sp|Q3MHH5|CCND3_BOVIN	G1/S-specific cyclin-D3 OS=Bos taurus GN=CCND3 PE=2 SV=1	4e-44	1	45.625	4e-44	160
comp260799_c5_seq1	len=1101	2.32388	2.26954	0.00633204	0.800104	sp|Q69566|U88_HHV6U	Uncharacterized protein U88 OS=Human herpesvirus 6A (strain Uganda-1102) GN=U88 PE=4 SV=1	8e-12	1	41.25	8e-12	80
comp238236_c0_seq1	len=668	-1.46912	1.03923	0.00637931	0.800104	sp|Q9P792|YN8B_SCHPO	ZZ-type zinc finger-containing protein P35G2,11c OS=Schizosaccharomyces pombe (strain 972 / ATCC 24843) GN=SPBP35G2,11c PE=4 SV=1	1e-12	1	31.3043	1e-12	115
comp253941_c0_seq1	len=733	-1.85325	0.576884	0.00655579	0.804007	sp|P39428|TRAF1_MOUSE	TNF receptor-associated factor 1 OS=Mus musculus GN=Traf1 PE=1 SV=2	4e-38	1	61.165	4e-38	103
comp207422_c0_seq1	len=768	-3.27961	2.47005	0.00693086	0.836844	sp|P23731|IFEB_ASCSU	Intermediate filament protein B OS=Ascaris suum PE=1 SV=1	3e-13	1	39.0625	3e-13	128
comp260956_c0_seq2	len=1936	2.20194	1.92127	0.00720398	0.860603	sp|O43734|CIKS_HUMAN	Adapter protein CIKS OS=Homo sapiens GN=TRAF3IP2 PE=1 SV=3	5e-18	1	33.1126	5e-18	151
comp249807_c2_seq1	len=490	-1.35974	1.00488	0.0073574	0.873273	sp|Q24732|GLAS_DROVI	Protein glass OS=Drosophila virilis GN=gl PE=3 SV=1	1e-14	1	35.2381	1e-14	105
comp246830_c2_seq2	len=327	-1.55519	1.25883	0.00747805	0.878171	sp|P34457|YMD3_CAEEL	Putative uncharacterized transposon-derived protein F54H12,3 OS=Caenorhabditis elegans GN=F54H12,3 PE=5 SV=1	2e-13	1	37.7551	2e-13	98
comp222450_c0_seq1	len=747	-1.38296	1.86167	0.00753409	0.882877	sp|Q64542|AT2B4_RAT	Plasma membrane calcium-transporting ATPase 4 OS=Rattus norvegicus GN=Atp2b4 PE=2 SV=1	1e-117	1	71.8876	1e-117	249
comp262228_c1_seq1	len=1036	-1.56986	3.35215	0.00785845	0.898973	sp|P42689|SRK3_SPOLA	Tyrosine-protein kinase SRK3 (Fragment) OS=Spongilla lacustris GN=SRK3 PE=2 SV=1	8e-32	1	49.5935	8e-32	123
comp260072_c4_seq3	len=303	1.6387	0.196549	0.00787239	0.898973	sp|A1Z1Q3|MACD2_HUMAN	O-acetyl-ADP-ribose deacetylase MACROD2 OS=Homo sapiens GN=MACROD2 PE=1 SV=1	3e-20	1	43.3962	3e-20	106
comp262188_c0_seq15	len=468	2.81665	1.41292	0.00787837	0.898973	sp|Q9NX46|ARHL2_HUMAN	Poly(ADP-ribose) glycohydrolase ARH3 OS=Homo sapiens GN=ADPRHL2 PE=1 SV=1	6e-22	1	52.439	6e-22	82
comp245639_c0_seq7	len=2765	1.42709	4.5304	0.00841268	0.932937	sp|Q8TDB6|DTX3L_HUMAN	E3 ubiquitin-protein ligase DTX3L OS=Homo sapiens GN=DTX3L PE=1 SV=1	2e-53	1	55.4945	2e-53	182
comp259350_c0_seq2	len=2688	-1.76923	0.815603	0.00855729	0.940199	sp|Q10138|YAS2_SCHPO	CRAL-TRIO domain-containing protein C3H8,02 OS=Schizosaccharomyces pombe (strain 972 / ATCC 24843) GN=SPAC3H8,02 PE=1 SV=1	5e-11	1	29.7297	5e-11	185
comp262560_c0_seq14	len=539	-1.1783	3.67866	0.00858053	0.940199	sp|A2ARV4|LRP2_MOUSE	Low-density lipoprotein receptor-related protein 2 OS=Mus musculus GN=Lrp2 PE=1 SV=1	9e-12	1	32.3529	9e-12	102
comp253770_c0_seq1	len=2078	-1.24927	1.08647	0.00858863	0.940199	sp|Q8N806|UBR7_HUMAN	Putative E3 ubiquitin-protein ligase UBR7 OS=Homo sapiens GN=UBR7 PE=1 SV=2	3e-75	1	59.1837	3e-75	196
comp144913_c0_seq1	len=237	-1.542	2.26926	0.00861629	0.940199	sp|P22771|GLRA2_RAT	Glycine receptor subunit alpha-2 OS=Rattus norvegicus GN=Glra2 PE=1 SV=1	3e-08	1	36.7089	3e-08	79
comp262560_c0_seq15	len=1279	-1.31642	0.638137	0.0086352	0.940199	sp|A2ARV4|LRP2_MOUSE	Low-density lipoprotein receptor-related protein 2 OS=Mus musculus GN=Lrp2 PE=1 SV=1	1e-66	1	35.5795	1e-66	371
comp262514_c0_seq4	len=4427	-2.80538	1.57376	0.00868048	0.941461	sp|P35580|MYH10_HUMAN	Myosin-10 OS=Homo sapiens GN=MYH10 PE=1 SV=3	0	1	57.8001	0	1391
comp256494_c1_seq1	len=1679	2.11086	4.47459	0.00871116	0.941461	sp|O93308|SMC1A_XENLA	Structural maintenance of chromosomes protein 1A OS=Xenopus laevis GN=smc1a PE=1 SV=1	2e-71	1	35.3659	2e-71	410
comp258205_c0_seq8	len=547	1.3335	1.09542	0.00876353	0.944335	sp|Q9Y2F9|BTBD3_HUMAN	BTB/POZ domain-containing protein 3 OS=Homo sapiens GN=BTBD3 PE=2 SV=1	7e-26	1	31.8182	7e-26	176
comp225233_c0_seq1	len=268	1.32241	1.82125	0.00878592	0.944335	sp|Q5XM24|APRA_DICDI	Autocrine proliferation repressor protein A OS=Dictyostelium discoideum GN=aprA PE=1 SV=1	1e-06	1	31.0345	1e-06	87
comp260762_c0_seq1	len=4975	-1.64189	2.41682	0.00900725	0.957436	sp|O16025|AOSL_PLEHO	Allene oxide synthase-lipoxygenase protein OS=Plexaura homomalla PE=1 SV=1	1e-111	1	26.7364	1e-111	1051
comp242014_c1_seq1	len=294	-1.37071	1.0781	0.00942932	0.980348	sp|O94985|CSTN1_HUMAN	Calsyntenin-1 OS=Homo sapiens GN=CLSTN1 PE=1 SV=1	1e-16	1	42.268	1e-16	97
comp262188_c1_seq1	len=1028	-1.69407	2.77942	0.00980918	0.99149	sp|P00524|SRC_RSVSA	Tyrosine-protein kinase transforming protein Src OS=Avian leukosis virus RSA GN=V-SRC PE=1 SV=5	2e-35	1	33.3333	2e-35	285
comp261536_c0_seq3	len=1892	1.31406	1.91726	0.00982063	0.99149	sp|Q5BL81|SC5A8_XENTR	Sodium-coupled monocarboxylate transporter 1 OS=Xenopus tropicalis GN=slc5a8 PE=2 SV=1	7e-37	1	27.2936	7e-37	436
comp260312_c3_seq5	len=1400	-1.49373	5.34034	0.0100115	0.99149	sp|P16230|SRCH_RABIT	Sarcoplasmic reticulum histidine-rich calcium-binding protein OS=Oryctolagus cuniculus GN=HRC PE=1 SV=1	6e-06	1	20.9738	6e-06	267
comp251188_c0_seq1	len=898	1.67266	2.39656	0.0100254	0.99149	sp|Q9V4M2|WECH_DROME	Protein wech OS=Drosophila melanogaster GN=wech PE=1 SV=2	2e-07	1	26.9737	2e-07	152
comp263223_c0_seq1	len=240	1.58295	4.1869	0.0100954	0.991807	sp|Q5RC26|FBLN5_PONAB	Fibulin-5 OS=Pongo abelii GN=FBLN5 PE=2 SV=1	3e-17	1	44.8718	3e-17	78
comp253461_c0_seq2	len=2409	-1.47018	1.07264	0.0103114	1	sp|Q9VVY3|GBS76_DROME	Glycogen-binding subunit 76A OS=Drosophila melanogaster GN=Gbs-76A PE=1 SV=1	1e-23	1	33.61	1e-23	241
comp261563_c0_seq21	len=218	1.65613	0.56393	0.0103506	1	sp|Q9FGY1|BXL1_ARATH	Beta-D-xylosidase 1 OS=Arabidopsis thaliana GN=BXL1 PE=1 SV=1	2e-10	1	47.4576	2e-10	59
comp233145_c0_seq2	len=2113	-1.52049	0.331279	0.0103635	1	sp|Q8BH43|WASF2_MOUSE	Wiskott-Aldrich syndrome protein family member 2 OS=Mus musculus GN=Wasf2 PE=1 SV=1	8e-24	1	36.1446	8e-24	166
comp217438_c0_seq1	len=229	1.40738	1.47705	0.010429	1	sp|Q9UVB8|RL44_WICCF	60S ribosomal protein L44 OS=Wickerhamomyces ciferrii (strain F-60-10 / ATCC 14091 / CBS 111 / JCM 3599 / NBRC 0793 / NRRL Y-1031) GN=RPL44 PE=3 SV=3	1e-33	1	77.2727	1e-33	66
comp246240_c0_seq1	len=499	1.53418	1.92716	0.0104385	1	sp|P04572|SCP_PERVT	Sarcoplasmic calcium-binding protein OS=Perinereis vancaurica tetradentata PE=1 SV=1	9e-15	1	28.4848	9e-15	165
comp259829_c2_seq1	len=267	1.35901	0.745249	0.010634	1	sp|Q9U3S9|NAS6_CAEEL	Zinc metalloproteinase nas-6 OS=Caenorhabditis elegans GN=nas-6 PE=2 SV=2	6e-08	1	45.5882	6e-08	68
comp259672_c0_seq1	len=3110	1.58825	0.157802	0.0107529	1	sp|Q8BGD7|NPAS4_MOUSE	Neuronal PAS domain-containing protein 4 OS=Mus musculus GN=Npas4 PE=1 SV=1	9e-48	1	36.9048	9e-48	336
comp233440_c0_seq1	len=620	1.36418	0.620193	0.0110474	1	sp|P16222|GLBL_LAMSP	Giant hemoglobin linker AV-1 chain OS=Lamellibrachia sp, PE=1 SV=1	2e-17	1	28.8591	2e-17	149
comp256033_c1_seq1	len=779	-2.24271	2.25245	0.0114069	1	sp|B2GV87|PTPRE_RAT	Receptor-type tyrosine-protein phosphatase epsilon OS=Rattus norvegicus GN=Ptpre PE=2 SV=1	7e-06	1	41.2698	7e-06	63
comp229696_c2_seq1	len=801	1.4454	1.04649	0.0115469	1	sp|Q8C525|M21D2_MOUSE	Protein MB21D2 OS=Mus musculus GN=Mb21d2 PE=1 SV=1	2e-09	1	25.2577	2e-09	194
comp261861_c2_seq6	len=3112	-1.70757	1.44172	0.0116633	1	sp|Q3TZZ7|ESYT2_MOUSE	Extended synaptotagmin-2 OS=Mus musculus GN=Esyt2 PE=1 SV=1	1e-124	1	31.8584	1e-124	791
comp258408_c2_seq1	len=281	1.25364	0.37059	0.0116911	1	sp|Q95SX7|RTBS_DROME	Probable RNA-directed DNA polymerase from transposon BS OS=Drosophila melanogaster GN=RTase PE=2 SV=1	6e-10	1	41.0256	6e-10	78
comp240852_c2_seq1	len=580	-1.2265	0.857201	0.0117153	1	sp|Q8WU39|MZB1_HUMAN	Marginal zone B- and B1-cell-specific protein OS=Homo sapiens GN=MZB1 PE=1 SV=1	3e-07	1	37.8049	3e-07	82
comp237403_c0_seq1	len=829	-1.21725	1.45029	0.0117419	1	sp|Q5SVZ6|ZMYM1_HUMAN	Zinc finger MYM-type protein 1 OS=Homo sapiens GN=ZMYM1 PE=2 SV=1	3e-10	1	29.1925	3e-10	161
comp240033_c0_seq1	len=574	1.36776	3.35942	0.0119152	1	sp|P19218|GP2_RAT	Pancreatic secretory granule membrane major glycoprotein GP2 OS=Rattus norvegicus GN=Gp2 PE=1 SV=1	1e-17	1	37.1212	1e-17	132
comp252780_c2_seq1	len=626	1.33658	2.59396	0.0125571	1	sp|P20107|ZRC1_YEAST	Zinc/cadmium resistance protein OS=Saccharomyces cerevisiae (strain ATCC 204508 / S288c) GN=ZRC1 PE=1 SV=2	6e-32	1	55.3571	6e-32	112
comp222753_c0_seq1	len=554	1.57123	1.67657	0.0125998	1	sp|B6MFW3|HOOK_BRAFL	Protein Hook homolog OS=Branchiostoma floridae GN=BRAFLDRAFT_281537 PE=3 SV=1	1e-13	1	28.2828	1e-13	198
comp262520_c1_seq5	len=6283	-1.29584	0.90623	0.0131243	1	sp|O42414|NFASC_CHICK	Neurofascin OS=Gallus gallus GN=NFASC PE=1 SV=1	5e-38	1	25.9124	5e-38	548
comp241790_c0_seq1	len=681	2.48976	0.414817	0.0133047	1	sp|O42387|RS24_TAKRU	40S ribosomal protein S24 OS=Takifugu rubripes GN=rps24 PE=3 SV=1	3e-50	1	81.7204	3e-50	93
comp256967_c1_seq1	len=859	-1.61558	2.85473	0.0135213	1	sp|O35701|MATN3_MOUSE	Matrilin-3 OS=Mus musculus GN=Matn3 PE=1 SV=2	4e-18	1	31.8182	4e-18	198
comp234349_c0_seq3	len=405	1.68914	1.26522	0.0140541	1	sp|F6Z5C0|UBP15_XENTR	Ubiquitin carboxyl-terminal hydrolase 15 OS=Xenopus tropicalis GN=usp15 PE=2 SV=2	3e-12	1	56.4103	3e-12	39
comp230506_c0_seq1	len=1364	2.39498	0.949158	0.0140692	1	sp|Q8HXW6|PPT1_MACFA	Palmitoyl-protein thioesterase 1 OS=Macaca fascicularis GN=PPT1 PE=2 SV=1	1e-125	1	63.2353	1e-125	272
comp261555_c1_seq5	len=1150	1.5289	3.96137	0.014558	1	sp|Q9NQE7|TSSP_HUMAN	Thymus-specific serine protease OS=Homo sapiens GN=PRSS16 PE=2 SV=2	2e-58	1	37.1622	2e-58	296
comp255994_c0_seq2	len=795	-1.28727	1.62951	0.0146211	1	sp|Q9NFP5|SH3BG_DROME	SH3 domain-binding glutamic acid-rich protein homolog OS=Drosophila melanogaster GN=Sh3beta PE=1 SV=2	3e-17	1	39.3162	3e-17	117
comp256033_c1_seq5	len=3703	2.45529	4.08146	0.014976	1	sp|O14522|PTPRT_HUMAN	Receptor-type tyrosine-protein phosphatase T OS=Homo sapiens GN=PTPRT PE=1 SV=6	2e-86	1	33.1081	2e-86	592
comp232812_c0_seq1	len=1258	1.25968	1.13175	0.0150412	1	sp|Q9DB05|SNAA_MOUSE	Alpha-soluble NSF attachment protein OS=Mus musculus GN=Napa PE=1 SV=1	8e-82	1	44.6367	8e-82	289
comp237082_c0_seq1	len=310	1.23991	0.887066	0.0153089	1	sp|P42346|MTOR_RAT	Serine/threonine-protein kinase mTOR OS=Rattus norvegicus GN=Mtor PE=1 SV=1	1e-27	1	63.8554	1e-27	83
comp241175_c0_seq1	len=664	1.90534	3.89202	0.015692	1	sp|Q99NI3|GT2D2_MOUSE	General transcription factor II-I repeat domain-containing protein 2 OS=Mus musculus GN=Gtf2ird2 PE=2 SV=1	5e-08	1	37.3333	5e-08	75
comp256388_c0_seq1	len=1500	1.36356	3.53328	0.0159174	1	sp|Q2VQV9|CECR1_XENLA	Adenosine deaminase CECR1 OS=Xenopus laevis GN=cecr1 PE=1 SV=1	2e-40	1	33.0218	2e-40	321
comp251802_c0_seq1	len=1542	2.45512	3.61886	0.0163545	1	sp|Q9H4G4|GAPR1_HUMAN	Golgi-associated plant pathogenesis-related protein 1 OS=Homo sapiens GN=GLIPR2 PE=1 SV=3	1e-27	1	39.8734	1e-27	158
comp217100_c1_seq1	len=346	1.21133	1.63202	0.0164141	1	sp|Q9QXT0|CNPY2_MOUSE	Protein canopy homolog 2 OS=Mus musculus GN=Cnpy2 PE=2 SV=1	2e-07	1	42.3729	2e-07	59
comp262560_c0_seq11	len=2848	-1.08167	4.9275	0.0165968	1	sp|P98164|LRP2_HUMAN	Low-density lipoprotein receptor-related protein 2 OS=Homo sapiens GN=LRP2 PE=1 SV=3	0	1	38.3442	0	918
comp243591_c4_seq1	len=946	-1.33133	1.85724	0.016752	1	sp|Q78IQ7|S39A4_MOUSE	Zinc transporter ZIP4 OS=Mus musculus GN=Slc39a4 PE=1 SV=1	7e-17	1	37.5	7e-17	136
comp256486_c0_seq4	len=2043	-1.72979	0.367875	0.0168477	1	sp|Q58DW2|CGL_BOVIN	Cystathionine gamma-lyase OS=Bos taurus GN=CTH PE=2 SV=1	1e-167	1	60.101	1e-167	396
comp231703_c0_seq1	len=618	-1.90809	1.7346	0.0169274	1	sp|P45883|ACBP_PELRI	Acyl-CoA-binding protein homolog OS=Pelophylax ridibundus PE=1 SV=2	3e-34	1	67.4699	3e-34	83
comp253195_c1_seq2	len=2490	-1.93623	-0.309239	0.0172944	1	sp|Q9R1K5|FZR_MOUSE	Fizzy-related protein homolog OS=Mus musculus GN=Fzr1 PE=1 SV=1	0	1	69.1383	0	499
comp241253_c1_seq2	len=467	-1.15716	0.00849839	0.0173967	1	sp|Q17241|SGF1_BOMMO	Silk gland factor 1 OS=Bombyx mori GN=SGF1 PE=2 SV=1	4e-55	1	67.4797	4e-55	123
comp260129_c0_seq2	len=1611	-2.00526	2.24369	0.0175645	1	sp|P10079|FBP1_STRPU	Fibropellin-1 OS=Strongylocentrotus purpuratus GN=EGF1 PE=1 SV=2	7e-11	1	22.9167	7e-11	336
comp250594_c0_seq5	len=1129	2.00711	2.83287	0.0176826	1	sp|P04572|SCP_PERVT	Sarcoplasmic calcium-binding protein OS=Perinereis vancaurica tetradentata PE=1 SV=1	5e-16	1	26.5537	5e-16	177
comp260912_c1_seq1	len=1399	1.20907	7.92734	0.0177459	1	sp|P29190|PCKG_HAECO	Phosphoenolpyruvate carboxykinase [GTP] OS=Haemonchus contortus GN=PEPCK PE=2 SV=1	1e-112	1	60	1e-112	275
comp257232_c0_seq1	len=2066	1.15235	3.11129	0.0177601	1	sp|O43242|PSMD3_HUMAN	26S proteasome non-ATPase regulatory subunit 3 OS=Homo sapiens GN=PSMD3 PE=1 SV=2	1e-180	1	57.1138	1e-180	492
comp169861_c0_seq1	len=363	-1.88007	2.1743	0.0180253	1	sp|P10658|SERC_RABIT	Phosphoserine aminotransferase OS=Oryctolagus cuniculus GN=PSAT1 PE=2 SV=1	6e-52	1	63.3333	6e-52	120
comp236927_c0_seq1	len=311	-1.19478	0.176287	0.0182625	1	sp|O14772|FPGT_HUMAN	Fucose-1-phosphate guanylyltransferase OS=Homo sapiens GN=FPGT PE=1 SV=2	9e-28	1	52.4752	9e-28	101
comp208307_c1_seq1	len=507	1.30072	2.31221	0.0187574	1	sp|O02751|CFDP2_BOVIN	Craniofacial development protein 2 OS=Bos taurus GN=CFDP2 PE=1 SV=2	1e-25	1	38.4146	1e-25	164
comp258463_c0_seq2	len=3263	1.55031	1.02998	0.0188354	1	sp|Q66HH4|HERP2_RAT	Homocysteine-responsive endoplasmic reticulum-resident ubiquitin-like domain member 2 protein OS=Rattus norvegicus GN=Herpud2 PE=2 SV=1	3e-38	1	29.1855	3e-38	442
comp260752_c1_seq1	len=672	-1.32245	2.72702	0.0191433	1	sp|P34456|YMD2_CAEEL	Uncharacterized protein F54H12,2 OS=Caenorhabditis elegans GN=F54H12,2 PE=4 SV=1	2e-16	1	26.5487	2e-16	226
comp237129_c3_seq1	len=220	-1.17157	0.0775638	0.0192327	1	sp|Q7T384|SC5AC_DANRE	Sodium-coupled monocarboxylate transporter 2 OS=Danio rerio GN=slc5a12 PE=1 SV=1	6e-08	1	35.7143	6e-08	70
comp248873_c0_seq1	len=2171	1.34404	5.45021	0.0194552	1	sp|Q96CS3|FAF2_HUMAN	FAS-associated factor 2 OS=Homo sapiens GN=FAF2 PE=1 SV=2	1e-123	1	42.3077	1e-123	442
comp262498_c0_seq16	len=572	1.29264	1.00854	0.0195687	1	sp|Q7LHG5|YI31B_YEAST	Transposon Ty3-I Gag-Pol polyprotein OS=Saccharomyces cerevisiae (strain ATCC 204508 / S288c) GN=TY3B-I PE=3 SV=2	2e-21	1	40.9091	2e-21	110
comp194637_c0_seq1	len=467	1.80309	0.222017	0.019686	1	sp|Q95SX7|RTBS_DROME	Probable RNA-directed DNA polymerase from transposon BS OS=Drosophila melanogaster GN=RTase PE=2 SV=1	5e-06	1	29.8387	5e-06	124
comp238921_c0_seq1	len=243	-1.25134	0.183943	0.0198253	1	sp|Q7Z2Y8|GVIN1_HUMAN	Interferon-induced very large GTPase 1 OS=Homo sapiens GN=GVINP1 PE=2 SV=2	2e-10	1	38.3562	2e-10	73
comp256522_c0_seq2	len=723	-1.40393	1.39941	0.0198281	1	sp|P00591|LIPP_PIG	Pancreatic triacylglycerol lipase OS=Sus scrofa GN=PNLIP PE=1 SV=2	2e-15	1	32.0513	2e-15	156
comp240837_c1_seq2	len=626	-1.0494	1.59601	0.0201442	1	sp|Q4R9F7|REXON_MACFA	Putative RNA exonuclease NEF-sp OS=Macaca fascicularis GN=QtsA-10054 PE=2 SV=1	7e-20	1	42.2764	7e-20	123
comp274790_c0_seq1	len=1055	-1.49341	3.86857	0.0203909	1	sp|Q8IIG7|YPF05_PLAF7	Uncharacterized protein PF11_0207 OS=Plasmodium falciparum (isolate 3D7) GN=PF11_0207 PE=4 SV=2	3e-07	1	21.1957	3e-07	184
comp253718_c1_seq13	len=428	-1.12897	3.32194	0.0205665	1	sp|O60494|CUBN_HUMAN	Cubilin OS=Homo sapiens GN=CUBN PE=1 SV=5	2e-12	1	29.4118	2e-12	136
comp240975_c1_seq1	len=328	-1.05613	1.19813	0.0206314	1	sp|P08045|XFIN_XENLA	Zinc finger protein Xfin OS=Xenopus laevis PE=1 SV=1	7e-11	1	33.6134	7e-11	119
comp246393_c0_seq1	len=847	-1.1851	1.64521	0.0206734	1	sp|Q96T55|KCNKG_HUMAN	Potassium channel subfamily K member 16 OS=Homo sapiens GN=KCNK16 PE=2 SV=1	2e-28	1	43.3824	2e-28	136
comp253941_c2_seq1	len=1292	-1.44603	2.07436	0.0208411	1	sp|P39429|TRAF2_MOUSE	TNF receptor-associated factor 2 OS=Mus musculus GN=Traf2 PE=1 SV=1	4e-61	1	32.8358	4e-61	402
comp259829_c0_seq1	len=214	1.1773	0.952971	0.0213346	1	sp|Q18206|NAS36_CAEEL	Zinc metalloproteinase nas-36 OS=Caenorhabditis elegans GN=nas-36 PE=1 SV=2	8e-11	1	43.0556	8e-11	72
comp204851_c0_seq1	len=512	-1.2913	1.23953	0.0214593	1	sp|Q11116|YX0A_CAEEL	Uncharacterized protein C03B1,10 OS=Caenorhabditis elegans GN=C03B1,10 PE=4 SV=1	1e-11	1	68.9655	1e-11	29
comp253511_c0_seq2	len=1817	-1.56833	1.11924	0.0216128	1	sp|Q60972|RBBP4_MOUSE	Histone-binding protein RBBP4 OS=Mus musculus GN=Rbbp4 PE=1 SV=5	0	1	89.0244	0	410
comp254536_c0_seq1	len=1511	1.55762	2.79259	0.0216438	1	sp|Q04310|Y4629_STRCO	Uncharacterized protein SCO4629 OS=Streptomyces coelicolor (strain ATCC BAA-471 / A3(2) / M145) GN=SCO4629 PE=4 SV=2	4e-29	1	31.0811	4e-29	222
comp236888_c0_seq1	len=602	-1.58718	1.83026	0.0216825	1	sp|O15991|KLOM_EISFO	Lombricine kinase OS=Eisenia foetida PE=1 SV=1	3e-57	1	68.1159	3e-57	138
comp249091_c1_seq2	len=832	-1.24293	2.11392	0.0217844	1	sp|P59328|WDHD1_MOUSE	WD repeat and HMG-box DNA-binding protein 1 OS=Mus musculus GN=Wdhd1 PE=1 SV=2	1e-12	1	30	1e-12	180
comp258723_c0_seq1	len=3378	2.10783	0.840215	0.0218819	1	sp|Q9W596|FUTSC_DROME	Microtubule-associated protein futsch OS=Drosophila melanogaster GN=futsch PE=1 SV=4	3e-72	1	31.8702	3e-72	524
comp254845_c0_seq4	len=1922	1.17943	4.70037	0.0222028	1	sp|Q9Y646|CBPQ_HUMAN	Carboxypeptidase Q OS=Homo sapiens GN=CPQ PE=1 SV=1	1e-126	1	45.1247	1e-126	441
comp196911_c2_seq1	len=445	1.13651	0.208951	0.0222082	1	sp|Q9MYS6|KCNQ1_RABIT	Potassium voltage-gated channel subfamily KQT member 1 (Fragment) OS=Oryctolagus cuniculus GN=KCNQ1 PE=2 SV=2	3e-88	1	88.7324	3e-88	142
comp244252_c0_seq1	len=1701	1.14023	2.07122	0.0223159	1	sp|Q6AY22|SPAT1_RAT	Spermatogenesis-associated protein 1 OS=Rattus norvegicus GN=Spata1 PE=2 SV=1	6e-18	1	43.5185	6e-18	108
comp259829_c4_seq1	len=239	1.29039	0.733126	0.0224773	1	sp|Q18439|NAS8_CAEEL	Zinc metalloproteinase nas-8 OS=Caenorhabditis elegans GN=nas-8 PE=2 SV=3	3e-06	1	36.3636	3e-06	55
comp253718_c1_seq7	len=1103	-1.10739	2.62113	0.0225751	1	sp|O70244|CUBN_RAT	Cubilin OS=Rattus norvegicus GN=Cubn PE=1 SV=2	1e-18	1	29.7398	1e-18	269
comp212845_c0_seq1	len=349	-1.4465	0.921695	0.0228376	1	sp|Q0IIF9|CP2U1_BOVIN	Cytochrome P450 2U1 OS=Bos taurus GN=CYP2U1 PE=2 SV=1	4e-08	1	37.6812	4e-08	69
comp236564_c0_seq1	len=804	1.23966	1.35601	0.02287	1	sp|O15072|ATS3_HUMAN	A disintegrin and metalloproteinase with thrombospondin motifs 3 OS=Homo sapiens GN=ADAMTS3 PE=2 SV=4	5e-80	1	42.963	5e-80	270
comp702362_c0_seq1	len=280	-1.71306	0.245719	0.0229239	1	sp|Q7UWI5|SECA2_RHOBA	Protein translocase subunit SecA 2 OS=Rhodopirellula baltica (strain SH1) GN=secA2 PE=3 SV=2	2e-12	1	50	2e-12	66
comp241083_c0_seq1	len=711	1.09882	3.17216	0.0233411	1	sp|B3MFV7|LPHN_DROAN	Latrophilin Cirl OS=Drosophila ananassae GN=Cirl PE=3 SV=1	9e-13	1	38.7755	9e-13	98
comp262076_c0_seq20	len=1003	-1.09597	0.892996	0.0233922	1	sp|Q0IIV2|RHBG_XENTR	Ammonium transporter Rh type B OS=Xenopus tropicalis GN=rhbg PE=2 SV=1	1e-39	1	52.7778	1e-39	144
comp254746_c6_seq1	len=1211	-1.07759	2.47821	0.0235984	1	sp|O97831|LPHN1_BOVIN	Latrophilin-1 OS=Bos taurus GN=LPHN1 PE=2 SV=1	2e-33	1	26.2791	2e-33	430
comp132801_c0_seq1	len=396	1.63542	2.44142	0.0242296	1	sp|Q76KB1|HS2ST_CHICK	Heparan sulfate 2-O-sulfotransferase 1 OS=Gallus gallus GN=HS2ST1 PE=1 SV=1	1e-50	1	59.2308	1e-50	130
comp246830_c2_seq3	len=319	-1.21817	1.07081	0.0244673	1	sp|P34457|YMD3_CAEEL	Putative uncharacterized transposon-derived protein F54H12,3 OS=Caenorhabditis elegans GN=F54H12,3 PE=5 SV=1	2e-15	1	36.8932	2e-15	103
comp247086_c0_seq1	len=1223	1.70805	1.75709	0.0245232	1	sp|P07314|GGT1_RAT	Gamma-glutamyltranspeptidase 1 OS=Rattus norvegicus GN=Ggt1 PE=1 SV=4	6e-82	1	44.9231	6e-82	325
comp257880_c0_seq1	len=2488	-1.1734	4.582	0.0247241	1	sp|O08914|FAAH1_MOUSE	Fatty-acid amide hydrolase 1 OS=Mus musculus GN=Faah PE=2 SV=1	1e-112	1	41.6185	1e-112	519
comp253857_c0_seq3	len=622	1.13001	1.70099	0.0251862	1	sp|Q9JLJ4|ELOV2_MOUSE	Elongation of very long chain fatty acids protein 2 OS=Mus musculus GN=Elovl2 PE=2 SV=1	2e-14	1	43.0233	2e-14	86
comp234851_c0_seq1	len=486	1.49523	2.35061	0.0254216	1	sp|Q8N328|PGBD3_HUMAN	PiggyBac transposable element-derived protein 3 OS=Homo sapiens GN=PGBD3 PE=2 SV=3	2e-07	1	30.303	2e-07	99
comp255281_c1_seq1	len=942	1.15189	2.37236	0.0254668	1	sp|Q52N47|ITM2B_PIG	Integral membrane protein 2B OS=Sus scrofa GN=ITM2B PE=2 SV=1	2e-17	1	29.7872	2e-17	141
comp224236_c0_seq1	len=537	1.10769	0.567067	0.0255585	1	sp|P49815|TSC2_HUMAN	Tuberin OS=Homo sapiens GN=TSC2 PE=1 SV=2	6e-14	1	30.0813	6e-14	123
comp259178_c0_seq1	len=1582	1.06144	3.60735	0.0258852	1	sp|P04069|CBPB_ASTFL	Carboxypeptidase B OS=Astacus fluviatilis PE=1 SV=1	8e-65	1	34.8101	8e-65	316
comp246054_c0_seq1	len=913	1.28944	2.12789	0.0259629	1	sp|A2VDF0|FUCM_HUMAN	Fucose mutarotase OS=Homo sapiens GN=FUOM PE=1 SV=2	4e-61	1	63.6986	4e-61	146
comp236199_c0_seq1	len=239	-1.09685	0.466126	0.0261173	1	sp|Q9VT65|CANB_DROME	Calpain-B OS=Drosophila melanogaster GN=CalpB PE=1 SV=2	2e-20	1	56.338	2e-20	71
comp254148_c0_seq2	len=1733	2.49267	2.37227	0.0261299	1	sp|Q3SZW1|TSSK1_BOVIN	Testis-specific serine/threonine-protein kinase 1 OS=Bos taurus GN=TSSK1B PE=2 SV=1	4e-64	1	42.7586	4e-64	290
comp262458_c1_seq3	len=4012	1.42472	1.84363	0.0264806	1	sp|Q86YZ3|HORN_HUMAN	Hornerin OS=Homo sapiens GN=HRNR PE=1 SV=2	4e-11	1	28.3871	4e-11	310
comp217598_c0_seq1	len=976	-0.964067	3.48383	0.0266787	1	sp|Q6NZQ8|MARH1_MOUSE	E3 ubiquitin-protein ligase MARCH1 OS=Mus musculus GN=March1 PE=1 SV=2	1e-10	1	26.6667	1e-10	165
comp251007_c0_seq2	len=1427	2.11656	0.678304	0.0270286	1	sp|Q645M6|FADD_BOVIN	Protein FADD OS=Bos taurus GN=FADD PE=2 SV=1	4e-10	1	38.5542	4e-10	83
comp226832_c0_seq1	len=279	1.39491	1.39456	0.0270562	1	sp|P55006|RDH7_RAT	Retinol dehydrogenase 7 OS=Rattus norvegicus GN=Rdh7 PE=2 SV=1	6e-21	1	50.5495	6e-21	91
comp237464_c1_seq1	len=419	-1.20813	1.07988	0.0271181	1	sp|O89033|CDC6_MOUSE	Cell division control protein 6 homolog OS=Mus musculus GN=Cdc6 PE=2 SV=2	2e-17	1	39.604	2e-17	101
comp255942_c5_seq2	len=2799	1.21339	3.87311	0.0271767	1	sp|P08154|EGR1_RAT	Early growth response protein 1 OS=Rattus norvegicus GN=Egr1 PE=1 SV=2	7e-52	1	66.1765	7e-52	136
comp253241_c0_seq2	len=1810	1.49188	1.03638	0.027327	1	sp|Q9CXF0|KYNU_MOUSE	Kynureninase OS=Mus musculus GN=Kynu PE=2 SV=3	1e-154	1	50.2193	1e-154	456
comp258229_c2_seq2	len=1636	1.52407	2.72498	0.0280349	1	sp|P80192|M3K9_HUMAN	Mitogen-activated protein kinase kinase kinase 9 OS=Homo sapiens GN=MAP3K9 PE=1 SV=3	4e-42	1	37.6068	4e-42	234
comp259832_c3_seq5	len=2473	1.38305	3.75153	0.0281912	1	sp|A1KZ92|PXDNL_HUMAN	Peroxidasin-like protein OS=Homo sapiens GN=PXDNL PE=1 SV=3	3e-07	1	25.4438	3e-07	169
comp261491_c3_seq1	len=1545	1.33232	3.1354	0.0283276	1	sp|P51841|GUC2F_HUMAN	Retinal guanylyl cyclase 2 OS=Homo sapiens GN=GUCY2F PE=2 SV=2	2e-32	1	27.6712	2e-32	365
comp260944_c0_seq19	len=378	1.66972	1.43425	0.0283475	1	sp|P39429|TRAF2_MOUSE	TNF receptor-associated factor 2 OS=Mus musculus GN=Traf2 PE=1 SV=1	6e-43	1	57.1429	6e-43	112
comp259118_c0_seq1	len=1861	1.11243	3.23623	0.0283719	1	sp|Q9Y6H1|CHCH2_HUMAN	Coiled-coil-helix-coiled-coil-helix domain-containing protein 2		NA			NA
comp211425_c0_seq1	len=210	1.119	0.749464	0.0284238	1	sp|Q03720|SLO_DROME	Calcium-activated potassium channel slowpoke OS=Drosophila melanogaster GN=slo PE=1 SV=3	4e-14	1	47.6923	4e-14	65
comp256699_c0_seq1	len=2829	-1.52277	0.605729	0.0285717	1	sp|P00516|KGP1_BOVIN	cGMP-dependent protein kinase 1 OS=Bos taurus GN=PRKG1 PE=1 SV=2	0	1	57.8947	0	684
comp262159_c0_seq1	len=3492	1.63249	0.0280831	0.0286118	1	sp|Q13627|DYR1A_HUMAN	Dual specificity tyrosine-phosphorylation-regulated kinase 1A OS=Homo sapiens GN=DYRK1A PE=1 SV=2	0	1	73.3831	0	402
comp218000_c0_seq1	len=691	-1.33451	1.98636	0.0287643	1	sp|Q7TSU7|KIRR2_MOUSE	Kin of IRRE-like protein 2 OS=Mus musculus GN=Kirrel2 PE=1 SV=1	3e-08	1	26.1438	3e-08	153
comp258742_c8_seq3	len=443	-1.04987	0.745702	0.0288955	1	sp|Q80V23|ZNF32_MOUSE	Zinc finger protein 32 OS=Mus musculus GN=Znf32 PE=2 SV=1	7e-58	1	54.4828	7e-58	145
comp256033_c1_seq4	len=459	-2.04706	2.30235	0.0289298	1	sp|B3DK56|PTPRU_DANRE	Receptor-type tyrosine-protein phosphatase U OS=Danio rerio GN=ptpru PE=2 SV=1	5e-27	1	39.4904	5e-27	157
comp259080_c0_seq2	len=4572	-1.9256	0.916294	0.0290355	1	sp|Q5R7J9|IF4G2_PONAB	Eukaryotic translation initiation factor 4 gamma 2 OS=Pongo abelii GN=EIF4G2 PE=2 SV=2	1e-110	1	45.0226	1e-110	442
comp288979_c0_seq1	len=2052	-2.08155	4.45346	0.0290793	1	sp|Q5TZE1|BTB6B_DANRE	BTB/POZ domain-containing protein 6-B OS=Danio rerio GN=btbd6b PE=2 SV=1	3e-36	1	28.246	3e-36	439
comp244020_c0_seq1	len=323	1.06908	0.733432	0.029414	1	sp|A6H687|SAC31_MOUSE	SAC3 domain-containing protein 1 OS=Mus musculus GN=Sac3d1 PE=1 SV=1	3e-16	1	43.5644	3e-16	101
comp261489_c0_seq1	len=2746	-1.86258	2.51109	0.0297148	1	sp|Q6V0I7|FAT4_HUMAN	Protocadherin Fat 4 OS=Homo sapiens GN=FAT4 PE=1 SV=2	8e-81	1	30.4117	8e-81	753
comp251551_c1_seq2	len=549	-1.11458	2.55236	0.0300224	1	sp|Q8C525|M21D2_MOUSE	Protein MB21D2 OS=Mus musculus GN=Mb21d2 PE=1 SV=1	1e-06	1	33.3333	1e-06	60
comp246830_c1_seq1	len=330	-1.13161	1.59816	0.0300963	1	sp|P34618|CEC1_CAEEL	Chromo domain-containing protein cec-1 OS=Caenorhabditis elegans GN=cec-1 PE=2 SV=1	2e-06	1	50	2e-06	34
comp257194_c0_seq1	len=1814	-0.948246	3.1696	0.0301389	1	sp|Q6DHB5|LHPL3_DANRE	Lipoma HMGIC fusion partner-like 3 protein OS=Danio rerio GN=lhfpl3 PE=2 SV=1	4e-41	1	40.5556	4e-41	180
comp191759_c0_seq1	len=244	-1.08358	0.385361	0.0301981	1	sp|P21328|RTJK_DROME	RNA-directed DNA polymerase from mobile element jockey OS=Drosophila melanogaster GN=pol PE=1 SV=1	3e-08	1	38.5542	3e-08	83
comp250844_c1_seq1	len=598	1.11577	1.51485	0.0302604	1	sp|Q9CWV1|MCM8_MOUSE	DNA helicase MCM8 OS=Mus musculus GN=Mcm8 PE=1 SV=3	1e-28	1	67.0732	1e-28	82
comp237432_c0_seq1	len=542	-1.00259	0.93643	0.0303334	1	sp|E7F6T8|UBP37_DANRE	Ubiquitin carboxyl-terminal hydrolase 37 OS=Danio rerio GN=usp37 PE=2 SV=1	8e-22	1	44.697	8e-22	132
comp258020_c0_seq1	len=3450	2.29194	5.36817	0.0304887	1	sp|P05089|ARGI1_HUMAN	Arginase-1 OS=Homo sapiens GN=ARG1 PE=1 SV=2	2e-90	1	47.9365	2e-90	315
comp373186_c0_seq1	len=585	1.08976	2.07528	0.0306289	1	sp|Q9Y575|ASB3_HUMAN	Ankyrin repeat and SOCS box protein 3 OS=Homo sapiens GN=ASB3 PE=1 SV=1	3e-37	1	42.623	3e-37	183
comp216448_c0_seq1	len=379	1.18886	2.05276	0.0313138	1	sp|Q5RBE1|GBP1_PONAB	Interferon-induced guanylate-binding protein 1 OS=Pongo abelii GN=GBP1 PE=2 SV=1	4e-08	1	34.6154	4e-08	78
comp221006_c0_seq1	len=529	1.81096	1.65293	0.0319033	1	sp|Q8R420|ABCA3_MOUSE	ATP-binding cassette sub-family A member 3 OS=Mus musculus GN=Abca3 PE=2 SV=3	1e-32	1	40.8805	1e-32	159
comp230826_c2_seq1	len=368	-1.23289	1.16374	0.0320964	1	sp|Q502L2|PGAM5_DANRE	Serine/threonine-protein phosphatase PGAM5		NA			NA
comp251052_c0_seq1	len=2267	1.27593	1.99318	0.0321933	1	sp|Q99NH0|ANR17_MOUSE	Ankyrin repeat domain-containing protein 17 OS=Mus musculus GN=Ankrd17 PE=1 SV=2	1e-23	1	29.2994	1e-23	314
comp244828_c0_seq1	len=1579	1.15557	3.62995	0.0325108	1	sp|A8MW99|MEI4L_HUMAN	Meiosis-specific protein MEI4-like OS=Homo sapiens GN=MEI4 PE=3 SV=1	4e-11	1	28.3784	4e-11	148
comp208078_c0_seq1	len=263	1.16375	0.30029	0.0325455	1	sp|Q8TEM1|PO210_HUMAN	Nuclear pore membrane glycoprotein 210 OS=Homo sapiens GN=NUP210 PE=1 SV=3	2e-12	1	37.931	2e-12	87
comp203515_c1_seq1	len=676	-1.34527	1.74266	0.0329506	1	sp|P00528|SRC64_DROME	Tyrosine-protein kinase Src64B OS=Drosophila melanogaster GN=Src64B PE=1 SV=3	3e-06	1	50	3e-06	38
comp232901_c0_seq1	len=202	1.87051	2.31298	0.0330438	1	sp|P0DKT3|TU93_GEMSP	Turripeptide Gsp9,3 OS=Gemmula speciosa PE=2 SV=1	3e-13	1	50.9804	3e-13	51
comp261557_c0_seq2	len=2131	1.47903	1.38593	0.0335253	1	sp|Q8NHY3|GA2L2_HUMAN	GAS2-like protein 2 OS=Homo sapiens GN=GAS2L2 PE=2 SV=1	8e-31	1	35.567	8e-31	194
comp248614_c0_seq1	len=3023	0.986139	4.06639	0.0337908	1	sp|Q8WWK9|CKAP2_HUMAN	Cytoskeleton-associated protein 2 OS=Homo sapiens GN=CKAP2 PE=1 SV=1	2e-08	1	20.765	2e-08	549
comp237636_c0_seq1	len=371	-1.14202	0.101609	0.0338278	1	sp|Q86XU0|ZN677_HUMAN	Zinc finger protein 677 OS=Homo sapiens GN=ZNF677 PE=2 SV=1	1e-30	1	41.5254	1e-30	118
comp205235_c1_seq1	len=320	-0.972993	1.02502	0.0339073	1	sp|Q5RA75|F135A_PONAB	Protein FAM135A OS=Pongo abelii GN=FAM135A PE=2 SV=1	2e-06	1	28.3951	2e-06	81
comp262576_c2_seq5	len=1522	1.5196	0.314788	0.0342059	1	sp|Q8R420|ABCA3_MOUSE	ATP-binding cassette sub-family A member 3 OS=Mus musculus GN=Abca3 PE=2 SV=3	4e-85	1	32.5536	4e-85	513
comp230286_c2_seq1	len=1496	1.41382	2.62527	0.0343171	1	sp|P04323|POL3_DROME	Retrovirus-related Pol polyprotein from transposon 17,6 OS=Drosophila melanogaster GN=pol PE=4 SV=1	7e-39	1	38.3621	7e-39	232
comp260310_c1_seq23	len=737	1.07759	1.00686	0.0344568	1	sp|P37709|TRHY_RABIT	Trichohyalin OS=Oryctolagus cuniculus GN=TCHH PE=2 SV=1	2e-06	1	29.4118	2e-06	136
comp207267_c0_seq1	len=270	-1.05418	0.0627537	0.0344805	1	sp|P39052|DYN2_RAT	Dynamin-2 OS=Rattus norvegicus GN=Dnm2 PE=1 SV=1	5e-41	1	80	5e-41	90
comp248832_c0_seq1	len=723	0.949178	3.65994	0.0354191	1	sp|O93427|CVXB_CRODU	Convulxin subunit beta OS=Crotalus durissus terrificus PE=1 SV=1	9e-12	1	27.9279	9e-12	111
comp241984_c0_seq1	len=855	1.29148	1.60363	0.0355446	1	sp|Q0VAA2|CN16B_HUMAN	Uncharacterized protein C14orf166B OS=Homo sapiens GN=C14orf166B PE=2 SV=2	7e-11	1	33.8983	7e-11	118
comp259086_c0_seq2	len=2140	1.08281	0.658119	0.0356076	1	sp|O75204|TM127_HUMAN	Transmembrane protein 127 OS=Homo sapiens GN=TMEM127 PE=1 SV=1	2e-18	1	27.459	2e-18	244
comp221922_c1_seq1	len=1128	-0.989073	2.1151	0.0357317	1	sp|Q14012|KCC1A_HUMAN	Calcium/calmodulin-dependent protein kinase type 1 OS=Homo sapiens GN=CAMK1 PE=1 SV=1	2e-77	1	76.5517	2e-77	145
comp244008_c0_seq2	len=368	-1.28798	0.779712	0.0357404	1	sp|Q147U1|ZN846_HUMAN	Zinc finger protein 846 OS=Homo sapiens GN=ZNF846 PE=1 SV=2	3e-16	1	33.0579	3e-16	121
comp219849_c1_seq1	len=637	-1.05991	1.97572	0.0361856	1	sp|Q2XWK0|SVOP_XENLA	Synaptic vesicle 2-related protein OS=Xenopus laevis GN=svop PE=2 SV=1	1e-86	1	59.434	1e-86	212
comp253519_c1_seq3	len=299	1.3504	1.25376	0.0363176	1	sp|P04572|SCP_PERVT	Sarcoplasmic calcium-binding protein OS=Perinereis vancaurica tetradentata PE=1 SV=1	2e-07	1	43.75	2e-07	48
comp259553_c0_seq3	len=333	-0.960619	3.43072	0.0364977	1	sp|P15145|AMPN_PIG	Aminopeptidase N OS=Sus scrofa GN=ANPEP PE=1 SV=4	2e-07	1	25.9615	2e-07	104
comp252530_c0_seq1	len=1154	1.16712	3.2351	0.0365336	1	sp|O75095|MEGF6_HUMAN	Multiple epidermal growth factor-like domains protein 6 OS=Homo sapiens GN=MEGF6 PE=1 SV=4	3e-71	1	47.1698	3e-71	212
comp257995_c0_seq14	len=3163	1.44606	2.77719	0.0365791	1	sp|Q6PW23|MX_EPICO	Interferon-induced GTP-binding protein Mx OS=Epinephelus coioides GN=mx PE=2 SV=1	1e-137	1	38.9231	1e-137	650
comp182219_c0_seq1	len=418	1.19472	0.447401	0.0365809	1	sp|Q60847|COCA1_MOUSE	Collagen alpha-1(XII) chain OS=Mus musculus GN=Col12a1 PE=2 SV=3	5e-08	1	33.9806	5e-08	103
comp258703_c0_seq8	len=945	1.20867	1.37003	0.0366001	1	sp|A6NJU9|YP038_HUMAN	Putative NPIP-like protein LOC613037 OS=Homo sapiens PE=5 SV=4	5e-07	1	26.7327	5e-07	101
comp262517_c0_seq1	len=6708	-1.01154	1.2215	0.0367633	1	sp|O08746|MATN2_MOUSE	Matrilin-2 OS=Mus musculus GN=Matn2 PE=2 SV=2	1e-25	1	28.6184	1e-25	304
comp398465_c0_seq1	len=301	-1.00001	0.460532	0.0367675	1	sp|O88379|BAZ1A_MOUSE	Bromodomain adjacent to zinc finger domain protein 1A OS=Mus musculus GN=Baz1a PE=1 SV=3	2e-21	1	47.191	2e-21	89
comp251408_c0_seq3	len=1424	-1.20638	5.48634	0.0370519	1	sp|O88572|LRP6_MOUSE	Low-density lipoprotein receptor-related protein 6 OS=Mus musculus GN=Lrp6 PE=1 SV=1	2e-34	1	26.3923	2e-34	413
comp248202_c0_seq3	len=958	-0.919797	3.01782	0.0371184	1	sp|Q9HAR2|LPHN3_HUMAN	Latrophilin-3 OS=Homo sapiens GN=LPHN3 PE=1 SV=2	4e-29	1	29.4545	4e-29	275
comp261794_c2_seq1	len=3502	-1.59494	-0.0501122	0.0374256	1	sp|A5WW21|RASEF_DANRE	Ras and EF-hand domain-containing protein OS=Danio rerio GN=rasef PE=2 SV=1	1e-55	1	26.4241	1e-55	632
comp215628_c0_seq1	len=279	-1.06318	0.712823	0.0379761	1	sp|O02751|CFDP2_BOVIN	Craniofacial development protein 2 OS=Bos taurus GN=CFDP2 PE=1 SV=2	2e-09	1	45.283	2e-09	53
comp217475_c0_seq1	len=221	1.31977	2.15151	0.0381713	1	sp|P04571|SCP_HEDDI	Sarcoplasmic calcium-binding protein OS=Hediste diversicolor PE=1 SV=1	7e-07	1	43.1818	7e-07	44
comp146187_c0_seq1	len=360	1.17946	1.23593	0.0382105	1	sp|Q640B4|MUS81_XENTR	Crossover junction endonuclease MUS81 OS=Xenopus tropicalis GN=mus81 PE=2 SV=1	3e-45	1	61.7886	3e-45	123
comp259639_c0_seq4	len=762	-1.81375	1.84612	0.0383617	1	sp|P13696|PEBP1_BOVIN	Phosphatidylethanolamine-binding protein 1 OS=Bos taurus GN=PEBP1 PE=1 SV=2	1e-69	1	62.1302	1e-69	169
comp229380_c0_seq1	len=637	0.978271	2.51904	0.0383884	1	sp|Q9CWB7|YD286_MOUSE	Glutaredoxin-like protein C5orf63 homolog OS=Mus musculus PE=1 SV=1	3e-26	1	52.0833	3e-26	96
comp179223_c0_seq1	len=211	-1.83829	0.626773	0.0387149	1	sp|P28218|PTP26_STYPL	Tyrosine-protein phosphatase 26 (Fragment) OS=Styela plicata GN=STY-26 PE=3 SV=1	1e-13	1	41.0959	1e-13	73
comp215670_c0_seq1	len=404	1.10582	0.970186	0.0389649	1	sp|Q9EQN5|SMBP2_RAT	DNA-binding protein SMUBP-2 OS=Rattus norvegicus GN=Ighmbp2 PE=1 SV=1	1e-39	1	64.4068	1e-39	118
comp254720_c0_seq2	len=1850	-1.60597	0.995893	0.0393968	1	sp|Q05AY2|EI3EA_XENLA	Eukaryotic translation initiation factor 3 subunit E-A OS=Xenopus laevis GN=eif3e-a PE=2 SV=1	0	1	70.8145	0	442
comp219866_c0_seq1	len=288	-1.07034	0.357386	0.0395538	1	sp|Q95UN8|M3KSL_DROME	Mitogen-activated protein kinase kinase kinase OS=Drosophila melanogaster GN=slpr PE=1 SV=1	1e-19	1	47.9167	1e-19	96
comp242523_c0_seq1	len=706	1.01182	1.17932	0.0396484	1	sp|Q2KID2|NTHL1_BOVIN	Endonuclease III-like protein 1 OS=Bos taurus GN=NTHL1 PE=2 SV=1	1e-81	1	60.733	1e-81	191
comp191625_c0_seq1	len=374	1.16446	0.316185	0.0401722	1	sp|Q8N0Z8|PUSL1_HUMAN	tRNA pseudouridine synthase-like 1 OS=Homo sapiens GN=PUSL1 PE=1 SV=1	6e-11	1	35.2381	6e-11	105
comp241779_c1_seq1	len=532	-1.25831	2.43305	0.0413063	1	sp|Q3UHL1|CAMKV_MOUSE	CaM kinase-like vesicle-associated protein OS=Mus musculus GN=Camkv PE=1 SV=2	8e-06	1	28.2051	8e-06	117
comp252148_c2_seq2	len=771	0.978457	3.32419	0.0414615	1	sp|P23730|IFEA_ASCSU	Intermediate filament protein A (Fragment) OS=Ascaris suum PE=1 SV=1	3e-24	1	48.5714	3e-24	105
comp255483_c0_seq1	len=1794	-1.16976	4.33645	0.0415213	1	sp|Q5NVN3|B4GT3_PONAB	Beta-1		NA			NA
comp260104_c1_seq8	len=1120	1.888	1.91707	0.0416895	1	sp|A9JRD8|BTB6A_DANRE	BTB/POZ domain-containing protein 6-A OS=Danio rerio GN=btbd6a PE=1 SV=1	8e-19	1	26.3699	8e-19	292
comp260199_c0_seq7	len=561	-0.96094	6.44899	0.0424342	1	sp|Q6RY07|CHIA_RAT	Acidic mammalian chitinase OS=Rattus norvegicus GN=Chia PE=2 SV=1	6e-47	1	45.8101	6e-47	179
comp228579_c0_seq1	len=302	-0.880895	1.014	0.0426423	1	sp|Q91ZA3|PCCA_MOUSE	Propionyl-CoA carboxylase alpha chain		NA			NA
comp220987_c0_seq1	len=673	1.05524	1.90144	0.0426428	1	sp|Q7M3K2|PELET_DROME	Transposable element P transposase OS=Drosophila melanogaster GN=T PE=1 SV=2	5e-11	1	34.1176	5e-11	170
comp210392_c0_seq1	len=316	-0.924582	0.330009	0.0427153	1	sp|Q7LHG5|YI31B_YEAST	Transposon Ty3-I Gag-Pol polyprotein OS=Saccharomyces cerevisiae (strain ATCC 204508 / S288c) GN=TY3B-I PE=3 SV=2	7e-10	1	50	7e-10	58
comp247706_c0_seq1	len=1477	0.930224	2.96569	0.0428301	1	sp|Q5VUE5|CA053_HUMAN	Uncharacterized protein C1orf53 OS=Homo sapiens GN=C1orf53 PE=2 SV=1	4e-15	1	35.8209	4e-15	134
comp256629_c5_seq4	len=614	-1.39516	2.49076	0.0428458	1	sp|Q8N2E2|VWDE_HUMAN	von Willebrand factor D and EGF domain-containing protein OS=Homo sapiens GN=VWDE PE=2 SV=4	2e-12	1	35.1145	2e-12	131
comp254171_c0_seq1	len=2993	-0.983597	2.48888	0.0429318	1	sp|Q8NE22|SETD9_HUMAN	SET domain-containing protein 9 OS=Homo sapiens GN=SETD9 PE=2 SV=2	2e-57	1	37.1681	2e-57	339
comp255817_c0_seq1	len=1596	1.36959	0.121435	0.0431547	1	sp|Q2KIK0|SUGT1_BOVIN	Suppressor of G2 allele of SKP1 homolog OS=Bos taurus GN=SUGT1 PE=2 SV=1	2e-79	1	40.4558	2e-79	351
comp258310_c0_seq4	len=1867	2.04307	1.30957	0.0431854	1	sp|O73888|HPGDS_CHICK	Hematopoietic prostaglandin D synthase OS=Gallus gallus GN=HPGDS PE=1 SV=3	7e-38	1	40	7e-38	200
comp253652_c2_seq6	len=390	-0.92814	1.76699	0.0433823	1	sp|Q9LU36|4CL4_ARATH	4-coumarate--CoA ligase 4 OS=Arabidopsis thaliana GN=4CL4 PE=1 SV=1	2e-10	1	46.4286	2e-10	56
comp180215_c0_seq1	len=1269	0.953129	3.19691	0.0436091	1	sp|Q8HXA6|ASB15_BOVIN	Ankyrin repeat and SOCS box protein 15 OS=Bos taurus GN=ASB15 PE=2 SV=2	7e-20	1	26.7409	7e-20	359
comp259623_c1_seq9	len=1575	-1.01264	0.824879	0.0437399	1	sp|Q9LIG0|Y3136_ARATH	Clavaminate synthase-like protein At3g21360 OS=Arabidopsis thaliana GN=At3g21360 PE=1 SV=1	2e-72	1	38.4375	2e-72	320
comp255442_c0_seq1	len=1693	-1.16054	4.26581	0.0438353	1	sp|Q9LIG0|Y3136_ARATH	Clavaminate synthase-like protein At3g21360 OS=Arabidopsis thaliana GN=At3g21360 PE=1 SV=1	3e-71	1	37.5	3e-71	320
comp235894_c0_seq2	len=536	1.20688	2.45922	0.0439432	1	sp|Q54SZ6|Y8359_DICDI	Putative uncharacterized protein DDB_G0282133 OS=Dictyostelium discoideum GN=DDB_G0282133 PE=4 SV=2	4e-06	1	32.1429	4e-06	112
comp260629_c0_seq1	len=2676	1.25775	0.41703	0.0441648	1	sp|O35136|NCAM2_MOUSE	Neural cell adhesion molecule 2 OS=Mus musculus GN=Ncam2 PE=1 SV=1	2e-06	1	22.1429	2e-06	280
comp260908_c0_seq3	len=2132	1.22187	0.597886	0.0442692	1	sp|Q6PAW2|UBP16_XENLA	Ubiquitin carboxyl-terminal hydrolase 16 OS=Xenopus laevis GN=usp16 PE=2 SV=1	2e-22	1	29.646	2e-22	226
comp260935_c0_seq1	len=847	1.09023	1.35922	0.0450509	1	sp|Q92911|SC5A5_HUMAN	Sodium/iodide cotransporter OS=Homo sapiens GN=SLC5A5 PE=1 SV=1	9e-80	1	43.3213	9e-80	277
comp247813_c1_seq1	len=911	1.68857	2.35693	0.0451583	1	sp|Q8C8H8|KY_MOUSE	Kyphoscoliosis peptidase OS=Mus musculus GN=Ky PE=1 SV=1	6e-09	1	25	6e-09	164
comp250746_c0_seq1	len=1407	-0.886516	3.21846	0.0453468	1	sp|Q91WD4|CG025_MOUSE	UPF0415 protein C7orf25 homolog OS=Mus musculus PE=2 SV=1	3e-42	1	47.093	3e-42	172
comp216318_c0_seq1	len=794	-0.997012	3.52796	0.0454394	1	sp|Q4UMP3|Y314_RICFE	Putative ankyrin repeat protein RF_0314 OS=Rickettsia felis (strain ATCC VR-1525 / URRWXCal2) GN=RF_0314 PE=4 SV=1	1e-06	1	28.0992	1e-06	121
comp238152_c1_seq2	len=840	1.48054	1.90798	0.0458927	1	sp|Q96NG3|TTC25_HUMAN	Tetratricopeptide repeat protein 25 OS=Homo sapiens GN=TTC25 PE=2 SV=2	3e-15	1	35.7724	3e-15	123
comp253202_c4_seq3	len=823	-1.0386	0.449658	0.0459812	1	sp|P23049|SEA_AVIET	Tyrosine-protein kinase transforming protein SEA OS=Avian erythroblastosis virus (strain S13) GN=V-SEA PE=3 SV=2	6e-80	1	50.3817	6e-80	262
comp198994_c0_seq1	len=343	0.973162	0.779757	0.046327	1	sp|Q9VUL9|FUCTA_DROME	Glycoprotein 3-alpha-L-fucosyltransferase A OS=Drosophila melanogaster GN=FucTA PE=1 SV=2	3e-17	1	38.1443	3e-17	97
comp247573_c0_seq2	len=738	0.940589	0.448697	0.0463357	1	sp|Q8VE42|ANR49_MOUSE	Ankyrin repeat domain-containing protein 49 OS=Mus musculus GN=Ankrd49 PE=1 SV=1	1e-53	1	52.071	1e-53	169
comp259426_c7_seq1	len=389	0.968554	0.947857	0.0467619	1	sp|Q01484|ANK2_HUMAN	Ankyrin-2 OS=Homo sapiens GN=ANK2 PE=1 SV=4	2e-14	1	40.367	2e-14	109
comp249847_c0_seq2	len=1001	1.23212	1.49216	0.047317	1	sp|A7Z052|WDR6_BOVIN	WD repeat-containing protein 6 OS=Bos taurus GN=WDR6 PE=2 SV=1	1e-10	1	23.2295	1e-10	353
comp255035_c0_seq2	len=1773	1.43389	0.414894	0.0476404	1	sp|Q9SF85|ADK1_ARATH	Adenosine kinase 1 OS=Arabidopsis thaliana GN=ADK1 PE=1 SV=1	3e-82	1	38.806	3e-82	335
comp256408_c0_seq1	len=1639	0.970781	3.55995	0.0476472	1	sp|B1H349|SOX6_XENTR	Transcription factor Sox-6 OS=Xenopus tropicalis GN=sox6 PE=2 SV=1	2e-48	1	59.1195	2e-48	159
comp251867_c0_seq1	len=352	1.05538	0.337527	0.0476929	1	sp|P35991|BTK_MOUSE	Tyrosine-protein kinase BTK OS=Mus musculus GN=Btk PE=1 SV=4	9e-23	1	47.4138	9e-23	116
comp252290_c4_seq1	len=628	1.31261	0.757175	0.0477438	1	sp|Q8N9F8|ZN454_HUMAN	Zinc finger protein 454 OS=Homo sapiens GN=ZNF454 PE=2 SV=2	2e-55	1	56.6434	2e-55	143
comp251814_c1_seq1	len=1261	0.950011	2.08598	0.0477589	1	sp|P17342|ANPRC_HUMAN	Atrial natriuretic peptide receptor 3 OS=Homo sapiens GN=NPR3 PE=1 SV=2	4e-19	1	30.4813	4e-19	187
comp177338_c0_seq1	len=555	-0.930997	1.94499	0.0477828	1	sp|P86411|RGPA2_RAT	Ral GTPase-activating protein subunit alpha-2 OS=Rattus norvegicus GN=Ralgapa2 PE=1 SV=1	2e-60	1	56.1798	2e-60	178
comp237888_c0_seq1	len=938	1.01255	2.87107	0.0480952	1	sp|P51643|ARF1_XENLA	ADP-ribosylation factor 1 OS=Xenopus laevis GN=arf1 PE=2 SV=2	1e-82	1	68.5083	1e-82	181
comp260750_c4_seq1	len=438	1.44849	2.53728	0.0481177	1	sp|P13277|CYSP1_HOMAM	Digestive cysteine proteinase 1 OS=Homarus americanus GN=LCP1 PE=1 SV=2	2e-41	1	58.6207	2e-41	116
comp150541_c0_seq1	len=231	-0.913304	0.729109	0.0484237	1	sp|F1M386|RPGF2_RAT	Rap guanine nucleotide exchange factor 2 OS=Rattus norvegicus GN=Rapgef2 PE=1 SV=2	8e-17	1	51.4286	8e-17	70
comp261879_c0_seq24	len=611	1.16934	1.54906	0.0485151	1	sp|Q8W4N3|UBP2_ARATH	Ubiquitin carboxyl-terminal hydrolase 2 OS=Arabidopsis thaliana GN=UBP2 PE=1 SV=2	9e-13	1	40	9e-13	95
comp253301_c0_seq1	len=1789	-0.980627	7.54722	0.048541	1	sp|Q00649|HSPB1_CHICK	Heat shock protein beta-1 OS=Gallus gallus GN=HSPB1 PE=2 SV=1	4e-14	1	34.4828	4e-14	116
comp260970_c0_seq2	len=2037	1.20939	0.0564752	0.0485918	1	sp|Q8VEK0|CC50A_MOUSE	Cell cycle control protein 50A OS=Mus musculus GN=Tmem30a PE=1 SV=1	1e-108	1	53.1722	1e-108	331
comp135490_c0_seq1	len=252	1.01539	0.333629	0.0486531	1	sp|Q922S4|PDE2A_MOUSE	cGMP-dependent 3'		NA			NA
comp230905_c0_seq1	len=557	-0.97574	0.583318	0.0486664	1	sp|E7FDB3|NANO1_DANRE	Nanos homolog 1 OS=Danio rerio GN=nanos1 PE=2 SV=1	5e-23	1	55.7143	5e-23	70
comp254211_c6_seq1	len=720	-1.2736	0.931624	0.0490127	1	sp|Q95078|CP18A_DROME	Cytochrome P450 18a1 OS=Drosophila melanogaster GN=Cyp18a1 PE=2 SV=2	3e-21	1	42.4528	3e-21	106
comp259963_c0_seq1	len=2279	-1.0112	0.506855	0.0492576	1	sp|P54939|TLN1_CHICK	Talin-1 OS=Gallus gallus GN=TLN1 PE=1 SV=2	1e-101	1	60.1974	1e-101	304
comp255195_c0_seq1	len=1987	-1.10339	4.74652	0.0494728	1	sp|P47825|TAF4_DROME	Transcription initiation factor TFIID subunit 4 OS=Drosophila melanogaster GN=Taf4 PE=1 SV=1	4e-13	1	33.8028	4e-13	142
comp256214_c0_seq1	len=748	0.923858	1.61974	0.0494795	1	sp|Q9V4A7|PLXB_DROME	Plexin-B OS=Drosophila melanogaster GN=plexB PE=1 SV=2	7e-07	1	29.1262	7e-07	103
comp258740_c0_seq1	len=1629	-1.1677	4.42383	0.0494975	1	sp|Q96JQ5|M4A4A_HUMAN	Membrane-spanning 4-domains subfamily A member 4A OS=Homo sapiens GN=MS4A4A PE=2 SV=1	5e-09	1	29.3233	5e-09	133
comp231876_c0_seq2	len=615	7.22587	0.964393	2.31e-18	1.28e-13	NA	NA	NA	NA	NA	NA	NA
comp259444_c2_seq3	len=1260	-9.31788	2.0676	1.04e-13	2.87e-09	NA	NA	NA	NA	NA	NA	NA
comp138374_c0_seq1	len=315	1.07834	0.837211	0.0446329	1	NA	NA	NA	NA	NA	NA	NA
comp254011_c1_seq1	len=497	4.63839	2.1328	2.7e-12	2.88e-08	NA	NA	NA	NA	NA	NA	NA
comp256512_c1_seq4	len=221	-9.49056	1.08031	2.93e-12	2.88e-08	NA	NA	NA	NA	NA	NA	NA
comp240050_c0_seq1	len=455	5.59912	0.745309	3.12e-12	2.88e-08	NA	NA	NA	NA	NA	NA	NA
comp249498_c2_seq1	len=554	-1.41411	2.09877	0.00466196	0.691885	NA	NA	NA	NA	NA	NA	NA
comp270350_c0_seq1	len=232	8.1501	2.49249	1.47e-11	1.02e-07	NA	NA	NA	NA	NA	NA	NA
comp241300_c0_seq2	len=464	-1.7651	0.220686	0.00466585	0.691885	NA	NA	NA	NA	NA	NA	NA
comp220183_c0_seq1	len=371	1.27854	1.14653	0.0165064	1	NA	NA	NA	NA	NA	NA	NA
comp240050_c0_seq2	len=291	-8.21558	0.933492	5.39e-11	2.71e-07	NA	NA	NA	NA	NA	NA	NA
comp270484_c0_seq1	len=502	7.75249	3.97302	6.07e-11	2.8e-07	NA	NA	NA	NA	NA	NA	NA
comp243409_c0_seq1	len=295	-3.96693	0.486388	9.34e-11	3.98e-07	NA	NA	NA	NA	NA	NA	NA
comp260947_c0_seq6	len=603	1.18291	1.26425	0.0166612	1	NA	NA	NA	NA	NA	NA	NA
comp166340_c0_seq1	len=312	2.55266	0.954086	0.00480543	0.699749	NA	NA	NA	NA	NA	NA	NA
comp257610_c1_seq3	len=1252	-7.65461	3.76509	3.6e-10	1.22e-06	NA	NA	NA	NA	NA	NA	NA
comp179188_c0_seq1	len=310	8.73397	1.53136	3.74e-10	1.22e-06	NA	NA	NA	NA	NA	NA	NA
comp238792_c1_seq1	len=238	-1.33516	1.03059	0.00483651	0.700293	NA	NA	NA	NA	NA	NA	NA
comp261285_c4_seq5	len=390	6.89447	1.64366	1.31e-09	3.83e-06	NA	NA	NA	NA	NA	NA	NA
comp240050_c0_seq3	len=414	-6.17313	0.378598	1.7e-09	4.71e-06	NA	NA	NA	NA	NA	NA	NA
comp255355_c1_seq1	len=210	-1.49825	0.270452	0.00487779	0.700767	NA	NA	NA	NA	NA	NA	NA
comp258252_c2_seq2	len=222	5.34069	0.909101	2.28e-09	5.73e-06	NA	NA	NA	NA	NA	NA	NA
comp166181_c0_seq1	len=761	-5.45165	1.51699	2.75e-09	6.6e-06	NA	NA	NA	NA	NA	NA	NA
comp249047_c0_seq5	len=682	9.07448	0.980459	4.32e-09	9.85e-06	NA	NA	NA	NA	NA	NA	NA
comp316903_c0_seq1	len=393	9.65142	1.75031	4.45e-09	9.85e-06	NA	NA	NA	NA	NA	NA	NA
comp223464_c0_seq1	len=588	8.61072	0.696214	4.75e-09	1.01e-05	NA	NA	NA	NA	NA	NA	NA
comp222990_c0_seq1	len=871	-1.12533	1.32703	0.0171823	1	NA	NA	NA	NA	NA	NA	NA
comp243409_c1_seq1	len=580	-3.07428	1.54014	7.71e-09	1.52e-05	NA	NA	NA	NA	NA	NA	NA
comp256812_c0_seq1	len=3198	6.25575	1.19247	8.76e-09	1.67e-05	NA	NA	NA	NA	NA	NA	NA
comp261694_c0_seq1	len=350	8.6937	0.897003	1.86e-08	3.42e-05	NA	NA	NA	NA	NA	NA	NA
comp178594_c0_seq1	len=734	-2.82493	2.50445	1.94e-08	3.46e-05	NA	NA	NA	NA	NA	NA	NA
comp260235_c1_seq2	len=328	9.04518	1.30232	4.03e-08	6.97e-05	NA	NA	NA	NA	NA	NA	NA
comp279595_c0_seq1	len=632	-3.73843	3.63233	4.92e-08	8.25e-05	NA	NA	NA	NA	NA	NA	NA
comp246742_c0_seq1	len=393	-3.33776	0.291618	5.22e-08	8.5e-05	NA	NA	NA	NA	NA	NA	NA
comp202738_c0_seq1	len=346	2.26457	1.00423	0.00532366	0.735751	NA	NA	NA	NA	NA	NA	NA
comp236142_c2_seq1	len=475	-1.26007	0.919839	0.00533342	0.735751	NA	NA	NA	NA	NA	NA	NA
comp217491_c0_seq1	len=698	-3.92405	2.05514	1.11e-07	0.000165711	NA	NA	NA	NA	NA	NA	NA
comp263720_c0_seq1	len=1942	-4.71936	6.33335	1.21e-07	0.000174816	NA	NA	NA	NA	NA	NA	NA
comp260072_c2_seq1	len=722	-7.27435	1.44334	1.23e-07	0.000174816	NA	NA	NA	NA	NA	NA	NA
comp211087_c0_seq1	len=960	4.56058	2.0254	1.7e-07	0.000235629	NA	NA	NA	NA	NA	NA	NA
comp255535_c3_seq2	len=677	-3.72926	3.90756	1.78e-07	0.000240609	NA	NA	NA	NA	NA	NA	NA
comp234594_c1_seq1	len=373	1.35138	1.08019	0.00545995	0.743831	NA	NA	NA	NA	NA	NA	NA
comp229028_c0_seq1	len=375	8.17615	0.531668	2.06e-07	0.000265126	NA	NA	NA	NA	NA	NA	NA
comp255351_c0_seq5	len=1334	4.19255	3.68388	2.96e-07	0.000372693	NA	NA	NA	NA	NA	NA	NA
comp250856_c0_seq1	len=968	4.0979	0.834385	3.12e-07	0.000383648	NA	NA	NA	NA	NA	NA	NA
comp205736_c0_seq1	len=270	-3.30484	-0.0691468	3.46e-07	0.000416501	NA	NA	NA	NA	NA	NA	NA
comp228119_c0_seq1	len=269	1.79682	0.041792	0.00567848	0.764191	NA	NA	NA	NA	NA	NA	NA
comp259856_c3_seq1	len=329	-2.60812	0.336393	4.47e-07	0.000515042	NA	NA	NA	NA	NA	NA	NA
comp205383_c1_seq1	len=225	-4.98669	-0.25359	4.73e-07	0.000534051	NA	NA	NA	NA	NA	NA	NA
comp253277_c3_seq1	len=1644	-5.71878	2.41754	6.06e-07	0.000670894	NA	NA	NA	NA	NA	NA	NA
comp261640_c0_seq4	len=728	3.55072	2.13575	6.48e-07	0.000702642	NA	NA	NA	NA	NA	NA	NA
comp242731_c0_seq2	len=513	7.92971	1.2376	9.51e-07	0.00101159	NA	NA	NA	NA	NA	NA	NA
comp236359_c0_seq1	len=426	-2.84981	1.36382	1.05e-06	0.00109358	NA	NA	NA	NA	NA	NA	NA
comp259695_c0_seq2	len=764	7.38541	1.48267	1.09e-06	0.0011161	NA	NA	NA	NA	NA	NA	NA
comp248483_c0_seq3	len=312	7.18428	0.60178	1.31e-06	0.00131756	NA	NA	NA	NA	NA	NA	NA
comp237505_c0_seq1	len=348	5.1861	0.895417	1.47e-06	0.00143509	NA	NA	NA	NA	NA	NA	NA
comp251714_c0_seq1	len=324	-6.82121	-0.289145	1.48e-06	0.00143509	NA	NA	NA	NA	NA	NA	NA
comp260498_c1_seq4	len=657	1.98734	1.83987	0.00599001	0.783852	NA	NA	NA	NA	NA	NA	NA
comp150302_c0_seq1	len=472	8.39089	1.33266	1.59e-06	0.00149477	NA	NA	NA	NA	NA	NA	NA
comp259652_c2_seq15	len=302	3.30062	0.459924	1.7e-06	0.00156404	NA	NA	NA	NA	NA	NA	NA
comp185299_c0_seq1	len=470	-1.9172	1.05976	0.00609813	0.788608	NA	NA	NA	NA	NA	NA	NA
comp129429_c0_seq1	len=306	1.40401	0.385257	0.00610196	0.788608	NA	NA	NA	NA	NA	NA	NA
comp251198_c0_seq1	len=440	-3.33222	1.53802	3.32e-06	0.00291561	NA	NA	NA	NA	NA	NA	NA
comp208914_c0_seq1	len=479	3.563	0.857011	3.84e-06	0.00331534	NA	NA	NA	NA	NA	NA	NA
comp256255_c0_seq1	len=347	-1.15186	2.21599	0.0187703	1	NA	NA	NA	NA	NA	NA	NA
comp236359_c1_seq1	len=444	-2.95239	1.35452	4.46e-06	0.0037203	NA	NA	NA	NA	NA	NA	NA
comp222530_c0_seq1	len=286	6.90126	0.661853	4.51e-06	0.0037203	NA	NA	NA	NA	NA	NA	NA
comp163032_c0_seq1	len=483	7.8173	0.500934	4.61e-06	0.00375359	NA	NA	NA	NA	NA	NA	NA
comp216580_c0_seq1	len=393	5.68196	5.56477	4.84e-06	0.00387797	NA	NA	NA	NA	NA	NA	NA
comp179801_c0_seq1	len=346	-1.24971	1.2434	0.018937	1	NA	NA	NA	NA	NA	NA	NA
comp247580_c2_seq4	len=383	2.08942	1.17142	0.00621069	0.7897	NA	NA	NA	NA	NA	NA	NA
comp256512_c1_seq15	len=426	-4.04079	2.43711	5.71e-06	0.00438522	NA	NA	NA	NA	NA	NA	NA
comp166853_c0_seq1	len=561	3.95848	0.382688	5.9e-06	0.00447153	NA	NA	NA	NA	NA	NA	NA
comp488665_c0_seq1	len=275	-1.38017	0.117532	0.00636395	0.800104	NA	NA	NA	NA	NA	NA	NA
comp242459_c0_seq1	len=753	1.3911	2.11127	0.00636632	0.800104	NA	NA	NA	NA	NA	NA	NA
comp253410_c0_seq3	len=274	3.86333	0.507923	9.67e-06	0.00703775	NA	NA	NA	NA	NA	NA	NA
comp256629_c5_seq1	len=221	-2.70874	0.902696	1.28e-05	0.00916257	NA	NA	NA	NA	NA	NA	NA
comp254372_c0_seq2	len=326	5.08977	5.102	1.35e-05	0.00958086	NA	NA	NA	NA	NA	NA	NA
comp233205_c0_seq2	len=527	6.90286	0.325825	1.49e-05	0.0104113	NA	NA	NA	NA	NA	NA	NA
comp254011_c3_seq1	len=233	2.52423	1.45174	1.53e-05	0.0105149	NA	NA	NA	NA	NA	NA	NA
comp254932_c0_seq1	len=703	3.73236	1.12374	1.54e-05	0.0105149	NA	NA	NA	NA	NA	NA	NA
comp213002_c0_seq1	len=316	4.13936	2.9154	1.61e-05	0.0108327	NA	NA	NA	NA	NA	NA	NA
comp260904_c1_seq15	len=611	1.48941	2.71534	0.00650362	0.803938	NA	NA	NA	NA	NA	NA	NA
comp259676_c2_seq1	len=292	2.81783	1.93249	1.76e-05	0.0115897	NA	NA	NA	NA	NA	NA	NA
comp223465_c0_seq1	len=611	2.8762	1.47525	2.04e-05	0.0132544	NA	NA	NA	NA	NA	NA	NA
comp262237_c3_seq2	len=356	3.48104	0.0263065	2.24e-05	0.0144353	NA	NA	NA	NA	NA	NA	NA
comp257298_c0_seq2	len=848	3.41104	0.541801	2.3e-05	0.0145985	NA	NA	NA	NA	NA	NA	NA
comp255325_c2_seq13	len=633	2.21284	0.197196	0.00667055	0.815461	NA	NA	NA	NA	NA	NA	NA
comp247761_c0_seq1	len=739	1.49018	2.69389	0.00667867	0.815461	NA	NA	NA	NA	NA	NA	NA
comp254011_c0_seq2	len=298	2.2797	1.81887	2.69e-05	0.0165496	NA	NA	NA	NA	NA	NA	NA
comp246714_c3_seq2	len=464	-2.70147	2.20602	3.14e-05	0.0190626	NA	NA	NA	NA	NA	NA	NA
comp222307_c0_seq1	len=356	3.22172	1.12074	3.44e-05	0.0206524	NA	NA	NA	NA	NA	NA	NA
comp177717_c0_seq1	len=370	6.33859	1.02252	3.81e-05	0.0226367	NA	NA	NA	NA	NA	NA	NA
comp258692_c0_seq1	len=364	6.05061	0.240024	3.85e-05	0.0226734	NA	NA	NA	NA	NA	NA	NA
comp156384_c0_seq1	len=218	3.84663	1.39837	4.71e-05	0.0274178	NA	NA	NA	NA	NA	NA	NA
comp422344_c0_seq1	len=417	3.46292	0.0733302	4.76e-05	0.0274178	NA	NA	NA	NA	NA	NA	NA
comp259321_c11_seq1	len=257	2.70848	0.910549	4.83e-05	0.0275185	NA	NA	NA	NA	NA	NA	NA
comp251808_c2_seq4	len=860	-3.37385	0.34867	5.41e-05	0.0305252	NA	NA	NA	NA	NA	NA	NA
comp214600_c1_seq1	len=510	-2.9363	0.855176	6.03e-05	0.0336815	NA	NA	NA	NA	NA	NA	NA
comp255110_c0_seq2	len=337	1.68684	1.84209	0.00728784	0.868601	NA	NA	NA	NA	NA	NA	NA
comp262326_c2_seq1	len=277	2.15451	2.69759	0.00730234	0.868601	NA	NA	NA	NA	NA	NA	NA
comp298755_c0_seq1	len=1106	3.97936	3.4878	6.98e-05	0.0378613	NA	NA	NA	NA	NA	NA	NA
comp261285_c7_seq1	len=1290	2.59834	4.00542	7.75e-05	0.0416396	NA	NA	NA	NA	NA	NA	NA
comp204360_c0_seq1	len=669	-2.38044	1.18088	8.08e-05	0.0429578	NA	NA	NA	NA	NA	NA	NA
comp255272_c2_seq2	len=1059	-1.6674	0.708006	0.00746486	0.878171	NA	NA	NA	NA	NA	NA	NA
comp260213_c1_seq1	len=449	4.04803	2.91403	8.36e-05	0.0436299	NA	NA	NA	NA	NA	NA	NA
comp217467_c0_seq1	len=258	-1.21806	1.62905	0.0200458	1	NA	NA	NA	NA	NA	NA	NA
comp246829_c1_seq3	len=470	-2.06707	0.600417	0.000107302	0.0549534	NA	NA	NA	NA	NA	NA	NA
comp250951_c0_seq1	len=578	3.64828	2.03768	0.000110415	0.0560288	NA	NA	NA	NA	NA	NA	NA
comp131485_c0_seq1	len=269	2.29554	0.128199	0.000117377	0.0590201	NA	NA	NA	NA	NA	NA	NA
comp149622_c0_seq1	len=316	3.23883	1.55097	0.00769103	0.894709	NA	NA	NA	NA	NA	NA	NA
comp246987_c0_seq2	len=516	2.21058	0.509714	0.000121564	0.0600339	NA	NA	NA	NA	NA	NA	NA
comp212467_c0_seq1	len=1152	1.99048	2.62848	0.00775819	0.894709	NA	NA	NA	NA	NA	NA	NA
comp168145_c0_seq1	len=244	2.18184	2.42607	0.000130153	0.0631481	NA	NA	NA	NA	NA	NA	NA
comp182581_c0_seq1	len=363	-1.89958	0.267843	0.00013536	0.0651034	NA	NA	NA	NA	NA	NA	NA
comp142608_c0_seq1	len=210	-2.02416	0.289329	0.00777522	0.894709	NA	NA	NA	NA	NA	NA	NA
comp259695_c1_seq1	len=1683	5.74893	1.45724	0.000143432	0.0672977	NA	NA	NA	NA	NA	NA	NA
comp180545_c0_seq1	len=315	1.36386	0.863123	0.0203319	1	NA	NA	NA	NA	NA	NA	NA
comp257891_c0_seq1	len=1945	-2.77379	2.81055	0.000161636	0.0751282	NA	NA	NA	NA	NA	NA	NA
comp236412_c0_seq2	len=401	3.45966	0.669091	0.000171222	0.0789204	NA	NA	NA	NA	NA	NA	NA
comp205548_c2_seq1	len=420	2.55287	1.09078	0.000174682	0.0798499	NA	NA	NA	NA	NA	NA	NA
comp261557_c0_seq4	len=541	2.82599	1.67243	0.000179167	0.0812286	NA	NA	NA	NA	NA	NA	NA
comp255723_c0_seq1	len=206	2.518	1.05854	0.000189642	0.0846707	NA	NA	NA	NA	NA	NA	NA
comp293283_c0_seq1	len=234	4.65145	0.924753	0.00018982	0.0846707	NA	NA	NA	NA	NA	NA	NA
comp245632_c0_seq2	len=785	-2.47156	0.053113	0.000191691	0.0848208	NA	NA	NA	NA	NA	NA	NA
comp244127_c0_seq2	len=533	2.0431	2.0225	0.000193766	0.0850585	NA	NA	NA	NA	NA	NA	NA
comp243136_c2_seq1	len=438	2.8919	0.640041	0.000196102	0.0854064	NA	NA	NA	NA	NA	NA	NA
comp185995_c0_seq1	len=354	2.08459	0.673969	0.000199922	0.0863898	NA	NA	NA	NA	NA	NA	NA
comp226898_c1_seq1	len=287	3.36239	0.490241	0.000202226	0.0867078	NA	NA	NA	NA	NA	NA	NA
comp260310_c0_seq1	len=619	3.11344	1.26576	0.000208039	0.0885143	NA	NA	NA	NA	NA	NA	NA
comp255783_c1_seq2	len=550	-3.11847	1.1363	0.000209932	0.0886378	NA	NA	NA	NA	NA	NA	NA
comp197966_c0_seq2	len=427	-2.56539	-0.104802	0.000213549	0.0894818	NA	NA	NA	NA	NA	NA	NA
comp261341_c0_seq2	len=3231	2.70719	0.53286	0.00022487	0.0935173	NA	NA	NA	NA	NA	NA	NA
comp262577_c0_seq4	len=6438	-2.56637	1.97892	0.000233416	0.0963468	NA	NA	NA	NA	NA	NA	NA
comp167809_c0_seq1	len=280	-1.36675	1.40595	0.00841669	0.932937	NA	NA	NA	NA	NA	NA	NA
comp246442_c0_seq1	len=455	1.17938	0.45375	0.0211524	1	NA	NA	NA	NA	NA	NA	NA
comp244986_c0_seq1	len=1008	6.17765	1.52091	0.000239808	0.0968175	NA	NA	NA	NA	NA	NA	NA
comp244772_c0_seq1	len=238	-3.04699	0.399827	0.000250377	0.100352	NA	NA	NA	NA	NA	NA	NA
comp261173_c1_seq1	len=310	2.68324	1.65465	0.000254457	0.101254	NA	NA	NA	NA	NA	NA	NA
comp230749_c2_seq1	len=353	2.56538	0.690796	0.000259619	0.10257	NA	NA	NA	NA	NA	NA	NA
comp261181_c3_seq7	len=394	-1.75053	1.16147	0.000265476	0.10414	NA	NA	NA	NA	NA	NA	NA
comp192663_c0_seq1	len=528	2.82653	5.24573	0.000284616	0.110862	NA	NA	NA	NA	NA	NA	NA
comp261877_c3_seq1	len=316	2.07286	0.394715	0.000291588	0.112783	NA	NA	NA	NA	NA	NA	NA
comp261364_c2_seq7	len=524	-3.60439	0.225235	0.000294954	0.113023	NA	NA	NA	NA	NA	NA	NA
comp232966_c0_seq2	len=732	-3.07093	1.05943	0.000296295	0.113023	NA	NA	NA	NA	NA	NA	NA
comp195320_c0_seq1	len=302	2.5842	0.868219	0.000314269	0.119058	NA	NA	NA	NA	NA	NA	NA
comp200673_c0_seq1	len=318	-2.12214	0.217231	0.000323383	0.121678	NA	NA	NA	NA	NA	NA	NA
comp238962_c0_seq1	len=541	1.89422	3.12585	0.000358092	0.133827	NA	NA	NA	NA	NA	NA	NA
comp255980_c0_seq3	len=437	-2.19849	1.85571	0.000361598	0.13423	NA	NA	NA	NA	NA	NA	NA
comp143832_c0_seq1	len=328	-1.2265	1.04595	0.0215531	1	NA	NA	NA	NA	NA	NA	NA
comp246045_c0_seq1	len=262	-2.32937	1.2022	0.000378171	0.138523	NA	NA	NA	NA	NA	NA	NA
comp240337_c1_seq2	len=341	2.20727	0.32196	0.000411297	0.149666	NA	NA	NA	NA	NA	NA	NA
comp217795_c1_seq1	len=306	-2.00701	-0.0328105	0.000420454	0.150783	NA	NA	NA	NA	NA	NA	NA
comp238979_c0_seq1	len=1226	2.66079	2.53057	0.000421502	0.150783	NA	NA	NA	NA	NA	NA	NA
comp252692_c0_seq1	len=537	-1.89964	1.97175	0.000422543	0.150783	NA	NA	NA	NA	NA	NA	NA
comp243597_c0_seq1	len=456	1.84537	1.63565	0.000428086	0.150992	NA	NA	NA	NA	NA	NA	NA
comp237347_c0_seq1	len=771	1.87244	3.73198	0.00042975	0.150992	NA	NA	NA	NA	NA	NA	NA
comp168201_c0_seq1	len=300	2.53054	1.14729	0.00043132	0.150992	NA	NA	NA	NA	NA	NA	NA
comp227911_c0_seq1	len=398	5.92047	-0.0048833	0.000441845	0.153438	NA	NA	NA	NA	NA	NA	NA
comp241145_c0_seq1	len=453	-1.90934	0.981013	0.000443855	0.153438	NA	NA	NA	NA	NA	NA	NA
comp247677_c0_seq2	len=635	1.79877	2.14563	0.00909106	0.957782	NA	NA	NA	NA	NA	NA	NA
comp249482_c3_seq1	len=645	2.52417	2.03347	0.000457436	0.156181	NA	NA	NA	NA	NA	NA	NA
comp261914_c0_seq1	len=227	-2.78378	0.60766	0.00047407	0.160846	NA	NA	NA	NA	NA	NA	NA
comp259488_c0_seq4	len=438	-1.29731	0.206933	0.00927628	0.971743	NA	NA	NA	NA	NA	NA	NA
comp259728_c0_seq2	len=1249	-3.02553	-0.049678	0.00048041	0.160846	NA	NA	NA	NA	NA	NA	NA
comp254032_c1_seq2	len=700	-1.85933	1.84592	0.000482732	0.160846	NA	NA	NA	NA	NA	NA	NA
comp217511_c0_seq1	len=453	2.11368	1.59409	0.000486647	0.161179	NA	NA	NA	NA	NA	NA	NA
comp240122_c0_seq1	len=342	2.38371	1.01092	0.00049038	0.161449	NA	NA	NA	NA	NA	NA	NA
comp259138_c0_seq2	len=1968	2.06454	0.965056	0.000501316	0.164073	NA	NA	NA	NA	NA	NA	NA
comp141768_c0_seq1	len=229	3.18194	1.48282	0.000528347	0.171698	NA	NA	NA	NA	NA	NA	NA
comp232618_c1_seq1	len=457	1.75273	0.890346	0.00951617	0.98383	NA	NA	NA	NA	NA	NA	NA
comp260023_c1_seq1	len=1704	1.86519	4.27772	0.000541739	0.17421	NA	NA	NA	NA	NA	NA	NA
comp256939_c5_seq1	len=245	-1.42031	1.20055	0.00956045	0.984726	NA	NA	NA	NA	NA	NA	NA
comp253165_c0_seq1	len=979	2.87668	0.739285	0.000557639	0.177262	NA	NA	NA	NA	NA	NA	NA
comp185193_c0_seq1	len=499	1.35513	0.334669	0.00960927	0.986082	NA	NA	NA	NA	NA	NA	NA
comp258968_c1_seq11	len=321	1.41112	2.81608	0.00966532	0.989997	NA	NA	NA	NA	NA	NA	NA
comp261670_c0_seq6	len=1222	2.51447	5.16574	0.000583929	0.182473	NA	NA	NA	NA	NA	NA	NA
comp241087_c0_seq2	len=1095	-2.62144	1.06335	0.000588542	0.182881	NA	NA	NA	NA	NA	NA	NA
comp228553_c0_seq1	len=501	-1.52431	1.70816	0.00979052	0.99149	NA	NA	NA	NA	NA	NA	NA
comp232984_c0_seq1	len=330	2.71784	0.661574	0.000611397	0.187872	NA	NA	NA	NA	NA	NA	NA
comp243085_c2_seq1	len=730	1.14851	2.98182	0.0370376	1	NA	NA	NA	NA	NA	NA	NA
comp251947_c0_seq2	len=988	4.25766	4.41406	0.000634305	0.19277	NA	NA	NA	NA	NA	NA	NA
comp211052_c0_seq1	len=248	-1.34846	0.0581518	0.00984193	0.99149	NA	NA	NA	NA	NA	NA	NA
comp251837_c0_seq1	len=486	2.10232	1.07347	0.000665963	0.200191	NA	NA	NA	NA	NA	NA	NA
comp318765_c0_seq1	len=233	2.4904	1.15117	0.000705664	0.210978	NA	NA	NA	NA	NA	NA	NA
comp258921_c0_seq5	len=376	2.9864	1.14221	0.000713693	0.212232	NA	NA	NA	NA	NA	NA	NA
comp252692_c1_seq1	len=1726	-1.82523	3.82868	0.000722337	0.213653	NA	NA	NA	NA	NA	NA	NA
comp247924_c0_seq1	len=379	2.27778	0.34598	0.000728025	0.21419	NA	NA	NA	NA	NA	NA	NA
comp255406_c0_seq1	len=596	3.4693	1.90136	0.000732536	0.214377	NA	NA	NA	NA	NA	NA	NA
comp189287_c0_seq1	len=271	3.11947	-0.105948	0.000740084	0.215446	NA	NA	NA	NA	NA	NA	NA
comp243575_c0_seq4	len=345	2.24699	0.394077	0.000776793	0.224949	NA	NA	NA	NA	NA	NA	NA
comp259695_c1_seq4	len=858	5.57372	0.132998	0.000801813	0.230985	NA	NA	NA	NA	NA	NA	NA
comp259630_c0_seq2	len=583	2.73901	1.26454	0.000810625	0.23109	NA	NA	NA	NA	NA	NA	NA
comp237304_c0_seq1	len=212	-2.317	2.37471	0.000811044	0.23109	NA	NA	NA	NA	NA	NA	NA
comp236647_c0_seq1	len=444	1.83336	0.791384	0.000815684	0.23109	NA	NA	NA	NA	NA	NA	NA
comp355525_c0_seq1	len=333	-1.44821	0.881459	0.0100592	0.99149	NA	NA	NA	NA	NA	NA	NA
comp255704_c6_seq1	len=286	-1.56533	0.529524	0.000823069	0.23109	NA	NA	NA	NA	NA	NA	NA
comp214164_c0_seq1	len=655	-1.72433	1.41225	0.000827714	0.231221	NA	NA	NA	NA	NA	NA	NA
comp239655_c0_seq1	len=558	-2.62273	1.14997	0.000847455	0.235546	NA	NA	NA	NA	NA	NA	NA
comp219319_c0_seq1	len=323	-1.5429	0.0787419	0.0103089	1	NA	NA	NA	NA	NA	NA	NA
comp155653_c0_seq1	len=248	1.26916	0.991702	0.0234415	1	NA	NA	NA	NA	NA	NA	NA
comp238572_c1_seq1	len=860	-1.30892	1.05285	0.0103176	1	NA	NA	NA	NA	NA	NA	NA
comp261957_c3_seq1	len=1176	-2.5065	0.333332	0.000951404	0.258027	NA	NA	NA	NA	NA	NA	NA
comp198657_c0_seq1	len=223	3.03685	1.00517	0.000951665	0.258027	NA	NA	NA	NA	NA	NA	NA
comp258886_c0_seq1	len=2155	2.0363	1.85181	0.00097485	0.263024	NA	NA	NA	NA	NA	NA	NA
comp231241_c0_seq1	len=264	2.15564	0.954939	0.000980324	0.263217	NA	NA	NA	NA	NA	NA	NA
comp199678_c0_seq1	len=784	2.34461	1.35003	0.0383821	1	NA	NA	NA	NA	NA	NA	NA
comp246637_c0_seq1	len=507	-2.04256	0.95652	0.00104016	0.276597	NA	NA	NA	NA	NA	NA	NA
comp256954_c7_seq1	len=649	1.35836	2.14773	0.0105277	1	NA	NA	NA	NA	NA	NA	NA
comp248360_c0_seq1	len=403	1.72981	2.3938	0.00105535	0.277408	NA	NA	NA	NA	NA	NA	NA
comp249482_c2_seq1	len=1158	2.41749	2.63566	0.00105825	0.277408	NA	NA	NA	NA	NA	NA	NA
comp241291_c0_seq2	len=582	2.01278	0.767856	0.00108951	0.284255	NA	NA	NA	NA	NA	NA	NA
comp249109_c0_seq2	len=891	-2.0348	1.64434	0.00109639	0.284598	NA	NA	NA	NA	NA	NA	NA
comp142194_c0_seq1	len=207	1.36297	0.618364	0.0107491	1	NA	NA	NA	NA	NA	NA	NA
comp138459_c0_seq1	len=204	2.22898	1.82482	0.00111553	0.286983	NA	NA	NA	NA	NA	NA	NA
comp253376_c0_seq1	len=272	1.62146	1.22287	0.00113251	0.290002	NA	NA	NA	NA	NA	NA	NA
comp320543_c0_seq1	len=225	-2.76065	1.57501	0.00114414	0.291629	NA	NA	NA	NA	NA	NA	NA
comp259541_c0_seq17	len=548	-2.43668	1.84902	0.00118428	0.300477	NA	NA	NA	NA	NA	NA	NA
comp231121_c0_seq2	len=255	-2.02251	0.171645	0.00119707	0.302335	NA	NA	NA	NA	NA	NA	NA
comp258765_c2_seq9	len=364	-1.50766	1.34249	0.00123769	0.310069	NA	NA	NA	NA	NA	NA	NA
comp166823_c0_seq1	len=653	3.28025	0.958748	0.00123891	0.310069	NA	NA	NA	NA	NA	NA	NA
comp236958_c0_seq1	len=260	1.11337	0.459729	0.024343	1	NA	NA	NA	NA	NA	NA	NA
comp243282_c0_seq2	len=603	-2.05677	0.525784	0.00126595	0.313996	NA	NA	NA	NA	NA	NA	NA
comp346412_c0_seq1	len=266	-2.68492	0.646396	0.00128175	0.316495	NA	NA	NA	NA	NA	NA	NA
comp258311_c0_seq1	len=279	1.82917	0.677591	0.00131176	0.322467	NA	NA	NA	NA	NA	NA	NA
comp242208_c0_seq1	len=679	-1.62282	1.22149	0.0112188	1	NA	NA	NA	NA	NA	NA	NA
comp260129_c0_seq7	len=473	-2.34345	2.18478	0.0112231	1	NA	NA	NA	NA	NA	NA	NA
comp259577_c1_seq1	len=292	-2.27931	0.397364	0.00134363	0.325955	NA	NA	NA	NA	NA	NA	NA
comp219718_c0_seq1	len=550	3.43513	0.623864	0.00138162	0.333707	NA	NA	NA	NA	NA	NA	NA
comp183459_c1_seq1	len=476	2.19248	0.768025	0.00140599	0.338117	NA	NA	NA	NA	NA	NA	NA
comp137845_c0_seq1	len=384	1.76472	0.988154	0.0014209	0.340223	NA	NA	NA	NA	NA	NA	NA
comp240960_c0_seq1	len=683	2.07442	1.00736	0.00142751	0.340331	NA	NA	NA	NA	NA	NA	NA
comp453121_c0_seq1	len=335	2.38105	0.35416	0.00143893	0.341581	NA	NA	NA	NA	NA	NA	NA
comp255979_c1_seq1	len=243	2.0766	0.195728	0.00146031	0.345175	NA	NA	NA	NA	NA	NA	NA
comp180037_c0_seq1	len=531	-1.64409	2.14742	0.0115467	1	NA	NA	NA	NA	NA	NA	NA
comp254152_c1_seq16	len=2877	-2.59542	4.5413	0.00147722	0.346215	NA	NA	NA	NA	NA	NA	NA
comp255072_c0_seq3	len=399	-1.53719	2.01385	0.0115599	1	NA	NA	NA	NA	NA	NA	NA
comp286297_c0_seq1	len=267	3.98071	1.42228	0.00155929	0.362377	NA	NA	NA	NA	NA	NA	NA
comp261860_c1_seq1	len=298	1.50377	0.566202	0.00157613	0.364759	NA	NA	NA	NA	NA	NA	NA
comp259321_c1_seq3	len=626	1.75038	1.17404	0.00159041	0.366529	NA	NA	NA	NA	NA	NA	NA
comp218614_c0_seq1	len=248	1.94237	0.343765	0.00161368	0.368998	NA	NA	NA	NA	NA	NA	NA
comp238227_c0_seq1	len=575	2.29369	1.80519	0.0116385	1	NA	NA	NA	NA	NA	NA	NA
comp241779_c0_seq1	len=342	-1.33301	1.40842	0.0251839	1	NA	NA	NA	NA	NA	NA	NA
comp144971_c0_seq1	len=293	2.30016	2.35582	0.00163728	0.368998	NA	NA	NA	NA	NA	NA	NA
comp255824_c6_seq1	len=1267	-3.01058	2.76038	0.00164264	0.368998	NA	NA	NA	NA	NA	NA	NA
comp166600_c0_seq1	len=399	2.00626	0.778463	0.00165323	0.368998	NA	NA	NA	NA	NA	NA	NA
comp257625_c4_seq1	len=293	1.87718	1.23768	0.00165851	0.368998	NA	NA	NA	NA	NA	NA	NA
comp258618_c0_seq8	len=1000	1.81405	1.40364	0.00166641	0.368998	NA	NA	NA	NA	NA	NA	NA
comp257648_c0_seq1	len=2735	-2.24021	3.17805	0.0117162	1	NA	NA	NA	NA	NA	NA	NA
comp176315_c0_seq1	len=203	1.01227	0.620127	0.0403032	1	NA	NA	NA	NA	NA	NA	NA
comp259676_c0_seq2	len=704	2.34491	2.06828	0.00168059	0.368998	NA	NA	NA	NA	NA	NA	NA
comp257480_c1_seq1	len=308	1.1459	0.849976	0.0118938	1	NA	NA	NA	NA	NA	NA	NA
comp255900_c0_seq2	len=1676	-1.63806	0.173968	0.00168785	0.368998	NA	NA	NA	NA	NA	NA	NA
comp226369_c0_seq1	len=204	1.63544	1.46351	0.00172791	0.37627	NA	NA	NA	NA	NA	NA	NA
comp274515_c0_seq1	len=771	2.78493	3.85678	0.00178515	0.38721	NA	NA	NA	NA	NA	NA	NA
comp218026_c0_seq1	len=221	-1.79728	0.560219	0.00180631	0.389601	NA	NA	NA	NA	NA	NA	NA
comp236887_c0_seq1	len=1518	2.76672	2.43791	0.00181026	0.389601	NA	NA	NA	NA	NA	NA	NA
comp176136_c0_seq1	len=336	1.46877	1.57844	0.0120889	1	NA	NA	NA	NA	NA	NA	NA
comp240930_c3_seq1	len=208	2.01792	1.49245	0.00184902	0.394173	NA	NA	NA	NA	NA	NA	NA
comp249147_c0_seq2	len=594	-2.277	0.269103	0.00185288	0.394173	NA	NA	NA	NA	NA	NA	NA
comp233968_c0_seq1	len=399	-1.47745	0.354544	0.00186445	0.395114	NA	NA	NA	NA	NA	NA	NA
comp199255_c0_seq1	len=339	1.53218	0.947847	0.0123391	1	NA	NA	NA	NA	NA	NA	NA
comp244127_c0_seq1	len=286	1.89072	2.21762	0.00191648	0.402905	NA	NA	NA	NA	NA	NA	NA
comp254982_c1_seq1	len=239	-1.62052	0.150162	0.00192307	0.402905	NA	NA	NA	NA	NA	NA	NA
comp180655_c1_seq1	len=350	3.78634	2.02418	0.00194563	0.405836	NA	NA	NA	NA	NA	NA	NA
comp249572_c0_seq2	len=350	-2.36004	0.384078	0.00195737	0.405836	NA	NA	NA	NA	NA	NA	NA
comp220227_c0_seq1	len=235	2.26497	0.397792	0.00195907	0.405836	NA	NA	NA	NA	NA	NA	NA
comp234699_c0_seq1	len=843	3.23061	2.57029	0.00198547	0.408272	NA	NA	NA	NA	NA	NA	NA
comp135894_c0_seq1	len=443	-2.05369	0.142089	0.00198559	0.408272	NA	NA	NA	NA	NA	NA	NA
comp230685_c0_seq1	len=300	1.97818	0.487137	0.00203317	0.416507	NA	NA	NA	NA	NA	NA	NA
comp137579_c0_seq1	len=394	-1.77114	0.524699	0.00210504	0.429638	NA	NA	NA	NA	NA	NA	NA
comp259483_c1_seq1	len=411	1.79578	0.704134	0.00215546	0.438311	NA	NA	NA	NA	NA	NA	NA
comp259832_c1_seq1	len=745	2.2516	2.28977	0.00218423	0.442534	NA	NA	NA	NA	NA	NA	NA
comp362428_c0_seq1	len=231	-1.66348	1.07107	0.00224515	0.453216	NA	NA	NA	NA	NA	NA	NA
comp147715_c0_seq1	len=354	-2.29367	1.65108	0.00230024	0.461777	NA	NA	NA	NA	NA	NA	NA
comp252404_c0_seq6	len=444	-3.18446	1.72174	0.00230425	0.461777	NA	NA	NA	NA	NA	NA	NA
comp205548_c0_seq1	len=739	2.288	1.75638	0.00231377	0.462011	NA	NA	NA	NA	NA	NA	NA
comp166524_c0_seq1	len=402	2.33619	2.61636	0.00232675	0.462932	NA	NA	NA	NA	NA	NA	NA
comp169322_c0_seq1	len=256	1.80045	2.38193	0.00234255	0.464404	NA	NA	NA	NA	NA	NA	NA
comp245686_c0_seq2	len=2352	3.19891	2.70453	0.00235783	0.465763	NA	NA	NA	NA	NA	NA	NA
comp216656_c0_seq1	len=1872	-2.43039	3.12378	0.00236662	0.465837	NA	NA	NA	NA	NA	NA	NA
comp216843_c0_seq1	len=511	1.82297	3.53754	0.00239941	0.470617	NA	NA	NA	NA	NA	NA	NA
comp236043_c0_seq1	len=339	1.78039	1.7282	0.00241985	0.47174	NA	NA	NA	NA	NA	NA	NA
comp237844_c0_seq2	len=653	-1.78668	0.7314	0.00242238	0.47174	NA	NA	NA	NA	NA	NA	NA
comp236867_c0_seq2	len=378	2.53473	0.0889036	0.00243072	0.47174	NA	NA	NA	NA	NA	NA	NA
comp247542_c0_seq1	len=472	-1.70406	3.20617	0.00243931	0.471751	NA	NA	NA	NA	NA	NA	NA
comp250821_c0_seq3	len=409	-1.69946	0.0941198	0.0131891	1	NA	NA	NA	NA	NA	NA	NA
comp220422_c0_seq1	len=236	-1.14684	1.07396	0.0131956	1	NA	NA	NA	NA	NA	NA	NA
comp221260_c0_seq1	len=257	1.54536	0.441547	0.0132564	1	NA	NA	NA	NA	NA	NA	NA
comp246128_c0_seq1	len=364	-1.27759	2.0595	0.0133011	1	NA	NA	NA	NA	NA	NA	NA
comp175613_c0_seq1	len=203	-1.60318	2.91814	0.00259274	0.492807	NA	NA	NA	NA	NA	NA	NA
comp216854_c0_seq1	len=322	-2.04763	2.98257	0.00262237	0.496733	NA	NA	NA	NA	NA	NA	NA
comp245049_c1_seq1	len=247	1.52099	0.220697	0.013374	1	NA	NA	NA	NA	NA	NA	NA
comp232545_c0_seq1	len=676	2.60756	2.4696	0.0133979	1	NA	NA	NA	NA	NA	NA	NA
comp158361_c0_seq1	len=255	2.30574	1.35356	0.00274903	0.514717	NA	NA	NA	NA	NA	NA	NA
comp262201_c0_seq5	len=203	2.74089	2.53273	0.00275454	0.514717	NA	NA	NA	NA	NA	NA	NA
comp204634_c0_seq1	len=316	-2.8947	0.845503	0.00278037	0.517794	NA	NA	NA	NA	NA	NA	NA
comp252780_c0_seq1	len=224	1.68585	0.82578	0.00279609	0.518975	NA	NA	NA	NA	NA	NA	NA
comp226442_c0_seq1	len=332	1.99411	0.144638	0.00281152	0.520093	NA	NA	NA	NA	NA	NA	NA
comp254123_c0_seq1	len=347	1.66436	1.39803	0.0137172	1	NA	NA	NA	NA	NA	NA	NA
comp258385_c0_seq3	len=227	-1.57034	0.351128	0.00284767	0.521474	NA	NA	NA	NA	NA	NA	NA
comp231212_c0_seq1	len=422	1.8898	2.38079	0.00284981	0.521474	NA	NA	NA	NA	NA	NA	NA
comp253457_c1_seq1	len=229	-1.54201	0.351729	0.0028567	0.521474	NA	NA	NA	NA	NA	NA	NA
comp221111_c1_seq1	len=270	-1.23123	0.601299	0.0139917	1	NA	NA	NA	NA	NA	NA	NA
comp328153_c0_seq1	len=334	2.34352	1.49631	0.00290809	0.527374	NA	NA	NA	NA	NA	NA	NA
comp234358_c0_seq1	len=249	1.97291	0.393437	0.00294622	0.532544	NA	NA	NA	NA	NA	NA	NA
comp240438_c0_seq1	len=959	-1.51184	3.17559	0.0029765	0.535858	NA	NA	NA	NA	NA	NA	NA
comp204651_c0_seq1	len=225	1.31536	1.22683	0.0140678	1	NA	NA	NA	NA	NA	NA	NA
comp138978_c0_seq1	len=234	2.25897	-0.0198756	0.00299362	0.535858	NA	NA	NA	NA	NA	NA	NA
comp262026_c2_seq16	len=511	2.01391	2.71688	0.00305293	0.544712	NA	NA	NA	NA	NA	NA	NA
comp260769_c1_seq4	len=744	1.45207	1.7995	0.00312748	0.554835	NA	NA	NA	NA	NA	NA	NA
comp160478_c0_seq1	len=1102	1.59851	2.90788	0.00312973	0.554835	NA	NA	NA	NA	NA	NA	NA
comp131679_c0_seq1	len=266	-1.22875	0.477801	0.0141854	1	NA	NA	NA	NA	NA	NA	NA
comp242215_c0_seq3	len=391	1.59781	2.17542	0.00317021	0.558263	NA	NA	NA	NA	NA	NA	NA
comp239127_c0_seq1	len=207	-1.48708	2.58417	0.00318673	0.558263	NA	NA	NA	NA	NA	NA	NA
comp181102_c0_seq1	len=264	2.93373	1.15254	0.00319586	0.558263	NA	NA	NA	NA	NA	NA	NA
comp256457_c1_seq1	len=427	-2.13257	1.3111	0.0143029	1	NA	NA	NA	NA	NA	NA	NA
comp260799_c3_seq1	len=253	-2.1329	1.40228	0.00323874	0.563327	NA	NA	NA	NA	NA	NA	NA
comp246830_c3_seq1	len=450	-1.51251	2.22093	0.00325125	0.563731	NA	NA	NA	NA	NA	NA	NA
comp259983_c2_seq15	len=1195	1.27408	1.0049	0.0144651	1	NA	NA	NA	NA	NA	NA	NA
comp244965_c1_seq1	len=1455	1.35495	1.72378	0.0144834	1	NA	NA	NA	NA	NA	NA	NA
comp178224_c0_seq1	len=656	-1.4059	3.19083	0.00333608	0.573049	NA	NA	NA	NA	NA	NA	NA
comp230079_c1_seq1	len=211	1.54428	0.282888	0.00338819	0.578598	NA	NA	NA	NA	NA	NA	NA
comp239471_c0_seq1	len=614	-0.996313	3.9538	0.0286153	1	NA	NA	NA	NA	NA	NA	NA
comp187133_c0_seq1	len=414	-1.18465	0.154226	0.0145792	1	NA	NA	NA	NA	NA	NA	NA
comp233121_c2_seq1	len=257	-1.1894	0.0853904	0.014593	1	NA	NA	NA	NA	NA	NA	NA
comp171192_c0_seq1	len=235	1.45106	0.709759	0.00352253	0.595825	NA	NA	NA	NA	NA	NA	NA
comp250997_c0_seq3	len=303	-1.71439	1.82972	0.00353646	0.596358	NA	NA	NA	NA	NA	NA	NA
comp452985_c0_seq1	len=273	-2.21162	0.179917	0.00359769	0.604838	NA	NA	NA	NA	NA	NA	NA
comp247589_c2_seq1	len=253	-2.15804	-0.62756	0.00365766	0.613057	NA	NA	NA	NA	NA	NA	NA
comp253905_c9_seq1	len=263	1.47014	0.650287	0.00368524	0.614975	NA	NA	NA	NA	NA	NA	NA
comp177817_c0_seq1	len=334	2.057	1.65612	0.00369231	0.614975	NA	NA	NA	NA	NA	NA	NA
comp505122_c0_seq1	len=255	2.06966	0.0703439	0.00370246	0.614975	NA	NA	NA	NA	NA	NA	NA
comp398184_c0_seq1	len=313	-1.14372	0.705505	0.0149606	1	NA	NA	NA	NA	NA	NA	NA
comp260752_c2_seq1	len=808	-1.4134	2.98781	0.00373243	0.616252	NA	NA	NA	NA	NA	NA	NA
comp248703_c0_seq1	len=700	1.5764	1.33026	0.00375561	0.618235	NA	NA	NA	NA	NA	NA	NA
comp237949_c0_seq2	len=288	1.4499	0.274984	0.00381944	0.62527	NA	NA	NA	NA	NA	NA	NA
comp225458_c0_seq1	len=417	1.45119	2.48674	0.00382096	0.62527	NA	NA	NA	NA	NA	NA	NA
comp248208_c0_seq1	len=971	-1.87905	1.80003	0.0038623	0.629148	NA	NA	NA	NA	NA	NA	NA
comp201313_c0_seq1	len=322	1.36296	0.460661	0.0151235	1	NA	NA	NA	NA	NA	NA	NA
comp256979_c0_seq2	len=1856	-2.03815	4.14163	0.00391275	0.633069	NA	NA	NA	NA	NA	NA	NA
comp259251_c0_seq3	len=292	1.68904	1.15478	0.0151923	1	NA	NA	NA	NA	NA	NA	NA
comp259330_c1_seq17	len=1065	-1.80819	2.89261	0.00394381	0.633069	NA	NA	NA	NA	NA	NA	NA
comp242377_c0_seq1	len=746	-1.26523	1.27906	0.0152939	1	NA	NA	NA	NA	NA	NA	NA
comp254870_c0_seq1	len=518	2.00922	0.924221	0.00395079	0.633069	NA	NA	NA	NA	NA	NA	NA
comp175991_c0_seq1	len=215	1.21837	1.1347	0.0153193	1	NA	NA	NA	NA	NA	NA	NA
comp259368_c1_seq4	len=681	-1.88222	1.3372	0.00397634	0.633819	NA	NA	NA	NA	NA	NA	NA
comp259296_c0_seq4	len=501	-1.78235	3.52524	0.0154033	1	NA	NA	NA	NA	NA	NA	NA
comp362353_c0_seq1	len=321	2.60502	0.99554	0.00400588	0.634869	NA	NA	NA	NA	NA	NA	NA
comp277610_c0_seq1	len=250	-2.33942	2.72227	0.00402523	0.634936	NA	NA	NA	NA	NA	NA	NA
comp217603_c0_seq1	len=520	1.63885	3.13521	0.00403424	0.634936	NA	NA	NA	NA	NA	NA	NA
comp245359_c0_seq1	len=381	2.04769	1.18472	0.00404074	0.634936	NA	NA	NA	NA	NA	NA	NA
comp215436_c0_seq1	len=508	-1.20502	3.52019	0.0158124	1	NA	NA	NA	NA	NA	NA	NA
comp239168_c0_seq1	len=393	-1.5939	1.99729	0.00409762	0.638469	NA	NA	NA	NA	NA	NA	NA
comp218645_c0_seq1	len=235	1.71889	0.587788	0.00410523	0.638469	NA	NA	NA	NA	NA	NA	NA
comp256755_c0_seq1	len=210	1.67689	1.12051	0.0041094	0.638469	NA	NA	NA	NA	NA	NA	NA
comp217685_c0_seq1	len=354	1.37249	2.40904	0.029819	1	NA	NA	NA	NA	NA	NA	NA
comp259701_c2_seq1	len=286	-1.52687	0.986419	0.015925	1	NA	NA	NA	NA	NA	NA	NA
comp246068_c0_seq1	len=532	1.94114	1.48684	0.00426143	0.656556	NA	NA	NA	NA	NA	NA	NA
comp254085_c0_seq1	len=471	-1.54571	-0.438884	0.00429179	0.659398	NA	NA	NA	NA	NA	NA	NA
comp169935_c0_seq1	len=539	1.94721	3.45076	0.00431297	0.660816	NA	NA	NA	NA	NA	NA	NA
comp261074_c7_seq2	len=1829	-2.40573	-0.272917	0.00438258	0.669627	NA	NA	NA	NA	NA	NA	NA
comp262061_c0_seq1	len=230	1.49767	0.0855517	0.00439908	0.670062	NA	NA	NA	NA	NA	NA	NA
comp236576_c0_seq1	len=350	1.54637	0.88139	0.00441894	0.670062	NA	NA	NA	NA	NA	NA	NA
comp330685_c0_seq1	len=497	2.26242	1.88903	0.00442177	0.670062	NA	NA	NA	NA	NA	NA	NA
comp248404_c0_seq1	len=581	-3.22751	4.58001	0.0162984	1	NA	NA	NA	NA	NA	NA	NA
comp261690_c1_seq10	len=223	-1.61397	0.998588	0.00807051	0.914729	NA	NA	NA	NA	NA	NA	NA
comp220822_c0_seq1	len=211	-1.72645	-0.110875	0.00465131	0.691885	NA	NA	NA	NA	NA	NA	NA
comp239725_c2_seq1	len=249	1.53699	0.907067	0.00465332	0.691885	NA	NA	NA	NA	NA	NA	NA
comp256087_c0_seq2	len=368	-1.48608	0.764161	0.00465394	0.691885	NA	NA	NA	NA	NA	NA	NA
comp138129_c0_seq1	len=360	1.27678	0.304411	0.0164647	1	NA	NA	NA	NA	NA	NA	NA
comp379072_c0_seq1	len=210	-1.62957	0.131372	0.00466412	0.691885	NA	NA	NA	NA	NA	NA	NA
comp260615_c0_seq1	len=525	-1.10546	1.31434	0.0165047	1	NA	NA	NA	NA	NA	NA	NA
comp245647_c0_seq1	len=374	1.04692	1.8711	0.0303188	1	NA	NA	NA	NA	NA	NA	NA
comp260752_c0_seq3	len=736	-1.26247	1.36284	0.01651	1	NA	NA	NA	NA	NA	NA	NA
comp206249_c0_seq1	len=325	-1.54853	0.0607819	0.00473553	0.695387	NA	NA	NA	NA	NA	NA	NA
comp182948_c0_seq1	len=463	2.15263	1.24892	0.00473976	0.695387	NA	NA	NA	NA	NA	NA	NA
comp256799_c1_seq3	len=851	-1.36315	0.845337	0.0304659	1	NA	NA	NA	NA	NA	NA	NA
comp261350_c1_seq15	len=349	-2.55466	0.343298	0.0167168	1	NA	NA	NA	NA	NA	NA	NA
comp367086_c0_seq1	len=457	2.77207	1.09001	0.00480745	0.699749	NA	NA	NA	NA	NA	NA	NA
comp237690_c0_seq1	len=389	1.83326	1.28048	0.00482607	0.700293	NA	NA	NA	NA	NA	NA	NA
comp221572_c0_seq1	len=359	-0.965799	0.879524	0.0306606	1	NA	NA	NA	NA	NA	NA	NA
comp584891_c0_seq1	len=451	1.91181	0.462089	0.00486526	0.700767	NA	NA	NA	NA	NA	NA	NA
comp159421_c0_seq1	len=644	1.26745	2.30311	0.0306939	1	NA	NA	NA	NA	NA	NA	NA
comp165691_c0_seq1	len=270	1.11227	1.38452	0.0169805	1	NA	NA	NA	NA	NA	NA	NA
comp242394_c0_seq2	len=405	-1.8342	-0.115306	0.00493483	0.707126	NA	NA	NA	NA	NA	NA	NA
comp260652_c0_seq1	len=3520	2.60084	0.418072	0.0049758	0.711153	NA	NA	NA	NA	NA	NA	NA
comp240482_c0_seq1	len=919	-1.84751	4.66645	0.00499151	0.71156	NA	NA	NA	NA	NA	NA	NA
comp254565_c0_seq2	len=458	-1.57217	1.65683	0.0171307	1	NA	NA	NA	NA	NA	NA	NA
comp238744_c0_seq1	len=444	-1.60986	1.64307	0.00504548	0.715566	NA	NA	NA	NA	NA	NA	NA
comp260554_c1_seq12	len=882	-1.07192	0.627303	0.0308011	1	NA	NA	NA	NA	NA	NA	NA
comp249482_c1_seq1	len=1013	1.83705	2.70174	0.0051196	0.722372	NA	NA	NA	NA	NA	NA	NA
comp250794_c0_seq1	len=379	1.45726	1.2798	0.00517209	0.727922	NA	NA	NA	NA	NA	NA	NA
comp323562_c0_seq1	len=232	2.2864	0.828616	0.00520995	0.73139	NA	NA	NA	NA	NA	NA	NA
comp255603_c1_seq1	len=981	-1.05202	2.60815	0.01732	1	NA	NA	NA	NA	NA	NA	NA
comp258425_c1_seq1	len=222	-2.03343	0.964265	0.00526726	0.735701	NA	NA	NA	NA	NA	NA	NA
comp179583_c0_seq1	len=273	1.06861	1.09149	0.0310029	1	NA	NA	NA	NA	NA	NA	NA
comp214707_c0_seq1	len=206	2.0553	0.393517	0.00531141	0.735751	NA	NA	NA	NA	NA	NA	NA
comp246984_c0_seq1	len=675	1.48221	3.04387	0.0175528	1	NA	NA	NA	NA	NA	NA	NA
comp223079_c0_seq1	len=642	1.33437	0.892191	0.0311875	1	NA	NA	NA	NA	NA	NA	NA
comp129639_c0_seq1	len=290	-1.38325	0.625801	0.0176156	1	NA	NA	NA	NA	NA	NA	NA
comp228550_c0_seq1	len=495	1.49619	-0.0290525	0.0312415	1	NA	NA	NA	NA	NA	NA	NA
comp225428_c1_seq1	len=329	-1.40285	1.30962	0.00536883	0.735751	NA	NA	NA	NA	NA	NA	NA
comp254518_c0_seq1	len=210	1.3009	0.87186	0.0177175	1	NA	NA	NA	NA	NA	NA	NA
comp230832_c0_seq1	len=691	2.4159	2.09824	0.00541068	0.738939	NA	NA	NA	NA	NA	NA	NA
comp137800_c0_seq1	len=261	-1.23456	0.446814	0.00926817	0.971743	NA	NA	NA	NA	NA	NA	NA
comp253718_c0_seq1	len=405	-1.61032	1.52255	0.00550225	0.747752	NA	NA	NA	NA	NA	NA	NA
comp234221_c0_seq1	len=344	3.00805	0.346345	0.00561953	0.761818	NA	NA	NA	NA	NA	NA	NA
comp259843_c3_seq3	len=304	1.10007	0.980731	0.0177859	1	NA	NA	NA	NA	NA	NA	NA
comp255164_c0_seq1	len=627	1.29505	1.57234	0.0178112	1	NA	NA	NA	NA	NA	NA	NA
comp218088_c0_seq1	len=531	1.31564	1.20765	0.0179317	1	NA	NA	NA	NA	NA	NA	NA
comp253762_c0_seq2	len=1634	1.4232	0.755967	0.00571955	0.767849	NA	NA	NA	NA	NA	NA	NA
comp222171_c1_seq1	len=222	-1.57674	0.936385	0.00576095	0.771535	NA	NA	NA	NA	NA	NA	NA
comp258238_c2_seq1	len=331	-1.51206	0.896047	0.00582852	0.777378	NA	NA	NA	NA	NA	NA	NA
comp228779_c1_seq1	len=262	-1.69878	0.309115	0.00585723	0.777378	NA	NA	NA	NA	NA	NA	NA
comp251361_c2_seq1	len=231	1.63797	0.690851	0.00585792	0.777378	NA	NA	NA	NA	NA	NA	NA
comp177606_c0_seq1	len=458	-2.31902	2.49288	0.0058608	0.777378	NA	NA	NA	NA	NA	NA	NA
comp262372_c0_seq5	len=259	-2.23669	1.52485	0.0320784	1	NA	NA	NA	NA	NA	NA	NA
comp261393_c5_seq1	len=568	-1.32057	0.555148	0.00590051	0.778909	NA	NA	NA	NA	NA	NA	NA
comp236493_c0_seq1	len=290	-2.66746	0.862399	0.0059517	0.783797	NA	NA	NA	NA	NA	NA	NA
comp259074_c0_seq7	len=251	-1.7616	1.0878	0.00597893	0.783852	NA	NA	NA	NA	NA	NA	NA
comp237594_c0_seq1	len=360	1.55323	1.79391	0.0184906	1	NA	NA	NA	NA	NA	NA	NA
comp212731_c0_seq1	len=331	-1.83654	0.312379	0.00599464	0.783852	NA	NA	NA	NA	NA	NA	NA
comp228058_c0_seq1	len=361	1.60144	0.471315	0.0185287	1	NA	NA	NA	NA	NA	NA	NA
comp260016_c3_seq1	len=510	2.22321	2.85539	0.0185947	1	NA	NA	NA	NA	NA	NA	NA
comp130908_c0_seq1	len=206	1.79635	-0.0392244	0.0186799	1	NA	NA	NA	NA	NA	NA	NA
comp234836_c1_seq1	len=711	2.06646	2.5861	0.00611012	0.788608	NA	NA	NA	NA	NA	NA	NA
comp251020_c1_seq1	len=1455	-2.43574	4.44191	0.00611126	0.788608	NA	NA	NA	NA	NA	NA	NA
comp242431_c0_seq1	len=846	-0.919246	3.41058	0.0323376	1	NA	NA	NA	NA	NA	NA	NA
comp259094_c0_seq3	len=418	-1.53972	0.273358	0.00613081	0.788608	NA	NA	NA	NA	NA	NA	NA
comp262330_c0_seq7	len=351	1.9717	1.22508	0.00617848	0.7897	NA	NA	NA	NA	NA	NA	NA
comp233765_c1_seq1	len=328	1.44743	0.845536	0.00618236	0.7897	NA	NA	NA	NA	NA	NA	NA
comp258336_c3_seq1	len=493	2.47085	1.844	0.00620138	0.7897	NA	NA	NA	NA	NA	NA	NA
comp258886_c1_seq4	len=1273	-2.28715	0.497954	0.0324965	1	NA	NA	NA	NA	NA	NA	NA
comp262525_c1_seq35	len=375	-1.91265	1.01115	0.018958	1	NA	NA	NA	NA	NA	NA	NA
comp260799_c4_seq3	len=516	-1.24342	2.46354	0.00629033	0.797992	NA	NA	NA	NA	NA	NA	NA
comp260554_c1_seq13	len=219	-1.23801	0.803532	0.0189885	1	NA	NA	NA	NA	NA	NA	NA
comp259321_c5_seq1	len=1150	2.184	3.32422	0.0190582	1	NA	NA	NA	NA	NA	NA	NA
comp251518_c2_seq2	len=304	-1.62161	1.20502	0.0190953	1	NA	NA	NA	NA	NA	NA	NA
comp134692_c0_seq1	len=257	2.43114	2.1988	0.00636719	0.800104	NA	NA	NA	NA	NA	NA	NA
comp232443_c1_seq1	len=584	-1.26973	-0.0350624	0.0326489	1	NA	NA	NA	NA	NA	NA	NA
comp177777_c0_seq1	len=325	1.56962	1.08508	0.00641139	0.80054	NA	NA	NA	NA	NA	NA	NA
comp247845_c0_seq2	len=259	-1.33185	0.0724752	0.00641173	0.80054	NA	NA	NA	NA	NA	NA	NA
comp173800_c0_seq1	len=250	-1.67525	-0.200263	0.00644451	0.801613	NA	NA	NA	NA	NA	NA	NA
comp167347_c0_seq1	len=232	1.72108	0.971539	0.00644931	0.801613	NA	NA	NA	NA	NA	NA	NA
comp261022_c0_seq2	len=775	-1.69465	0.225661	0.00647508	0.803012	NA	NA	NA	NA	NA	NA	NA
comp174593_c0_seq1	len=395	-1.18059	0.0125531	0.0193595	1	NA	NA	NA	NA	NA	NA	NA
comp240897_c0_seq1	len=525	-2.26253	0.682179	0.00652055	0.803938	NA	NA	NA	NA	NA	NA	NA
comp259967_c0_seq3	len=1529	1.86775	0.586461	0.00652616	0.803938	NA	NA	NA	NA	NA	NA	NA
comp178148_c1_seq1	len=249	1.95881	0.723916	0.0065408	0.803952	NA	NA	NA	NA	NA	NA	NA
comp377335_c0_seq1	len=309	1.75644	0.553579	0.0194257	1	NA	NA	NA	NA	NA	NA	NA
comp251408_c0_seq2	len=1058	-1.2496	3.96844	0.0330147	1	NA	NA	NA	NA	NA	NA	NA
comp260044_c2_seq1	len=366	1.6867	2.49288	0.0194724	1	NA	NA	NA	NA	NA	NA	NA
comp263634_c0_seq1	len=442	-1.38506	2.8891	0.00671237	0.817771	NA	NA	NA	NA	NA	NA	NA
comp131328_c0_seq1	len=202	-2.35299	0.523697	0.00674614	0.820078	NA	NA	NA	NA	NA	NA	NA
comp216899_c0_seq1	len=374	1.54372	4.59619	0.00685655	0.831672	NA	NA	NA	NA	NA	NA	NA
comp260045_c2_seq8	len=241	1.64607	2.03007	0.00687293	0.831835	NA	NA	NA	NA	NA	NA	NA
comp257219_c0_seq3	len=402	1.68059	1.26224	0.0196824	1	NA	NA	NA	NA	NA	NA	NA
comp256870_c0_seq4	len=309	1.54453	0.928425	0.00694457	0.836844	NA	NA	NA	NA	NA	NA	NA
comp129851_c0_seq1	len=218	-1.49427	0.229652	0.00695987	0.836864	NA	NA	NA	NA	NA	NA	NA
comp212464_c0_seq1	len=388	1.62949	0.482304	0.00705315	0.84624	NA	NA	NA	NA	NA	NA	NA
comp260871_c0_seq1	len=408	-1.89239	3.14959	0.00713669	0.85441	NA	NA	NA	NA	NA	NA	NA
comp192396_c1_seq1	len=242	1.26832	0.649361	0.0197959	1	NA	NA	NA	NA	NA	NA	NA
comp259085_c0_seq1	len=1117	3.02827	4.66936	0.0197992	1	NA	NA	NA	NA	NA	NA	NA
comp217536_c1_seq1	len=409	1.0584	1.70677	0.033739	1	NA	NA	NA	NA	NA	NA	NA
comp254537_c3_seq2	len=844	-1.22602	1.44077	0.0489142	1	NA	NA	NA	NA	NA	NA	NA
comp261089_c0_seq25	len=308	-1.60109	1.02239	0.00740603	0.877163	NA	NA	NA	NA	NA	NA	NA
comp236346_c0_seq2	len=883	-1.9293	1.68484	0.00743403	0.878171	NA	NA	NA	NA	NA	NA	NA
comp213865_c2_seq1	len=260	-1.1727	0.397352	0.0199716	1	NA	NA	NA	NA	NA	NA	NA
comp259392_c0_seq3	len=605	2.07414	0.0665617	0.00747213	0.878171	NA	NA	NA	NA	NA	NA	NA
comp259635_c0_seq11	len=234	1.04717	0.444541	0.0339849	1	NA	NA	NA	NA	NA	NA	NA
comp143714_c0_seq1	len=277	-1.0958	0.397078	0.0200608	1	NA	NA	NA	NA	NA	NA	NA
comp261817_c2_seq1	len=236	-1.34167	0.465639	0.00756936	0.885135	NA	NA	NA	NA	NA	NA	NA
comp239202_c0_seq1	len=512	1.75321	0.582769	0.00769021	0.894709	NA	NA	NA	NA	NA	NA	NA
comp259714_c0_seq1	len=3654	-2.08875	0.810236	0.0201385	1	NA	NA	NA	NA	NA	NA	NA
comp232233_c0_seq1	len=991	1.87105	1.29466	0.00775698	0.894709	NA	NA	NA	NA	NA	NA	NA
comp310864_c0_seq1	len=214	-1.64719	1.3673	0.0201957	1	NA	NA	NA	NA	NA	NA	NA
comp237480_c0_seq1	len=378	-1.77504	0.981102	0.00776023	0.894709	NA	NA	NA	NA	NA	NA	NA
comp234338_c1_seq1	len=273	1.9243	0.639512	0.0077748	0.894709	NA	NA	NA	NA	NA	NA	NA
comp223321_c0_seq1	len=380	1.46365	1.19291	0.0203158	1	NA	NA	NA	NA	NA	NA	NA
comp248158_c1_seq1	len=373	1.37445	0.732479	0.00778064	0.894709	NA	NA	NA	NA	NA	NA	NA
comp241276_c0_seq1	len=266	1.06326	1.01723	0.0344891	1	NA	NA	NA	NA	NA	NA	NA
comp262549_c0_seq6	len=770	-1.17167	1.15347	0.0203676	1	NA	NA	NA	NA	NA	NA	NA
comp262488_c1_seq1	len=238	1.24057	0.819238	0.0203869	1	NA	NA	NA	NA	NA	NA	NA
comp530119_c0_seq1	len=225	1.90511	-0.215524	0.00789842	0.898973	NA	NA	NA	NA	NA	NA	NA
comp202345_c0_seq1	len=202	-1.32755	0.0539084	0.00789899	0.898973	NA	NA	NA	NA	NA	NA	NA
comp242783_c0_seq1	len=643	-1.35529	2.00437	0.00797821	0.906125	NA	NA	NA	NA	NA	NA	NA
comp260016_c1_seq3	len=1356	2.2286	4.7006	0.0116947	1	NA	NA	NA	NA	NA	NA	NA
comp256529_c1_seq5	len=419	-1.23243	1.70442	0.00823179	0.931101	NA	NA	NA	NA	NA	NA	NA
comp236005_c0_seq2	len=589	-1.55949	1.14475	0.00827231	0.932937	NA	NA	NA	NA	NA	NA	NA
comp251019_c1_seq1	len=236	-1.44569	1.11775	0.00830671	0.932937	NA	NA	NA	NA	NA	NA	NA
comp130611_c0_seq1	len=393	-1.947	0.199465	0.00832364	0.932937	NA	NA	NA	NA	NA	NA	NA
comp252014_c6_seq1	len=357	1.96041	1.96171	0.00832634	0.932937	NA	NA	NA	NA	NA	NA	NA
comp159274_c0_seq1	len=316	2.06975	2.22162	0.00834997	0.932937	NA	NA	NA	NA	NA	NA	NA
comp239137_c0_seq1	len=610	1.49037	4.15906	0.00836853	0.932937	NA	NA	NA	NA	NA	NA	NA
comp262188_c2_seq1	len=449	-1.66797	1.37392	0.00840762	0.932937	NA	NA	NA	NA	NA	NA	NA
comp258425_c2_seq1	len=1224	-1.50669	2.20499	0.00841226	0.932937	NA	NA	NA	NA	NA	NA	NA
comp255093_c2_seq2	len=753	-2.47375	5.71154	0.021112	1	NA	NA	NA	NA	NA	NA	NA
comp258445_c1_seq1	len=289	-1.29658	1.30065	0.0211343	1	NA	NA	NA	NA	NA	NA	NA
comp230549_c0_seq1	len=444	1.10949	0.839718	0.035195	1	NA	NA	NA	NA	NA	NA	NA
comp259253_c1_seq1	len=503	-1.58392	0.731767	0.00857629	0.940199	NA	NA	NA	NA	NA	NA	NA
comp252129_c0_seq1	len=405	-1.07799	2.7252	0.021185	1	NA	NA	NA	NA	NA	NA	NA
comp327422_c0_seq1	len=313	-1.26419	1.20349	0.0211965	1	NA	NA	NA	NA	NA	NA	NA
comp203019_c0_seq1	len=677	1.29453	0.577771	0.0211974	1	NA	NA	NA	NA	NA	NA	NA
comp257875_c1_seq6	len=708	-1.85203	2.39162	0.00861667	0.940199	NA	NA	NA	NA	NA	NA	NA
comp223008_c0_seq1	len=257	-1.24155	0.325319	0.00863323	0.940199	NA	NA	NA	NA	NA	NA	NA
comp261646_c0_seq16	len=263	2.097	0.952756	0.00863363	0.940199	NA	NA	NA	NA	NA	NA	NA
comp216803_c0_seq1	len=530	1.46702	3.02247	0.0213078	1	NA	NA	NA	NA	NA	NA	NA
comp261398_c0_seq3	len=471	1.42266	1.43389	0.0356611	1	NA	NA	NA	NA	NA	NA	NA
comp206438_c1_seq1	len=249	1.2287	0.782243	0.00869552	0.941461	NA	NA	NA	NA	NA	NA	NA
comp229310_c0_seq1	len=491	-1.27319	1.00912	0.0262252	1	NA	NA	NA	NA	NA	NA	NA
comp261067_c0_seq6	len=228	-1.21285	3.43247	0.00871487	0.941461	NA	NA	NA	NA	NA	NA	NA
comp248243_c2_seq1	len=291	1.58163	0.426762	0.0214895	1	NA	NA	NA	NA	NA	NA	NA
comp258895_c0_seq6	len=528	-1.02404	2.0491	0.0358125	1	NA	NA	NA	NA	NA	NA	NA
comp275755_c0_seq1	len=211	2.39649	1.63504	0.00879269	0.944335	NA	NA	NA	NA	NA	NA	NA
comp239345_c0_seq2	len=699	2.49692	6.20263	0.00884644	0.948266	NA	NA	NA	NA	NA	NA	NA
comp241355_c0_seq1	len=205	-1.45036	0.101006	0.00895937	0.957436	NA	NA	NA	NA	NA	NA	NA
comp260129_c0_seq27	len=458	-1.90937	1.08392	0.00898879	0.957436	NA	NA	NA	NA	NA	NA	NA
comp236354_c0_seq1	len=872	1.94976	2.64796	0.0217327	1	NA	NA	NA	NA	NA	NA	NA
comp251426_c0_seq1	len=934	-1.36741	0.449443	0.00901288	0.957436	NA	NA	NA	NA	NA	NA	NA
comp211612_c2_seq1	len=1372	-1.7753	1.78296	0.00901853	0.957436	NA	NA	NA	NA	NA	NA	NA
comp235307_c0_seq1	len=374	1.42987	1.36552	0.00904634	0.957782	NA	NA	NA	NA	NA	NA	NA
comp258427_c0_seq8	len=881	2.18588	0.430232	0.00905978	0.957782	NA	NA	NA	NA	NA	NA	NA
comp235782_c0_seq1	len=384	1.31005	2.16393	0.00908675	0.957782	NA	NA	NA	NA	NA	NA	NA
comp213132_c0_seq1	len=661	-1.02045	1.11862	0.0221352	1	NA	NA	NA	NA	NA	NA	NA
comp179944_c1_seq1	len=334	-1.81521	1.41891	0.00915499	0.962683	NA	NA	NA	NA	NA	NA	NA
comp248810_c0_seq1	len=383	-0.932599	2.84719	0.0419703	1	NA	NA	NA	NA	NA	NA	NA
comp255704_c4_seq1	len=424	-1.12767	0.479524	0.0222049	1	NA	NA	NA	NA	NA	NA	NA
comp254842_c3_seq1	len=508	-1.27214	1.55108	0.00931234	0.973676	NA	NA	NA	NA	NA	NA	NA
comp258700_c0_seq8	len=608	1.72827	2.67416	0.00934046	0.974774	NA	NA	NA	NA	NA	NA	NA
comp180782_c0_seq1	len=590	-1.25104	1.80081	0.00937721	0.976766	NA	NA	NA	NA	NA	NA	NA
comp245643_c0_seq1	len=751	-1.29027	1.3921	0.022325	1	NA	NA	NA	NA	NA	NA	NA
comp143979_c0_seq1	len=302	-1.42545	0.318874	0.00945063	0.98072	NA	NA	NA	NA	NA	NA	NA
comp243539_c0_seq1	len=422	1.31948	1.99261	0.00949358	0.983333	NA	NA	NA	NA	NA	NA	NA
comp260681_c2_seq15	len=997	-1.39043	2.36342	0.0224674	1	NA	NA	NA	NA	NA	NA	NA
comp251086_c1_seq1	len=621	-1.19769	0.859715	0.00953733	0.984178	NA	NA	NA	NA	NA	NA	NA
comp222425_c1_seq1	len=512	1.78164	0.671182	0.0224981	1	NA	NA	NA	NA	NA	NA	NA
comp243160_c0_seq1	len=1234	1.37148	2.03798	0.00960326	0.986082	NA	NA	NA	NA	NA	NA	NA
comp176132_c0_seq1	len=276	1.26267	0.849783	0.0274692	1	NA	NA	NA	NA	NA	NA	NA
comp257291_c3_seq11	len=253	-2.89105	0.645156	0.0225777	1	NA	NA	NA	NA	NA	NA	NA
comp248988_c2_seq1	len=1796	1.61749	3.20754	0.00968578	0.990259	NA	NA	NA	NA	NA	NA	NA
comp253705_c0_seq1	len=309	1.57796	0.842997	0.00978919	0.99149	NA	NA	NA	NA	NA	NA	NA
comp228433_c0_seq1	len=411	-1.04932	0.472181	0.0226525	1	NA	NA	NA	NA	NA	NA	NA
comp258700_c0_seq17	len=259	-1.61229	0.302489	0.0228196	1	NA	NA	NA	NA	NA	NA	NA
comp261169_c2_seq4	len=2537	1.50325	-0.0909578	0.0137882	1	NA	NA	NA	NA	NA	NA	NA
comp250560_c0_seq3	len=711	2.24125	0.301907	0.00982794	0.99149	NA	NA	NA	NA	NA	NA	NA
comp505453_c0_seq1	len=289	2.33546	-0.161089	0.022882	1	NA	NA	NA	NA	NA	NA	NA
comp217795_c0_seq1	len=415	-1.63711	0.19118	0.00984546	0.99149	NA	NA	NA	NA	NA	NA	NA
comp202349_c0_seq1	len=614	-1.30248	1.55554	0.00985206	0.99149	NA	NA	NA	NA	NA	NA	NA
comp265688_c0_seq1	len=225	2.18725	2.78611	0.0098724	0.99149	NA	NA	NA	NA	NA	NA	NA
comp246191_c0_seq1	len=700	1.53509	1.64684	0.00990782	0.99149	NA	NA	NA	NA	NA	NA	NA
comp180869_c0_seq1	len=223	1.55359	0.86064	0.00992636	0.99149	NA	NA	NA	NA	NA	NA	NA
comp238417_c0_seq1	len=415	1.50945	0.517348	0.00993625	0.99149	NA	NA	NA	NA	NA	NA	NA
comp251438_c0_seq1	len=369	1.95028	0.913539	0.009954	0.99149	NA	NA	NA	NA	NA	NA	NA
comp223085_c0_seq1	len=391	-1.47759	1.2496	0.00996463	0.99149	NA	NA	NA	NA	NA	NA	NA
comp256123_c0_seq3	len=373	-2.04378	3.67805	0.00997102	0.99149	NA	NA	NA	NA	NA	NA	NA
comp246924_c0_seq1	len=1210	-3.23185	3.74803	0.0231514	1	NA	NA	NA	NA	NA	NA	NA
comp247524_c0_seq1	len=416	1.15937	0.237784	0.02321	1	NA	NA	NA	NA	NA	NA	NA
comp193295_c0_seq1	len=431	2.26394	0.871428	0.0100359	0.99149	NA	NA	NA	NA	NA	NA	NA
comp261067_c0_seq5	len=218	-1.39833	3.37961	0.0376824	1	NA	NA	NA	NA	NA	NA	NA
comp232082_c0_seq1	len=608	1.6178	1.02693	0.0100662	0.99149	NA	NA	NA	NA	NA	NA	NA
comp265082_c0_seq1	len=270	-1.22098	3.31413	0.0100743	0.99149	NA	NA	NA	NA	NA	NA	NA
comp240890_c0_seq1	len=1154	1.43179	1.91966	0.0233942	1	NA	NA	NA	NA	NA	NA	NA
comp244989_c1_seq1	len=443	-1.1749	-0.0723827	0.0234101	1	NA	NA	NA	NA	NA	NA	NA
comp199569_c0_seq1	len=285	1.17947	0.757191	0.014497	1	NA	NA	NA	NA	NA	NA	NA
comp198204_c0_seq1	len=214	-1.27449	0.59379	0.0234802	1	NA	NA	NA	NA	NA	NA	NA
comp254746_c2_seq1	len=1015	-1.19849	3.5255	0.0103246	1	NA	NA	NA	NA	NA	NA	NA
comp238777_c0_seq1	len=261	-1.03102	0.8424	0.0235808	1	NA	NA	NA	NA	NA	NA	NA
comp261364_c2_seq15	len=743	-1.51401	0.803682	0.0235939	1	NA	NA	NA	NA	NA	NA	NA
comp243924_c1_seq1	len=417	1.07982	0.981925	0.0235958	1	NA	NA	NA	NA	NA	NA	NA
comp229295_c1_seq1	len=387	1.23609	0.402032	0.0287964	1	NA	NA	NA	NA	NA	NA	NA
comp256871_c1_seq1	len=315	1.2727	0.278162	0.0104474	1	NA	NA	NA	NA	NA	NA	NA
comp179391_c0_seq1	len=448	-1.39883	2.60457	0.0236594	1	NA	NA	NA	NA	NA	NA	NA
comp242053_c0_seq1	len=307	1.88895	1.61879	0.0105561	1	NA	NA	NA	NA	NA	NA	NA
comp257219_c0_seq2	len=718	2.04539	2.25708	0.0106102	1	NA	NA	NA	NA	NA	NA	NA
comp233675_c0_seq1	len=785	-1.00556	4.58289	0.0237524	1	NA	NA	NA	NA	NA	NA	NA
comp254134_c0_seq2	len=978	1.95951	0.0704503	0.010718	1	NA	NA	NA	NA	NA	NA	NA
comp237327_c0_seq1	len=439	-1.27357	2.36671	0.023874	1	NA	NA	NA	NA	NA	NA	NA
comp259026_c0_seq1	len=1662	-1.69876	0.710492	0.0107495	1	NA	NA	NA	NA	NA	NA	NA
comp250997_c0_seq4	len=728	-1.31418	0.957062	0.0240671	1	NA	NA	NA	NA	NA	NA	NA
comp254482_c1_seq3	len=658	1.92328	2.11536	0.010805	1	NA	NA	NA	NA	NA	NA	NA
comp178472_c0_seq1	len=219	1.30171	1.71996	0.0108401	1	NA	NA	NA	NA	NA	NA	NA
comp239424_c2_seq1	len=480	-1.44523	1.77206	0.0109445	1	NA	NA	NA	NA	NA	NA	NA
comp249340_c1_seq2	len=901	2.3078	2.35879	0.0109952	1	NA	NA	NA	NA	NA	NA	NA
comp260184_c4_seq2	len=1092	-1.21308	3.47023	0.0110329	1	NA	NA	NA	NA	NA	NA	NA
comp261455_c3_seq2	len=264	1.10871	0.756593	0.0391552	1	NA	NA	NA	NA	NA	NA	NA
comp238744_c0_seq2	len=432	2.02825	0.433977	0.0111575	1	NA	NA	NA	NA	NA	NA	NA
comp177744_c0_seq1	len=466	-1.21733	2.1982	0.0111726	1	NA	NA	NA	NA	NA	NA	NA
comp235610_c0_seq1	len=442	1.78377	1.34773	0.0111815	1	NA	NA	NA	NA	NA	NA	NA
comp354863_c0_seq1	len=438	-1.37077	1.47641	0.0393162	1	NA	NA	NA	NA	NA	NA	NA
comp247003_c0_seq2	len=1804	-1.18346	2.12708	0.0245828	1	NA	NA	NA	NA	NA	NA	NA
comp241077_c2_seq1	len=902	1.59267	1.33613	0.0112281	1	NA	NA	NA	NA	NA	NA	NA
comp238846_c0_seq1	len=370	1.20663	0.809673	0.0112363	1	NA	NA	NA	NA	NA	NA	NA
comp239633_c0_seq3	len=797	1.24974	2.66349	0.0113858	1	NA	NA	NA	NA	NA	NA	NA
comp255104_c1_seq1	len=289	-1.02847	0.242001	0.0247268	1	NA	NA	NA	NA	NA	NA	NA
comp196915_c0_seq1	len=331	-1.23593	0.0920275	0.0114127	1	NA	NA	NA	NA	NA	NA	NA
comp254166_c1_seq1	len=2503	-1.30374	7.14731	0.0115131	1	NA	NA	NA	NA	NA	NA	NA
comp260631_c0_seq3	len=437	2.64436	0.0607535	0.0115221	1	NA	NA	NA	NA	NA	NA	NA
comp261460_c0_seq11	len=587	-1.08137	1.25046	0.0249044	1	NA	NA	NA	NA	NA	NA	NA
comp204057_c0_seq1	len=495	1.18287	0.962622	0.0249258	1	NA	NA	NA	NA	NA	NA	NA
comp442273_c0_seq1	len=287	1.9235	0.416284	0.0249839	1	NA	NA	NA	NA	NA	NA	NA
comp260972_c0_seq2	len=2851	-1.25564	0.290981	0.011566	1	NA	NA	NA	NA	NA	NA	NA
comp220647_c0_seq1	len=429	1.20981	1.04367	0.0115786	1	NA	NA	NA	NA	NA	NA	NA
comp223198_c0_seq1	len=332	1.63348	1.21158	0.0116013	1	NA	NA	NA	NA	NA	NA	NA
comp227064_c0_seq1	len=310	1.62638	2.23096	0.0116186	1	NA	NA	NA	NA	NA	NA	NA
comp236389_c0_seq1	len=1105	1.82263	2.14688	0.0251702	1	NA	NA	NA	NA	NA	NA	NA
comp198945_c0_seq1	len=266	-1.00738	0.365227	0.0399773	1	NA	NA	NA	NA	NA	NA	NA
comp243949_c0_seq1	len=449	-1.27668	1.81066	0.0399855	1	NA	NA	NA	NA	NA	NA	NA
comp211211_c0_seq1	len=391	-0.954735	0.873343	0.0445761	1	NA	NA	NA	NA	NA	NA	NA
comp257487_c1_seq1	len=218	-1.34795	0.504631	0.0117096	1	NA	NA	NA	NA	NA	NA	NA
comp249533_c0_seq2	len=493	1.30169	1.28432	0.0117129	1	NA	NA	NA	NA	NA	NA	NA
comp137338_c0_seq1	len=356	1.10148	0.617269	0.0252957	1	NA	NA	NA	NA	NA	NA	NA
comp140747_c0_seq1	len=461	-1.72374	1.49183	0.025305	1	NA	NA	NA	NA	NA	NA	NA
comp139929_c0_seq1	len=285	-1.38333	0.264548	0.0302011	1	NA	NA	NA	NA	NA	NA	NA
comp160823_c0_seq1	len=218	1.21216	1.1923	0.0118199	1	NA	NA	NA	NA	NA	NA	NA
comp240810_c1_seq1	len=408	-0.891924	1.08548	0.0405528	1	NA	NA	NA	NA	NA	NA	NA
comp177830_c0_seq1	len=552	0.994717	1.44724	0.0406129	1	NA	NA	NA	NA	NA	NA	NA
comp259321_c10_seq1	len=1019	2.32232	3.28565	0.0119269	1	NA	NA	NA	NA	NA	NA	NA
comp223871_c0_seq1	len=314	-1.65327	1.93407	0.011968	1	NA	NA	NA	NA	NA	NA	NA
comp139308_c0_seq1	len=204	-1.61329	1.91905	0.0120056	1	NA	NA	NA	NA	NA	NA	NA
comp243594_c0_seq1	len=542	1.99975	1.62318	0.0120442	1	NA	NA	NA	NA	NA	NA	NA
comp225957_c0_seq1	len=335	1.15959	0.542738	0.025878	1	NA	NA	NA	NA	NA	NA	NA
comp239638_c0_seq1	len=934	-1.51651	2.85993	0.0121178	1	NA	NA	NA	NA	NA	NA	NA
comp262056_c0_seq6	len=446	1.15986	0.896326	0.0122489	1	NA	NA	NA	NA	NA	NA	NA
comp249164_c0_seq1	len=267	2.15847	0.364821	0.0123136	1	NA	NA	NA	NA	NA	NA	NA
comp218362_c0_seq1	len=245	1.86236	-0.312278	0.0410667	1	NA	NA	NA	NA	NA	NA	NA
comp238582_c0_seq2	len=1117	1.73553	1.22583	0.012344	1	NA	NA	NA	NA	NA	NA	NA
comp235668_c1_seq1	len=295	1.22919	1.34515	0.0123974	1	NA	NA	NA	NA	NA	NA	NA
comp246183_c0_seq1	len=224	1.83334	0.187526	0.0125497	1	NA	NA	NA	NA	NA	NA	NA
comp136495_c0_seq1	len=279	-2.38401	-0.0386894	0.0125542	1	NA	NA	NA	NA	NA	NA	NA
comp257396_c0_seq2	len=1107	-1.31623	0.631301	0.0262103	1	NA	NA	NA	NA	NA	NA	NA
comp180383_c0_seq1	len=278	-1.08935	0.800978	0.0307837	1	NA	NA	NA	NA	NA	NA	NA
comp246331_c0_seq2	len=432	1.91515	0.939091	0.0126349	1	NA	NA	NA	NA	NA	NA	NA
comp245359_c0_seq3	len=241	-1.85261	0.53546	0.012644	1	NA	NA	NA	NA	NA	NA	NA
comp221780_c0_seq1	len=501	-1.30319	1.72548	0.0126706	1	NA	NA	NA	NA	NA	NA	NA
comp230957_c0_seq1	len=946	1.23046	1.78687	0.0126993	1	NA	NA	NA	NA	NA	NA	NA
comp260070_c2_seq1	len=536	1.52849	1.29551	0.0127328	1	NA	NA	NA	NA	NA	NA	NA
comp250997_c0_seq1	len=617	-1.53747	0.15927	0.0127419	1	NA	NA	NA	NA	NA	NA	NA
comp130416_c0_seq1	len=282	-1.3327	-0.00783852	0.0128905	1	NA	NA	NA	NA	NA	NA	NA
comp250795_c1_seq3	len=720	-1.14594	1.14496	0.0129089	1	NA	NA	NA	NA	NA	NA	NA
comp260129_c0_seq6	len=481	-1.71981	2.58564	0.0129432	1	NA	NA	NA	NA	NA	NA	NA
comp235158_c0_seq1	len=343	1.36744	0.449704	0.0129708	1	NA	NA	NA	NA	NA	NA	NA
comp256152_c0_seq1	len=585	-1.34998	1.37517	0.0129827	1	NA	NA	NA	NA	NA	NA	NA
comp260707_c0_seq6	len=367	1.88897	1.26828	0.0129934	1	NA	NA	NA	NA	NA	NA	NA
comp216383_c0_seq1	len=253	-1.83498	1.92448	0.013102	1	NA	NA	NA	NA	NA	NA	NA
comp244800_c0_seq4	len=617	1.23433	4.83685	0.0131116	1	NA	NA	NA	NA	NA	NA	NA
comp235477_c1_seq1	len=619	-1.89811	1.26087	0.0131125	1	NA	NA	NA	NA	NA	NA	NA
comp255259_c1_seq2	len=1192	-1.43014	1.96201	0.0177274	1	NA	NA	NA	NA	NA	NA	NA
comp153975_c0_seq1	len=304	-1.35188	0.213554	0.0131457	1	NA	NA	NA	NA	NA	NA	NA
comp233197_c0_seq1	len=230	1.78739	0.985855	0.0131778	1	NA	NA	NA	NA	NA	NA	NA
comp260072_c4_seq4	len=546	1.38493	0.906121	0.0270798	1	NA	NA	NA	NA	NA	NA	NA
comp217440_c0_seq1	len=834	1.59204	3.30616	0.0271046	1	NA	NA	NA	NA	NA	NA	NA
comp230689_c0_seq1	len=406	-0.945332	0.916375	0.0421267	1	NA	NA	NA	NA	NA	NA	NA
comp256387_c0_seq5	len=421	-1.31197	0.730246	0.0271385	1	NA	NA	NA	NA	NA	NA	NA
comp245499_c0_seq1	len=376	1.24619	2.40295	0.0422007	1	NA	NA	NA	NA	NA	NA	NA
comp259842_c0_seq3	len=1716	2.05964	1.00682	0.0133372	1	NA	NA	NA	NA	NA	NA	NA
comp248845_c0_seq2	len=204	1.15678	0.336716	0.0272576	1	NA	NA	NA	NA	NA	NA	NA
comp246376_c0_seq1	len=796	1.13514	3.59033	0.0424105	1	NA	NA	NA	NA	NA	NA	NA
comp200302_c1_seq1	len=234	-1.29044	0.498657	0.0134931	1	NA	NA	NA	NA	NA	NA	NA
comp230721_c2_seq1	len=453	-1.10717	0.310583	0.0182231	1	NA	NA	NA	NA	NA	NA	NA
comp238839_c0_seq1	len=275	-1.29449	0.294161	0.0135406	1	NA	NA	NA	NA	NA	NA	NA
comp262289_c1_seq8	len=436	1.75622	1.38114	0.0135953	1	NA	NA	NA	NA	NA	NA	NA
comp235819_c0_seq1	len=445	-1.77555	2.2191	0.0136992	1	NA	NA	NA	NA	NA	NA	NA
comp250116_c1_seq1	len=369	1.12156	1.79529	0.0277	1	NA	NA	NA	NA	NA	NA	NA
comp236594_c0_seq1	len=245	-1.44379	1.28421	0.0137524	1	NA	NA	NA	NA	NA	NA	NA
comp244514_c0_seq1	len=435	1.16398	1.683	0.0184968	1	NA	NA	NA	NA	NA	NA	NA
comp236265_c0_seq1	len=288	1.37917	0.183537	0.0138037	1	NA	NA	NA	NA	NA	NA	NA
comp261318_c2_seq1	len=412	1.05319	1.27499	0.027918	1	NA	NA	NA	NA	NA	NA	NA
comp289361_c0_seq1	len=368	-1.5222	2.51084	0.0140166	1	NA	NA	NA	NA	NA	NA	NA
comp257281_c0_seq6	len=434	-1.77057	1.71844	0.014041	1	NA	NA	NA	NA	NA	NA	NA
comp244585_c2_seq1	len=240	-1.168	0.519993	0.0322238	1	NA	NA	NA	NA	NA	NA	NA
comp262461_c0_seq32	len=845	1.22731	1.61338	0.0280685	1	NA	NA	NA	NA	NA	NA	NA
comp179218_c1_seq1	len=209	-1.01773	1.03563	0.0281142	1	NA	NA	NA	NA	NA	NA	NA
comp262046_c0_seq2	len=999	-1.20202	0.750919	0.0140828	1	NA	NA	NA	NA	NA	NA	NA
comp234606_c0_seq1	len=438	-1.49529	-0.221022	0.0141214	1	NA	NA	NA	NA	NA	NA	NA
comp261350_c1_seq5	len=911	-1.5066	1.05223	0.0141486	1	NA	NA	NA	NA	NA	NA	NA
comp235332_c0_seq1	len=486	-1.2168	1.57315	0.0282592	1	NA	NA	NA	NA	NA	NA	NA
comp131265_c0_seq1	len=290	-1.19006	0.71353	0.0141953	1	NA	NA	NA	NA	NA	NA	NA
comp215661_c0_seq1	len=225	1.26125	0.208358	0.0142596	1	NA	NA	NA	NA	NA	NA	NA
comp275116_c0_seq1	len=761	1.58934	3.70642	0.0142733	1	NA	NA	NA	NA	NA	NA	NA
comp242011_c0_seq1	len=352	-0.983621	0.693539	0.028371	1	NA	NA	NA	NA	NA	NA	NA
comp131720_c0_seq1	len=266	1.1692	0.314828	0.0144097	1	NA	NA	NA	NA	NA	NA	NA
comp249848_c0_seq1	len=735	-1.16521	2.15996	0.0144208	1	NA	NA	NA	NA	NA	NA	NA
comp242343_c0_seq2	len=423	1.07682	1.93027	0.0285628	1	NA	NA	NA	NA	NA	NA	NA
comp256588_c1_seq3	len=1752	-0.988182	6.32083	0.0433407	1	NA	NA	NA	NA	NA	NA	NA
comp198835_c0_seq1	len=407	-0.96666	2.71634	0.0326598	1	NA	NA	NA	NA	NA	NA	NA
comp264460_c0_seq1	len=1544	1.94747	5.41937	0.0145568	1	NA	NA	NA	NA	NA	NA	NA
comp230836_c0_seq1	len=277	-1.31438	1.40099	0.0434243	1	NA	NA	NA	NA	NA	NA	NA
comp214972_c0_seq1	len=224	1.26133	0.465832	0.0286974	1	NA	NA	NA	NA	NA	NA	NA
comp244545_c0_seq2	len=791	-1.5826	-0.173717	0.0287089	1	NA	NA	NA	NA	NA	NA	NA
comp250424_c0_seq3	len=233	1.38342	0.745629	0.0146187	1	NA	NA	NA	NA	NA	NA	NA
comp257526_c4_seq2	len=759	1.38949	0.991463	0.019401	1	NA	NA	NA	NA	NA	NA	NA
comp252784_c0_seq1	len=1977	1.64486	1.62661	0.0147495	1	NA	NA	NA	NA	NA	NA	NA
comp258207_c0_seq1	len=343	-1.39715	0.967036	0.0147872	1	NA	NA	NA	NA	NA	NA	NA
comp251024_c0_seq2	len=282	1.25667	0.906886	0.0148142	1	NA	NA	NA	NA	NA	NA	NA
comp235347_c0_seq1	len=727	1.76963	3.39924	0.0148456	1	NA	NA	NA	NA	NA	NA	NA
comp267347_c0_seq1	len=878	-1.28327	4.5013	0.0149094	1	NA	NA	NA	NA	NA	NA	NA
comp261721_c1_seq1	len=765	-0.963456	3.77251	0.0289344	1	NA	NA	NA	NA	NA	NA	NA
comp261914_c1_seq1	len=215	-1.59553	2.02418	0.0149656	1	NA	NA	NA	NA	NA	NA	NA
comp197662_c0_seq1	len=666	1.5309	3.56035	0.0289842	1	NA	NA	NA	NA	NA	NA	NA
comp237194_c0_seq1	len=404	-1.0475	0.313161	0.0290348	1	NA	NA	NA	NA	NA	NA	NA
comp259238_c0_seq2	len=2008	-1.48628	1.72634	0.0150825	1	NA	NA	NA	NA	NA	NA	NA
comp240769_c0_seq1	len=404	-1.22566	1.54268	0.0150935	1	NA	NA	NA	NA	NA	NA	NA
comp255633_c1_seq1	len=947	-1.37169	3.04986	0.029094	1	NA	NA	NA	NA	NA	NA	NA
comp235821_c0_seq2	len=285	1.36882	1.35244	0.0151609	1	NA	NA	NA	NA	NA	NA	NA
comp242326_c0_seq1	len=1317	-1.2428	1.83692	0.0293093	1	NA	NA	NA	NA	NA	NA	NA
comp266410_c0_seq1	len=424	1.70118	4.2309	0.0152048	1	NA	NA	NA	NA	NA	NA	NA
comp202078_c0_seq1	len=452	0.979667	1.44816	0.0440692	1	NA	NA	NA	NA	NA	NA	NA
comp192581_c0_seq1	len=201	-1.06452	0.193046	0.0294755	1	NA	NA	NA	NA	NA	NA	NA
comp130171_c0_seq1	len=201	-1.06268	0.322934	0.0294982	1	NA	NA	NA	NA	NA	NA	NA
comp250701_c0_seq1	len=591	-2.13077	1.82086	0.0153595	1	NA	NA	NA	NA	NA	NA	NA
comp226569_c2_seq1	len=248	-1.77783	0.265407	0.0295517	1	NA	NA	NA	NA	NA	NA	NA
comp246146_c0_seq1	len=459	1.33146	2.30454	0.0154053	1	NA	NA	NA	NA	NA	NA	NA
comp244973_c1_seq1	len=981	-1.19788	1.95859	0.0156441	1	NA	NA	NA	NA	NA	NA	NA
comp162278_c0_seq1	len=242	1.02147	1.49364	0.0295978	1	NA	NA	NA	NA	NA	NA	NA
comp253306_c0_seq1	len=217	-1.88203	4.92378	0.0157596	1	NA	NA	NA	NA	NA	NA	NA
comp211210_c0_seq2	len=323	-1.39394	1.0597	0.0296637	1	NA	NA	NA	NA	NA	NA	NA
comp228294_c1_seq1	len=362	1.64611	0.318204	0.0158626	1	NA	NA	NA	NA	NA	NA	NA
comp360139_c0_seq1	len=314	1.21922	0.730145	0.0158968	1	NA	NA	NA	NA	NA	NA	NA
comp220768_c0_seq1	len=407	1.70652	0.577938	0.0159096	1	NA	NA	NA	NA	NA	NA	NA
comp207239_c1_seq1	len=205	-1.42911	-0.0139942	0.0202313	1	NA	NA	NA	NA	NA	NA	NA
comp197723_c0_seq1	len=346	1.11093	1.02985	0.0298403	1	NA	NA	NA	NA	NA	NA	NA
comp223213_c0_seq1	len=431	-1.32265	1.27366	0.0159422	1	NA	NA	NA	NA	NA	NA	NA
comp255210_c2_seq14	len=498	-1.26032	1.92433	0.0159958	1	NA	NA	NA	NA	NA	NA	NA
comp260283_c0_seq7	len=733	1.54191	2.01446	0.0160356	1	NA	NA	NA	NA	NA	NA	NA
comp187667_c1_seq1	len=330	-2.79528	0.72725	0.0160903	1	NA	NA	NA	NA	NA	NA	NA
comp252358_c0_seq1	len=681	1.61886	1.61905	0.0161886	1	NA	NA	NA	NA	NA	NA	NA
comp237130_c0_seq1	len=280	-1.16011	0.448843	0.0162097	1	NA	NA	NA	NA	NA	NA	NA
comp262175_c2_seq1	len=976	-1.20608	3.10857	0.0162803	1	NA	NA	NA	NA	NA	NA	NA
comp257444_c0_seq11	len=1299	-2.16162	0.00825295	0.0204906	1	NA	NA	NA	NA	NA	NA	NA
comp240544_c0_seq1	len=601	-1.1841	1.6614	0.0205006	1	NA	NA	NA	NA	NA	NA	NA
comp257177_c0_seq5	len=441	1.16068	0.683604	0.0163849	1	NA	NA	NA	NA	NA	NA	NA
comp206909_c0_seq1	len=259	-1.02469	0.034623	0.0301951	1	NA	NA	NA	NA	NA	NA	NA
comp198454_c0_seq1	len=556	1.14689	1.56598	0.0164511	1	NA	NA	NA	NA	NA	NA	NA
comp171567_c0_seq1	len=1455	2.09058	3.23214	0.0348061	1	NA	NA	NA	NA	NA	NA	NA
comp236676_c1_seq1	len=334	-1.1544	1.70454	0.0164759	1	NA	NA	NA	NA	NA	NA	NA
comp250821_c1_seq1	len=221	-0.914252	1.5659	0.0448446	1	NA	NA	NA	NA	NA	NA	NA
comp257818_c1_seq1	len=386	-1.09045	1.16933	0.0449238	1	NA	NA	NA	NA	NA	NA	NA
comp252350_c4_seq1	len=502	-0.935538	0.595979	0.0449324	1	NA	NA	NA	NA	NA	NA	NA
comp230472_c1_seq1	len=541	1.31913	0.853506	0.0303526	1	NA	NA	NA	NA	NA	NA	NA
comp434741_c0_seq1	len=393	2.26139	1.06445	0.0166068	1	NA	NA	NA	NA	NA	NA	NA
comp223088_c0_seq1	len=303	-0.979055	0.293475	0.0449895	1	NA	NA	NA	NA	NA	NA	NA
comp261860_c5_seq2	len=1532	-1.57469	0.294196	0.0258754	1	NA	NA	NA	NA	NA	NA	NA
comp254344_c1_seq1	len=292	0.992847	2.15609	0.0305707	1	NA	NA	NA	NA	NA	NA	NA
comp235790_c0_seq1	len=203	-1.21015	0.607214	0.0167928	1	NA	NA	NA	NA	NA	NA	NA
comp237741_c0_seq2	len=343	1.24993	0.99181	0.0451303	1	NA	NA	NA	NA	NA	NA	NA
comp260384_c0_seq1	len=211	1.37145	3.87126	0.0168498	1	NA	NA	NA	NA	NA	NA	NA
comp223446_c0_seq1	len=458	1.53123	2.56209	0.0452159	1	NA	NA	NA	NA	NA	NA	NA
comp253658_c1_seq2	len=819	1.10761	2.42111	0.0307113	1	NA	NA	NA	NA	NA	NA	NA
comp206670_c0_seq1	len=212	1.17488	3.99906	0.0170712	1	NA	NA	NA	NA	NA	NA	NA
comp230876_c0_seq1	len=246	-1.12175	1.05023	0.0171054	1	NA	NA	NA	NA	NA	NA	NA
comp217567_c0_seq1	len=407	-1.5019	2.21754	0.0171289	1	NA	NA	NA	NA	NA	NA	NA
comp240773_c0_seq1	len=588	1.99491	1.15354	0.0213361	1	NA	NA	NA	NA	NA	NA	NA
comp216707_c0_seq2	len=240	1.8448	1.79316	0.0171434	1	NA	NA	NA	NA	NA	NA	NA
comp229208_c0_seq1	len=234	1.15235	0.676029	0.0454295	1	NA	NA	NA	NA	NA	NA	NA
comp143056_c0_seq1	len=230	1.15815	0.645373	0.0172202	1	NA	NA	NA	NA	NA	NA	NA
comp180448_c0_seq1	len=227	-1.17872	1.14242	0.0308385	1	NA	NA	NA	NA	NA	NA	NA
comp259556_c0_seq1	len=2134	-1.51354	-0.0763663	0.0173096	1	NA	NA	NA	NA	NA	NA	NA
comp246498_c0_seq4	len=460	-1.13641	0.253529	0.0308678	1	NA	NA	NA	NA	NA	NA	NA
comp234892_c1_seq1	len=237	1.31775	0.482139	0.0173625	1	NA	NA	NA	NA	NA	NA	NA
comp255093_c2_seq1	len=635	2.09884	4.13383	0.0458668	1	NA	NA	NA	NA	NA	NA	NA
comp248560_c0_seq2	len=500	1.33241	0.530391	0.0174594	1	NA	NA	NA	NA	NA	NA	NA
comp253943_c1_seq1	len=574	-1.61874	3.91281	0.031059	1	NA	NA	NA	NA	NA	NA	NA
comp237988_c0_seq1	len=332	-1.45513	1.54378	0.0460346	1	NA	NA	NA	NA	NA	NA	NA
comp254757_c0_seq1	len=657	-1.18491	3.10675	0.031238	1	NA	NA	NA	NA	NA	NA	NA
comp246543_c1_seq1	len=237	-0.94347	0.715171	0.0461771	1	NA	NA	NA	NA	NA	NA	NA
comp261704_c1_seq11	len=317	-1.33187	2.14297	0.017683	1	NA	NA	NA	NA	NA	NA	NA
comp256457_c0_seq1	len=721	-1.90856	2.04087	0.0312874	1	NA	NA	NA	NA	NA	NA	NA
comp244337_c0_seq1	len=1163	-1.47199	4.37072	0.0221996	1	NA	NA	NA	NA	NA	NA	NA
comp259660_c3_seq3	len=649	-1.95895	-0.331727	0.0312895	1	NA	NA	NA	NA	NA	NA	NA
comp248085_c0_seq1	len=633	1.24735	1.62646	0.0313212	1	NA	NA	NA	NA	NA	NA	NA
comp259963_c1_seq8	len=404	1.4621	0.786509	0.0177679	1	NA	NA	NA	NA	NA	NA	NA
comp143701_c0_seq1	len=305	1.17734	0.264775	0.0316429	1	NA	NA	NA	NA	NA	NA	NA
comp262545_c0_seq4	len=1342	-1.31376	1.04964	0.0317019	1	NA	NA	NA	NA	NA	NA	NA
comp254593_c0_seq1	len=519	1.54345	0.965485	0.0317402	1	NA	NA	NA	NA	NA	NA	NA
comp253718_c0_seq2	len=389	-1.19794	0.712637	0.0317997	1	NA	NA	NA	NA	NA	NA	NA
comp241454_c1_seq2	len=248	1.51306	0.975945	0.0180295	1	NA	NA	NA	NA	NA	NA	NA
comp235274_c0_seq1	len=769	1.71253	1.78814	0.018034	1	NA	NA	NA	NA	NA	NA	NA
comp252043_c2_seq2	len=364	2.02115	1.14066	0.0180634	1	NA	NA	NA	NA	NA	NA	NA
comp252848_c0_seq1	len=624	1.14225	1.7317	0.0181306	1	NA	NA	NA	NA	NA	NA	NA
comp239162_c0_seq1	len=486	1.16197	0.88307	0.0225524	1	NA	NA	NA	NA	NA	NA	NA
comp263675_c0_seq1	len=691	-1.25221	4.98717	0.0470388	1	NA	NA	NA	NA	NA	NA	NA
comp255206_c3_seq2	len=438	1.99467	0.835522	0.0183412	1	NA	NA	NA	NA	NA	NA	NA
comp288442_c0_seq1	len=258	-1.67452	1.46918	0.0183436	1	NA	NA	NA	NA	NA	NA	NA
comp259877_c1_seq9	len=586	1.20416	1.58357	0.0183996	1	NA	NA	NA	NA	NA	NA	NA
comp261636_c0_seq2	len=526	-1.28982	0.807529	0.0321016	1	NA	NA	NA	NA	NA	NA	NA
comp258886_c0_seq2	len=3023	1.50154	2.35352	0.0369996	1	NA	NA	NA	NA	NA	NA	NA
comp257501_c0_seq4	len=371	1.16258	1.19179	0.0321119	1	NA	NA	NA	NA	NA	NA	NA
comp247557_c0_seq1	len=321	-0.999865	0.895638	0.0321145	1	NA	NA	NA	NA	NA	NA	NA
comp261279_c1_seq1	len=510	-1.05129	1.41493	0.0321596	1	NA	NA	NA	NA	NA	NA	NA
comp142053_c0_seq1	len=290	-1.27377	0.244016	0.0187171	1	NA	NA	NA	NA	NA	NA	NA
comp203866_c0_seq1	len=238	1.24919	1.08697	0.0371216	1	NA	NA	NA	NA	NA	NA	NA
comp402188_c0_seq1	len=376	-0.948854	0.708102	0.0476651	1	NA	NA	NA	NA	NA	NA	NA
comp234678_c0_seq1	len=790	1.19907	2.92063	0.0188188	1	NA	NA	NA	NA	NA	NA	NA
comp231057_c0_seq1	len=745	-1.38308	4.19819	0.0188352	1	NA	NA	NA	NA	NA	NA	NA
comp242777_c0_seq1	len=320	-0.978371	1.27031	0.0324217	1	NA	NA	NA	NA	NA	NA	NA
comp202448_c0_seq1	len=425	-1.09698	1.04056	0.018837	1	NA	NA	NA	NA	NA	NA	NA
comp253918_c1_seq1	len=256	-1.10804	1.29439	0.0231027	1	NA	NA	NA	NA	NA	NA	NA
comp235096_c0_seq1	len=263	1.0176	0.503457	0.0325002	1	NA	NA	NA	NA	NA	NA	NA
comp262130_c2_seq1	len=360	1.20297	1.69357	0.0189607	1	NA	NA	NA	NA	NA	NA	NA
comp252811_c0_seq1	len=1545	1.74334	5.99942	0.0325243	1	NA	NA	NA	NA	NA	NA	NA
comp230764_c0_seq1	len=561	1.06399	5.6433	0.0479686	1	NA	NA	NA	NA	NA	NA	NA
comp144240_c0_seq1	len=327	1.25115	0.340617	0.0325605	1	NA	NA	NA	NA	NA	NA	NA
comp199384_c0_seq1	len=232	1.50834	0.207526	0.019113	1	NA	NA	NA	NA	NA	NA	NA
comp249274_c0_seq2	len=273	1.07843	0.755269	0.0480087	1	NA	NA	NA	NA	NA	NA	NA
comp220074_c0_seq1	len=274	2.19091	0.649439	0.0191674	1	NA	NA	NA	NA	NA	NA	NA
comp243945_c2_seq1	len=381	-1.1455	1.20186	0.0381532	1	NA	NA	NA	NA	NA	NA	NA
comp237602_c2_seq1	len=276	-1.13446	1.6181	0.0192352	1	NA	NA	NA	NA	NA	NA	NA
comp260154_c0_seq16	len=232	-1.53429	0.387271	0.0193129	1	NA	NA	NA	NA	NA	NA	NA
comp260203_c0_seq2	len=462	1.52014	0.839468	0.0193414	1	NA	NA	NA	NA	NA	NA	NA
comp240545_c0_seq1	len=337	1.04008	0.943709	0.0327939	1	NA	NA	NA	NA	NA	NA	NA
comp230931_c0_seq1	len=341	1.11671	0.37435	0.0193804	1	NA	NA	NA	NA	NA	NA	NA
comp261417_c0_seq1	len=2452	1.72573	1.9642	0.0435971	1	NA	NA	NA	NA	NA	NA	NA
comp244819_c0_seq1	len=393	1.2245	1.02385	0.0194226	1	NA	NA	NA	NA	NA	NA	NA
comp248393_c0_seq2	len=1752	1.07232	4.26315	0.0329803	1	NA	NA	NA	NA	NA	NA	NA
comp244784_c0_seq1	len=597	1.09675	2.58431	0.0384213	1	NA	NA	NA	NA	NA	NA	NA
comp282648_c0_seq1	len=214	1.56725	1.4824	0.0485595	1	NA	NA	NA	NA	NA	NA	NA
comp176096_c0_seq1	len=356	-1.08207	1.43151	0.019534	1	NA	NA	NA	NA	NA	NA	NA
comp207772_c0_seq1	len=213	1.1244	0.421169	0.0332759	1	NA	NA	NA	NA	NA	NA	NA
comp260977_c0_seq14	len=573	2.15072	4.65497	0.0195962	1	NA	NA	NA	NA	NA	NA	NA
comp254412_c3_seq2	len=541	-1.69285	2.01292	0.0196051	1	NA	NA	NA	NA	NA	NA	NA
comp281206_c0_seq1	len=212	-1.83155	1.37536	0.0333348	1	NA	NA	NA	NA	NA	NA	NA
comp224660_c0_seq1	len=227	-1.01277	0.762174	0.033339	1	NA	NA	NA	NA	NA	NA	NA
comp234276_c1_seq1	len=320	1.26722	0.276628	0.0196915	1	NA	NA	NA	NA	NA	NA	NA
comp242194_c1_seq1	len=245	-1.22716	1.12156	0.0196985	1	NA	NA	NA	NA	NA	NA	NA
comp261879_c0_seq11	len=215	1.34041	1.72265	0.0197231	1	NA	NA	NA	NA	NA	NA	NA
comp228902_c0_seq1	len=208	-1.3863	0.948406	0.0335202	1	NA	NA	NA	NA	NA	NA	NA
comp260841_c0_seq9	len=231	1.16413	0.45835	0.048879	1	NA	NA	NA	NA	NA	NA	NA
comp259983_c2_seq1	len=923	1.43766	0.90549	0.0489027	1	NA	NA	NA	NA	NA	NA	NA
comp178587_c0_seq1	len=219	-1.2977	-0.019709	0.0244207	1	NA	NA	NA	NA	NA	NA	NA
comp260129_c0_seq9	len=1206	-1.91449	2.8117	0.0199405	1	NA	NA	NA	NA	NA	NA	NA
comp252634_c2_seq1	len=439	1.39232	1.4153	0.0199671	1	NA	NA	NA	NA	NA	NA	NA
comp261100_c4_seq18	len=239	1.06059	4.39639	0.0338967	1	NA	NA	NA	NA	NA	NA	NA
comp549200_c0_seq1	len=308	-1.15567	0.0269825	0.0200179	1	NA	NA	NA	NA	NA	NA	NA
comp214061_c0_seq1	len=362	-0.94161	3.31287	0.0491549	1	NA	NA	NA	NA	NA	NA	NA
comp250311_c3_seq1	len=217	-1.09042	1.14701	0.0340681	1	NA	NA	NA	NA	NA	NA	NA
comp239741_c0_seq1	len=328	-1.99665	0.517561	0.0200942	1	NA	NA	NA	NA	NA	NA	NA
comp254475_c0_seq3	len=349	1.39424	2.05595	0.0201216	1	NA	NA	NA	NA	NA	NA	NA
comp262046_c0_seq13	len=433	-1.02692	2.53194	0.0341779	1	NA	NA	NA	NA	NA	NA	NA
comp202198_c0_seq1	len=281	1.12328	0.422092	0.049266	1	NA	NA	NA	NA	NA	NA	NA
comp250475_c0_seq2	len=343	1.19737	1.41604	0.0342115	1	NA	NA	NA	NA	NA	NA	NA
comp254714_c5_seq1	len=447	-1.39743	1.45584	0.0297906	1	NA	NA	NA	NA	NA	NA	NA
comp247698_c0_seq1	len=644	-1.21382	0.0918608	0.0202504	1	NA	NA	NA	NA	NA	NA	NA
comp221028_c0_seq1	len=304	0.983384	0.680135	0.0493848	1	NA	NA	NA	NA	NA	NA	NA
comp202850_c0_seq1	len=281	-1.18006	2.17546	0.0203216	1	NA	NA	NA	NA	NA	NA	NA
comp225884_c1_seq1	len=377	1.09621	1.10359	0.0494033	1	NA	NA	NA	NA	NA	NA	NA
comp261814_c0_seq2	len=2395	-1.05456	1.33177	0.0344978	1	NA	NA	NA	NA	NA	NA	NA
comp252043_c2_seq1	len=306	-2.10106	0.737541	0.0345669	1	NA	NA	NA	NA	NA	NA	NA
comp253389_c0_seq1	len=807	-0.95954	2.20919	0.0346086	1	NA	NA	NA	NA	NA	NA	NA
comp172826_c0_seq1	len=313	1.6078	0.855865	0.0204704	1	NA	NA	NA	NA	NA	NA	NA
comp238883_c1_seq1	len=325	-1.16721	0.293872	0.0300779	1	NA	NA	NA	NA	NA	NA	NA
comp219720_c0_seq1	len=254	-1.21387	1.08725	0.0252005	1	NA	NA	NA	NA	NA	NA	NA
comp245502_c0_seq2	len=931	1.11329	2.11811	0.034744	1	NA	NA	NA	NA	NA	NA	NA
comp217911_c0_seq1	len=261	-1.55532	0.86405	0.0206069	1	NA	NA	NA	NA	NA	NA	NA
comp246287_c1_seq1	len=1083	-0.997341	1.7493	0.0347698	1	NA	NA	NA	NA	NA	NA	NA
comp203638_c0_seq1	len=236	1.13244	0.266289	0.0402489	1	NA	NA	NA	NA	NA	NA	NA
comp250167_c1_seq1	len=367	-1.07418	1.48524	0.020722	1	NA	NA	NA	NA	NA	NA	NA
comp245569_c1_seq1	len=416	-1.17942	3.20743	0.0207882	1	NA	NA	NA	NA	NA	NA	NA
comp237489_c0_seq1	len=670	1.56604	1.86798	0.0350331	1	NA	NA	NA	NA	NA	NA	NA
comp220365_c0_seq1	len=793	-1.86102	1.92625	0.0208844	1	NA	NA	NA	NA	NA	NA	NA
comp249524_c0_seq1	len=560	1.6919	0.866458	0.0210452	1	NA	NA	NA	NA	NA	NA	NA
comp376872_c0_seq1	len=416	-1.75588	0.71321	0.0351633	1	NA	NA	NA	NA	NA	NA	NA
comp251332_c1_seq2	len=622	1.46597	2.82761	0.0351698	1	NA	NA	NA	NA	NA	NA	NA
comp148038_c0_seq1	len=217	-1.15954	0.402057	0.0407634	1	NA	NA	NA	NA	NA	NA	NA
comp260459_c1_seq12	len=2056	-1.02018	1.98217	0.0211614	1	NA	NA	NA	NA	NA	NA	NA
comp254151_c0_seq2	len=1450	1.03446	2.10829	0.0354609	1	NA	NA	NA	NA	NA	NA	NA
comp238355_c1_seq1	len=575	-0.963438	1.0857	0.035464	1	NA	NA	NA	NA	NA	NA	NA
comp237568_c1_seq1	len=397	1.37855	1.05729	0.035517	1	NA	NA	NA	NA	NA	NA	NA
comp238017_c0_seq1	len=551	1.75702	1.23989	0.0212003	1	NA	NA	NA	NA	NA	NA	NA
comp246022_c1_seq2	len=291	1.14762	1.01879	0.0212687	1	NA	NA	NA	NA	NA	NA	NA
comp255294_c1_seq1	len=1208	1.5821	2.52163	0.0212721	1	NA	NA	NA	NA	NA	NA	NA
comp213847_c1_seq1	len=386	1.08166	1.05616	0.0261267	1	NA	NA	NA	NA	NA	NA	NA
comp261712_c4_seq6	len=706	-2.16751	0.648938	0.0307796	1	NA	NA	NA	NA	NA	NA	NA
comp180134_c0_seq1	len=267	1.66296	0.686286	0.0413735	1	NA	NA	NA	NA	NA	NA	NA
comp247187_c0_seq1	len=392	-1.05719	1.28451	0.0414083	1	NA	NA	NA	NA	NA	NA	NA
comp278110_c0_seq1	len=213	-2.00822	4.59703	0.0214634	1	NA	NA	NA	NA	NA	NA	NA
comp157029_c0_seq1	len=247	1.56764	1.90623	0.0357911	1	NA	NA	NA	NA	NA	NA	NA
comp253855_c1_seq1	len=1054	-1.38664	0.596989	0.0265127	1	NA	NA	NA	NA	NA	NA	NA
comp238354_c1_seq1	len=550	1.0451	1.42378	0.0359495	1	NA	NA	NA	NA	NA	NA	NA
comp257028_c0_seq2	len=1345	1.67232	2.3884	0.0216365	1	NA	NA	NA	NA	NA	NA	NA
comp251826_c0_seq1	len=1050	-2.0904	2.77676	0.0360469	1	NA	NA	NA	NA	NA	NA	NA
comp180951_c0_seq1	len=353	1.19073	1.68148	0.0360493	1	NA	NA	NA	NA	NA	NA	NA
comp256351_c0_seq1	len=821	1.1765	1.21646	0.0360656	1	NA	NA	NA	NA	NA	NA	NA
comp204769_c0_seq1	len=505	1.19263	1.07195	0.0361114	1	NA	NA	NA	NA	NA	NA	NA
comp221358_c0_seq1	len=430	1.26051	1.24332	0.0361566	1	NA	NA	NA	NA	NA	NA	NA
comp253306_c1_seq1	len=1071	-1.82992	7.17452	0.0219294	1	NA	NA	NA	NA	NA	NA	NA
comp262437_c6_seq5	len=885	1.46096	1.52902	0.0219559	1	NA	NA	NA	NA	NA	NA	NA
comp259033_c7_seq4	len=332	-1.53213	0.847468	0.0219673	1	NA	NA	NA	NA	NA	NA	NA
comp231402_c1_seq1	len=202	-1.02663	0.404575	0.0362945	1	NA	NA	NA	NA	NA	NA	NA
comp257547_c0_seq10	len=386	-1.35297	1.30146	0.0270094	1	NA	NA	NA	NA	NA	NA	NA
comp226427_c0_seq1	len=617	1.02707	1.54081	0.0362963	1	NA	NA	NA	NA	NA	NA	NA
comp157602_c0_seq1	len=544	1.29861	1.40154	0.0363203	1	NA	NA	NA	NA	NA	NA	NA
comp239186_c0_seq1	len=646	-1.47993	1.49411	0.0222055	1	NA	NA	NA	NA	NA	NA	NA
comp262375_c0_seq19	len=217	1.70997	1.70699	0.0420759	1	NA	NA	NA	NA	NA	NA	NA
comp185780_c0_seq1	len=562	-0.957165	0.815062	0.0365286	1	NA	NA	NA	NA	NA	NA	NA
comp257558_c0_seq1	len=481	-2.44154	3.48501	0.0465576	1	NA	NA	NA	NA	NA	NA	NA
comp208568_c0_seq1	len=442	-1.12624	0.526393	0.0223498	1	NA	NA	NA	NA	NA	NA	NA
comp205065_c0_seq1	len=256	-1.13553	0.583025	0.0224391	1	NA	NA	NA	NA	NA	NA	NA
comp178044_c0_seq1	len=328	1.05489	0.87764	0.0272096	1	NA	NA	NA	NA	NA	NA	NA
comp262068_c3_seq2	len=1957	1.1829	1.44339	0.03661	1	NA	NA	NA	NA	NA	NA	NA
comp221279_c0_seq1	len=296	1.3415	0.691712	0.0367126	1	NA	NA	NA	NA	NA	NA	NA
comp238606_c0_seq1	len=1285	2.36998	1.85235	0.0273845	1	NA	NA	NA	NA	NA	NA	NA
comp154548_c0_seq1	len=1127	1.69609	4.22401	0.0425518	1	NA	NA	NA	NA	NA	NA	NA
comp247604_c1_seq1	len=521	1.21157	0.687841	0.0274961	1	NA	NA	NA	NA	NA	NA	NA
comp179899_c0_seq1	len=250	-1.1562	1.02603	0.0225839	1	NA	NA	NA	NA	NA	NA	NA
comp261914_c2_seq11	len=650	-1.92174	2.24188	0.0225895	1	NA	NA	NA	NA	NA	NA	NA
comp173371_c0_seq1	len=333	-1.11182	0.755704	0.0369746	1	NA	NA	NA	NA	NA	NA	NA
comp260947_c0_seq1	len=281	1.32488	0.925251	0.0277613	1	NA	NA	NA	NA	NA	NA	NA
comp136277_c0_seq1	len=335	-1.86499	1.09124	0.0277985	1	NA	NA	NA	NA	NA	NA	NA
comp262478_c0_seq16	len=209	-1.54495	0.29687	0.0278449	1	NA	NA	NA	NA	NA	NA	NA
comp286479_c0_seq1	len=272	1.79305	1.55341	0.0370922	1	NA	NA	NA	NA	NA	NA	NA
comp230857_c1_seq1	len=261	1.06525	0.807978	0.0229062	1	NA	NA	NA	NA	NA	NA	NA
comp230851_c0_seq1	len=772	1.26501	4.13002	0.027989	1	NA	NA	NA	NA	NA	NA	NA
comp256542_c0_seq11	len=541	-1.83441	1.36883	0.022935	1	NA	NA	NA	NA	NA	NA	NA
comp231155_c1_seq1	len=1171	1.46111	1.97204	0.023024	1	NA	NA	NA	NA	NA	NA	NA
comp238853_c0_seq1	len=1164	-1.16495	2.39237	0.0230631	1	NA	NA	NA	NA	NA	NA	NA
comp240863_c0_seq1	len=380	1.12394	1.00124	0.0230711	1	NA	NA	NA	NA	NA	NA	NA
comp252025_c1_seq3	len=1825	-1.4651	1.99087	0.023093	1	NA	NA	NA	NA	NA	NA	NA
comp247370_c0_seq1	len=795	-1.62584	1.257	0.03245	1	NA	NA	NA	NA	NA	NA	NA
comp251963_c1_seq1	len=316	1.23361	0.622838	0.02311	1	NA	NA	NA	NA	NA	NA	NA
comp168495_c0_seq1	len=234	-1.03816	0.858069	0.0282953	1	NA	NA	NA	NA	NA	NA	NA
comp132429_c0_seq1	len=627	-1.08559	1.41666	0.0375041	1	NA	NA	NA	NA	NA	NA	NA
comp241170_c0_seq2	len=310	1.07497	0.711729	0.0233092	1	NA	NA	NA	NA	NA	NA	NA
comp397764_c0_seq1	len=205	-0.969129	0.333153	0.0375557	1	NA	NA	NA	NA	NA	NA	NA
comp260704_c1_seq1	len=547	-1.20511	0.976952	0.0233781	1	NA	NA	NA	NA	NA	NA	NA
comp222510_c0_seq2	len=342	-0.933164	0.898585	0.0433265	1	NA	NA	NA	NA	NA	NA	NA
comp261350_c1_seq1	len=1334	1.74981	0.559904	0.0381002	1	NA	NA	NA	NA	NA	NA	NA
comp227286_c0_seq1	len=230	1.20077	0.822166	0.0326586	1	NA	NA	NA	NA	NA	NA	NA
comp250311_c2_seq1	len=261	-1.14351	1.42822	0.0285952	1	NA	NA	NA	NA	NA	NA	NA
comp254704_c2_seq3	len=229	-1.36343	2.33886	0.0327268	1	NA	NA	NA	NA	NA	NA	NA
comp240975_c0_seq1	len=269	-1.05895	0.795956	0.023545	1	NA	NA	NA	NA	NA	NA	NA
comp209033_c0_seq1	len=261	1.06601	1.42577	0.0383486	1	NA	NA	NA	NA	NA	NA	NA
comp254743_c1_seq1	len=210	-1.83285	0.958278	0.0383559	1	NA	NA	NA	NA	NA	NA	NA
comp248092_c2_seq1	len=833	-1.2248	2.5723	0.0329039	1	NA	NA	NA	NA	NA	NA	NA
comp214975_c1_seq1	len=274	1.12447	0.339176	0.0329437	1	NA	NA	NA	NA	NA	NA	NA
comp262198_c0_seq15	len=1264	-1.14348	3.65211	0.0236267	1	NA	NA	NA	NA	NA	NA	NA
comp233166_c0_seq1	len=503	-1.02642	3.24351	0.0288389	1	NA	NA	NA	NA	NA	NA	NA
comp244226_c0_seq1	len=764	-1.00984	1.91414	0.023688	1	NA	NA	NA	NA	NA	NA	NA
comp260327_c1_seq2	len=945	-1.20264	3.88499	0.0237189	1	NA	NA	NA	NA	NA	NA	NA
comp261831_c0_seq6	len=829	-0.981104	1.02328	0.0386157	1	NA	NA	NA	NA	NA	NA	NA
comp201836_c0_seq1	len=228	1.29944	0.20453	0.0237574	1	NA	NA	NA	NA	NA	NA	NA
comp255204_c1_seq1	len=313	1.0386	0.841079	0.0386795	1	NA	NA	NA	NA	NA	NA	NA
comp238003_c1_seq1	len=418	1.92407	1.22373	0.0240392	1	NA	NA	NA	NA	NA	NA	NA
comp218045_c0_seq1	len=290	-1.10112	0.497463	0.0387587	1	NA	NA	NA	NA	NA	NA	NA
comp260384_c0_seq2	len=232	-2.66511	3.02857	0.0387695	1	NA	NA	NA	NA	NA	NA	NA
comp177851_c0_seq1	len=544	1.36334	1.00915	0.0242493	1	NA	NA	NA	NA	NA	NA	NA
comp179065_c0_seq1	len=279	1.26747	0.550331	0.0242644	1	NA	NA	NA	NA	NA	NA	NA
comp258971_c0_seq9	len=532	-1.16379	2.47173	0.0243136	1	NA	NA	NA	NA	NA	NA	NA
comp212432_c0_seq1	len=207	-1.39648	-0.239683	0.0243339	1	NA	NA	NA	NA	NA	NA	NA
comp260979_c3_seq10	len=231	-1.4279	0.40471	0.0293704	1	NA	NA	NA	NA	NA	NA	NA
comp258929_c0_seq2	len=1765	-1.34041	0.906616	0.044052	1	NA	NA	NA	NA	NA	NA	NA
comp261944_c0_seq2	len=348	-1.02898	0.756133	0.0244603	1	NA	NA	NA	NA	NA	NA	NA
comp237063_c0_seq1	len=341	1.10264	1.04114	0.0393029	1	NA	NA	NA	NA	NA	NA	NA
comp257588_c0_seq2	len=546	-1.01138	2.5726	0.0295155	1	NA	NA	NA	NA	NA	NA	NA
comp260495_c1_seq20	len=378	-0.946422	1.39391	0.0393333	1	NA	NA	NA	NA	NA	NA	NA
comp193775_c0_seq1	len=588	-2.03024	4.09242	0.0245987	1	NA	NA	NA	NA	NA	NA	NA
comp231563_c0_seq1	len=1381	1.8732	4.66168	0.0246866	1	NA	NA	NA	NA	NA	NA	NA
comp237468_c2_seq1	len=327	1.07981	0.760074	0.0441568	1	NA	NA	NA	NA	NA	NA	NA
comp252746_c1_seq2	len=309	-1.10697	-0.227576	0.029635	1	NA	NA	NA	NA	NA	NA	NA
comp253574_c0_seq1	len=202	-1.05296	0.441183	0.0247452	1	NA	NA	NA	NA	NA	NA	NA
comp246735_c0_seq1	len=473	-0.997361	1.96041	0.0248422	1	NA	NA	NA	NA	NA	NA	NA
comp258047_c3_seq1	len=588	-1.30034	1.92905	0.024875	1	NA	NA	NA	NA	NA	NA	NA
comp217595_c0_seq1	len=374	-0.897015	1.3617	0.0492743	1	NA	NA	NA	NA	NA	NA	NA
comp242537_c0_seq1	len=370	-1.02592	1.57321	0.0397116	1	NA	NA	NA	NA	NA	NA	NA
comp137152_c0_seq1	len=232	-1.01606	0.154802	0.0397435	1	NA	NA	NA	NA	NA	NA	NA
comp138264_c0_seq1	len=826	2.11589	2.14616	0.0250074	1	NA	NA	NA	NA	NA	NA	NA
comp133629_c0_seq1	len=231	-1.25749	-0.0763848	0.0250129	1	NA	NA	NA	NA	NA	NA	NA
comp246252_c2_seq1	len=1596	-1.20048	0.226737	0.025044	1	NA	NA	NA	NA	NA	NA	NA
comp238947_c0_seq1	len=337	1.74064	0.33443	0.0251373	1	NA	NA	NA	NA	NA	NA	NA
comp232857_c0_seq1	len=412	-0.919245	0.604416	0.0399732	1	NA	NA	NA	NA	NA	NA	NA
comp179165_c0_seq1	len=227	-1.06759	0.194865	0.0300485	1	NA	NA	NA	NA	NA	NA	NA
comp217533_c0_seq1	len=715	1.06987	2.046	0.0346765	1	NA	NA	NA	NA	NA	NA	NA
comp238443_c2_seq1	len=397	1.09936	0.531003	0.0346768	1	NA	NA	NA	NA	NA	NA	NA
comp141257_c0_seq1	len=519	1.20101	3.13748	0.0252665	1	NA	NA	NA	NA	NA	NA	NA
comp261666_c8_seq1	len=523	-1.38889	1.2583	0.0252921	1	NA	NA	NA	NA	NA	NA	NA
comp244760_c0_seq1	len=1139	-0.957818	3.48919	0.0402209	1	NA	NA	NA	NA	NA	NA	NA
comp254011_c3_seq2	len=775	1.13474	2.40583	0.0447176	1	NA	NA	NA	NA	NA	NA	NA
comp252446_c0_seq4	len=261	0.979383	1.68337	0.0447445	1	NA	NA	NA	NA	NA	NA	NA
comp229650_c0_seq1	len=334	-1.51053	1.55304	0.0254627	1	NA	NA	NA	NA	NA	NA	NA
comp231432_c0_seq1	len=475	-1.06759	0.647414	0.0348434	1	NA	NA	NA	NA	NA	NA	NA
comp277141_c0_seq1	len=237	1.69986	1.18071	0.0499272	1	NA	NA	NA	NA	NA	NA	NA
comp237709_c0_seq1	len=366	1.11793	0.451708	0.0256061	1	NA	NA	NA	NA	NA	NA	NA
comp243564_c0_seq1	len=476	-1.04704	0.615432	0.0256634	1	NA	NA	NA	NA	NA	NA	NA
comp254041_c4_seq1	len=325	-1.45658	0.832844	0.025696	1	NA	NA	NA	NA	NA	NA	NA
comp258963_c4_seq1	len=738	-1.33179	2.13114	0.044966	1	NA	NA	NA	NA	NA	NA	NA
comp259405_c0_seq2	len=3477	1.26179	3.55188	0.0408075	1	NA	NA	NA	NA	NA	NA	NA
comp257620_c2_seq11	len=1643	1.00434	4.07943	0.0409002	1	NA	NA	NA	NA	NA	NA	NA
comp260769_c1_seq2	len=711	1.02418	2.4887	0.0259164	1	NA	NA	NA	NA	NA	NA	NA
comp260817_c4_seq1	len=467	-1.06361	1.10148	0.025951	1	NA	NA	NA	NA	NA	NA	NA
comp311802_c0_seq1	len=243	-1.31988	0.868674	0.0306893	1	NA	NA	NA	NA	NA	NA	NA
comp238226_c2_seq1	len=315	-1.11636	0.428934	0.026067	1	NA	NA	NA	NA	NA	NA	NA
comp216389_c0_seq2	len=263	0.955062	0.963068	0.0411618	1	NA	NA	NA	NA	NA	NA	NA
comp177514_c0_seq1	len=204	1.48308	0.304049	0.0307394	1	NA	NA	NA	NA	NA	NA	NA
comp261574_c0_seq12	len=669	1.08655	2.38593	0.0412124	1	NA	NA	NA	NA	NA	NA	NA
comp237093_c0_seq1	len=867	-0.970568	1.87951	0.0307802	1	NA	NA	NA	NA	NA	NA	NA
comp264151_c0_seq1	len=240	1.88589	2.9478	0.0453338	1	NA	NA	NA	NA	NA	NA	NA
comp239563_c0_seq2	len=998	-1.61514	1.70686	0.0263094	1	NA	NA	NA	NA	NA	NA	NA
comp257252_c6_seq1	len=221	-0.866009	1.03096	0.0414442	1	NA	NA	NA	NA	NA	NA	NA
comp256370_c2_seq1	len=546	-1.86017	1.64797	0.0308199	1	NA	NA	NA	NA	NA	NA	NA
comp194071_c0_seq1	len=725	1.21332	0.629621	0.0265279	1	NA	NA	NA	NA	NA	NA	NA
comp251857_c1_seq1	len=925	1.71787	-0.336061	0.0265634	1	NA	NA	NA	NA	NA	NA	NA
comp481096_c0_seq1	len=483	1.14739	0.91101	0.0265663	1	NA	NA	NA	NA	NA	NA	NA
comp249995_c0_seq1	len=561	1.38761	1.97255	0.0265819	1	NA	NA	NA	NA	NA	NA	NA
comp228462_c1_seq1	len=224	-0.970393	1.06942	0.0416629	1	NA	NA	NA	NA	NA	NA	NA
comp377632_c0_seq1	len=268	-1.09761	0.378101	0.0267033	1	NA	NA	NA	NA	NA	NA	NA
comp364916_c0_seq1	len=420	-1.75372	1.47218	0.0267663	1	NA	NA	NA	NA	NA	NA	NA
comp259444_c2_seq2	len=238	-1.45486	0.844717	0.0267772	1	NA	NA	NA	NA	NA	NA	NA
comp259754_c1_seq1	len=362	1.07	1.40512	0.0268259	1	NA	NA	NA	NA	NA	NA	NA
comp245967_c0_seq3	len=289	1.1758	0.687922	0.0268645	1	NA	NA	NA	NA	NA	NA	NA
comp258760_c1_seq1	len=496	-1.36075	3.63528	0.0269394	1	NA	NA	NA	NA	NA	NA	NA
comp240773_c1_seq1	len=323	1.45908	0.713125	0.0463014	1	NA	NA	NA	NA	NA	NA	NA
comp242710_c0_seq1	len=340	0.996107	0.343721	0.0419594	1	NA	NA	NA	NA	NA	NA	NA
comp156957_c0_seq1	len=359	-1.15152	0.839626	0.0270407	1	NA	NA	NA	NA	NA	NA	NA
comp213529_c0_seq1	len=297	1.59815	0.889662	0.0420156	1	NA	NA	NA	NA	NA	NA	NA
comp251545_c0_seq2	len=770	1.21872	1.95488	0.0314435	1	NA	NA	NA	NA	NA	NA	NA
comp143884_c0_seq1	len=278	-1.03808	0.158992	0.0420765	1	NA	NA	NA	NA	NA	NA	NA
comp255299_c0_seq2	len=749	1.21509	1.6894	0.0288228	1	NA	NA	NA	NA	NA	NA	NA
comp324059_c0_seq1	len=312	1.97832	1.31278	0.042164	1	NA	NA	NA	NA	NA	NA	NA
comp233224_c0_seq1	len=231	1.0401	0.491949	0.0465783	1	NA	NA	NA	NA	NA	NA	NA
comp467961_c0_seq1	len=284	-1.10308	0.303781	0.0318152	1	NA	NA	NA	NA	NA	NA	NA
comp260227_c1_seq8	len=383	-0.92581	0.920937	0.0423825	1	NA	NA	NA	NA	NA	NA	NA
comp260869_c0_seq1	len=3992	1.424	1.23165	0.031866	1	NA	NA	NA	NA	NA	NA	NA
comp177171_c0_seq1	len=203	0.97119	0.832789	0.0470155	1	NA	NA	NA	NA	NA	NA	NA
comp254415_c0_seq3	len=990	1.04022	1.10718	0.0320047	1	NA	NA	NA	NA	NA	NA	NA
comp253606_c0_seq1	len=1844	-1.27902	1.06743	0.0470199	1	NA	NA	NA	NA	NA	NA	NA
comp250063_c0_seq1	len=991	-1.15228	3.60837	0.0275374	1	NA	NA	NA	NA	NA	NA	NA
comp217410_c1_seq1	len=1479	2.8009	4.3011	0.0276812	1	NA	NA	NA	NA	NA	NA	NA
comp232948_c0_seq1	len=381	-0.963325	0.536171	0.0472563	1	NA	NA	NA	NA	NA	NA	NA
comp235811_c0_seq1	len=338	-0.958756	1.59204	0.0472637	1	NA	NA	NA	NA	NA	NA	NA
comp257676_c2_seq1	len=305	-0.998193	0.694315	0.0321078	1	NA	NA	NA	NA	NA	NA	NA
comp258417_c1_seq1	len=368	1.06622	1.27606	0.0473891	1	NA	NA	NA	NA	NA	NA	NA
comp245120_c0_seq1	len=404	1.07538	2.28005	0.0427183	1	NA	NA	NA	NA	NA	NA	NA
comp262278_c0_seq7	len=829	2.16169	0.144696	0.0279559	1	NA	NA	NA	NA	NA	NA	NA
comp237689_c0_seq1	len=551	-0.947805	1.52991	0.0427424	1	NA	NA	NA	NA	NA	NA	NA
comp239937_c0_seq1	len=666	-1.32455	0.0123019	0.0427533	1	NA	NA	NA	NA	NA	NA	NA
comp222675_c0_seq1	len=319	1.13592	0.995693	0.0428437	1	NA	NA	NA	NA	NA	NA	NA
comp254976_c2_seq1	len=526	1.18988	1.27756	0.0323665	1	NA	NA	NA	NA	NA	NA	NA
comp235205_c1_seq1	len=388	1.07529	1.0186	0.0281154	1	NA	NA	NA	NA	NA	NA	NA
comp240823_c0_seq1	len=416	1.22645	0.319138	0.0281819	1	NA	NA	NA	NA	NA	NA	NA
comp248005_c0_seq1	len=513	1.18516	1.39985	0.0373731	1	NA	NA	NA	NA	NA	NA	NA
comp242001_c1_seq1	len=291	-0.915766	0.555223	0.0430766	1	NA	NA	NA	NA	NA	NA	NA
comp247296_c0_seq1	len=393	-0.950226	0.435886	0.0374106	1	NA	NA	NA	NA	NA	NA	NA
comp215603_c0_seq1	len=304	-1.24622	0.0880919	0.0431511	1	NA	NA	NA	NA	NA	NA	NA
comp155673_c0_seq1	len=606	2.3582	1.80977	0.0478723	1	NA	NA	NA	NA	NA	NA	NA
comp261381_c0_seq2	len=2935	-1.17444	4.23151	0.0342576	1	NA	NA	NA	NA	NA	NA	NA
comp251879_c0_seq1	len=810	-1.3448	1.59196	0.0433191	1	NA	NA	NA	NA	NA	NA	NA
comp210407_c0_seq1	len=223	1.55618	1.53493	0.0325636	1	NA	NA	NA	NA	NA	NA	NA
comp276013_c0_seq1	len=381	1.90845	2.38444	0.0433319	1	NA	NA	NA	NA	NA	NA	NA
comp222593_c0_seq1	len=382	1.14553	0.658652	0.029987	1	NA	NA	NA	NA	NA	NA	NA
comp180893_c0_seq1	len=242	-1.42382	0.835334	0.0300186	1	NA	NA	NA	NA	NA	NA	NA
comp248139_c2_seq1	len=301	-1.0131	1.71967	0.0433687	1	NA	NA	NA	NA	NA	NA	NA
comp231425_c1_seq1	len=486	-1.01781	0.582178	0.0327382	1	NA	NA	NA	NA	NA	NA	NA
comp261586_c1_seq26	len=311	-1.01532	1.13588	0.0434586	1	NA	NA	NA	NA	NA	NA	NA
comp259071_c0_seq4	len=1178	-1.03039	1.44739	0.0435746	1	NA	NA	NA	NA	NA	NA	NA
comp251551_c1_seq1	len=224	-1.10193	0.730515	0.0347199	1	NA	NA	NA	NA	NA	NA	NA
comp253818_c0_seq4	len=342	1.28201	1.21595	0.0484179	1	NA	NA	NA	NA	NA	NA	NA
comp347966_c0_seq1	len=229	1.02989	1.39828	0.0446903	1	NA	NA	NA	NA	NA	NA	NA
comp230764_c0_seq2	len=292	1.07384	4.76181	0.0436655	1	NA	NA	NA	NA	NA	NA	NA
comp244408_c0_seq1	len=979	1.29436	0.864145	0.028883	1	NA	NA	NA	NA	NA	NA	NA
comp230571_c1_seq1	len=1142	-1.61654	2.62875	0.0384644	1	NA	NA	NA	NA	NA	NA	NA
comp246762_c0_seq1	len=424	1.00718	1.68112	0.0437943	1	NA	NA	NA	NA	NA	NA	NA
comp211992_c0_seq1	len=321	-1.0111	0.719272	0.0438137	1	NA	NA	NA	NA	NA	NA	NA
comp245037_c0_seq1	len=339	1.68957	1.06815	0.0289706	1	NA	NA	NA	NA	NA	NA	NA
comp257470_c3_seq6	len=1012	1.88768	1.69405	0.0333131	1	NA	NA	NA	NA	NA	NA	NA
comp139967_c0_seq1	len=447	1.37424	1.4613	0.0438887	1	NA	NA	NA	NA	NA	NA	NA
comp247589_c1_seq1	len=246	1.27166	0.825911	0.0439224	1	NA	NA	NA	NA	NA	NA	NA
comp222993_c0_seq1	len=308	-1.13356	0.984278	0.0333542	1	NA	NA	NA	NA	NA	NA	NA
comp255539_c1_seq1	len=244	1.20995	0.695857	0.0439552	1	NA	NA	NA	NA	NA	NA	NA
comp262445_c5_seq1	len=276	-0.990888	0.963365	0.0292687	1	NA	NA	NA	NA	NA	NA	NA
comp262375_c0_seq23	len=202	1.50742	0.656045	0.0440403	1	NA	NA	NA	NA	NA	NA	NA
comp258757_c0_seq2	len=495	-0.985947	1.74925	0.0390705	1	NA	NA	NA	NA	NA	NA	NA
comp201541_c0_seq1	len=423	-1.07336	0.94588	0.0427075	1	NA	NA	NA	NA	NA	NA	NA
comp245317_c0_seq2	len=333	1.47152	1.05254	0.0440983	1	NA	NA	NA	NA	NA	NA	NA
comp214135_c0_seq1	len=332	-0.984323	0.436587	0.044117	1	NA	NA	NA	NA	NA	NA	NA
comp261640_c0_seq5	len=1033	-1.59765	1.57315	0.033869	1	NA	NA	NA	NA	NA	NA	NA
comp260055_c5_seq13	len=432	1.28957	1.20982	0.0441319	1	NA	NA	NA	NA	NA	NA	NA
comp236136_c0_seq1	len=353	-1.06891	1.30456	0.0295554	1	NA	NA	NA	NA	NA	NA	NA
comp237849_c2_seq1	len=362	-1.04998	2.47543	0.0295676	1	NA	NA	NA	NA	NA	NA	NA
comp234916_c0_seq1	len=241	-1.04116	0.46851	0.0491575	1	NA	NA	NA	NA	NA	NA	NA
comp220955_c0_seq1	len=470	-0.975078	3.92579	0.0341078	1	NA	NA	NA	NA	NA	NA	NA
comp256879_c0_seq3	len=525	-1.09894	0.0053886	0.0441706	1	NA	NA	NA	NA	NA	NA	NA
comp257475_c1_seq1	len=360	-1.62641	-0.0467711	0.044182	1	NA	NA	NA	NA	NA	NA	NA
comp223075_c0_seq1	len=431	1.02792	0.913844	0.0297713	1	NA	NA	NA	NA	NA	NA	NA
comp240999_c0_seq6	len=2852	2.17292	5.05839	0.0396465	1	NA	NA	NA	NA	NA	NA	NA
comp253337_c0_seq2	len=318	1.11142	0.87453	0.0458407	1	NA	NA	NA	NA	NA	NA	NA
comp405276_c0_seq1	len=713	-1.2273	1.4687	0.0442783	1	NA	NA	NA	NA	NA	NA	NA
comp246582_c2_seq1	len=698	1.54988	3.18052	0.0299448	1	NA	NA	NA	NA	NA	NA	NA
comp250587_c0_seq2	len=1014	2.44143	0.915877	0.0299711	1	NA	NA	NA	NA	NA	NA	NA
comp237974_c0_seq1	len=1243	1.42648	4.18605	0.0460746	1	NA	NA	NA	NA	NA	NA	NA
comp209474_c1_seq1	len=431	1.12728	0.287622	0.0362589	1	NA	NA	NA	NA	NA	NA	NA
comp258063_c2_seq5	len=250	-1.36617	1.72056	0.0445207	1	NA	NA	NA	NA	NA	NA	NA
comp216813_c1_seq1	len=263	1.6232	1.85587	0.0494461	1	NA	NA	NA	NA	NA	NA	NA
comp223714_c0_seq1	len=231	1.03038	0.64052	0.0445279	1	NA	NA	NA	NA	NA	NA	NA
comp247741_c1_seq2	len=367	1.04666	1.53872	0.0445485	1	NA	NA	NA	NA	NA	NA	NA
comp256740_c3_seq5	len=519	-1.00947	0.904454	0.0419758	1	NA	NA	NA	NA	NA	NA	NA
comp232377_c1_seq1	len=406	0.988501	0.90597	0.0301929	1	NA	NA	NA	NA	NA	NA	NA
comp138780_c1_seq1	len=318	1.35073	0.565661	0.0464101	1	NA	NA	NA	NA	NA	NA	NA
comp177015_c0_seq1	len=237	-0.866993	0.948098	0.0496173	1	NA	NA	NA	NA	NA	NA	NA
comp241657_c0_seq1	len=451	1.0031	0.972582	0.0496363	1	NA	NA	NA	NA	NA	NA	NA
comp164015_c0_seq1	len=346	-1.30989	1.73875	0.0302391	1	NA	NA	NA	NA	NA	NA	NA
comp249578_c1_seq1	len=771	-2.46875	1.59102	0.0405428	1	NA	NA	NA	NA	NA	NA	NA
comp178790_c0_seq1	len=451	1.00661	0.859956	0.0497932	1	NA	NA	NA	NA	NA	NA	NA
comp237426_c0_seq1	len=325	1.58439	1.96175	0.0350822	1	NA	NA	NA	NA	NA	NA	NA
comp262068_c2_seq1	len=417	1.00007	0.978808	0.0449424	1	NA	NA	NA	NA	NA	NA	NA
comp239431_c0_seq1	len=522	1.86844	1.39583	0.0303655	1	NA	NA	NA	NA	NA	NA	NA
comp270594_c0_seq1	len=339	1.07	2.88666	0.0486709	1	NA	NA	NA	NA	NA	NA	NA
comp258809_c3_seq1	len=242	1.16896	0.417733	0.0407781	1	NA	NA	NA	NA	NA	NA	NA
comp257291_c3_seq2	len=628	-1.18069	0.961583	0.0450972	1	NA	NA	NA	NA	NA	NA	NA
comp239085_c1_seq1	len=434	-0.946755	1.93124	0.0451094	1	NA	NA	NA	NA	NA	NA	NA
comp217484_c0_seq1	len=230	1.55783	1.17251	0.0409746	1	NA	NA	NA	NA	NA	NA	NA
comp251890_c0_seq1	len=891	1.27589	1.29673	0.0410464	1	NA	NA	NA	NA	NA	NA	NA
comp256614_c0_seq2	len=587	1.10131	1.45886	0.0439993	1	NA	NA	NA	NA	NA	NA	NA
comp248234_c0_seq2	len=364	-0.966181	1.05576	0.0452683	1	NA	NA	NA	NA	NA	NA	NA
comp234091_c0_seq1	len=349	1.11172	0.105004	0.0355936	1	NA	NA	NA	NA	NA	NA	NA
comp252043_c3_seq1	len=367	1.23604	1.24466	0.045271	1	NA	NA	NA	NA	NA	NA	NA
comp246583_c0_seq1	len=396	-1.19605	0.901325	0.0452717	1	NA	NA	NA	NA	NA	NA	NA
comp259847_c0_seq1	len=829	1.1296	1.78067	0.0356905	1	NA	NA	NA	NA	NA	NA	NA
comp254743_c0_seq11	len=877	1.79792	2.12848	0.0307937	1	NA	NA	NA	NA	NA	NA	NA
comp245639_c0_seq8	len=655	1.16638	0.374178	0.0323859	1	NA	NA	NA	NA	NA	NA	NA
comp157234_c0_seq1	len=240	-1.132	5.86815	0.0372847	1	NA	NA	NA	NA	NA	NA	NA
comp253964_c2_seq1	len=775	1.8616	2.22362	0.0454948	1	NA	NA	NA	NA	NA	NA	NA
comp230713_c1_seq1	len=820	1.18606	1.61168	0.0308515	1	NA	NA	NA	NA	NA	NA	NA
comp195737_c0_seq1	len=498	-1.04642	2.34159	0.0458207	1	NA	NA	NA	NA	NA	NA	NA
comp258654_c0_seq1	len=1815	-1.19455	-0.0488615	0.0309824	1	NA	NA	NA	NA	NA	NA	NA
comp233837_c1_seq1	len=310	0.97716	0.584301	0.0442236	1	NA	NA	NA	NA	NA	NA	NA
comp253004_c0_seq1	len=1348	1.43153	0.680871	0.0310567	1	NA	NA	NA	NA	NA	NA	NA
comp142266_c0_seq1	len=284	1.16451	1.0348	0.0417905	1	NA	NA	NA	NA	NA	NA	NA
comp262355_c4_seq11	len=1626	-1.24744	1.47711	0.0417938	1	NA	NA	NA	NA	NA	NA	NA
comp247299_c1_seq1	len=209	-0.998824	0.442042	0.0479976	1	NA	NA	NA	NA	NA	NA	NA
comp256993_c1_seq15	len=307	1.15099	1.86738	0.0397484	1	NA	NA	NA	NA	NA	NA	NA
comp260241_c6_seq1	len=788	-1.06721	2.96844	0.0312762	1	NA	NA	NA	NA	NA	NA	NA
comp261270_c4_seq1	len=357	1.3431	1.34835	0.0419546	1	NA	NA	NA	NA	NA	NA	NA
comp255907_c1_seq3	len=865	-1.20077	3.01702	0.0481717	1	NA	NA	NA	NA	NA	NA	NA
comp240479_c0_seq1	len=466	1.15421	0.395767	0.0463216	1	NA	NA	NA	NA	NA	NA	NA
comp215311_c1_seq1	len=350	1.01207	0.404719	0.048412	1	NA	NA	NA	NA	NA	NA	NA
comp245951_c0_seq1	len=644	-1.37213	2.45219	0.0364573	1	NA	NA	NA	NA	NA	NA	NA
comp238534_c0_seq1	len=454	-1.00959	1.32549	0.0334811	1	NA	NA	NA	NA	NA	NA	NA
comp265821_c0_seq1	len=255	1.08391	1.85339	0.0484654	1	NA	NA	NA	NA	NA	NA	NA
comp259282_c3_seq1	len=980	1.10795	2.46964	0.0465628	1	NA	NA	NA	NA	NA	NA	NA
comp206574_c0_seq1	len=252	-1.05736	1.03978	0.0436892	1	NA	NA	NA	NA	NA	NA	NA
comp261803_c0_seq1	len=275	-1.04573	1.49003	0.0436904	1	NA	NA	NA	NA	NA	NA	NA
comp261004_c0_seq1	len=366	1.21958	1.30706	0.0318541	1	NA	NA	NA	NA	NA	NA	NA
comp244907_c1_seq1	len=499	-0.912612	1.90454	0.0467672	1	NA	NA	NA	NA	NA	NA	NA
comp233509_c0_seq2	len=401	1.17374	2.25871	0.0468857	1	NA	NA	NA	NA	NA	NA	NA
comp220962_c0_seq1	len=314	1.03029	0.463373	0.0367144	1	NA	NA	NA	NA	NA	NA	NA
comp202263_c0_seq1	len=226	-1.19455	0.191011	0.040713	1	NA	NA	NA	NA	NA	NA	NA
comp220684_c1_seq1	len=343	1.41917	0.364019	0.0320911	1	NA	NA	NA	NA	NA	NA	NA
comp226662_c0_seq1	len=249	1.59576	0.962841	0.0320963	1	NA	NA	NA	NA	NA	NA	NA
comp239030_c0_seq1	len=804	-1.12863	0.573079	0.0368712	1	NA	NA	NA	NA	NA	NA	NA
comp262417_c1_seq1	len=272	0.959373	0.595357	0.0396058	1	NA	NA	NA	NA	NA	NA	NA
comp258575_c0_seq6	len=525	-1.07338	1.80107	0.0426913	1	NA	NA	NA	NA	NA	NA	NA
comp256359_c6_seq7	len=222	0.915498	1.9748	0.0487444	1	NA	NA	NA	NA	NA	NA	NA
comp241409_c0_seq1	len=341	-1.11878	0.107983	0.0475967	1	NA	NA	NA	NA	NA	NA	NA
comp259147_c2_seq3	len=644	-1.19715	1.56728	0.0476207	1	NA	NA	NA	NA	NA	NA	NA
comp225374_c0_seq2	len=262	-0.947354	0.672293	0.0392585	1	NA	NA	NA	NA	NA	NA	NA
comp235527_c1_seq1	len=226	1.38602	0.724937	0.0493856	1	NA	NA	NA	NA	NA	NA	NA
comp152867_c0_seq1	len=241	1.15324	0.984379	0.0372053	1	NA	NA	NA	NA	NA	NA	NA
comp256718_c3_seq1	len=379	-2.25483	1.03702	0.0372216	1	NA	NA	NA	NA	NA	NA	NA
comp257284_c0_seq1	len=714	-1.58826	0.515411	0.0393409	1	NA	NA	NA	NA	NA	NA	NA
comp221929_c0_seq1	len=725	2.13153	1.67435	0.0393465	1	NA	NA	NA	NA	NA	NA	NA
comp247656_c0_seq2	len=1381	1.4794	0.737207	0.0429047	1	NA	NA	NA	NA	NA	NA	NA
comp253943_c0_seq1	len=838	-1.65845	5.18944	0.0374074	1	NA	NA	NA	NA	NA	NA	NA
comp244296_c0_seq2	len=563	-1.41916	2.96167	0.0401492	1	NA	NA	NA	NA	NA	NA	NA
comp237555_c0_seq1	len=282	1.08445	0.760171	0.0478634	1	NA	NA	NA	NA	NA	NA	NA
comp254743_c0_seq3	len=779	-1.65412	1.65102	0.0430995	1	NA	NA	NA	NA	NA	NA	NA
comp261139_c0_seq8	len=414	1.19415	2.37212	0.044227	1	NA	NA	NA	NA	NA	NA	NA
comp252295_c0_seq2	len=428	-0.890178	2.23226	0.0479927	1	NA	NA	NA	NA	NA	NA	NA
comp245517_c0_seq1	len=1161	1.27654	2.89624	0.0379148	1	NA	NA	NA	NA	NA	NA	NA
comp262021_c2_seq1	len=486	1.92771	0.791641	0.0330814	1	NA	NA	NA	NA	NA	NA	NA
comp233151_c1_seq1	len=233	-1.04443	0.947002	0.0418173	1	NA	NA	NA	NA	NA	NA	NA
comp177926_c0_seq1	len=421	-1.27552	1.94876	0.0494218	1	NA	NA	NA	NA	NA	NA	NA
comp246959_c0_seq1	len=285	-0.925319	0.90903	0.0494374	1	NA	NA	NA	NA	NA	NA	NA
comp238477_c0_seq1	len=358	0.99266	1.62755	0.0462665	1	NA	NA	NA	NA	NA	NA	NA
comp217010_c0_seq1	len=471	1.26796	2.31747	0.0327863	1	NA	NA	NA	NA	NA	NA	NA
comp217285_c2_seq1	len=305	1.72435	1.35872	0.0494489	1	NA	NA	NA	NA	NA	NA	NA
comp255136_c1_seq1	len=290	-1.14613	0.426043	0.0334522	1	NA	NA	NA	NA	NA	NA	NA
comp259874_c2_seq2	len=288	-1.15753	2.23106	0.0471588	1	NA	NA	NA	NA	NA	NA	NA
comp217167_c1_seq1	len=224	1.09515	0.645636	0.0347582	1	NA	NA	NA	NA	NA	NA	NA
comp220801_c0_seq1	len=365	-1.61168	0.712408	0.0495983	1	NA	NA	NA	NA	NA	NA	NA
comp234912_c0_seq1	len=328	1.14105	0.70609	0.0446836	1	NA	NA	NA	NA	NA	NA	NA
comp240131_c0_seq2	len=548	1.7868	0.492386	0.0348351	1	NA	NA	NA	NA	NA	NA	NA
comp172485_c0_seq1	len=262	-0.95748	0.860825	0.0411275	1	NA	NA	NA	NA	NA	NA	NA
comp149637_c0_seq1	len=304	-1.02442	2.20256	0.0486506	1	NA	NA	NA	NA	NA	NA	NA
comp257078_c0_seq1	len=252	-1.24191	1.15566	0.0333091	1	NA	NA	NA	NA	NA	NA	NA
comp259519_c3_seq14	len=603	-1.67688	1.98964	0.0438283	1	NA	NA	NA	NA	NA	NA	NA
comp334187_c0_seq1	len=217	2.07063	0.411527	0.0406346	1	NA	NA	NA	NA	NA	NA	NA
comp200170_c0_seq1	len=245	-1.36003	0.0165428	0.0486857	1	NA	NA	NA	NA	NA	NA	NA
comp221112_c0_seq1	len=346	1.06057	0.570573	0.042587	1	NA	NA	NA	NA	NA	NA	NA
comp262493_c0_seq28	len=485	1.88684	1.17142	0.0341715	1	NA	NA	NA	NA	NA	NA	NA
comp250135_c0_seq2	len=801	-1.47822	1.52458	0.0415127	1	NA	NA	NA	NA	NA	NA	NA
comp204511_c0_seq1	len=359	-1.04584	0.867492	0.0488446	1	NA	NA	NA	NA	NA	NA	NA
comp256926_c0_seq3	len=243	2.51996	2.34773	0.0415137	1	NA	NA	NA	NA	NA	NA	NA
comp255103_c1_seq1	len=424	1.06537	0.573449	0.0487971	1	NA	NA	NA	NA	NA	NA	NA
comp256800_c1_seq1	len=487	1.13237	0.838479	0.039178	1	NA	NA	NA	NA	NA	NA	NA
comp175946_c0_seq1	len=277	-0.957972	0.911714	0.0493266	1	NA	NA	NA	NA	NA	NA	NA
comp230082_c1_seq1	len=458	-1.15717	-0.153286	0.0447704	1	NA	NA	NA	NA	NA	NA	NA
comp245682_c1_seq1	len=299	-1.0928	0.299205	0.0490461	1	NA	NA	NA	NA	NA	NA	NA
comp255653_c2_seq1	len=240	0.963352	1.21836	0.0491454	1	NA	NA	NA	NA	NA	NA	NA
comp158361_c1_seq1	len=251	1.49194	0.974517	0.04903	1	NA	NA	NA	NA	NA	NA	NA
comp205448_c0_seq1	len=363	-1.09544	0.608917	0.0372359	1	NA	NA	NA	NA	NA	NA	NA
comp244547_c2_seq1	len=340	-0.955461	1.27068	0.0428789	1	NA	NA	NA	NA	NA	NA	NA
comp389216_c0_seq1	len=342	-1.0122	0.563302	0.0382499	1	NA	NA	NA	NA	NA	NA	NA
comp217436_c0_seq1	len=372	-1.20736	2.99078	0.0482661	1	NA	NA	NA	NA	NA	NA	NA
comp249441_c1_seq2	len=442	-0.974529	0.53064	0.0396131	1	NA	NA	NA	NA	NA	NA	NA
comp173836_c0_seq1	len=303	-0.950305	1.24151	0.0463871	1	NA	NA	NA	NA	NA	NA	NA
comp270717_c0_seq1	len=211	-1.08808	1.61936	0.0456373	1	NA	NA	NA	NA	NA	NA	NA
comp239722_c0_seq1	len=444	-0.976292	0.633371	0.0493798	1	NA	NA	NA	NA	NA	NA	NA
comp212017_c0_seq1	len=332	0.95054	2.40173	0.0355661	1	NA	NA	NA	NA	NA	NA	NA
comp200543_c0_seq2	len=270	-1.79792	0.93327	0.0397741	1	NA	NA	NA	NA	NA	NA	NA
comp259610_c0_seq3	len=1372	1.39271	0.485267	0.0397461	1	NA	NA	NA	NA	NA	NA	NA
comp231736_c1_seq1	len=397	-1.03017	0.474406	0.0418982	1	NA	NA	NA	NA	NA	NA	NA
comp225080_c0_seq1	len=373	-1.14041	1.77338	0.0362746	1	NA	NA	NA	NA	NA	NA	NA
comp233495_c0_seq1	len=532	-1.1412	3.57611	0.0387837	1	NA	NA	NA	NA	NA	NA	NA
comp250245_c0_seq3	len=1475	-1.3335	1.46983	0.0444009	1	NA	NA	NA	NA	NA	NA	NA
comp229991_c0_seq1	len=400	1.15211	0.173346	0.0441539	1	NA	NA	NA	NA	NA	NA	NA
comp178148_c0_seq1	len=498	1.40536	2.22978	0.0367822	1	NA	NA	NA	NA	NA	NA	NA
comp221932_c0_seq1	len=392	1.23783	0.919213	0.0350872	1	NA	NA	NA	NA	NA	NA	NA
comp240148_c0_seq1	len=345	1.46636	2.4712	0.0389351	1	NA	NA	NA	NA	NA	NA	NA
comp314313_c0_seq1	len=377	-2.14716	1.02448	0.0402138	1	NA	NA	NA	NA	NA	NA	NA
comp261292_c1_seq1	len=540	-1.11759	1.59009	0.0471531	1	NA	NA	NA	NA	NA	NA	NA
comp232827_c2_seq1	len=340	-1.00136	0.698878	0.0414892	1	NA	NA	NA	NA	NA	NA	NA
comp278276_c0_seq1	len=636	1.7552	3.09108	0.0397552	1	NA	NA	NA	NA	NA	NA	NA
comp218506_c0_seq1	len=268	-1.00427	0.583085	0.0423585	1	NA	NA	NA	NA	NA	NA	NA
comp257098_c5_seq24	len=313	-1.09011	1.45567	0.0384738	1	NA	NA	NA	NA	NA	NA	NA
comp261567_c0_seq1	len=932	1.50418	2.43672	0.0443682	1	NA	NA	NA	NA	NA	NA	NA
comp247001_c0_seq3	len=239	1.16279	1.47082	0.0491745	1	NA	NA	NA	NA	NA	NA	NA
comp230535_c0_seq1	len=558	1.07994	1.65613	0.0499967	1	NA	NA	NA	NA	NA	NA	NA
comp245073_c1_seq2	len=540	1.02273	0.372464	0.0499376	1	NA	NA	NA	NA	NA	NA	NA
comp197878_c0_seq1	len=734	1.03394	2.47523	0.049189	1	NA	NA	NA	NA	NA	NA	NA
comp238807_c0_seq1	len=510	1.10921	4.29976	0.0453288	1	NA	NA	NA	NA	NA	NA	NA
comp553168_c0_seq1	len=569	-0.948944	0.591093	0.035963	1	NA	NA	NA	NA	NA	NA	NA
comp242756_c1_seq1	len=257	-0.95462	1.05947	0.0487395	1	NA	NA	NA	NA	NA	NA	NA
comp302414_c0_seq1	len=224	1.27672	1.50797	0.0419179	1	NA	NA	NA	NA	NA	NA	NA
comp247589_c0_seq1	len=238	1.04545	0.714989	0.0476657	1	NA	NA	NA	NA	NA	NA	NA
comp248712_c1_seq3	len=663	1.0763	1.4581	0.0386522	1	NA	NA	NA	NA	NA	NA	NA
comp261930_c1_seq1	len=408	-1.11951	1.41859	0.0441478	1	NA	NA	NA	NA	NA	NA	NA
comp239345_c0_seq1	len=248	2.14461	4.41589	0.0443345	1	NA	NA	NA	NA	NA	NA	NA
comp356917_c0_seq1	len=225	1.32228	0.313654	0.0482545	1	NA	NA	NA	NA	NA	NA	NA
comp247974_c0_seq1	len=266	1.01055	0.899077	0.042591	1	NA	NA	NA	NA	NA	NA	NA
comp247143_c2_seq2	len=456	-1.46608	0.827127	0.0443384	1	NA	NA	NA	NA	NA	NA	NA
comp257934_c1_seq3	len=942	1.03117	3.03328	0.0441206	1	NA	NA	NA	NA	NA	NA	NA
comp244340_c2_seq1	len=258	1.03356	0.524312	0.0476808	1	NA	NA	NA	NA	NA	NA	NA
comp254446_c2_seq1	len=333	-0.924426	1.42871	0.049701	1	NA	NA	NA	NA	NA	NA	NA

## Sheet: Zn NPs vs control
gene	length	logFC	logCPM	PValue	FDR	HitName	HitDesc	HitSignif	HSP_rank	X,ID	eValue	HSP_length
comp249852_c1_seq3	len=971	8.00099	2.55052	2.04e-24	5.64e-20	sp|Q9V730|EXT1_DROME	Exostosin-1 OS=Drosophila melanogaster GN=ttv PE=1 SV=1	3e-20	1	32.5843	3e-20	178
comp261791_c0_seq3	len=274	8.5929	0.198672	8.52e-17	7.85e-13	sp|Q14315|FLNC_HUMAN	Filamin-C OS=Homo sapiens GN=FLNC PE=1 SV=3	2e-09	1	38.0282	2e-09	71
comp260819_c0_seq2	len=3855	9.87982	4.00049	3.82e-14	2.11e-10	sp|P11940|PABP1_HUMAN	Polyadenylate-binding protein 1 OS=Homo sapiens GN=PABPC1 PE=1 SV=2	0	1	65.1757	0	626
comp217491_c1_seq1	len=854	-9.56239	2.71792	1.63e-13	6.93e-10	sp|P42519|STAR_DROME	Protein Star OS=Drosophila melanogaster GN=S PE=2 SV=1	4e-11	1	33.6364	4e-11	110
comp231300_c0_seq2	len=726	-4.46921	1.24543	1.29e-10	2.46e-07	sp|Q6PEH9|S39AA_DANRE	Zinc transporter ZIP10 OS=Danio rerio GN=slc39a10 PE=2 SV=1	2e-44	1	49.6855	2e-44	159
comp257997_c0_seq2	len=1126	8.93527	1.15965	1.56e-10	2.77e-07	sp|Q9C040|TRIM2_HUMAN	Tripartite motif-containing protein 2 OS=Homo sapiens GN=TRIM2 PE=1 SV=1	3e-08	1	27.1084	3e-08	166
comp256065_c0_seq1	len=1914	-7.45683	0.170636	2.24e-10	3.65e-07	sp|Q54RP0|AGTA_DICDI	UDP-galactose:fucoside alpha-3-galactosyltransferase OS=Dictyostelium discoideum GN=agtA PE=1 SV=1	4e-11	1	28.1407	4e-11	199
comp281300_c0_seq1	len=525	6.74518	2.37013	1.07e-09	1.51e-06	sp|P80192|M3K9_HUMAN	Mitogen-activated protein kinase kinase kinase 9 OS=Homo sapiens GN=MAP3K9 PE=1 SV=3	3e-21	1	37.5	3e-21	144
comp260028_c0_seq4	len=2643	6.19498	1.15241	1.89e-09	2.56e-06	sp|Q9WVE8|PACN2_MOUSE	Protein kinase C and casein kinase substrate in neurons protein 2 OS=Mus musculus GN=Pacsin2 PE=1 SV=1	1e-91	1	34.8643	1e-91	479
comp239138_c0_seq1	len=1035	5.85063	1.36468	2.86e-09	3.68e-06	sp|Q21974|UNC8_CAEEL	Degenerin unc-8 OS=Caenorhabditis elegans GN=unc-8 PE=2 SV=1	7e-24	1	32.5472	7e-24	212
comp262514_c0_seq1	len=4423	7.89242	1.24277	8.21e-09	9.27e-06	sp|P35580|MYH10_HUMAN	Myosin-10 OS=Homo sapiens GN=MYH10 PE=1 SV=3	0	1	57.8001	0	1391
comp216531_c0_seq2	len=869	-7.35011	0.486936	3.95e-08	3.97e-05	sp|P05434|CATR_CHLRE	Caltractin OS=Chlamydomonas reinhardtii PE=1 SV=1	4e-07	1	41.5584	4e-07	77
comp262136_c0_seq2	len=4736	5.3108	1.04862	4.16e-08	4.11e-05	sp|Q91VE0|S27A4_MOUSE	Long-chain fatty acid transport protein 4 OS=Mus musculus GN=Slc27a4 PE=1 SV=1	0	1	49.6914	0	648
comp150729_c0_seq1	len=2715	-6.8849	6.62094	1.75e-07	0.000152117	sp|Q03185|TS11_GIAIN	Major surface trophozoite antigen 11 OS=Giardia intestinalis GN=TSP11 PE=3 SV=1	1e-28	1	28.7356	1e-28	435
comp262123_c3_seq1	len=791	6.11106	3.57584	2.21e-07	0.000185069	sp|Q2KHU5|MACD1_BOVIN	O-acetyl-ADP-ribose deacetylase MACROD1 OS=Bos taurus GN=MACROD1 PE=2 SV=1	8e-25	1	44.4444	8e-25	126
comp248483_c0_seq15	len=230	7.80965	-0.00795646	2.29e-07	0.000188945	sp|Q8TDY8|IGDC4_HUMAN	Immunoglobulin superfamily DCC subclass member 4 OS=Homo sapiens GN=IGDCC4 PE=1 SV=1	2e-09	1	36.4865	2e-09	74
comp262123_c1_seq15	len=1823	5.4616	3.63913	2.57e-07	0.000202965	sp|Q3UYG8|MACD2_MOUSE	O-acetyl-ADP-ribose deacetylase MACROD2 OS=Mus musculus GN=Macrod2 PE=2 SV=1	3e-15	1	41.0714	3e-15	112
comp237505_c3_seq2	len=2064	-5.58676	4.96789	1.04e-06	0.000680442	sp|Q9D733|GP2_MOUSE	Pancreatic secretory granule membrane major glycoprotein GP2 OS=Mus musculus GN=Gp2 PE=2 SV=3	5e-19	1	35.5072	5e-19	138
comp260621_c1_seq1	len=2092	2.86552	3.73164	1.17e-06	0.000746925	sp|P35316|ATC_ARTSF	Calcium-transporting ATPase sarcoplasmic/endoplasmic reticulum type OS=Artemia franciscana PE=2 SV=1	6e-98	1	70.4348	6e-98	230
comp260629_c0_seq1	len=2676	-4.36745	0.41703	9.28e-06	0.00406933	sp|O35136|NCAM2_MOUSE	Neural cell adhesion molecule 2 OS=Mus musculus GN=Ncam2 PE=1 SV=1	2e-06	1	22.1429	2e-06	280
comp255528_c2_seq4	len=266	-3.58455	1.32253	1.56e-05	0.00642937	sp|P83039|ICHY_CAIMO	Chymotrypsin inhibitor OS=Cairina moschata PE=1 SV=1	3e-12	1	52.1739	3e-12	46
comp262159_c0_seq1	len=3492	3.16338	0.0280831	1.97e-05	0.00772503	sp|Q13627|DYR1A_HUMAN	Dual specificity tyrosine-phosphorylation-regulated kinase 1A OS=Homo sapiens GN=DYRK1A PE=1 SV=2	0	1	73.3831	0	402
comp233101_c0_seq1	len=553	2.71101	1.07878	2.1e-05	0.00808299	sp|Q5RD31|NQO1_PONAB	NAD(P)H dehydrogenase [quinone] 1 OS=Pongo abelii GN=NQO1 PE=2 SV=1	1e-14	1	33.0769	1e-14	130
comp261694_c1_seq6	len=444	3.62313	1.25965	2.52e-05	0.00928671	sp|Q02779|M3K10_HUMAN	Mitogen-activated protein kinase kinase kinase 10 OS=Homo sapiens GN=MAP3K10 PE=1 SV=3	6e-17	1	34.5865	6e-17	133
comp246054_c0_seq2	len=955	-4.10288	1.1431	2.84e-05	0.0104008	sp|A2VDF0|FUCM_HUMAN	Fucose mutarotase OS=Homo sapiens GN=FUOM PE=1 SV=2	6e-61	1	63.6986	6e-61	146
comp259935_c0_seq5	len=2930	5.16933	3.40128	3.45e-05	0.0121598	sp|Q6AY30|SCPDL_RAT	Saccharopine dehydrogenase-like oxidoreductase OS=Rattus norvegicus GN=Sccpdh PE=2 SV=1	1e-118	1	43.1604	1e-118	424
comp239375_c0_seq1	len=1819	3.04592	6.69612	4.15e-05	0.0140749	sp|Q95SX7|RTBS_DROME	Probable RNA-directed DNA polymerase from transposon BS OS=Drosophila melanogaster GN=RTase PE=2 SV=1	1e-30	1	25.7353	1e-30	408
comp246240_c0_seq1	len=499	2.5592	1.92716	4.19e-05	0.0141191	sp|P04572|SCP_PERVT	Sarcoplasmic calcium-binding protein OS=Perinereis vancaurica tetradentata PE=1 SV=1	9e-15	1	28.4848	9e-15	165
comp260799_c5_seq1	len=1101	3.71579	2.26954	4.53e-05	0.0151092	sp|Q69566|U88_HHV6U	Uncharacterized protein U88 OS=Human herpesvirus 6A (strain Uganda-1102) GN=U88 PE=4 SV=1	8e-12	1	41.25	8e-12	80
comp254188_c1_seq9	len=1521	-3.00974	2.16609	4.93e-05	0.0161259	sp|Q6DFV8|VWDE_MOUSE	von Willebrand factor D and EGF domain-containing protein OS=Mus musculus GN=Vwde PE=2 SV=2	2e-10	1	25	2e-10	232
comp243020_c1_seq1	len=553	-3.22531	2.94079	6.55e-05	0.0201243	sp|Q6UWM7|LCTL_HUMAN	Lactase-like protein OS=Homo sapiens GN=LCTL PE=1 SV=2	2e-43	1	44.7205	2e-43	161
comp255936_c1_seq2	len=3024	3.92758	0.133569	7.41e-05	0.0223899	sp|P29375|KDM5A_HUMAN	Lysine-specific demethylase 5A OS=Homo sapiens GN=KDM5A PE=1 SV=3	4e-34	1	28.4574	4e-34	376
comp262159_c0_seq6	len=3523	-2.83704	0.0469345	7.96e-05	0.0238046	sp|Q13627|DYR1A_HUMAN	Dual specificity tyrosine-phosphorylation-regulated kinase 1A OS=Homo sapiens GN=DYRK1A PE=1 SV=2	0	1	71.9715	0	421
comp253718_c1_seq8	len=355	-2.47014	0.954258	8.05e-05	0.0239419	sp|Q9JLB4|CUBN_MOUSE	Cubilin OS=Mus musculus GN=Cubn PE=1 SV=3	1e-09	1	38.75	1e-09	80
comp258226_c1_seq2	len=1044	2.6203	-0.294781	9.52e-05	0.0277134	sp|Q460N5|PAR14_HUMAN	Poly [ADP-ribose] polymerase 14 OS=Homo sapiens GN=PARP14 PE=1 SV=3	3e-12	1	22.3975	3e-12	317
comp261970_c0_seq1	len=4534	-3.11636	2.78221	0.000116246	0.0319886	sp|Q921M4|GOGA2_MOUSE	Golgin subfamily A member 2 OS=Mus musculus GN=Golga2 PE=1 SV=3	2e-32	1	22.7468	2e-32	699
comp252780_c1_seq1	len=933	2.05502	3.25998	0.000141288	0.0368622	sp|Q60738|ZNT1_MOUSE	Zinc transporter 1 OS=Mus musculus GN=Slc30a1 PE=2 SV=1	2e-40	1	41.3793	2e-40	232
comp234699_c1_seq1	len=494	4.03046	3.0711	0.000160835	0.039714	sp|P04572|SCP_PERVT	Sarcoplasmic calcium-binding protein OS=Perinereis vancaurica tetradentata PE=1 SV=1	9e-13	1	25.8278	9e-13	151
comp236204_c0_seq1	len=371	3.03556	2.56147	0.000209245	0.0492491	sp|Q3LX99|TXLR3_EISFO	Lysenin-related protein 3 OS=Eisenia foetida PE=2 SV=1	1e-31	1	49.5935	1e-31	123
comp230506_c0_seq2	len=1381	-3.47795	0.763001	0.000217715	0.0502243	sp|Q8HXW6|PPT1_MACFA	Palmitoyl-protein thioesterase 1 OS=Macaca fascicularis GN=PPT1 PE=2 SV=1	1e-125	1	63.2353	1e-125	272
comp236204_c1_seq1	len=775	3.21569	3.38246	0.000219655	0.0502243	sp|Q3LX99|TXLR3_EISFO	Lysenin-related protein 3 OS=Eisenia foetida PE=2 SV=1	2e-30	1	56	2e-30	100
comp241083_c0_seq1	len=711	1.89606	3.17216	0.000225118	0.0508484	sp|B3MFV7|LPHN_DROAN	Latrophilin Cirl OS=Drosophila ananassae GN=Cirl PE=3 SV=1	9e-13	1	38.7755	9e-13	98
comp257395_c0_seq6	len=1076	3.55441	2.31227	0.000225556	0.0508484	sp|P09352|SR2A_PHYPO	Spherulin-2A OS=Physarum polycephalum PE=2 SV=1	2e-07	1	38.9831	2e-07	59
comp250138_c0_seq1	len=2746	4.29903	2.37232	0.000226152	0.0508484	sp|P38977|ANTA_HYDVU	Antistasin OS=Hydra vulgaris PE=2 SV=1	1e-17	1	31.1765	1e-17	170
comp249318_c1_seq1	len=322	-2.00236	0.323912	0.000248693	0.0545852	sp|Q4PJW3|CP51A_BOVIN	Lanosterol 14-alpha demethylase OS=Bos taurus GN=CYP51A1 PE=2 SV=1	4e-48	1	72.381	4e-48	105
comp260072_c4_seq3	len=303	2.33738	0.196549	0.000251883	0.0550667	sp|A1Z1Q3|MACD2_HUMAN	O-acetyl-ADP-ribose deacetylase MACROD2 OS=Homo sapiens GN=MACROD2 PE=1 SV=1	3e-20	1	43.3962	3e-20	106
comp255926_c2_seq2	len=485	-2.20241	1.68707	0.000256323	0.055598	sp|Q53GL7|PAR10_HUMAN	Poly [ADP-ribose] polymerase 10 OS=Homo sapiens GN=PARP10 PE=1 SV=2	2e-07	1	46.4286	2e-07	56
comp254015_c0_seq4	len=1608	3.44345	3.08252	0.000268666	0.0575181	sp|Q8N2E2|VWDE_HUMAN	von Willebrand factor D and EGF domain-containing protein OS=Homo sapiens GN=VWDE PE=2 SV=4	3e-11	1	26.7081	3e-11	161
comp256308_c0_seq1	len=569	-2.20295	4.07902	0.000272791	0.0578356	sp|Q9D3D0|TTPAL_MOUSE	Alpha-tocopherol transfer protein-like OS=Mus musculus GN=Ttpal PE=2 SV=3	7e-12	1	31.0526	7e-12	190
comp255057_c0_seq2	len=4036	3.47753	0.464415	0.000307571	0.0634779	sp|P10079|FBP1_STRPU	Fibropellin-1 OS=Strongylocentrotus purpuratus GN=EGF1 PE=1 SV=2	2e-25	1	44.1176	2e-25	136
comp263223_c0_seq1	len=240	2.34973	4.1869	0.000318782	0.0653044	sp|Q5RC26|FBLN5_PONAB	Fibulin-5 OS=Pongo abelii GN=FBLN5 PE=2 SV=1	3e-17	1	44.8718	3e-17	78
comp243591_c4_seq1	len=946	-2.27055	1.85724	0.00036756	0.0728677	sp|Q78IQ7|S39A4_MOUSE	Zinc transporter ZIP4 OS=Mus musculus GN=Slc39a4 PE=1 SV=1	7e-17	1	37.5	7e-17	136
comp254826_c1_seq1	len=1300	-3.52865	0.423743	0.00038237	0.0755332	sp|P55006|RDH7_RAT	Retinol dehydrogenase 7 OS=Rattus norvegicus GN=Rdh7 PE=2 SV=1	5e-63	1	40.9722	5e-63	288
comp259716_c0_seq2	len=2823	-5.8546	0.211547	0.000422297	0.0813855	sp|A2T737|EHF_PANTR	ETS homologous factor OS=Pan troglodytes GN=EHF PE=3 SV=1	2e-17	1	43.299	2e-17	97
comp221599_c0_seq1	len=485	-2.61804	1.41603	0.00043739	0.0840016	sp|P16065|GCY_STRPU	Speract receptor OS=Strongylocentrotus purpuratus PE=2 SV=1	2e-21	1	30.8642	2e-21	162
comp255110_c0_seq3	len=826	2.68846	1.59239	0.000452204	0.0865462	sp|P17136|RSMB_RAT	Small nuclear ribonucleoprotein-associated protein B (Fragment) OS=Rattus norvegicus GN=Snrpb PE=2 SV=1	7e-22	1	56.383	7e-22	94
comp256629_c5_seq4	len=614	-2.78405	2.49076	0.000526058	0.0982905	sp|Q8N2E2|VWDE_HUMAN	von Willebrand factor D and EGF domain-containing protein OS=Homo sapiens GN=VWDE PE=2 SV=4	2e-12	1	35.1145	2e-12	131
comp258020_c0_seq1	len=3450	4.03859	5.36817	0.000527784	0.0982905	sp|P05089|ARGI1_HUMAN	Arginase-1 OS=Homo sapiens GN=ARG1 PE=1 SV=2	2e-90	1	47.9365	2e-90	315
comp194637_c0_seq1	len=467	2.80991	0.222017	0.000556512	0.102263	sp|Q95SX7|RTBS_DROME	Probable RNA-directed DNA polymerase from transposon BS OS=Drosophila melanogaster GN=RTase PE=2 SV=1	5e-06	1	29.8387	5e-06	124
comp262491_c1_seq2	len=319	3.04511	0.693627	0.000602504	0.108869	sp|Q95UN8|M3KSL_DROME	Mitogen-activated protein kinase kinase kinase OS=Drosophila melanogaster GN=slpr PE=1 SV=1	2e-12	1	38.7387	2e-12	111
comp243821_c2_seq1	len=451	1.96871	1.5501	0.000608207	0.108869	sp|Q9Z0M6|CD97_MOUSE	CD97 antigen OS=Mus musculus GN=Cd97 PE=1 SV=2	6e-10	1	44.1176	6e-10	68
comp252213_c0_seq1	len=1528	2.70385	0.281737	0.000661739	0.116195	sp|A6QQF5|QORL2_BOVIN	Quinone oxidoreductase-like protein 2 OS=Bos taurus PE=2 SV=2	4e-14	1	25.256	4e-14	293
comp246240_c0_seq2	len=1002	2.07869	3.00485	0.000673074	0.11744	sp|P04572|SCP_PERVT	Sarcoplasmic calcium-binding protein OS=Perinereis vancaurica tetradentata PE=1 SV=1	3e-19	1	30.1136	3e-19	176
comp203194_c0_seq1	len=624	-2.83402	1.14125	0.000681575	0.117485	sp|Q60847|COCA1_MOUSE	Collagen alpha-1(XII) chain OS=Mus musculus GN=Col12a1 PE=2 SV=3	3e-07	1	28.0303	3e-07	132
comp233388_c0_seq1	len=264	2.01394	1.09276	0.000682592	0.117485	sp|Q9WVH9|FBLN5_MOUSE	Fibulin-5 OS=Mus musculus GN=Fbln5 PE=2 SV=1	9e-22	1	43.8202	9e-22	89
comp263009_c0_seq1	len=472	-5.56902	6.02093	0.000683956	0.117485	sp|P35003|CTRL_HALRU	Chymotrypsin-like serine proteinase OS=Haliotis rufescens PE=1 SV=1	2e-33	1	41.0256	2e-33	156
comp254233_c1_seq1	len=3332	-2.57441	2.38478	0.000761986	0.129283	sp|P16320|NOF_DROME	120,7 kDa protein in NOF-FB transposable element OS=Drosophila melanogaster GN=NOF PE=4 SV=2	6e-09	1	23.9535	6e-09	430
comp260855_c3_seq2	len=3294	-3.03593	-0.121273	0.000770306	0.130073	sp|Q17N71|CLU_AEDAE	Clustered mitochondria protein homolog OS=Aedes aegypti GN=AAEL000794 PE=3 SV=1	0	1	50.8333	0	720
comp244912_c0_seq1	len=288	2.11595	2.89265	0.000774427	0.130073	sp|P04572|SCP_PERVT	Sarcoplasmic calcium-binding protein OS=Perinereis vancaurica tetradentata PE=1 SV=1	8e-07	1	25.5319	8e-07	94
comp261195_c1_seq5	len=1288	2.13115	0.12747	0.000790835	0.132151	sp|Q5U305|ERD22_RAT	ER lumen protein retaining receptor 2 OS=Rattus norvegicus GN=Kdelr2 PE=2 SV=1	1e-115	1	77.8302	1e-115	212
comp207422_c1_seq1	len=237	-3.8473	0.235398	0.000820574	0.135889	sp|Q23023|UNC51_CAEEL	Serine/threonine-protein kinase unc-51 OS=Caenorhabditis elegans GN=unc-51 PE=1 SV=1	6e-14	1	45.0704	6e-14	71
comp243591_c3_seq1	len=286	-1.90639	0.475437	0.000891782	0.145933	sp|Q9VSL7|FOI_DROME	Zinc transporter foi OS=Drosophila melanogaster GN=foi PE=1 SV=3	3e-06	1	70.3704	3e-06	27
comp246431_c0_seq1	len=245	-2.19955	0.164586	0.000899468	0.146757	sp|Q9QWF0|CAF1A_MOUSE	Chromatin assembly factor 1 subunit A OS=Mus musculus GN=Chaf1a PE=1 SV=1	2e-07	1	38.2716	2e-07	81
comp257158_c0_seq2	len=4555	2.35914	0.561999	0.000949822	0.154063	sp|Q804S5|MIB1_DANRE	E3 ubiquitin-protein ligase mib1 OS=Danio rerio GN=mib1 PE=1 SV=1	0	1	73.913	0	1058
comp260104_c1_seq8	len=1120	3.21063	1.91707	0.00100404	0.159125	sp|A9JRD8|BTB6A_DANRE	BTB/POZ domain-containing protein 6-A OS=Danio rerio GN=btbd6a PE=1 SV=1	8e-19	1	26.3699	8e-19	292
comp221757_c0_seq1	len=255	2.12924	0.712754	0.00102687	0.160899	sp|P98060|NAS35_CAEEL	Zinc metalloproteinase dpy-31 OS=Caenorhabditis elegans GN=dpy-31 PE=1 SV=2	5e-16	1	43.6782	5e-16	87
comp262034_c0_seq6	len=2492	-3.30366	2.3301	0.00108395	0.166251	sp|Q75WE7|VWA5A_RAT	von Willebrand factor A domain-containing protein 5A OS=Rattus norvegicus GN=Vwa5a PE=2 SV=1	1e-123	1	39.9007	1e-123	604
comp254388_c1_seq1	len=1543	-2.69335	-0.332275	0.00115887	0.175132	sp|P29054|TF2B_XENLA	Transcription initiation factor IIB OS=Xenopus laevis GN=gtf2b PE=2 SV=1	1e-144	1	68.1967	1e-144	305
comp243591_c2_seq1	len=486	-1.88452	1.03936	0.00118876	0.17916	sp|Q504Y0|S39AC_HUMAN	Zinc transporter ZIP12 OS=Homo sapiens GN=SLC39A12 PE=2 SV=3	1e-21	1	47.9592	1e-21	98
comp261879_c0_seq2	len=442	2.14287	0.386645	0.0012848	0.191031	sp|Q6PAW2|UBP16_XENLA	Ubiquitin carboxyl-terminal hydrolase 16 OS=Xenopus laevis GN=usp16 PE=2 SV=1	3e-23	1	41.2587	3e-23	143
comp256237_c0_seq2	len=2818	2.76288	1.85467	0.00129416	0.191393	sp|Q3SYV4|CAP1_BOVIN	Adenylyl cyclase-associated protein 1 OS=Bos taurus GN=CAP1 PE=2 SV=3	1e-38	1	44.2953	1e-38	149
comp250447_c2_seq1	len=971	-1.58823	3.37176	0.00136766	0.200654	sp|Q6R5N8|TLR13_MOUSE	Toll-like receptor 13 OS=Mus musculus GN=Tlr13 PE=1 SV=1	6e-11	1	36.9048	6e-11	84
comp243821_c1_seq1	len=328	1.92347	0.828094	0.00155728	0.220858	sp|P23142|FBLN1_HUMAN	Fibulin-1 OS=Homo sapiens GN=FBLN1 PE=1 SV=4	7e-24	1	52.7473	7e-24	91
comp259282_c2_seq3	len=1958	-3.64953	2.91689	0.0015996	0.223692	sp|P31696|AGRIN_CHICK	Agrin OS=Gallus gallus GN=AGRN PE=1 SV=3	4e-22	1	39.0071	4e-22	141
comp196311_c0_seq1	len=1125	1.63387	5.02702	0.00174947	0.237752	sp|P22222|E13B_CELCE	Glucan endo-1		NA			NA
comp248426_c0_seq1	len=1097	-1.79816	3.36098	0.00176099	0.238731	sp|Q8R4D5|TRPM8_MOUSE	Transient receptor potential cation channel subfamily M member 8 OS=Mus musculus GN=Trpm8 PE=1 SV=3	4e-26	1	31.6151	4e-26	291
comp262574_c0_seq5	len=1113	1.57507	1.36698	0.00176837	0.239145	sp|P12311|ADH1_GEOSE	Alcohol dehydrogenase OS=Geobacillus stearothermophilus GN=adhT PE=1 SV=2	4e-20	1	27.8481	4e-20	316
comp244025_c0_seq2	len=356	1.66031	1.32479	0.0017809	0.239668	sp|Q4LDE5|SVEP1_HUMAN	Sushi		NA			NA
comp262188_c0_seq15	len=468	3.43845	1.41292	0.00183489	0.245737	sp|Q9NX46|ARHL2_HUMAN	Poly(ADP-ribose) glycohydrolase ARH3 OS=Homo sapiens GN=ADPRHL2 PE=1 SV=1	6e-22	1	52.439	6e-22	82
comp258676_c0_seq6	len=765	-1.62155	3.17184	0.00195872	0.257336	sp|P35992|PTP10_DROME	Tyrosine-protein phosphatase 10D OS=Drosophila melanogaster GN=Ptp10D PE=1 SV=3	2e-07	1	23.3463	2e-07	257
comp253519_c1_seq3	len=299	2.03808	1.25376	0.00197797	0.258637	sp|P04572|SCP_PERVT	Sarcoplasmic calcium-binding protein OS=Perinereis vancaurica tetradentata PE=1 SV=1	2e-07	1	43.75	2e-07	48
comp248173_c0_seq1	len=1361	-1.63037	1.00565	0.00199877	0.260126	sp|Q719N3|PAQRB_RAT	Monocyte to macrophage differentiation factor OS=Rattus norvegicus GN=Mmd PE=2 SV=1	6e-63	1	44.2982	6e-63	228
comp230506_c0_seq1	len=1364	3.05244	0.949158	0.00202603	0.262584	sp|Q8HXW6|PPT1_MACFA	Palmitoyl-protein thioesterase 1 OS=Macaca fascicularis GN=PPT1 PE=2 SV=1	1e-125	1	63.2353	1e-125	272
comp260752_c1_seq1	len=672	-1.93432	2.72702	0.00222582	0.281722	sp|P34456|YMD2_CAEEL	Uncharacterized protein F54H12,2 OS=Caenorhabditis elegans GN=F54H12,2 PE=4 SV=1	2e-16	1	26.5487	2e-16	226
comp260090_c0_seq1	len=3299	2.94275	1.56799	0.00227336	0.284944	sp|P69098|CALM_TRYBG	Calmodulin OS=Trypanosoma brucei gambiense PE=3 SV=2	5e-41	1	51.0204	5e-41	147
comp175976_c0_seq1	len=450	-1.60256	1.26916	0.00231347	0.287009	sp|P50876|R144A_HUMAN	Probable E3 ubiquitin-protein ligase RNF144A OS=Homo sapiens GN=RNF144A PE=1 SV=2	2e-07	1	37.2881	2e-07	59
comp246524_c1_seq1	len=1282	-2.26824	1.9078	0.00232642	0.287009	sp|Q9NZM6|PK2L2_HUMAN	Polycystic kidney disease 2-like 2 protein OS=Homo sapiens GN=PKD2L2 PE=2 SV=2	3e-07	1	20.4878	3e-07	205
comp261670_c0_seq1	len=3188	-3.47811	5.88566	0.0023278	0.287009	sp|Q8C827|ZFP62_MOUSE	Zinc finger protein 62 OS=Mus musculus GN=Zfp62 PE=2 SV=1	1e-14	1	50.6494	1e-14	77
comp211156_c0_seq1	len=364	1.68654	0.704716	0.00245644	0.296009	sp|Q7M3K2|PELET_DROME	Transposable element P transposase OS=Drosophila melanogaster GN=T PE=1 SV=2	7e-13	1	38.6139	7e-13	101
comp252504_c0_seq1	len=2308	2.4435	1.31187	0.00249307	0.299119	sp|Q40082|XYLA_HORVU	Xylose isomerase OS=Hordeum vulgare GN=XYLA PE=1 SV=1	1e-174	1	57.3394	1e-174	436
comp238886_c2_seq1	len=517	-2.14833	0.426079	0.00261082	0.309223	sp|P15620|ZN271_MOUSE	Zinc finger protein 271 OS=Mus musculus GN=Znf271 PE=2 SV=1	2e-13	1	50	2e-13	58
comp254481_c4_seq1	len=1509	-2.72766	2.92429	0.00262366	0.31008	sp|Q7RTY7|OVCH1_HUMAN	Ovochymase-1 OS=Homo sapiens GN=OVCH1 PE=2 SV=2	2e-63	1	35.3562	2e-63	379
comp258546_c2_seq5	len=703	-2.17793	3.09331	0.00265546	0.312503	sp|O02350|CBPA1_ANOGA	Zinc carboxypeptidase A 1 OS=Anopheles gambiae GN=AGAP009593 PE=2 SV=3	2e-15	1	23.1707	2e-15	164
comp247035_c0_seq1	len=612	-1.85929	1.29273	0.00267764	0.313777	sp|P70085|CP17A_ORYLA	Steroid 17-alpha-hydroxylase/17		NA			NA
comp250240_c0_seq1	len=1098	-2.01159	2.32056	0.00270635	0.315089	sp|Q9JLB4|CUBN_MOUSE	Cubilin OS=Mus musculus GN=Cubn PE=1 SV=3	3e-22	1	27.8481	3e-22	316
comp254803_c0_seq3	len=1277	1.75659	0.781704	0.00273691	0.316354	sp|Q91X85|FLVC2_MOUSE	Feline leukemia virus subgroup C receptor-related protein 2 OS=Mus musculus GN=Flvcr2 PE=1 SV=2	3e-86	1	45.0311	3e-86	322
comp236888_c0_seq1	len=602	-2.37838	1.83026	0.00273966	0.316354	sp|O15991|KLOM_EISFO	Lombricine kinase OS=Eisenia foetida PE=1 SV=1	3e-57	1	68.1159	3e-57	138
comp259276_c0_seq4	len=1176	-2.51294	2.46682	0.00278822	0.319127	sp|Q96PP9|GBP4_HUMAN	Guanylate-binding protein 4 OS=Homo sapiens GN=GBP4 PE=1 SV=2	2e-70	1	33.8384	2e-70	396
comp222524_c0_seq1	len=255	-1.74373	0.599695	0.00287519	0.325881	sp|P30430|FUR1C_DROME	Furin-like protease 1		NA			NA
comp246830_c2_seq2	len=327	-1.92379	1.25883	0.00298977	0.332731	sp|P34457|YMD3_CAEEL	Putative uncharacterized transposon-derived protein F54H12,3 OS=Caenorhabditis elegans GN=F54H12,3 PE=5 SV=1	2e-13	1	37.7551	2e-13	98
comp249417_c0_seq1	len=725	1.48742	1.4955	0.00302678	0.334829	sp|O42414|NFASC_CHICK	Neurofascin OS=Gallus gallus GN=NFASC PE=1 SV=1	6e-19	1	31.3953	6e-19	172
comp249852_c1_seq5	len=949	3.45151	1.11653	0.00313163	0.34215	sp|Q5IGR6|EXT1C_DANRE	Exostosin-1c OS=Danio rerio GN=ext1c PE=2 SV=1	1e-21	1	35.2601	1e-21	173
comp243613_c0_seq1	len=564	2.08056	1.18197	0.0031479	0.342743	sp|Q9NZJ4|SACS_HUMAN	Sacsin OS=Homo sapiens GN=SACS PE=1 SV=2	5e-09	1	26.5957	5e-09	188
comp199294_c0_seq1	len=251	2.52425	1.02965	0.00330218	0.354654	sp|P86854|PLCL_MYTGA	Perlucin-like protein OS=Mytilus galloprovincialis PE=1 SV=1	5e-06	1	40.4255	5e-06	47
comp223303_c0_seq1	len=814	2.13166	2.28085	0.00332292	0.35619	sp|Q7PPU9|BND7A_ANOGA	Band 7 protein AGAP004871 OS=Anopheles gambiae GN=AGAP004871 PE=3 SV=3	5e-39	1	64.9573	5e-39	117
comp255870_c1_seq1	len=345	1.67414	0.552266	0.00338596	0.361546	sp|Q9P243|ZFAT_HUMAN	Zinc finger protein ZFAT OS=Homo sapiens GN=ZFAT PE=1 SV=2	1e-07	1	27.027	1e-07	111
comp243540_c2_seq1	len=289	1.58696	1.07193	0.0035124	0.370009	sp|Q13489|BIRC3_HUMAN	Baculoviral IAP repeat-containing protein 3 OS=Homo sapiens GN=BIRC3 PE=1 SV=2	2e-21	1	70.3704	2e-21	54
comp241688_c1_seq1	len=422	-1.52164	0.56232	0.00352542	0.370009	sp|Q13535|ATR_HUMAN	Serine/threonine-protein kinase ATR OS=Homo sapiens GN=ATR PE=1 SV=3	1e-34	1	46.4286	1e-34	140
comp251007_c0_seq2	len=1427	2.92142	0.678304	0.00361577	0.374358	sp|Q645M6|FADD_BOVIN	Protein FADD OS=Bos taurus GN=FADD PE=2 SV=1	4e-10	1	38.5542	4e-10	83
comp259276_c0_seq1	len=2032	-2.69711	4.23603	0.00366899	0.378398	sp|Q5D1D6|GBP1_CHLAE	Interferon-induced guanylate-binding protein 1 OS=Chlorocebus aethiops GN=GBP1 PE=2 SV=1	1e-116	1	37.2514	1e-116	553
comp257252_c2_seq1	len=2074	-1.95241	5.83812	0.00370702	0.380406	sp|O94264|YORF_SCHPO	Uncharacterized RING finger protein P8B7,15c OS=Schizosaccharomyces pombe (strain 972 / ATCC 24843) GN=SPBP8B7,15c PE=4 SV=1	5e-11	1	31.9328	5e-11	119
comp217475_c0_seq1	len=221	1.93296	2.15151	0.00385238	0.390209	sp|P04571|SCP_HEDDI	Sarcoplasmic calcium-binding protein OS=Hediste diversicolor PE=1 SV=1	7e-07	1	43.1818	7e-07	44
comp260101_c1_seq1	len=1087	1.74611	4.46528	0.00387309	0.390209	sp|Q91147|FGFR2_NOTVI	Fibroblast growth factor receptor 2 OS=Notophthalmus viridescens GN=FGFR2 PE=2 SV=1	4e-24	1	35.8974	4e-24	156
comp243047_c3_seq1	len=2033	-1.7737	3.4865	0.00391646	0.393146	sp|D3YXS5|KLP6_MOUSE	Kinesin-like protein KLP6 OS=Mus musculus GN=Klp6 PE=3 SV=1	1e-50	1	30.7317	1e-50	410
comp253767_c0_seq1	len=4016	-1.36733	0.727241	0.003926	0.393389	sp|Q99K28|ARFG2_MOUSE	ADP-ribosylation factor GTPase-activating protein 2 OS=Mus musculus GN=Arfgap2 PE=1 SV=1	1e-110	1	42.0664	1e-110	542
comp251502_c1_seq1	len=2683	-2.25897	3.95205	0.00395961	0.395729	sp|Q6PCJ1|DCTN1_XENLA	Dynactin subunit 1 OS=Xenopus laevis GN=dctn1 PE=2 SV=1	3e-82	1	29.7297	3e-82	666
comp237464_c0_seq1	len=1147	-1.76265	2.79026	0.00442783	0.419304	sp|Q99741|CDC6_HUMAN	Cell division control protein 6 homolog OS=Homo sapiens GN=CDC6 PE=1 SV=1	9e-92	1	44.0476	9e-92	336
comp246192_c0_seq1	len=1143	-2.46912	2.31499	0.0044348	0.419304	sp|Q96RY7|IF140_HUMAN	Intraflagellar transport protein 140 homolog OS=Homo sapiens GN=IFT140 PE=1 SV=1	1e-88	1	41.1458	1e-88	384
comp261711_c0_seq11	len=786	-3.12711	4.02346	0.00445283	0.420291	sp|Q60847|COCA1_MOUSE	Collagen alpha-1(XII) chain OS=Mus musculus GN=Col12a1 PE=2 SV=3	2e-11	1	25.7895	2e-11	190
comp246709_c0_seq4	len=937	-3.15735	5.15488	0.00467257	0.4373	sp|Q54SF4|Y4797_DICDI	Putative uncharacterized protein DDB_G0282499 OS=Dictyostelium discoideum GN=DDB_G0282499 PE=4 SV=2	3e-13	1	23.1373	3e-13	255
comp211425_c0_seq1	len=210	1.50569	0.749464	0.00478381	0.444735	sp|Q03720|SLO_DROME	Calcium-activated potassium channel slowpoke OS=Drosophila melanogaster GN=slo PE=1 SV=3	4e-14	1	47.6923	4e-14	65
comp254826_c1_seq2	len=1346	1.81318	1.41143	0.00481927	0.446167	sp|P55006|RDH7_RAT	Retinol dehydrogenase 7 OS=Rattus norvegicus GN=Rdh7 PE=2 SV=1	6e-63	1	41.3194	6e-63	288
comp252667_c0_seq2	len=1213	-2.95727	1.8728	0.00526062	0.478569	sp|Q69P80|COP51_ORYSJ	Copper transporter 5,1 OS=Oryza sativa subsp, japonica GN=COPT5,1 PE=2 SV=1	8e-18	1	33.9744	8e-18	156
comp220987_c0_seq1	len=673	1.51559	1.90144	0.00530191	0.479949	sp|Q7M3K2|PELET_DROME	Transposable element P transposase OS=Drosophila melanogaster GN=T PE=1 SV=2	5e-11	1	34.1176	5e-11	170
comp246054_c0_seq1	len=913	1.67238	2.12789	0.00532985	0.480074	sp|A2VDF0|FUCM_HUMAN	Fucose mutarotase OS=Homo sapiens GN=FUOM PE=1 SV=2	4e-61	1	63.6986	4e-61	146
comp248145_c0_seq1	len=1835	1.74174	6.12878	0.00543881	0.488354	sp|Q68VK5|TSN5_RAT	Tetraspanin-5 OS=Rattus norvegicus GN=Tspan5 PE=2 SV=2	1e-72	1	46.3602	1e-72	261
comp256103_c1_seq2	len=1765	3.11361	0.299437	0.00551701	0.492431	sp|P33527|MRP1_HUMAN	Multidrug resistance-associated protein 1 OS=Homo sapiens GN=ABCC1 PE=1 SV=3	2e-84	1	72.1951	2e-84	205
comp261638_c1_seq22	len=3114	1.57302	0.807029	0.00551982	0.492431	sp|Q8MPM1|GELS2_LUMTE	Gelsolin-like protein 2 OS=Lumbricus terrestris GN=gelsolin PE=1 SV=1	0	1	82.0163	0	367
comp255817_c0_seq1	len=1596	1.91551	0.121435	0.00561527	0.49817	sp|Q2KIK0|SUGT1_BOVIN	Suppressor of G2 allele of SKP1 homolog OS=Bos taurus GN=SUGT1 PE=2 SV=1	2e-79	1	40.4558	2e-79	351
comp250652_c0_seq2	len=1351	-2.06643	0.76839	0.00562018	0.49817	sp|A6H8Z2|F221B_HUMAN	Protein FAM221B OS=Homo sapiens GN=FAM221B PE=2 SV=2	7e-76	1	55.6122	7e-76	196
comp250472_c0_seq2	len=2090	-1.50886	3.32729	0.00564177	0.499283	sp|Q54KA7|SECG_DICDI	Ankyrin repeat		NA			NA
comp258884_c0_seq2	len=1735	-2.65137	1.08521	0.00583907	0.513458	sp|Q2KHZ9|GCDH_BOVIN	Glutaryl-CoA dehydrogenase		NA			NA
comp241178_c1_seq1	len=858	-2.07748	1.62516	0.00592242	0.518315	sp|Q5RJ80|CAPR2_DANRE	Caprin-2 OS=Danio rerio GN=caprin2 PE=2 SV=1	1e-14	1	34.5588	1e-14	136
comp260123_c0_seq1	len=2892	-2.27146	1.11923	0.00600429	0.520064	sp|A7E3W5|SNG2_BOVIN	Synaptogyrin-2 OS=Bos taurus GN=SYNGR2 PE=2 SV=1	4e-26	1	34.8718	4e-26	195
comp248899_c0_seq1	len=953	-1.56674	3.20412	0.00612148	0.524938	sp|P43404|ZAP70_MOUSE	Tyrosine-protein kinase ZAP-70 OS=Mus musculus GN=Zap70 PE=1 SV=3	7e-31	1	54.6392	7e-31	97
comp250692_c1_seq5	len=613	-1.7142	1.85022	0.00627994	0.534336	sp|Q8JIS3|DER_CHICK	D-erythrulose reductase OS=Gallus gallus GN=DER PE=1 SV=1	1e-35	1	43.8356	1e-35	146
comp238398_c0_seq6	len=537	1.87865	1.36644	0.00645712	0.543607	sp|P04572|SCP_PERVT	Sarcoplasmic calcium-binding protein OS=Perinereis vancaurica tetradentata PE=1 SV=1	2e-11	1	26.8966	2e-11	145
comp252165_c1_seq2	len=1091	-1.97321	2.49802	0.00647847	0.543932	sp|P10079|FBP1_STRPU	Fibropellin-1 OS=Strongylocentrotus purpuratus GN=EGF1 PE=1 SV=2	5e-17	1	28.1022	5e-17	274
comp250103_c0_seq1	len=292	-1.38851	1.52471	0.00651068	0.545624	sp|Q63164|DYH1_RAT	Dynein heavy chain 1		NA			NA
comp253126_c0_seq1	len=1100	-2.09804	3.65245	0.00655462	0.548476	sp|Q9VAC5|ADA17_DROME	ADAM 17-like protease OS=Drosophila melanogaster GN=Tace PE=2 SV=2	7e-49	1	34.7607	7e-49	397
comp234407_c0_seq1	len=237	-1.92547	1.28858	0.00663326	0.553382	sp|Q61830|MRC1_MOUSE	Macrophage mannose receptor 1 OS=Mus musculus GN=Mrc1 PE=1 SV=2	9e-10	1	36	9e-10	75
comp256323_c1_seq3	len=2193	1.49173	5.29685	0.0066688	0.55487	sp|O88281|MEGF6_RAT	Multiple epidermal growth factor-like domains protein 6 OS=Rattus norvegicus GN=Megf6 PE=1 SV=1	1e-66	1	37.8641	1e-66	309
comp262136_c0_seq3	len=4748	-2.06643	0.541438	0.00683199	0.563166	sp|Q91VE0|S27A4_MOUSE	Long-chain fatty acid transport protein 4 OS=Mus musculus GN=Slc27a4 PE=1 SV=1	0	1	49.6914	0	648
comp258942_c0_seq25	len=408	-1.33442	1.21289	0.00697386	0.568925	sp|P16425|Y2R2_DROME	Putative 115 kDa protein in type-1 retrotransposable element R1DM OS=Drosophila melanogaster PE=4 SV=1	3e-07	1	28.5714	3e-07	112
comp156607_c0_seq1	len=1481	2.91319	6.77406	0.00714495	0.578195	sp|P09352|SR2A_PHYPO	Spherulin-2A OS=Physarum polycephalum PE=2 SV=1	1e-40	1	31.8021	1e-40	283
comp252780_c2_seq1	len=626	1.50909	2.59396	0.0071638	0.578195	sp|P20107|ZRC1_YEAST	Zinc/cadmium resistance protein OS=Saccharomyces cerevisiae (strain ATCC 204508 / S288c) GN=ZRC1 PE=1 SV=2	6e-32	1	55.3571	6e-32	112
comp258332_c0_seq8	len=3033	-3.22962	4.89415	0.00725792	0.581352	sp|Q32LQ0|AMPE_BOVIN	Glutamyl aminopeptidase OS=Bos taurus GN=ENPEP PE=2 SV=1	1e-104	1	27.7469	1e-104	901
comp171344_c0_seq1	len=443	-1.93444	0.476451	0.00744015	0.58999	sp|Q8QGW7|LITAF_CHICK	Lipopolysaccharide-induced tumor necrosis factor-alpha factor homolog OS=Gallus gallus GN=LITAF PE=2 SV=1	3e-27	1	44.7917	3e-27	96
comp251130_c1_seq2	len=692	-1.63085	1.44578	0.00748062	0.590656	sp|P55202|ANPRB_ANGJA	Atrial natriuretic peptide receptor 2 OS=Anguilla japonica GN=npr2 PE=2 SV=1	2e-36	1	33.3333	2e-36	228
comp255930_c2_seq1	len=1116	-2.20098	3.5358	0.00757379	0.595895	sp|Q5ZQU0|SNED1_RAT	Sushi		NA			NA
comp254202_c0_seq4	len=277	-2.01476	1.16153	0.00761285	0.597409	sp|P10076|ZFP26_MOUSE	Zinc finger protein 26 OS=Mus musculus GN=Zfp26 PE=2 SV=2	4e-24	1	48.8636	4e-24	88
comp227806_c0_seq1	len=576	-2.03674	2.14512	0.00766865	0.599097	sp|P52889|LHX5_DANRE	LIM/homeobox protein Lhx5 OS=Danio rerio GN=lhx5 PE=2 SV=1	5e-44	1	56.5217	5e-44	161
comp234874_c1_seq1	len=297	1.47939	0.910492	0.00770577	0.600301	sp|Q9H8W5|TRI45_HUMAN	Tripartite motif-containing protein 45 OS=Homo sapiens GN=TRIM45 PE=1 SV=2	2e-06	1	39.2157	2e-06	51
comp257331_c0_seq17	len=934	2.82982	2.02601	0.00772539	0.600382	sp|Q9Y264|ANGP4_HUMAN	Angiopoietin-4 OS=Homo sapiens GN=ANGPT4 PE=1 SV=1	2e-23	1	42.3529	2e-23	170
comp244938_c0_seq2	len=617	-1.87061	5.14845	0.00772852	0.600382	sp|P38977|ANTA_HYDVU	Antistasin OS=Hydra vulgaris PE=2 SV=1	7e-06	1	30.2752	7e-06	109
comp247393_c0_seq1	len=1173	1.37938	2.82498	0.00795311	0.612666	sp|P31326|OTC_LITCT	Ornithine carbamoyltransferase		NA			NA
comp245612_c0_seq1	len=237	1.53261	0.862052	0.00797959	0.613598	sp|Q680I5|GAGT2_ARATH	Gamma-glutamyltranspeptidase 2 OS=Arabidopsis thaliana GN=GGT2 PE=2 SV=1	1e-11	1	38.8889	1e-11	72
comp252804_c4_seq1	len=205	-1.35861	0.553355	0.00807201	0.614506	sp|Q91ZA3|PCCA_MOUSE	Propionyl-CoA carboxylase alpha chain		NA			NA
comp239382_c0_seq1	len=658	-1.71486	2.36403	0.00822349	0.62045	sp|Q8TD10|MIPO1_HUMAN	Mirror-image polydactyly gene 1 protein OS=Homo sapiens GN=MIPOL1 PE=2 SV=1	9e-18	1	33.1361	9e-18	169
comp187465_c0_seq1	len=274	1.45024	0.275594	0.00832952	0.625121	sp|Q6QR59|F115E_MOUSE	Protein FAM115E OS=Mus musculus GN=Fam115e PE=1 SV=1	3e-07	1	30.2326	3e-07	86
comp237464_c1_seq1	len=419	-1.63635	1.07988	0.00843787	0.630457	sp|O89033|CDC6_MOUSE	Cell division control protein 6 homolog OS=Mus musculus GN=Cdc6 PE=2 SV=2	2e-17	1	39.604	2e-17	101
comp250937_c1_seq3	len=1812	-2.52159	1.55855	0.00879857	0.643727	sp|A2AAJ9|OBSCN_MOUSE	Obscurin OS=Mus musculus GN=Obscn PE=2 SV=2	1e-14	1	21.4765	1e-14	447
comp217426_c0_seq1	len=432	1.75973	2.2629	0.0089544	0.648268	sp|O18992|CP2DJ_CALJA	Cytochrome P450 2D19 OS=Callithrix jacchus GN=CYP2D19 PE=2 SV=1	5e-12	1	42.3077	5e-12	78
comp258414_c1_seq1	len=353	-1.51805	0.0278905	0.00905062	0.652843	sp|A7SWD3|GID8_NEMVE	Glucose-induced degradation protein 8 homolog OS=Nematostella vectensis GN=v1g247787 PE=3 SV=1	7e-11	1	45.4545	7e-11	55
comp250663_c0_seq1	len=1451	-1.88216	6.71812	0.00910792	0.653396	sp|P24787|NEUV_CHICK	Vasotocin-neurophysin VT OS=Gallus gallus PE=2 SV=1	2e-34	1	50.8333	2e-34	120
comp261970_c0_seq2	len=3776	2.07156	0.390248	0.00919498	0.656237	sp|Q921M4|GOGA2_MOUSE	Golgin subfamily A member 2 OS=Mus musculus GN=Golga2 PE=1 SV=3	2e-32	1	22.7468	2e-32	699
comp179241_c0_seq1	len=224	1.36735	0.938597	0.00924037	0.656933	sp|P30714|AT1A1_BUFMA	Sodium/potassium-transporting ATPase subunit alpha-1 OS=Bufo marinus GN=ATP1A1 PE=1 SV=2	5e-39	1	90.5405	5e-39	74
comp258676_c0_seq7	len=1698	-1.42445	2.19445	0.00934244	0.65902	sp|Q7Z5N4|SDK1_HUMAN	Protein sidekick-1 OS=Homo sapiens GN=SDK1 PE=1 SV=3	8e-15	1	24.6445	8e-15	422
[truncated: 1,793 more rows]
