# Supplementary material for: Toxicogenomics in a soil sentinel exposure to Zn nanoparticles and ions reveals the comparative role of toxicokinetic and toxicodynamic mechanisms
Source: Royal Society of Chemistry journal article supplement (doi:10.1039/c9en01124b), 2020-01-01
Supplement: c9en01124b8.xlsx [file c9en01124b8.xlsx]

## Sheet: NP vs ion
Category	Term	Count	%	PValue	Genes	List Total	Pop Hits	Pop Total	Fold Enrichment	Bonferroni	Benjamini	FDR
GOTERM_CC_FAT	GO:0005576~extracellular region	52	15.2047	2.31e-07	Q8N2E2, P0C6B8, Q08830, Q9ES30, P35003, P10079, Q05707, P82977, P28798, P23352, P42788, P98164, O62650, P38977, Q18823, P31696, Q9VEN1, A2AX52, Q9SF85, Q6MZW2, O15232, Q75N90, O08746, Q2QI47, Q8K4G1, O00468, Q868Z9, Q2PC93, Q6YHK3, Q6L6Q5, Q60847, Q9FGY1, Q3KPV7, Q4LDE5, O02350, A7X3Z0, Q7RTY7, Q60467, P24787, P23142, Q2VQV9, Q4VM07, Q99PW6, O08523, P39059, P07911, P00765, O73775, P27590, P19137,…	232	1011	9523	2.11124	5.92e-05	5.92e-05	0.000302
GOTERM_CC_FAT	GO:0044421~extracellular region part	32	9.35673	2.98e-06	O08746, Q2QI47, Q8K4G1, O00468, Q2PC93, Q868Z9, Q6YHK3, Q60847, O02350, Q08830, P35003, Q05707, P10079, Q60467, P28798, P98164, P23352, Q18823, P23142, Q2VQV9, Q99PW6, P31696, O08523, Q9VEN1, P39059, A2AX52, P00765, O15232, O73775, P19137, Q75N90	232	521	9523	2.52115	0.000763	0.000382	0.00389018
GOTERM_CC_FAT	GO:0005578~proteinaceous extracellular matrix	21	6.14035	2.18e-05	Q60467, O08746, P23352, Q2QI47, Q8K4G1, Q18823, O00468, Q868Z9, P23142, Q99PW6, P31696, O08523, Q60847, P39059, A2AX52, O15232, O73775, P19137, Q05707, P10079, Q75N90	232	288	9523	2.99304	0.00557379	0.00186139	0.0284656
GOTERM_MF_FAT	GO:0005201~extracellular matrix structural constituent	10	2.92398	2.4e-05	Q60467, P23352, O15232, Q868Z9, P19137, P23142, Q05707, Q75N90, O08523, P39059	250	68	10797	6.35118	0.0102025	0.0102025	0.0338104
GOTERM_CC_FAT	GO:0031012~extracellular matrix	21	6.14035	3.6e-05	Q60467, O08746, P23352, Q2QI47, Q8K4G1, Q18823, O00468, Q868Z9, P23142, Q99PW6, P31696, O08523, Q60847, P39059, A2AX52, O15232, O73775, P19137, Q05707, P10079, Q75N90	232	298	9523	2.8926	0.00917866	0.00230261	0.0469566
GOTERM_MF_FAT	GO:0005509~calcium ion binding	40	11.6959	0.000145	P54357, P0C6B8, Q8K4G1, P04572, Q9Z0M6, Q2PC93, P16230, Q70E20, P97607, O60494, Q4LDE5, Q9Y4C0, Q9R0N7, Q01705, P10079, Q7RTY7, P98164, A5WW21, O23184, P23377, P23142, Q9Z309, Q99PW6, P46939, P05434, A2ARV4, P07911, Q8TER0, O16025, Q9HCF6, Q6MZW2, O70244, P00765, O73775, P27590, A7DZP8, Q32LT7, Q9JLB4, Q75N90, P34576	250	922	10797	1.87367	0.0600992	0.0305152	0.204177
GOTERM_BP_FAT	GO:0042953~lipoprotein transport	4	1.16959	0.000209	P98164, O60494, O70244, Q9JLB4	245	6	10936	29.7578	0.249408	0.249408	0.34266
GOTERM_CC_FAT	GO:0045177~apical part of cell	12	3.50877	0.00022	P07911, A2ARV4, P17900, P98164, O60494, Q2QI47, O70244, P27590, Q9Y6N9, Q9JLB4, Q8C8R3, Q01484	232	125	9523	3.94055	0.0547782	0.0112039	0.286536
GOTERM_CC_FAT	GO:0016324~apical plasma membrane	10	2.92398	0.000376	P07911, A2ARV4, P98164, O60494, Q2QI47, O70244, P27590, Q9JLB4, Q8C8R3, Q01484	232	92	9523	4.46168	0.0917616	0.0159134	0.489044
GOTERM_BP_FAT	GO:0007155~cell adhesion	25	7.30994	0.000635	O35136, Q9BWV1, P0C6B8, Q9Z0M6, Q2PC93, Q60847, Q70E20, O42414, Q4LDE5, Q9Y4C0, Q24372, Q05707, P35331, Q60467, P23352, A0JM12, Q18823, Q4VM07, O08523, P39059, Q8TER0, A2AX52, Q6RUV5, P19137, P34576	245	523	10936	2.13369	0.582036	0.353498	1.03829
GOTERM_BP_FAT	GO:0022610~biological adhesion	25	7.30994	0.000665	O35136, Q9BWV1, P0C6B8, Q9Z0M6, Q2PC93, Q60847, Q70E20, O42414, Q4LDE5, Q9Y4C0, Q24372, Q05707, P35331, Q60467, P23352, A0JM12, Q18823, Q4VM07, O08523, P39059, Q8TER0, A2AX52, Q6RUV5, P19137, P34576	245	525	10936	2.12556	0.598831	0.262476	1.08684
GOTERM_MF_FAT	GO:0030414~peptidase inhibitor activity	9	2.63158	0.00116756	P82977, Q3KPV7, P23352, P38977, P23377, Q868Z9, Q2PC93, Q6YHK3, P13696	250	91	10797	4.27134	0.392766	0.153191	1.63151
GOTERM_CC_FAT	GO:0005903~brush border	6	1.75439	0.00144105	A2ARV4, P98164, O60494, O70247, O70244, Q9JLB4	232	35	9523	7.0367	0.308695	0.0513726	1.86283
GOTERM_CC_FAT	GO:0044420~extracellular matrix part	10	2.92398	0.00188166	Q60467, Q2QI47, O73775, O00468, Q868Z9, P19137, Q05707, P10079, P31696, P39059	232	115	9523	3.56934	0.382551	0.0584895	2.42597
GOTERM_MF_FAT	GO:0004867~serine-type endopeptidase inhibitor activity	7	2.04678	0.0022961	P82977, P23352, P38977, P23377, Q868Z9, Q6YHK3, P13696	250	59	10797	5.124	0.625274	0.217601	3.18494
GOTERM_BP_FAT	GO:0043062~extracellular structure organization	11	3.21637	0.00355222	O42414, Q9Y4C0, O73775, O00468, Q868Z9, Q05707, P31696, P46939, P22771, Q9VEN1, Q9UBV7	245	163	10936	3.01229	0.992474	0.705466	5.68208
GOTERM_MF_FAT	GO:0046906~tetrapyrrole binding	11	3.21637	0.00410683	Q4PJW3, O60494, Q9DBW0, Q4V8D1, P70085, O70244, Q5XIU9, P00185, P10610, Q7Z449, Q9JLB4	250	161	10797	2.95073	0.827478	0.29633	5.62988
GOTERM_MF_FAT	GO:0043167~ion binding	114	33.3333	0.00610588	P54357, P08955, Q9BRZ2, Q23985, Q5XIU9, P0C6B8, Q9Z0M6, Q7Z449, O94264, Q70E20, O60494, Q9R0N7, P10076, P50876, Q9V4M2, P10079, P41962, P98164, P42788, Q5SVZ6, P10610, P46939, C3XR70, Q8W4N3, Q9SF85, Q6MZW2, O75132, Q7LHG5, P47990, P35790, Q96MU6, Q6UJY2, P04572, Q12852, Q868Z9, Q640B4, Q9MYS6, Q0P5B3, Q4LDE5, O02350, P22771, Q7RTY7, A5WW21, P51789, P23377, Q9LIG0, Q9Z309, Q4VM07, Q8IY84, Q99PW6,…	250	4050	10797	1.21566	0.926847	0.353296	8.26241
GOTERM_CC_FAT	GO:0030286~dynein complex	6	1.75439	0.00643421	Q27802, Q8BW94, Q8IVF4, Q8VHE6, Q96JB1, Q8TE73	232	49	9523	5.02621	0.808426	0.167739	8.07246
GOTERM_MF_FAT	GO:0004857~enzyme inhibitor activity	10	2.92398	0.00696287	P82977, Q3KPV7, P23352, P38977, P23377, Q868Z9, Q2PC93, P42773, Q6YHK3, P13696	250	147	10797	2.93796	0.949387	0.347028	9.36994
GOTERM_BP_FAT	GO:0001539~ciliary or flagellar motility	4	1.16959	0.00698657	Q8VHE6, Q96JB1, P05434, Q8TE73	245	18	10936	9.91927	0.999934	0.854364	10.8861
GOTERM_BP_FAT	GO:0006898~receptor-mediated endocytosis	5	1.46199	0.00735534	A2ARV4, P98164, O60494, O70244, Q9JLB4	245	35	10936	6.37668	0.999961	0.815591	11.4286
GOTERM_CC_FAT	GO:0005886~plasma membrane	71	20.7602	0.00858177	Q96RY7, Q811G0, Q9Z0M6, Q01484, P97607, Q8C419, P17900, O60494, O42414, Q9R0N7, Q9V4M2, Q01705, Q27802, P98164, Q9H4G0, Q7TSU7, A0JM12, Q49B93, Q03206, Q8BGD4, P30430, P28572, P46939, O70247, Q9SF85, O70244, A7Y2W8, Q32LT7, Q3UHL1, Q5BJT2, Q21974, P34576, Q9BWV1, O35136, P42519, Q2QI47, O88572, Q6UJY2, Q12852, Q6YHK3, Q8R420, Q9MYS6, P16066, Q3TZZ7, P43404, Q9Y4C0, Q24372, Q460N5, Q13733, P22771,…	232	2226	9523	1.30924	0.889905	0.197996	10.6299
GOTERM_MF_FAT	GO:0004866~endopeptidase inhibitor activity	7	2.04678	0.00968338	P82977, P23352, P38977, P23377, Q868Z9, Q6YHK3, P13696	250	79	10797	3.82678	0.984313	0.405104	12.804
GOTERM_CC_FAT	GO:0005604~basement membrane	7	2.04678	0.0101606	Q2QI47, O73775, O00468, Q868Z9, P19137, P31696, P39059	232	76	9523	3.78068	0.92679	0.211541	12.468
GOTERM_CC_FAT	GO:0005930~axoneme	6	1.75439	0.0112471	Q27802, Q8BW94, Q8IVF4, Q8VHE6, Q96JB1, Q8TE73	232	56	9523	4.39794	0.944733	0.214393	13.7126
GOTERM_BP_FAT	GO:0050808~synapse organization	6	1.75439	0.0157223	O42414, Q9Y4C0, O00468, P31696, P46939, P22771	245	66	10936	4.05788	1	0.955425	22.9343
GOTERM_MF_FAT	GO:0031419~cobalamin binding	3	0.877193	0.0171365	O60494, O70244, Q9JLB4	250	9	10797	14.396	0.999377	0.559603	21.6029
GOTERM_CC_FAT	GO:0005615~extracellular space	13	3.80117	0.0181618	P28798, P98164, P23352, O02350, P00765, Q08830, P35003, Q2PC93, Q2VQV9, P23142, P10079, Q6YHK3	232	249	9523	2.14304	0.990833	0.302975	21.2582
GOTERM_CC_FAT	GO:0044463~cell projection part	11	3.21637	0.0217005	Q27802, Q8BW94, P98164, O60494, O70247, Q811G0, Q8IVF4, Q12852, Q8VHE6, Q96JB1, Q8TE73	232	197	9523	2.29199	0.996363	0.330469	24.8795
GOTERM_MF_FAT	GO:0043169~cation binding	109	31.8713	0.0220306	P54357, P08955, Q9BRZ2, Q23985, Q5XIU9, P0C6B8, Q9Z0M6, Q7Z449, O94264, Q70E20, O60494, Q9R0N7, P10076, P50876, Q9V4M2, P10079, P41962, P98164, P42788, Q5SVZ6, P10610, P46939, C3XR70, Q8W4N3, Q9SF85, Q6MZW2, O75132, Q7LHG5, P47990, P35790, Q96MU6, Q6UJY2, Q12852, P04572, Q868Z9, Q640B4, Q9MYS6, Q0P5B3, Q4LDE5, O02350, Q7RTY7, A5WW21, P23377, Q9LIG0, Q9Z309, Q4VM07, Q8IY84, Q99PW6, P15620, P05434,…	250	3999	10797	1.17717	0.999926	0.613731	26.9241
GOTERM_CC_FAT	GO:0005764~lysosome	11	3.21637	0.0245426	Q63ZL3, P10619, P17900, P98164, O60494, O70244, Q9R0N7, P05689, Q719N3, Q28709, Q9JLB4	232	201	9523	2.24638	0.998273	0.345633	27.676
GOTERM_CC_FAT	GO:0005905~coated pit	5	1.46199	0.0266563	A2ARV4, P98164, O60494, O70244, Q9JLB4	232	47	9523	4.36675	0.999009	0.350978	29.693
GOTERM_CC_FAT	GO:0000323~lytic vacuole	11	3.21637	0.0268406	Q63ZL3, P10619, P17900, P98164, O60494, O70244, Q9R0N7, P05689, Q719N3, Q28709, Q9JLB4	232	204	9523	2.21334	0.999056	0.336158	29.8664
GOTERM_CC_FAT	GO:0005858~axonemal dynein complex	3	0.877193	0.0278947	Q8VHE6, Q96JB1, Q8TE73	232	11	9523	11.1947	0.999285	0.331262	30.8506
GOTERM_BP_FAT	GO:0006040~amino sugar metabolic process	3	0.877193	0.032889	Q9V730, Q8RD30, Q2W2T7	245	13	10936	10.3008	1	0.996797	42.2908
GOTERM_MF_FAT	GO:0031404~chloride ion binding	6	1.75439	0.0339141	P16066, P51789, P18293, P17342, Q32LT7, P22771	250	78	10797	3.32215	1	0.737978	38.4805
GOTERM_CC_FAT	GO:0042995~cell projection	22	6.43275	0.0399575	Q27802, Q8BW94, P98164, O35136, Q2QI47, Q811G0, Q6UJY2, Q12852, Q8VHE6, P46939, Q96JB1, P05434, A2ARV4, O60494, O70247, O42414, O70244, Q8IVF4, Q6RUV5, Q9Y6N9, Q9JLB4, Q8TE73	232	576	9523	1.56778	0.999971	0.422719	41.2406
GOTERM_BP_FAT	GO:0048608~reproductive structure development	6	1.75439	0.0412287	Q9FGY1, O62650, Q23120, Q9QZC4, Q01705, P97607	245	85	10936	3.15083	1	0.998384	49.949
GOTERM_CC_FAT	GO:0009986~cell surface	11	3.21637	0.0438059	O60494, P23352, Q03206, P23377, O00468, Q24372, Q99PW6, P31696, O08523, Q00649, Q8CA03	232	222	9523	2.03388	0.99999	0.436376	44.2389
GOTERM_BP_FAT	GO:0009254~peptidoglycan turnover	2	0.584795	0.0441274	Q8RD30, Q2W2T7	245	2	10936	44.6367	1	0.997973	52.3793
GOTERM_MF_FAT	GO:0046872~metal ion binding	105	30.7018	0.0452939	P54357, P08955, Q9BRZ2, Q23985, Q5XIU9, P0C6B8, Q9Z0M6, Q7Z449, O94264, Q70E20, O60494, Q9R0N7, P10076, P50876, Q9V4M2, P10079, P41962, P98164, P42788, Q5SVZ6, P10610, P46939, C3XR70, Q8W4N3, Q9SF85, Q6MZW2, O75132, Q7LHG5, P47990, Q96MU6, Q6UJY2, Q12852, P04572, Q868Z9, Q640B4, Q9MYS6, Q0P5B3, Q4LDE5, O02350, Q7RTY7, A5WW21, P23377, Q9LIG0, Q4VM07, Q8IY84, Q9Z309, Q99PW6, P05434, P15620, Q8TER0,…	250	3934	10797	1.1527	1	0.807825	47.9341
GOTERM_BP_FAT	GO:0007009~plasma membrane organization	3	0.877193	0.0484395	Q9R0N7, O00468, P31696	245	16	10936	8.36939	1	0.997975	55.7905
GOTERM_BP_FAT	GO:0051147~regulation of muscle cell differentiation	4	1.16959	0.0488772	Q14012, Q9BWV1, O00468, P31696	245	37	10936	4.82559	1	0.996778	56.1236
GOTERM_MF_FAT	GO:0043168~anion binding	6	1.75439	0.0524731	P16066, P51789, P18293, P17342, Q32LT7, P22771	250	88	10797	2.94464	1	0.829736	53.1839
GOTERM_BP_FAT	GO:0060538~skeletal muscle organ development	5	1.46199	0.0543239	O00468, Q9V4M2, P31696, P46939, Q62141	245	64	10936	3.48724	1	0.99727	60.0764
GOTERM_CC_FAT	GO:0030139~endocytic vesicle	5	1.46199	0.0544809	A2ARV4, P98164, O60494, O70244, Q9JLB4	232	59	9523	3.47859	0.999999	0.494862	51.8324
GOTERM_CC_FAT	GO:0044447~axoneme part	3	0.877193	0.0562362	Q8VHE6, Q96JB1, Q8TE73	232	16	9523	7.69639	1	0.490082	52.9854
GOTERM_BP_FAT	GO:0016051~carbohydrate biosynthetic process	6	1.75439	0.0567727	Q9V730, Q9Z2Z9, O17732, Q04446, P35574, Q9UBV7	245	93	10936	2.87979	1	0.996773	61.7424
GOTERM_MF_FAT	GO:0020037~heme binding	8	2.33918	0.0620997	Q4PJW3, Q9DBW0, Q4V8D1, P70085, Q5XIU9, P00185, P10610, Q7Z449	250	152	10797	2.27305	1	0.858493	59.4539
GOTERM_CC_FAT	GO:0031526~brush border membrane	3	0.877193	0.062741	P98164, O60494, O70247	232	17	9523	7.24366	1	0.513833	57.0399
GOTERM_MF_FAT	GO:0050897~cobalt ion binding	3	0.877193	0.0636056	O60494, O70244, Q9JLB4	250	18	10797	7.198	1	0.845998	60.361
GOTERM_MF_FAT	GO:0005198~structural molecule activity	16	4.67836	0.0665493	Q60467, P23352, Q9H4G0, O00468, Q868Z9, P23142, Q60847, O08523, P39059, Q9PU47, O15232, Q29IK4, Q9BQE3, P19137, Q05707, Q75N90	250	424	10797	1.62974	1	0.840848	62.08
GOTERM_MF_FAT	GO:0005506~iron ion binding	14	4.09357	0.0675831	Q9DBW0, Q4V8D1, Q5XIU9, P70085, P10610, Q9LIG0, Q7Z449, A8WGT1, Q4PJW3, O16025, Q9UMS0, P00185, Q5ZLR5, P47990	250	355	10797	1.70319	1	0.827544	62.667
GOTERM_MF_FAT	GO:0009055~electron carrier activity	11	3.21637	0.070843	Q4PJW3, Q9DBW0, Q2KHZ9, Q4V8D1, P70085, P00185, P10610, Q9LIG0, Q7Z449, Q5ZLR5, P47990	250	254	10797	1.87035	1	0.825014	64.4634
GOTERM_CC_FAT	GO:0042599~lamellar body	2	0.584795	0.0710275	Q8R420, Q99758	232	3	9523	27.3649	1	0.544281	61.7373
GOTERM_BP_FAT	GO:0007018~microtubule-based movement	7	2.04678	0.0729005	Q27802, Q8BW94, Q8IVF4, Q9BQE3, Q8VHE6, Q96JB1, Q8TE73	245	131	10936	2.38517	1	0.999026	71.1869
GOTERM_MF_FAT	GO:0008236~serine-type peptidase activity	8	2.33918	0.0750796	Q9NQE7, P10619, P34528, P00765, P23377, P35003, P30430, Q7RTY7	250	159	10797	2.17298	1	0.826923	66.6781
GOTERM_MF_FAT	GO:0003777~microtubule motor activity	6	1.75439	0.0759414	Q27802, Q8BW94, Q8IVF4, Q8VHE6, Q96JB1, Q8TE73	250	98	10797	2.64416	1	0.814782	67.1127
GOTERM_BP_FAT	GO:0016044~membrane organization	13	3.80117	0.0762303	P35331, P98164, O88572, A0JM12, Q03206, O00468, P31696, A2ARV4, O60494, O70244, Q9R0N7, Q6RUV5, Q9JLB4	245	338	10936	1.7168	1	0.998896	72.8417
GOTERM_MF_FAT	GO:0008528~peptide receptor activity, G-protein coupled	4	1.16959	0.0762372	P16066, Q9VZW5, P18293, P17342	250	43	10797	4.01749	1	0.800598	67.2606
GOTERM_MF_FAT	GO:0017171~serine hydrolase activity	8	2.33918	0.0790609	Q9NQE7, P10619, P34528, P00765, P23377, P35003, P30430, Q7RTY7	250	161	10797	2.14599	1	0.797812	68.6419
GOTERM_MF_FAT	GO:0001653~peptide receptor activity	4	1.16959	0.0804832	P16066, Q9VZW5, P18293, P17342	250	44	10797	3.92618	1	0.789391	69.3169
GOTERM_CC_FAT	GO:0030017~sarcomere	5	1.46199	0.0826803	Q14315, Q8C8R3, A2AAJ9, Q01484, Q00649	232	68	9523	3.01819	1	0.586751	67.5442
GOTERM_BP_FAT	GO:0030203~glycosaminoglycan metabolic process	4	1.16959	0.0827227	Q9V730, Q8RD30, Q2W2T7, Q9UBV7	245	46	10936	3.88146	1	0.999069	75.8149
GOTERM_BP_FAT	GO:0000271~polysaccharide biosynthetic process	4	1.16959	0.0827227	Q9V730, Q04446, P35574, Q9UBV7	245	46	10936	3.88146	1	0.999069	75.8149
GOTERM_BP_FAT	GO:0007416~synaptogenesis	3	0.877193	0.0855238	Q9Y4C0, O00468, P22771	245	22	10936	6.08683	1	0.998913	77.0008
GOTERM_BP_FAT	GO:0030828~positive regulation of cGMP biosynthetic process	2	0.584795	0.0863153	P16066, P18293	245	4	10936	22.3184	1	0.998538	77.3258
GOTERM_BP_FAT	GO:0030823~regulation of cGMP metabolic process	2	0.584795	0.0863153	P16066, P18293	245	4	10936	22.3184	1	0.998538	77.3258
GOTERM_BP_FAT	GO:0030826~regulation of cGMP biosynthetic process	2	0.584795	0.0863153	P16066, P18293	245	4	10936	22.3184	1	0.998538	77.3258
GOTERM_BP_FAT	GO:0030825~positive regulation of cGMP metabolic process	2	0.584795	0.0863153	P16066, P18293	245	4	10936	22.3184	1	0.998538	77.3258
GOTERM_CC_FAT	GO:0005773~vacuole	11	3.21637	0.0882522	Q63ZL3, P10619, P17900, P98164, O60494, O70244, Q9R0N7, P05689, Q719N3, Q28709, Q9JLB4	232	253	9523	1.78467	1	0.597357	70.0229
GOTERM_MF_FAT	GO:0005525~GTP binding	13	3.80117	0.0916845	P61214, Q96HU8, A5WW21, P30683, P51643, Q03206, P16066, Q96PP9, Q6RUV5, P18293, Q9BQE3, Q8SVJ8, Q96E17	250	337	10797	1.66601	1	0.819298	74.1805
GOTERM_CC_FAT	GO:0031988~membrane-bounded vesicle	16	4.67836	0.0922656	P98164, P23377, A7E3W5, A2ARV4, Q8R420, Q9NQE7, O60494, O70247, O70244, Q9R0N7, P27590, Q6RUV5, P10079, Q9JLB4, Q96E17, Q99758	232	424	9523	1.54896	1	0.600619	71.6987
GOTERM_CC_FAT	GO:0031224~intrinsic to membrane	100	29.2398	0.0944164	Q96RY7, Q5XIU9, Q9Z0M6, Q7Z449, P17900, Q9R0N7, P50876, Q69P80, Q6R5N8, Q6DFT6, P98164, Q7TSU7, Q8BGD4, P30430, P28572, Q91147, Q63ZL3, Q6P1Q0, Q64487, A7Y2W8, Q5T6L9, O35136, O88572, Q6UJY2, Q9MYS6, Q8R420, B2GV54, Q24372, P22771, Q0P4P2, Q9VZW5, Q0IIV2, Q9JLJ4, Q7KZN9, P51789, P23377, Q99PW6, O08523, P33527, Q28709, P58681, Q60519, Q5F383, P97607, Q8C419, Q9BQI7, O42414, Q6DHB5, Q01705, Q4V8D1,…	232	3664	9523	1.12029	1	0.596165	72.5607
GOTERM_BP_FAT	GO:0002164~larval development	5	1.46199	0.0964018	Q03206, Q18823, Q23120, Q9V4M2, P34576	245	78	10936	2.86133	1	0.999055	81.108
GOTERM_CC_FAT	GO:0031982~vesicle	19	5.55556	0.0966993	P98164, Q0IIV2, P23377, A7E3W5, A2ARV4, Q8R420, Q9NQE7, Q9MYS6, O60494, O70247, O70244, Q9R0N7, P27590, Q6RUV5, Q3UHL1, P10079, Q9JLB4, Q96E17, Q99758	232	533	9523	1.46323	1	0.59252	73.4491
GOTERM_MF_FAT	GO:0019842~vitamin binding	7	2.04678	0.0971257	O60494, O70244, O17732, Q6DCX5, O88533, Q9JLB4, Q91ZA3	250	137	10797	2.20669	1	0.825372	76.275
GOTERM_CC_FAT	GO:0005626~insoluble fraction	21	6.14035	0.0975733	P98164, Q4V8D1, O88572, Q9JLJ4, Q12852, P10610, Q7Z449, P46939, P97607, A2ARV4, Q4PJW3, O60494, P55006, B2GV54, O70244, P33527, Q6RUV5, P17342, P00185, Q99758, Q00649	232	605	9523	1.42479	1	0.583596	73.7821
GOTERM_CC_FAT	GO:0005605~basal lamina	3	0.877193	0.098568	O00468, P19137, P31696	232	22	9523	5.59737	1	0.575543	74.1564

## Sheet: ion vs control
Category	Term	Count	%	PValue	Genes	List Total	Pop Hits	Pop Total	Fold Enrichment	Bonferroni	Benjamini	FDR
GOTERM_MF_FAT	GO:0005385~zinc ion transmembrane transporter activity	5	1.77305	7.17e-05	Q6PEH9, P20107, Q9VSL7, Q60738, Q78IQ7	201	13	10797	20.6602	0.0290931	0.0290931	0.100334
GOTERM_BP_FAT	GO:0006898~receptor-mediated endocytosis	6	2.12766	0.000386	A2ARV4, P98164, O60494, O70244, P39052, Q3SYV4	199	35	10936	9.42082	0.393001	0.393001	0.628014
GOTERM_CC_FAT	GO:0005903~brush border	6	2.12766	0.000468	A2ARV4, P98164, O60494, O70247, O70244, Q91VE0	181	35	9523	9.01942	0.10158	0.10158	0.597485
GOTERM_BP_FAT	GO:0006829~zinc ion transport	5	1.77305	0.000705	Q6PEH9, P20107, Q9VSL7, Q60738, Q78IQ7	199	23	10936	11.9467	0.598076	0.366026	1.14366
GOTERM_CC_FAT	GO:0005886~plasma membrane	61	21.6312	0.00138887	O97831, P19218, P07314, P49815, Q01484, B3MFV7, Q8C419, O60494, O42414, Q9VSL7, Q64542, Q9V4M2, Q8TDY8, P98164, Q7TSU7, A0JM12, Q645M6, Q2XWK0, O94985, P35580, O70247, Q9SF85, Q60738, O70244, Q3UHL1, Q9HAR2, Q21974, O35136, P42519, Q5RBE1, O88572, Q91X85, Q804S5, Q8R420, Q9MYS6, Q3TZZ7, Q03720, Q1EHB4, Q24372, Q460N5, P42346, P54939, Q13733, P22771, P14448, O14772, Q0IIV2, P39052, Q9VUL9, Q91VE0,…	181	2226	9523	1.44178	0.272595	0.14712	1.76483
GOTERM_MF_FAT	GO:0015082~di-, tri-valent inorganic cation transmembrane transporter activity	6	2.12766	0.00223473	Q6PEH9, P20107, Q9VSL7, Q60738, Q78IQ7, Q64542	201	50	10797	6.44597	0.602174	0.369265	3.08533
GOTERM_MF_FAT	GO:0046915~transition metal ion transmembrane transporter activity	5	1.77305	0.00273685	Q6PEH9, P20107, Q9VSL7, Q60738, Q78IQ7	201	32	10797	8.39319	0.676684	0.313655	3.76628
GOTERM_CC_FAT	GO:0031526~brush border membrane	4	1.41844	0.00371516	P98164, O60494, O70247, Q91VE0	181	17	9523	12.3796	0.573591	0.247323	4.65663
GOTERM_CC_FAT	GO:0005576~extracellular region	32	11.3475	0.00441702	O08746, Q8N2E2, P19218, Q18439, Q60847, P00528, Q9FGY1, O15072, Q4LDE5, Q3LX99, Q9H4G4, Q6DFV8, Q9U3S9, O35701, P10079, P14448, A1KZ92, P98164, O93427, Q5RC26, Q2VQV9, Q9Y264, P04069, Q9SF85, Q7SIB3, Q8WU39, Q18206, Q9D733, Q9Y646, O75095, Q6RY07	181	1011	9523	1.66531	0.63714	0.223869	5.51357
GOTERM_BP_FAT	GO:0042953~lipoprotein transport	3	1.06383	0.00466343	P98164, O60494, O70244	199	6	10936	27.4774	0.997628	0.866632	7.34344
GOTERM_MF_FAT	GO:0004715~non-membrane spanning protein tyrosine kinase activity	6	2.12766	0.0049644	P13406, P42689, Q13627, P35991, P00528	201	60	10797	5.37164	0.87132	0.401067	6.73401
GOTERM_CC_FAT	GO:0030139~endocytic vesicle	6	2.12766	0.00500887	A2ARV4, P98164, O60494, O70244, P39052, Q804S5	181	59	9523	5.3505	0.683336	0.205453	6.23067
GOTERM_CC_FAT	GO:0031982~vesicle	20	7.0922	0.00566694	P98164, Q9WVE8, Q0IIV2, P39052, A7E3W5, Q804S5, Q6NZQ8, Q2XWK0, A2ARV4, Q9NQE7, Q9MYS6, Q8R420, O60494, O70247, Q78IQ7, O70244, Q3UHL1, P10079, P35991, Q9NQ86	181	533	9523	1.97423	0.727855	0.194992	7.02211
GOTERM_BP_FAT	GO:0010324~membrane invagination	11	3.90071	0.00593047	A2ARV4, Q8BH43, P98164, O60494, Q9WVE8, O70244, A0JM12, O88572, P39052, Q3SYV4, P49815	199	216	10936	2.79862	0.999543	0.853793	9.24935
GOTERM_BP_FAT	GO:0006897~endocytosis	11	3.90071	0.00593047	A2ARV4, Q8BH43, P98164, O60494, Q9WVE8, O70244, A0JM12, O88572, P39052, Q3SYV4, P49815	199	216	10936	2.79862	0.999543	0.853793	9.24935
GOTERM_BP_FAT	GO:0030001~metal ion transport	16	5.67376	0.00623289	P20107, Q96T55, Q6PEH9, Q9MYS6, O70247, Q9VSL7, Q78IQ7, Q60738, Q64542, Q03720, Q5BL81, Q1EHB4, Q7T384, Q13733, Q21974, Q92911	199	401	10936	2.19271	0.999692	0.801481	9.69878
GOTERM_BP_FAT	GO:0006882~cellular zinc ion homeostasis	3	1.06383	0.00645124	P20107, Q60738, Q78IQ7	199	7	10936	23.552	0.999768	0.752104	10.022
GOTERM_MF_FAT	GO:0004706~JUN kinase kinase kinase activity	3	1.06383	0.00674373	Q02779, Q95UN8, P80192	201	7	10797	23.0213	0.938445	0.427398	9.04328
GOTERM_CC_FAT	GO:0031410~cytoplasmic vesicle	19	6.73759	0.00808251	P98164, Q9WVE8, Q0IIV2, P39052, A7E3W5, Q804S5, Q6NZQ8, Q2XWK0, A2ARV4, Q9NQE7, Q9MYS6, Q8R420, O60494, Q78IQ7, O70244, Q3UHL1, P10079, P35991, Q9NQ86	181	512	9523	1.95245	0.84408	0.233168	9.87475
GOTERM_BP_FAT	GO:0010627~regulation of protein kinase cascade	8	2.83688	0.00825004	Q02779, O43734, P49815, Q645M6, P42346, Q95UN8, P39429, P80192	199	127	10936	3.46172	0.999978	0.783512	12.6435
GOTERM_BP_FAT	GO:0055069~zinc ion homeostasis	3	1.06383	0.0084996	P20107, Q60738, Q78IQ7	199	8	10936	20.608	0.999984	0.748326	13.0015
GOTERM_MF_FAT	GO:0042803~protein homodimerization activity	10	3.5461	0.0110654	O60494, Q02779, O70244, O08914, P17342, P49815, Q95UN8, Q804S5, B2GV87, P80192	201	197	10797	2.72672	0.98979	0.53423	14.4329
GOTERM_BP_FAT	GO:0006812~cation transport	17	6.02837	0.0166109	P20107, Q0IIV2, Q96T55, Q6PEH9, Q9MYS6, O70247, Q9VSL7, Q78IQ7, Q60738, Q64542, Q03720, Q5BL81, Q1EHB4, Q7T384, Q13733, Q21974, Q92911	199	491	10936	1.90271	1	0.909868	23.9146
GOTERM_MF_FAT	GO:0022890~inorganic cation transmembrane transporter activity	8	2.83688	0.0194833	Q6PEH9, P20107, Q9VSL7, Q60738, Q0IIV2, Q78IQ7, Q64542, Q13733	201	147	10797	2.92334	0.999698	0.685901	24.0896
GOTERM_BP_FAT	GO:0000041~transition metal ion transport	5	1.77305	0.0195228	Q6PEH9, P20107, Q9VSL7, Q60738, Q78IQ7	199	57	10936	4.82059	1	0.921861	27.5085
GOTERM_MF_FAT	GO:0004713~protein tyrosine kinase activity	10	3.5461	0.0218426	O14772, P13406, Q23023, P42689, Q13627, Q95UN8, P35991, P51841, P00528	201	221	10797	2.43061	0.999888	0.679335	26.6085
GOTERM_MF_FAT	GO:0046983~protein dimerization activity	13	4.60993	0.0231271	Q5SVZ6, Q8BGD7, O08914, P49815, B2GV87, Q804S5, P80192, O60494, Q02779, Q8TEM1, O70244, P17342, Q95UN8	201	337	10797	2.07215	0.999935	0.657384	27.9472
GOTERM_MF_FAT	GO:0031420~alkali metal ion binding	10	3.5461	0.0254095	Q9MYS6, O70247, Q96T55, Q5BL81, Q03720, Q1EHB4, Q7T384, Q21974, Q13733, Q92911	201	227	10797	2.36636	0.999975	0.653683	30.2699
GOTERM_CC_FAT	GO:0016324~apical plasma membrane	6	2.12766	0.0300021	A2ARV4, P98164, O60494, O70244, Q78IQ7, Q01484	181	92	9523	3.4313	0.999066	0.581868	32.3116
GOTERM_MF_FAT	GO:0031402~sodium ion binding	7	2.48227	0.0326902	O70247, Q5BL81, Q1EHB4, Q7T384, Q21974, Q13733, Q92911	201	129	10797	2.91484	0.999999	0.712018	37.2228
GOTERM_MF_FAT	GO:0043167~ion binding	89	31.5603	0.0337946	Q9BRZ2, Q9NX46, Q23985, Q147U1, P16230, Q9C040, O60494, O15072, Q9VSL7, Q64542, Q5BL81, Q9V4M2, Q7T384, P10079, Q5NVN3, A1KZ92, Q86YZ3, Q95078, Q6PAW2, P98164, Q5SVZ6, P20107, Q80V23, P05089, Q96T55, P13406, P10610, P52738, Q6NZQ8, Q0IIF9, O94985, Q8W4N3, Q6PEH9, O70247, Q9SF85, Q18206, O88379, Q60738, Q8N9F8, O70244, Q7LHG5, Q6VVW9, Q9Y646, Q21974, Q6RY07, Q9NQ86, Q96IR2, Q96MU6, P04572, Q18439,…	201	4050	10797	1.18043	0.999999	0.692826	38.2194
GOTERM_BP_FAT	GO:0009967~positive regulation of signal transduction	8	2.83688	0.0368469	Q9V4A7, Q23985, Q5RJ80, O43734, Q645M6, P42346, Q95UN8, Q804S5	199	172	10936	2.55604	1	0.987881	45.805
GOTERM_BP_FAT	GO:0007254~JNK cascade	4	1.41844	0.0376727	Q02779, Q95UN8, P80192, P00528	199	41	10936	5.36144	1	0.98404	46.5582
GOTERM_BP_FAT	GO:0031098~stress-activated protein kinase signaling pathway	4	1.41844	0.0400462	Q02779, Q95UN8, P80192, P00528	199	42	10936	5.23379	1	0.982837	48.6687
GOTERM_MF_FAT	GO:0046872~metal ion binding	86	30.4965	0.0433078	Q9BRZ2, Q9NX46, Q23985, Q147U1, P16230, Q9C040, O60494, O15072, Q9VSL7, Q64542, Q5BL81, Q9V4M2, Q7T384, P10079, Q5NVN3, A1KZ92, Q86YZ3, Q95078, Q6PAW2, P98164, Q5SVZ6, P20107, Q80V23, P05089, Q96T55, P13406, P10610, P52738, Q6NZQ8, Q0IIF9, O94985, Q8W4N3, Q6PEH9, O70247, Q9SF85, Q18206, O88379, Q60738, Q8N9F8, O70244, Q7LHG5, Q6VVW9, Q9Y646, Q21974, Q9NQ86, Q96IR2, Q96MU6, P04572, Q18439, Q640B4,…	201	3934	10797	1.17428	1	0.754174	46.2156
GOTERM_BP_FAT	GO:0016044~membrane organization	12	4.25532	0.0435672	A2ARV4, Q8BH43, P35580, P98164, O60494, Q9WVE8, O70244, A0JM12, O88572, P39052, Q3SYV4, P49815	199	338	10936	1.95106	1	0.983658	51.6561
GOTERM_CC_FAT	GO:0042995~cell projection	18	6.38298	0.0448344	P98164, O35136, Q8VHE6, Q9EQN5, P49815, Q91VE0, O94985, A2ARV4, Q8BH43, P35580, O60494, O70247, O42414, O70244, Q03720, P42346, P54939, Q8TE73	181	576	9523	1.64416	0.999973	0.688747	44.438
GOTERM_BP_FAT	GO:0006814~sodium ion transport	7	2.48227	0.0454984	O70247, Q5BL81, Q1EHB4, Q7T384, Q21974, Q13733, Q92911	199	143	10936	2.69009	1	0.981939	53.2244
GOTERM_MF_FAT	GO:0043169~cation binding	87	30.8511	0.04661	Q9BRZ2, Q9NX46, Q23985, Q147U1, P16230, Q9C040, O60494, O15072, Q9VSL7, Q64542, Q5BL81, Q9V4M2, Q7T384, P10079, Q5NVN3, A1KZ92, Q86YZ3, Q95078, Q6PAW2, P98164, Q5SVZ6, P20107, Q80V23, P05089, Q96T55, P13406, P10610, P52738, Q6NZQ8, Q0IIF9, O94985, Q8W4N3, Q6PEH9, O70247, Q9SF85, Q18206, O88379, Q60738, Q8N9F8, O70244, Q7LHG5, Q6VVW9, Q9Y646, Q21974, Q6RY07, Q9NQ86, Q96IR2, Q96MU6, P04572, Q18439,…	201	3999	10797	1.16862	1	0.75455	48.7586
GOTERM_BP_FAT	GO:0046777~protein amino acid autophosphorylation	5	1.77305	0.0468788	Q02779, Q13627, P42346, Q95UN8, P80192	199	75	10936	3.66365	1	0.979351	54.3161
GOTERM_BP_FAT	GO:0006766~vitamin metabolic process	5	1.77305	0.0468788	A2ARV4, P98164, O70244, Q9CXF0, Q6VVW9	199	75	10936	3.66365	1	0.979351	54.3161
GOTERM_BP_FAT	GO:0016192~vesicle-mediated transport	16	5.67376	0.047081	P98164, P42519, Q9WVE8, Q9DB05, O88572, P51643, A0JM12, P39052, P49815, Q8BH43, A2ARV4, P35580, O60494, O70244, Q3SYV4, Q9NQ86	199	515	10936	1.70733	1	0.974472	54.4739
GOTERM_BP_FAT	GO:0007257~activation of JUN kinase activity	3	1.06383	0.0500497	Q02779, Q95UN8, P80192	199	20	10936	8.24322	1	0.974986	56.7338
GOTERM_BP_FAT	GO:0048870~cell motility	10	3.5461	0.0508098	Q8BH43, P35580, Q9VSL7, O88572, Q3SYV4, Q23023, Q8VHE6, P00516, Q13733, Q8TE73	199	264	10936	2.08162	1	0.971237	57.2952
GOTERM_BP_FAT	GO:0051674~localization of cell	10	3.5461	0.0508098	Q8BH43, P35580, Q9VSL7, O88572, Q3SYV4, Q23023, Q8VHE6, P00516, Q13733, Q8TE73	199	264	10936	2.08162	1	0.971237	57.2952
GOTERM_MF_FAT	GO:0004712~protein serine/threonine/tyrosine kinase activity	3	1.06383	0.0521347	Q9SF85, Q95UN8, P80192	201	20	10797	8.05746	1	0.770223	52.7648
GOTERM_BP_FAT	GO:0010647~positive regulation of cell communication	8	2.83688	0.0569323	Q9V4A7, Q23985, Q5RJ80, O43734, Q645M6, P42346, Q95UN8, Q804S5	199	190	10936	2.31389	1	0.977395	61.5744
GOTERM_CC_FAT	GO:0031988~membrane-bounded vesicle	14	4.96454	0.0583254	P98164, Q9WVE8, P39052, A7E3W5, Q804S5, Q9NQE7, Q8R420, A2ARV4, O60494, O70247, Q78IQ7, O70244, P10079, Q9NQ86	181	424	9523	1.73723	0.999999	0.74746	53.6947
GOTERM_CC_FAT	GO:0031253~cell projection membrane	4	1.41844	0.0587765	P98164, O60494, O70247, Q91VE0	181	47	9523	4.47772	0.999999	0.716645	53.978
GOTERM_CC_FAT	GO:0005905~coated pit	4	1.41844	0.0587765	A2ARV4, P98164, O60494, O70244	181	47	9523	4.47772	0.999999	0.716645	53.978
GOTERM_BP_FAT	GO:0080135~regulation of cellular response to stress	5	1.77305	0.0613098	Q02779, P42346, Q95UN8, P39429, P80192	199	82	10936	3.3509	1	0.979669	64.3835
GOTERM_BP_FAT	GO:0006928~cell motion	12	4.25532	0.064805	Q9V4A7, Q8BH43, P35580, O42414, Q9VSL7, O88572, Q3SYV4, Q23023, Q8VHE6, P00516, Q13733, Q8TE73	199	362	10936	1.82171	1	0.980509	66.4868
GOTERM_BP_FAT	GO:0043507~positive regulation of JUN kinase activity	3	1.06383	0.0693871	Q02779, Q95UN8, P80192	199	24	10936	6.86935	1	0.98245	69.0678
GOTERM_BP_FAT	GO:0006811~ion transport	19	6.73759	0.0696838	P20107, Q0IIV2, Q96T55, Q6PEH9, Q9MYS6, O70247, Q9VSL7, Q78IQ7, Q60738, Q64542, Q03720, Q3LX99, Q5BL81, Q1EHB4, Q7T384, Q21974, Q13733, P22771, Q92911	199	683	10936	1.52876	1	0.979584	69.2283
GOTERM_BP_FAT	GO:0046328~regulation of JNK cascade	4	1.41844	0.0708821	Q02779, Q95UN8, P39429, P80192	199	53	10936	4.14753	1	0.977684	69.8687
GOTERM_BP_FAT	GO:0006468~protein amino acid phosphorylation	20	7.0922	0.0721755	O14772, Q3SZW1, P13406, Q23023, B2GV87, P00516, P80192, P00528, P16065, Q14012, Q9SF85, Q02779, P42689, Q13627, P42346, Q95UN8, Q3UHL1, P35991, P51841	199	733	10936	1.49945	1	0.975898	70.5459
GOTERM_MF_FAT	GO:0042802~identical protein binding	12	4.25532	0.0735502	O60494, Q02779, O70244, O08914, P17342, P49815, Q645M6, Q95UN8, Q804S5, B2GV87, P80192, Q00649	201	362	10797	1.78065	1	0.86015	65.7043
GOTERM_BP_FAT	GO:0007218~neuropeptide signaling pathway	4	1.41844	0.0740931	O97831, Q9HAR2, P22771, B3MFV7	199	54	10936	4.07072	1	0.974942	71.5236
GOTERM_BP_FAT	GO:0070302~regulation of stress-activated protein kinase signaling pathway	4	1.41844	0.0740931	Q02779, Q95UN8, P39429, P80192	199	54	10936	4.07072	1	0.974942	71.5236
GOTERM_MF_FAT	GO:0046914~transition metal ion binding	58	20.5674	0.0753193	Q9BRZ2, Q23985, Q147U1, O60494, Q9C040, Q9VSL7, O15072, Q9V4M2, Q5NVN3, A1KZ92, Q95078, Q6PAW2, Q5SVZ6, P20107, Q80V23, P05089, P10610, P13406, P52738, Q6NZQ8, Q0IIF9, Q8W4N3, Q6PEH9, Q9SF85, Q18206, O88379, Q60738, O70244, Q8N9F8, Q7LHG5, Q6VVW9, Q9Y646, Q9NQ86, Q96IR2, Q96MU6, Q18439, Q804S5, P08154, Q9P792, Q9U3S9, P29375, Q2KID2, Q9LIG0, Q9EQN5, Q8TDB6, Q24732, P39429, P04069, P39428, Q8N806,…	201	2582	10797	1.20664	1	0.8501	66.6104
GOTERM_BP_FAT	GO:0001932~regulation of protein amino acid phosphorylation	5	1.77305	0.0753387	Q3MHH5, Q02779, P42346, Q95UN8, P80192	199	88	10936	3.12243	1	0.973139	72.1423
GOTERM_BP_FAT	GO:0043062~extracellular structure organization	7	2.48227	0.0757463	O15072, O42414, Q9W596, Q5RC26, Q8C8H8, P22771, P00528	199	163	10936	2.36002	1	0.970163	72.342
GOTERM_MF_FAT	GO:0046906~tetrapyrrole binding	7	2.48227	0.0787463	A1KZ92, Q95078, O60494, O70244, P10610, Q6VVW9, Q0IIF9	201	161	10797	2.3355	1	0.847004	68.3027
GOTERM_BP_FAT	GO:0015672~monovalent inorganic cation transport	10	3.5461	0.0810279	Q9MYS6, O70247, Q96T55, Q5BL81, Q03720, Q1EHB4, Q7T384, Q21974, Q13733, Q92911	199	290	10936	1.89499	1	0.973798	74.811
GOTERM_MF_FAT	GO:0004672~protein kinase activity	20	7.0922	0.0823944	O14772, Q3SZW1, P13406, Q23023, P00516, P80192, P00528, P16065, Q3MHH5, Q14012, Q9SF85, Q02779, P42689, Q13627, P42346, Q95UN8, Q3UHL1, P35991, P51841	201	729	10797	1.4737	1	0.845038	70.0164
GOTERM_BP_FAT	GO:0016331~morphogenesis of embryonic epithelium	5	1.77305	0.0829101	P49815, Q24372, Q95UN8, Q804S5, P00528	199	91	10936	3.01949	1	0.972947	75.6397
GOTERM_MF_FAT	GO:0046873~metal ion transmembrane transporter activity	10	3.5461	0.0848203	Q6PEH9, Q9MYS6, P20107, Q9VSL7, Q60738, Q78IQ7, Q96T55, Q64542, Q03720, Q21974	201	286	10797	1.8782	1	0.838924	71.1079
GOTERM_BP_FAT	GO:0043506~regulation of JUN kinase activity	3	1.06383	0.085222	Q02779, Q95UN8, P80192	199	27	10936	6.10609	1	0.972653	76.6227
GOTERM_BP_FAT	GO:0006790~sulfur metabolic process	5	1.77305	0.0855143	Q76KB1, Q58DW2, P20107, Q5IGR6, P07314	199	92	10936	2.98667	1	0.969881	76.7442
GOTERM_BP_FAT	GO:0046394~carboxylic acid biosynthetic process	7	2.48227	0.0865355	O73888, Q58DW2, O16025, Q9JLJ4, Q920L7, P31326, P10658	199	169	10936	2.27623	1	0.968002	77.1644
GOTERM_BP_FAT	GO:0016053~organic acid biosynthetic process	7	2.48227	0.0865355	O73888, Q58DW2, O16025, Q9JLJ4, Q920L7, P31326, P10658	199	169	10936	2.27623	1	0.968002	77.1644
GOTERM_CC_FAT	GO:0016023~cytoplasmic membrane-bounded vesicle	13	4.60993	0.0868104	P98164, Q9WVE8, P39052, A7E3W5, Q804S5, Q9NQE7, Q8R420, A2ARV4, O60494, Q78IQ7, O70244, P10079, Q9NQ86	181	409	9523	1.6723	1	0.823245	68.7589
GOTERM_BP_FAT	GO:0007185~transmembrane receptor protein tyrosine phosphatase signaling pathway	2	0.70922	0.0873229	B3DK56, B2GV87	199	5	10936	21.9819	1	0.965802	77.4834
GOTERM_CC_FAT	GO:0045177~apical part of cell	6	2.12766	0.0880023	A2ARV4, P98164, O60494, O70244, Q78IQ7, Q01484	181	125	9523	2.52544	1	0.802633	69.2773
GOTERM_BP_FAT	GO:0044272~sulfur compound biosynthetic process	4	1.41844	0.0946597	Q76KB1, Q58DW2, Q5IGR6, P07314	199	60	10936	3.66365	1	0.971892	80.2618
GOTERM_BP_FAT	GO:0044271~nitrogen compound biosynthetic process	12	4.25532	0.0970629	P16065, Q58DW2, Q9SF85, Q9CXF0, P05089, Q64542, Q2VQV9, P31326, P51841, Q13733, P10658	199	390	10936	1.69092	1	0.97179	81.0996

## Sheet: NP vs control
Category	Term	Count	%	PValue	Genes	List Total	Pop Hits	Pop Total	Fold Enrichment	Bonferroni	Benjamini	FDR
GOTERM_BP_FAT	GO:0006829~zinc ion transport	7	2.00573	9.79e-06	Q6PEH9, A4IIC5, P20107, Q9VSL7, Q60738, Q78IQ7, Q504Y0	251	23	10936	13.2603	0.0137732	0.0137732	0.0161491
GOTERM_CC_FAT	GO:0005576~extracellular region	47	13.467	4.14e-05	Q8N2E2, P08934, P0C6B8, P19218, O00468, Q2PC93, Q868Z9, Q6YHK3, Q60847, O02350, Q4LDE5, Q09024, Q3LX99, P35003, Q9H4G4, Q6DFV8, P10079, P06280, P25774, Q7RTY7, A1KZ92, Q95M17, P42788, Q680I5, O62650, A6QLZ7, P38977, Q18823, P24787, Q5RC26, P23142, Q99PW6, P31696, Q9Y264, O08523, P07911, A2AX52, Q9D733, P04813, O75095, O88281, Q9WVH9, Q80V70, Q75N90, Q6RY07, P98060, Q6NUI6	240	1011	9523	1.84463	0.0113175	0.0113175	0.0545592
GOTERM_MF_FAT	GO:0046906~tetrapyrrole binding	14	4.01146	0.000121	A1KZ92, Q4V8D1, Q5XIU9, P70085, Q62737, Q5RCN6, Q4PJW3, Q09128, O18992, O61309, O88833, Q6VVW9, Q9V5L3, Q9JLB4	258	161	10797	3.63903	0.0501588	0.0501588	0.170232
GOTERM_MF_FAT	GO:0005385~zinc ion transmembrane transporter activity	5	1.43266	0.000189	Q6PEH9, P20107, Q9VSL7, Q60738, Q78IQ7	258	13	10797	16.0957	0.0773005	0.0394275	0.266008
GOTERM_MF_FAT	GO:0020037~heme binding	13	3.72493	0.000272	A1KZ92, Q4V8D1, Q5XIU9, P70085, Q62737, Q5RCN6, Q4PJW3, Q09128, O18992, O61309, O88833, Q6VVW9, Q9V5L3	258	152	10797	3.57918	0.109119	0.0377827	0.38182
GOTERM_BP_FAT	GO:0000041~transition metal ion transport	8	2.29226	0.000299	Q6PEH9, A4IIC5, P20107, Q9VSL7, Q60738, Q78IQ7, Q69P80, Q504Y0	251	57	10936	6.11505	0.345553	0.191021	0.49249
GOTERM_MF_FAT	GO:0004706~JUN kinase kinase kinase activity	4	1.14613	0.000435	Q02779, Q95UN8, Q16584, P80192	258	7	10797	23.9136	0.168692	0.0451383	0.609827
GOTERM_MF_FAT	GO:0004709~MAP kinase kinase kinase activity	6	1.7192	0.000546	Q3U1V8, Q02779, Q12852, Q95UN8, Q16584, P80192	258	29	10797	8.65838	0.207312	0.0454022	0.766243
GOTERM_MF_FAT	GO:0046915~transition metal ion transmembrane transporter activity	6	1.7192	0.000874	Q6PEH9, P20107, Q9VSL7, Q60738, Q78IQ7, Q69P80	258	32	10797	7.84666	0.310477	0.0600788	1.22328
GOTERM_MF_FAT	GO:0005509~calcium ion binding	38	10.8883	0.00110328	Q32LQ0, P14533, P0C6B8, P04572, Q9Z0M6, Q2PC93, Q25088, Q4LDE5, Q9Y4C0, Q9R0N7, Q03720, P10079, Q5R8Z6, P49619, O35245, Q7RTY7, A1KZ92, Q95334, A5WW21, P23377, Q9NZM6, Q5RC26, Q5ZQU0, P23142, Q99PW6, P05434, P11121, P07911, Q61830, Q8TER0, Q9VT65, O88281, O75095, Q9WVH9, Q9JLB4, Q80V70, P27216, Q75N90	258	922	10797	1.72479	0.374468	0.0648252	1.54129
GOTERM_MF_FAT	GO:0043167~ion binding	121	34.6705	0.00144643	Q9NX46, Q23985, Q5XIU9, Q9P243, Q9WVF7, P0C6B8, Q9Z0M6, O94264, Q25088, Q9C040, Q9VSL7, P30714, Q9R0N7, P10076, P50876, P10079, P41962, P49619, Q9VAC5, Q6PAW2, P42788, P20107, Q5SVZ6, Q95334, Q62737, Q5ZQU0, C3XR70, P11121, Q09128, A4IIC5, Q60738, P29054, Q99MV7, P39688, Q32LQ0, P04572, Q12852, Q868Z9, Q804S5, O76083, Q0P5B3, Q5R5Y7, Q4LDE5, O02350, Q9P792, Q1EHB4, Q5R8Z6, Q7RTY7, Q95M17, A5WW21,…	258	4050	10797	1.2503	0.459454	0.0740148	2.01615
GOTERM_BP_FAT	GO:0046777~protein amino acid autophosphorylation	8	2.29226	0.00158582	P43404, Q02779, Q12852, Q13627, Q95UN8, Q16584, P80192, P39688	251	75	10936	4.64744	0.894484	0.527459	2.58484
GOTERM_MF_FAT	GO:0043169~cation binding	119	34.0974	0.00196017	Q9NX46, Q23985, Q5XIU9, Q9P243, Q9WVF7, P0C6B8, Q9Z0M6, O94264, Q25088, Q9C040, Q9VSL7, P30714, Q9R0N7, P10076, P50876, P10079, P41962, P49619, Q9VAC5, Q6PAW2, P42788, P20107, Q5SVZ6, Q95334, Q62737, Q5ZQU0, C3XR70, P11121, Q09128, A4IIC5, Q60738, P29054, Q99MV7, P39688, Q32LQ0, P04572, Q12852, Q868Z9, Q804S5, O76083, Q0P5B3, Q5R5Y7, Q4LDE5, O02350, Q9P792, Q1EHB4, Q5R8Z6, Q7RTY7, Q95M17, A5WW21,…	258	3999	10797	1.24531	0.565644	0.0884916	2.72311
GOTERM_BP_FAT	GO:0007009~plasma membrane organization	4	1.14613	0.00530247	P35580, Q9R0N7, O00468, P31696	251	16	10936	10.8924	0.999465	0.847927	8.39905
GOTERM_MF_FAT	GO:0015082~di-, tri-valent inorganic cation transmembrane transporter activity	6	1.7192	0.00650239	Q6PEH9, P20107, Q9VSL7, Q60738, Q78IQ7, Q69P80	258	50	10797	5.02186	0.937497	0.242138	8.77073
GOTERM_MF_FAT	GO:0004713~protein tyrosine kinase activity	13	3.72493	0.00660774	Q3U1V8, Q25410, P16066, P43404, P13406, Q23023, Q13627, Q95UN8, P51841, A2AAJ9, P39688, Q91147	258	221	10797	2.4617	0.940251	0.225971	8.90675
GOTERM_MF_FAT	GO:0046872~metal ion binding	114	32.6648	0.00714491	Q9NX46, Q23985, Q5XIU9, Q9P243, Q9WVF7, P0C6B8, Q9Z0M6, O94264, Q25088, Q9C040, Q9VSL7, P30714, Q9R0N7, P10076, P50876, P10079, P41962, P49619, Q9VAC5, Q6PAW2, P42788, P20107, Q5SVZ6, Q95334, Q62737, Q5ZQU0, C3XR70, P11121, Q09128, A4IIC5, Q60738, P29054, Q99MV7, P39688, Q32LQ0, Q12852, P04572, Q868Z9, Q804S5, O76083, Q0P5B3, Q5R5Y7, Q4LDE5, O02350, Q9P792, Q1EHB4, Q5R8Z6, Q7RTY7, A5WW21, P04050,…	258	3934	10797	1.2127	0.952522	0.224275	9.59743
GOTERM_BP_FAT	GO:0010627~regulation of protein kinase cascade	9	2.5788	0.00865243	Q02779, P08934, O43734, P49815, Q645M6, Q95UN8, Q16584, P39429, P80192	251	127	10936	3.08762	0.999996	0.914801	13.3588
GOTERM_CC_FAT	GO:0005886~plasma membrane	73	20.9169	0.00901238	Q80SY4, Q96RY7, Q9WV92, P19218, Q9Z0M6, P49815, Q01484, B3MFV7, Q99K28, O42414, Q9VSL7, Q9R0N7, Q9HBG4, Q8TDY8, O35245, Q5R7Y0, Q9H4G0, Q86WB7, Q62737, Q0WYX8, P30430, P28572, Q645M6, P35580, O02365, Q60738, Q8R4D5, A7Y2W8, Q21974, P39688, O35136, Q5RBE1, Q32LQ0, P42519, P35992, Q90610, Q12852, P16157, Q804S5, Q6YHK3, Q91X85, Q03412, Q8R420, P16066, P30875, Q3TZZ7, P43404, Q9Y4C0, Q03720, Q1EHB4,…	240	2226	9523	1.30125	0.91706	0.712007	11.2523
GOTERM_BP_FAT	GO:0007257~activation of JUN kinase activity	4	1.14613	0.0100923	Q02779, Q95UN8, Q16584, P80192	251	20	10936	8.71394	0.999999	0.908879	15.412
GOTERM_BP_FAT	GO:0006882~cellular zinc ion homeostasis	3	0.859599	0.0101326	P20107, Q60738, Q78IQ7	251	7	10936	18.6727	0.999999	0.872748	15.4688
GOTERM_CC_FAT	GO:0005903~brush border	5	1.43266	0.0110021	Q32LQ0, Q9HBG4, Q9WTW7, Q9JLB4, Q91VE0	240	35	9523	5.66845	0.952277	0.637277	13.5733
GOTERM_BP_FAT	GO:0055069~zinc ion homeostasis	3	0.859599	0.0133077	P20107, Q60738, Q78IQ7	251	8	10936	16.3386	1	0.906795	19.8335
GOTERM_BP_FAT	GO:0007254~JNK cascade	5	1.43266	0.0139161	Q02779, Q12852, Q95UN8, Q16584, P80192	251	41	10936	5.31338	1	0.889903	20.6452
GOTERM_BP_FAT	GO:0031098~stress-activated protein kinase signaling pathway	5	1.43266	0.0151117	Q02779, Q12852, Q95UN8, Q16584, P80192	251	42	10936	5.18687	1	0.884406	22.218
GOTERM_BP_FAT	GO:0043507~positive regulation of JUN kinase activity	4	1.14613	0.0167582	Q02779, Q95UN8, Q16584, P80192	251	24	10936	7.26162	1	0.886625	24.3361
GOTERM_BP_FAT	GO:0007155~cell adhesion	21	6.01719	0.0168158	A4IFW2, Q68VK5, O35136, P0C6B8, Q90610, Q18823, Q9Z0M6, Q5RC26, Q2PC93, Q5ZQU0, Q7Z5N4, O08523, Q60847, A2AX52, Q8TER0, O42414, Q4LDE5, Q9Y4C0, Q09024, Q24372, Q9WVH9	251	523	10936	1.74945	1	0.865009	24.4092
GOTERM_BP_FAT	GO:0022610~biological adhesion	21	6.01719	0.0172693	A4IFW2, Q68VK5, O35136, P0C6B8, Q90610, Q18823, Q9Z0M6, Q5RC26, Q2PC93, Q5ZQU0, Q7Z5N4, O08523, Q60847, A2AX52, Q8TER0, O42414, Q4LDE5, Q9Y4C0, Q09024, Q24372, Q9WVH9	251	525	10936	1.74279	1	0.850252	24.9825
GOTERM_MF_FAT	GO:0009055~electron carrier activity	13	3.72493	0.0184616	Q4V8D1, Q2KHZ9, P70085, Q5RD31, Q5RCN6, Q4PJW3, Q09128, O18992, O61309, O88833, Q9D733, Q6VVW9, Q9V5L3	258	254	10797	2.14187	0.999636	0.456211	23.0645
GOTERM_MF_FAT	GO:0042803~protein homodimerization activity	11	3.15186	0.0194613	Q02779, Q8R4D5, Q12852, P49815, Q99MV7, Q95UN8, Q804S5, P49454, Q16584, P06280, P80192	258	197	10797	2.33674	0.999764	0.449328	24.1598
GOTERM_BP_FAT	GO:0043408~regulation of MAPKKK cascade	6	1.7192	0.0205856	Q02779, P08934, Q95UN8, Q16584, P39429, P80192	251	69	10936	3.78867	1	0.878192	29.0523
GOTERM_BP_FAT	GO:0030001~metal ion transport	17	4.87106	0.0218315	P20107, Q9WTW7, Q6PEH9, A4IIC5, Q9VSL7, P30714, Q78IQ7, Q60738, Q8R4D5, Q03720, Q03567, Q69P80, Q1EHB4, Q21974, Q504Y0, O35245, Q92911	251	401	10936	1.8471	1	0.875717	30.527
GOTERM_MF_FAT	GO:0004175~endopeptidase activity	17	4.87106	0.0222417	Q6PAW2, P05689, P23377, P30430, Q868Z9, Q99PW6, Q3ZCJ8, Q5F383, Q9VT65, P35003, P83298, P04813, P98060, P25774, Q9P0U3, Q7RTY7, Q9VAC5	258	386	10797	1.84308	0.999929	0.471279	27.1303
GOTERM_BP_FAT	GO:0043506~regulation of JUN kinase activity	4	1.14613	0.0230374	Q02779, Q95UN8, Q16584, P80192	251	27	10936	6.45477	1	0.87307	31.9268
GOTERM_CC_FAT	GO:0031430~M band	3	0.859599	0.0247153	P16157, Q8C8R3, Q01484	240	10	9523	11.9038	0.998974	0.821028	28.1062
GOTERM_BP_FAT	GO:0006955~immune response	11	3.15186	0.0259681	Q61107, Q5RBE1, Q62737, P32456, P54276, Q96PP9, O43734, Q6R5N8, Q8N1K5, Q6RY07, P25774	251	215	10936	2.22915	1	0.888432	35.2192
GOTERM_CC_FAT	GO:0016324~apical plasma membrane	7	2.00573	0.0279314	P07911, Q32LQ0, Q78IQ7, Q9HBG4, Q9JLB4, Q8C8R3, Q01484	240	92	9523	3.01907	0.999586	0.789462	31.1702
GOTERM_MF_FAT	GO:0046983~protein dimerization activity	15	4.29799	0.0313133	Q5SVZ6, Q62737, Q12852, P49815, Q9WU78, Q804S5, Q16584, P49454, P80192, Q02779, Q80WQ9, Q8R4D5, Q99MV7, Q95UN8, P06280	258	337	10797	1.86271	0.999999	0.570468	36.0876
GOTERM_BP_FAT	GO:0006812~cation transport	19	5.44413	0.0325099	P20107, Q9WTW7, Q6PEH9, A4IIC5, Q9VSL7, Q9VCA2, P30714, Q78IQ7, Q60738, Q8R4D5, Q9HBG4, Q03720, Q03567, Q69P80, Q1EHB4, Q21974, Q504Y0, O35245, Q92911	251	491	10936	1.686	1	0.925858	42.0365
GOTERM_BP_FAT	GO:0046328~regulation of JNK cascade	5	1.43266	0.0325874	Q02779, Q95UN8, Q16584, P39429, P80192	251	53	10936	4.11035	1	0.915484	42.1131
GOTERM_BP_FAT	GO:0043062~extracellular structure organization	9	2.5788	0.033549	O42414, Q9Y4C0, A6QLZ7, Q9W596, O00468, Q5RC26, Q868Z9, P31696, Q9WVH9	251	163	10936	2.40569	1	0.910876	43.0553
GOTERM_BP_FAT	GO:0070302~regulation of stress-activated protein kinase signaling pathway	5	1.43266	0.0345847	Q02779, Q95UN8, Q16584, P39429, P80192	251	54	10936	4.03423	1	0.906981	44.0539
GOTERM_BP_FAT	GO:0033692~cellular polysaccharide biosynthetic process	4	1.14613	0.0359572	Q76KB1, Q9V730, Q04446, Q8IYK4	251	32	10936	5.44622	1	0.905451	45.352
GOTERM_CC_FAT	GO:0044421~extracellular region part	21	6.01719	0.0381044	A6QLZ7, P08934, Q18823, O00468, Q868Z9, Q2PC93, P23142, Q99PW6, Q6YHK3, P31696, Q9Y264, O08523, Q60847, A2AX52, O02350, Q09024, P35003, P04813, P10079, Q75N90, Q6NUI6	240	521	9523	1.59935	0.999977	0.831463	40.0855
GOTERM_BP_FAT	GO:0043405~regulation of MAP kinase activity	6	1.7192	0.0412693	Q02779, P08934, P49815, Q95UN8, Q16584, P80192	251	83	10936	3.14962	1	0.925466	50.1142
GOTERM_MF_FAT	GO:0030545~receptor regulator activity	3	0.859599	0.0425422	O00468, P31696, Q9Y264	258	14	10797	8.96761	1	0.66272	45.7583
GOTERM_BP_FAT	GO:0009967~positive regulation of signal transduction	9	2.5788	0.0438451	Q23985, P43404, Q5RJ80, P08934, P23377, O43734, Q645M6, Q95UN8, Q804S5	251	172	10936	2.27981	1	0.929147	52.2803
GOTERM_BP_FAT	GO:0006898~receptor-mediated endocytosis	4	1.14613	0.0451565	P39052, Q3SYV4, P21575, Q9JLB4	251	35	10936	4.9794	1	0.927129	53.3488
GOTERM_CC_FAT	GO:0031224~intrinsic to membrane	106	30.3725	0.0463635	Q96RY7, Q6UXB4, Q5XIU9, Q9NUR3, P19218, Q9Z0M6, Q7TNT2, Q9VSL7, P30714, Q9VCA2, Q9R0N7, Q9HBG4, P50876, Q69P80, Q6R5N8, Q9VAC5, Q6DDL7, Q76KB1, Q6DFT6, P20107, Q86WB7, Q95334, Q9W735, Q62737, P30430, P28572, Q91147, A4IIC5, Q60738, Q64487, A7Y2W8, Q09225, A4IFW2, O35136, Q32LQ0, P35992, Q90610, Q6P1C6, Q91X85, Q8R420, P30875, Q96F81, Q1EHB4, Q24372, P23377, Q9NZM6, Q99PW6, Q9VUL9, O08523, P33527,…	240	3664	9523	1.14792	0.999998	0.845104	46.525
GOTERM_MF_FAT	GO:0046870~cadmium ion binding	2	0.573066	0.0470414	P20107, P81695	258	2	10797	41.8488	1	0.679436	49.2368
GOTERM_BP_FAT	GO:0015012~heparan sulfate proteoglycan biosynthetic process	3	0.859599	0.050599	Q76KB1, Q5IGR6, Q9V730	251	16	10936	8.16932	1	0.940979	57.548
GOTERM_BP_FAT	GO:0030201~heparan sulfate proteoglycan metabolic process	3	0.859599	0.050599	Q76KB1, Q5IGR6, Q9V730	251	16	10936	8.16932	1	0.940979	57.548
GOTERM_MF_FAT	GO:0070011~peptidase activity, acting on L-amino acid peptides	22	6.30372	0.0531428	Q6PAW2, P10619, P42788, Q95334, Q32LQ0, P05689, P23377, P30430, Q868Z9, Q99PW6, Q3ZCJ8, Q5F383, O02350, Q9VT65, P35003, P83298, P04813, P98060, P25774, Q9P0U3, Q7RTY7, Q9VAC5	258	605	10797	1.52178	1	0.705204	53.6235
GOTERM_MF_FAT	GO:0004715~non-membrane spanning protein tyrosine kinase activity	5	1.43266	0.0542372	P43404, P13406, Q13627, P39688	258	60	10797	3.4874	1	0.694246	54.3722
GOTERM_BP_FAT	GO:0060627~regulation of vesicle-mediated transport	5	1.43266	0.058394	Q80SY4, Q9WVE8, P49815, Q804S5, Q96E17	251	64	10936	3.40388	1	0.957478	62.9475
GOTERM_BP_FAT	GO:0006790~sulfur metabolic process	6	1.7192	0.0594613	Q76KB1, P20107, Q5IGR6, Q9V730, Q680I5, C3XR70	251	92	10936	2.8415	1	0.955056	63.6345
GOTERM_CC_FAT	GO:0031672~A band	3	0.859599	0.0597425	P16157, Q8C8R3, Q01484	240	16	9523	7.43984	1	0.879674	55.6143
GOTERM_CC_FAT	GO:0005874~microtubule	13	3.72493	0.059962	Q9QUS6, Q8BW94, P97329, P39052, Q9W596, Q63164, P21575, Q6PCJ1, Q6ED65, Q96JB1, Q16584, P82457	240	289	9523	1.78488	1	0.848838	55.7507
GOTERM_MF_FAT	GO:0022890~inorganic cation transmembrane transporter activity	8	2.29226	0.0615861	Q6PEH9, P20107, Q9VSL7, P30714, Q60738, Q78IQ7, Q69P80, Q9HBG4	258	147	10797	2.27749	1	0.723742	59.1154
GOTERM_BP_FAT	GO:0030100~regulation of endocytosis	4	1.14613	0.0627955	Q80SY4, Q9WVE8, P49815, Q804S5	251	40	10936	4.35697	1	0.95795	65.7042
GOTERM_BP_FAT	GO:0050808~synapse organization	5	1.43266	0.0639861	O42414, Q9Y4C0, Q9W596, O00468, P31696	251	66	10936	3.30074	1	0.955988	66.4162
GOTERM_MF_FAT	GO:0030414~peptidase inhibitor activity	6	1.7192	0.0657366	P38977, P08934, P23377, Q868Z9, Q2PC93, Q6YHK3	258	91	10797	2.75926	1	0.731143	61.5875
GOTERM_BP_FAT	GO:0055114~oxidation reduction	24	6.87679	0.0670613	A1KZ92, Q2KHZ9, Q4V8D1, P70085, Q62737, Q7SY23, Q6RVV4, Q8JIS3, Q7TNT2, Q5RD31, Q6AY30, Q5RCN6, Q09128, Q4PJW3, P55006, O18992, O61309, P48631, Q27888, O88833, Q6VVW9, P29375, Q9V5L3, P41962	251	723	10936	1.4463	1	0.958121	68.1912
GOTERM_BP_FAT	GO:0010647~positive regulation of cell communication	9	2.5788	0.0703114	Q23985, P43404, Q5RJ80, P08934, P23377, O43734, Q645M6, Q95UN8, Q804S5	251	190	10936	2.06383	1	0.960377	69.9711
GOTERM_BP_FAT	GO:0048638~regulation of developmental growth	4	1.14613	0.0706192	Q9W596, O00468, Q23023, P31696	251	42	10936	4.1495	1	0.956922	70.1348
GOTERM_MF_FAT	GO:0008233~peptidase activity	22	6.30372	0.0712161	Q6PAW2, P10619, P42788, Q95334, Q32LQ0, P05689, P23377, P30430, Q868Z9, Q99PW6, Q3ZCJ8, Q5F383, O02350, Q9VT65, P35003, P83298, P04813, P98060, P25774, Q9P0U3, Q7RTY7, Q9VAC5	258	627	10797	1.46838	1	0.74466	64.639
GOTERM_CC_FAT	GO:0031012~extracellular matrix	13	3.72493	0.0723159	A6QLZ7, Q18823, O00468, Q868Z9, P23142, P31696, Q99PW6, Q60847, O08523, A2AX52, P10079, Q75N90, Q6NUI6	240	298	9523	1.73097	1	0.873088	62.8336
GOTERM_CC_FAT	GO:0042599~lamellar body	2	0.573066	0.0734251	Q8R420, Q99758	240	3	9523	26.4528	1	0.851402	63.4153
GOTERM_CC_FAT	GO:0031225~anchored to membrane	9	2.5788	0.0735306	P07911, O35136, Q9D733, Q0WYX8, P19218, Q9H4G4, Q24372, Q6YHK3, O08523	240	175	9523	2.04064	1	0.826268	63.4702
GOTERM_BP_FAT	GO:0008582~regulation of synaptic growth at neuromuscular junction	3	0.859599	0.0755143	Q9W596, O00468, P31696	251	20	10936	6.53546	1	0.962082	72.6271
GOTERM_MF_FAT	GO:0046873~metal ion transmembrane transporter activity	12	3.4384	0.0804445	Q6PEH9, A4IIC5, P20107, Q9VSL7, Q60738, Q78IQ7, Q8R4D5, Q69P80, Q03720, Q21974, Q504Y0, O35245	258	286	10797	1.7559	1	0.773522	69.2742
GOTERM_MF_FAT	GO:0005506~iron ion binding	14	4.01146	0.080904	A1KZ92, Q4V8D1, Q5XIU9, P70085, Q62737, Q5RCN6, Q4PJW3, Q09128, O18992, O61309, O88833, Q6VVW9, P29375, Q9V5L3	258	355	10797	1.65038	1	0.761694	69.4896
GOTERM_BP_FAT	GO:0010171~body morphogenesis	4	1.14613	0.0831281	O02365, Q18823, Q23023, Q09225	251	45	10936	3.87286	1	0.970212	76.1188
GOTERM_MF_FAT	GO:0015370~solute:sodium symporter activity	4	1.14613	0.0865973	A7Y2W8, P28572, Q9WTW7, Q92911	258	44	10797	3.80444	1	0.772501	72.0439
GOTERM_BP_FAT	GO:0000271~polysaccharide biosynthetic process	4	1.14613	0.0874953	Q76KB1, Q9V730, Q04446, Q8IYK4	251	46	10936	3.78867	1	0.972785	77.928
GOTERM_MF_FAT	GO:0003682~chromatin binding	7	2.00573	0.0875118	Q99741, Q4LDE5, P0C6B8, P54276, P34618, P49454, O89033	258	129	10797	2.27087	1	0.763437	72.4352
GOTERM_BP_FAT	GO:0006182~cGMP biosynthetic process	3	0.859599	0.0891504	P16065, P16066, P51841	251	22	10936	5.94133	1	0.972016	78.5794
GOTERM_CC_FAT	GO:0030017~sarcomere	5	1.43266	0.0909858	Q14315, P16157, Q8C8R3, A2AAJ9, Q01484	240	68	9523	2.91759	1	0.867074	71.5731
GOTERM_MF_FAT	GO:0042802~identical protein binding	14	4.01146	0.0916289	P17136, Q12852, P49815, Q645M6, Q804S5, Q16584, P49454, P80192, Q02779, Q8R4D5, P21575, Q99MV7, Q95UN8, P06280	258	362	10797	1.61846	1	0.76746	74.1345
GOTERM_MF_FAT	GO:0046914~transition metal ion binding	72	20.6304	0.0918564	Q80SY4, Q23985, Q5XIU9, Q9P243, Q9WVF7, Q99L45, O94264, Q99K28, Q9C040, Q9VSL7, P10076, P50876, Q9H8W5, Q9R1R2, P41962, P49619, Q9VAC5, A1KZ92, Q6PAW2, Q5SVZ6, P42788, P20107, Q95334, Q4V8D1, Q62737, P70085, P05089, P13406, P52738, Q6PEH9, Q09128, Q4PJW3, A4IIC5, O88833, Q60738, P29054, Q6VVW9, Q9V5L3, Q99MV7, P82457, P39688, Q96T88, Q32LQ0, Q13489, Q868Z9, O08954, Q804S5, O76083, Q96N22, Q9QUS6,…	258	2582	10797	1.16697	1	0.756361	74.2256
GOTERM_BP_FAT	GO:0016202~regulation of striated muscle tissue development	4	1.14613	0.0919574	Q9W596, O00468, P31696, P49454	251	47	10936	3.70806	1	0.972597	79.643
GOTERM_CC_FAT	GO:0045177~apical part of cell	7	2.00573	0.0943975	P07911, Q32LQ0, Q78IQ7, Q9HBG4, Q9JLB4, Q8C8R3, Q01484	240	125	9523	2.22203	1	0.857396	72.9482
GOTERM_MF_FAT	GO:0004383~guanylate cyclase activity	3	0.859599	0.0954877	P16065, P16066, P51841	258	22	10797	5.70666	1	0.758711	75.6384
GOTERM_BP_FAT	GO:0051053~negative regulation of DNA metabolic process	3	0.859599	0.0962209	Q99741, Q13535, P54276	251	23	10936	5.68301	1	0.974672	81.1641
