# Supplementary material for: Toxicogenomics in a soil sentinel exposure to Zn nanoparticles and ions reveals the comparative role of toxicokinetic and toxicodynamic mechanisms
Source: Royal Society of Chemistry journal article supplement (doi:10.1039/c9en01124b), 2020-01-01
Supplement: c9en01124b9.pdf [file c9en01124b9.pdf]

## NPs *versus* ions

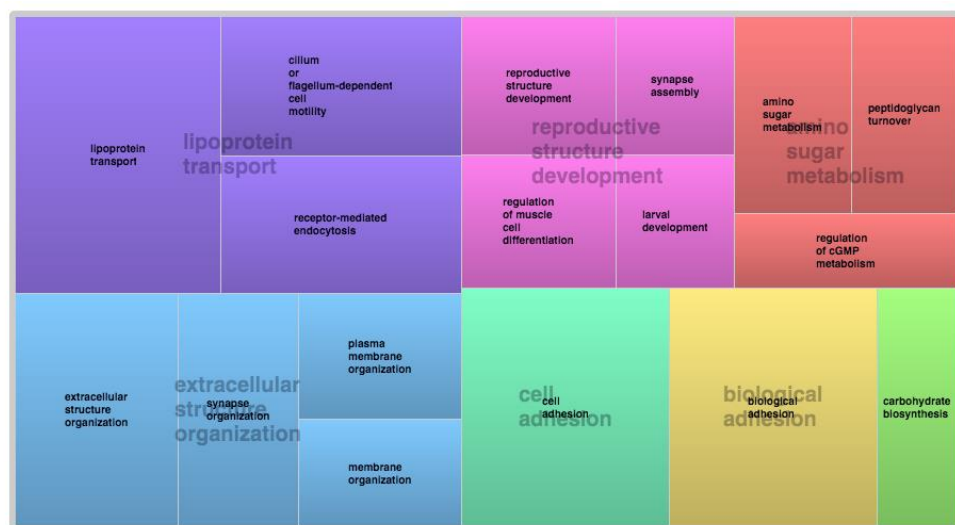

**BIOLOGICAL PROCESS**

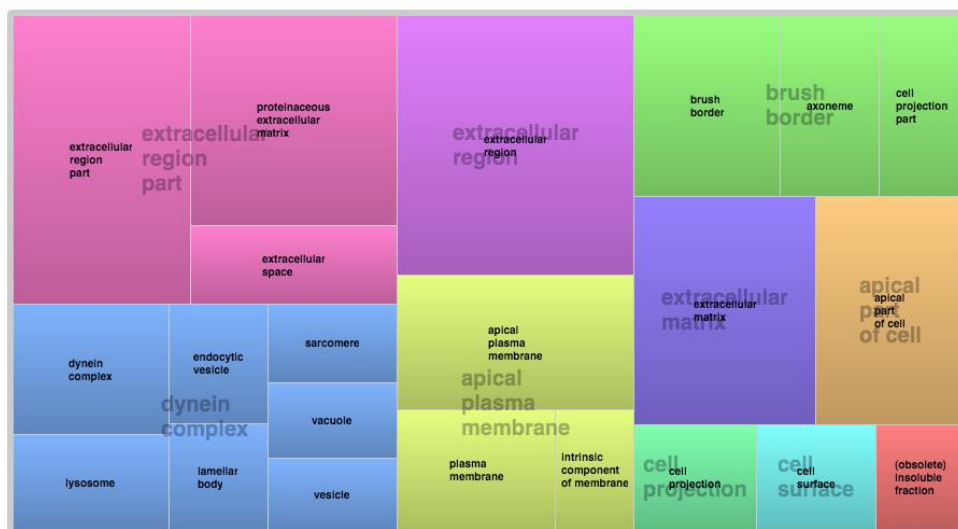

**CELLULAR COMPONENT**

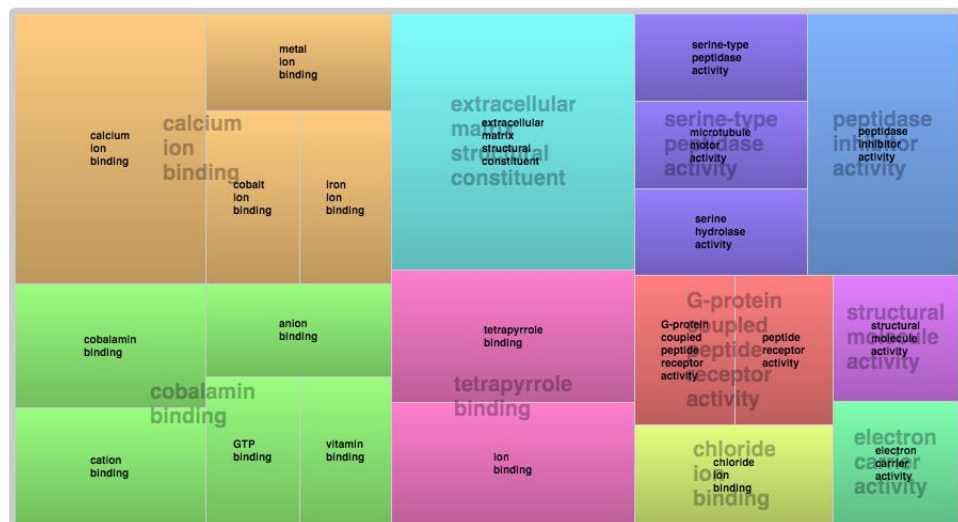

**MOLECULAR FUNCTION**

Ions *versus* control

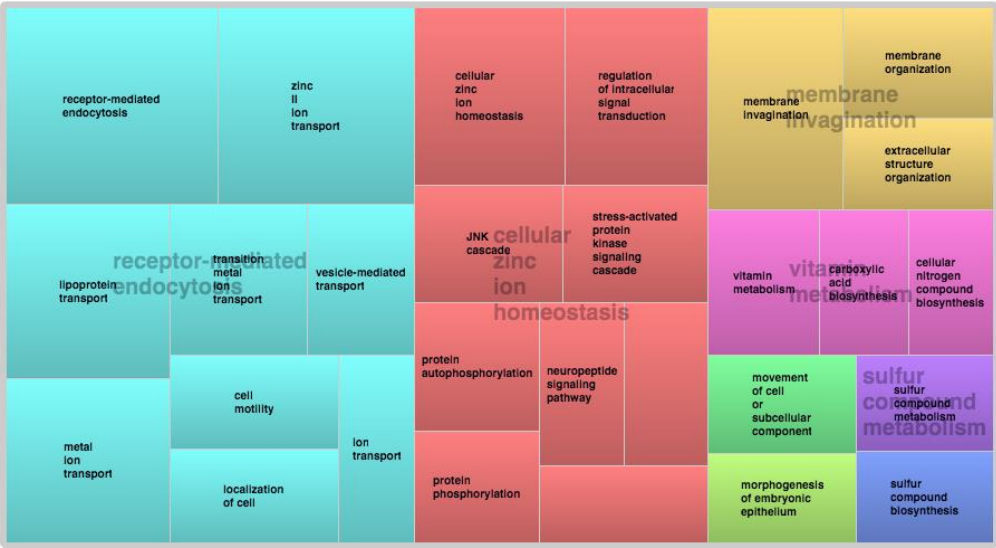

BIOLOGICAL PROCESS

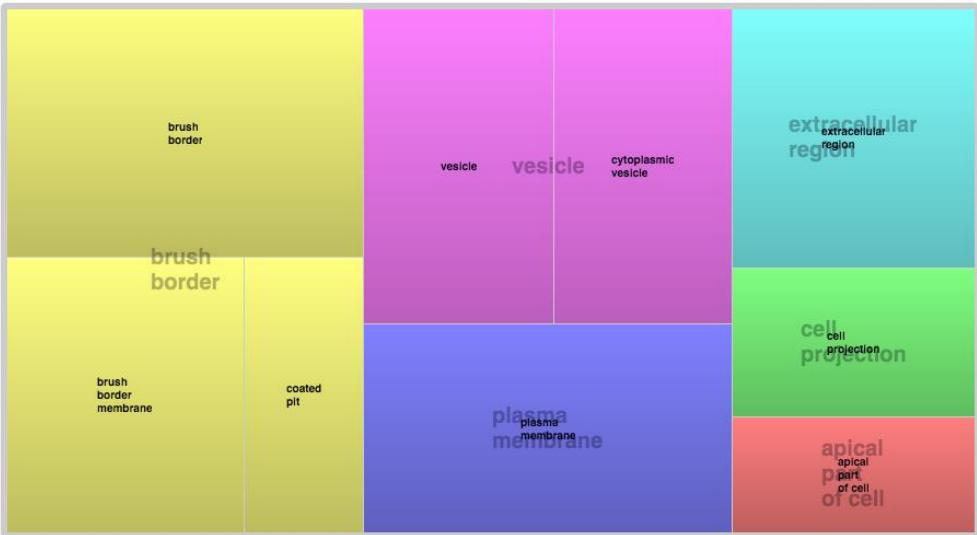

CELLULAR COMPONENT

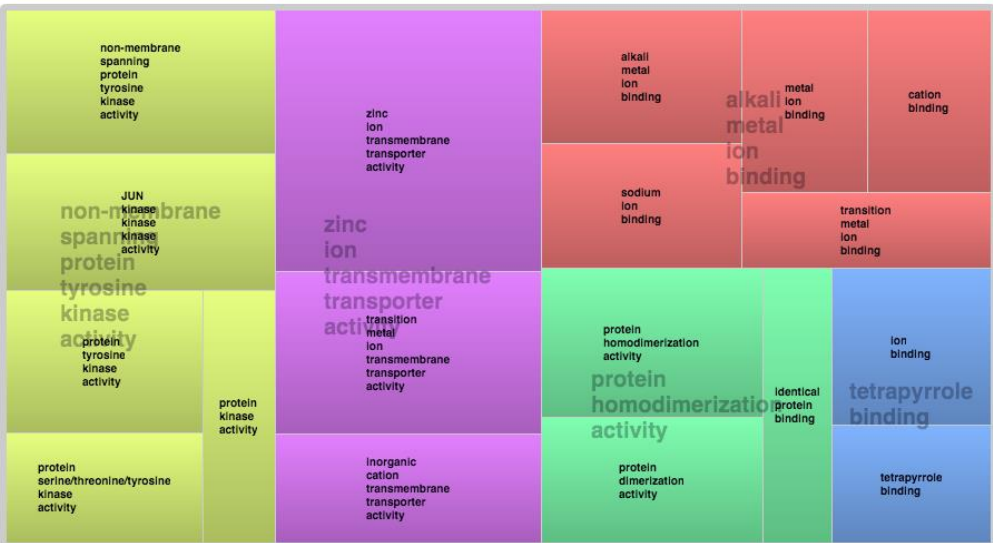

MOLECULAR FUNCTION

NPs *versus* control

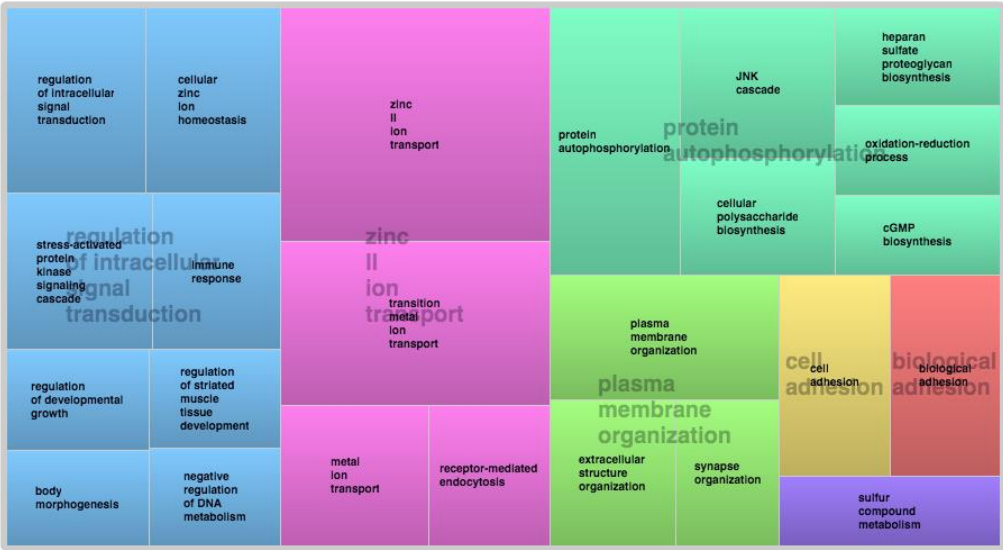

BIOLOGICAL PROCESS

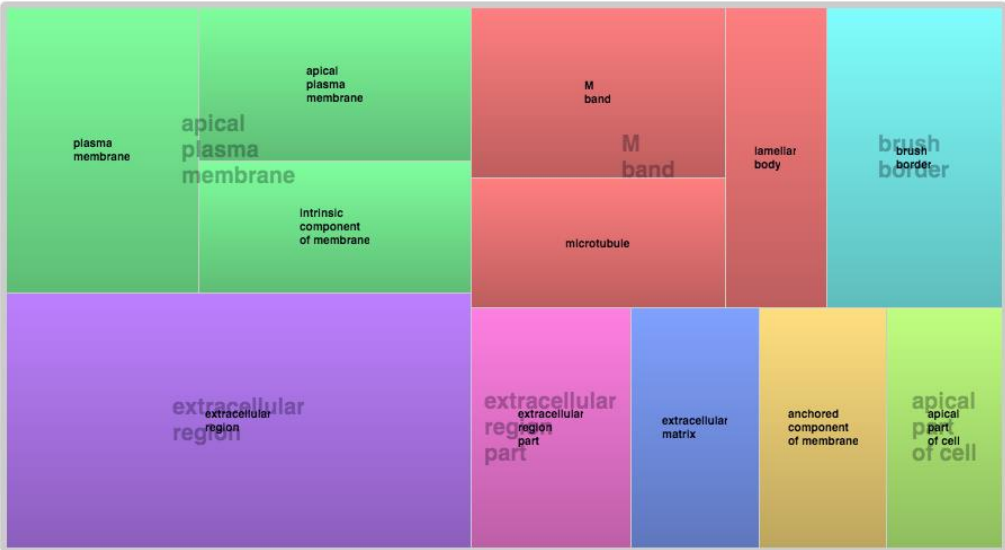

CELLULAR COMPONENT

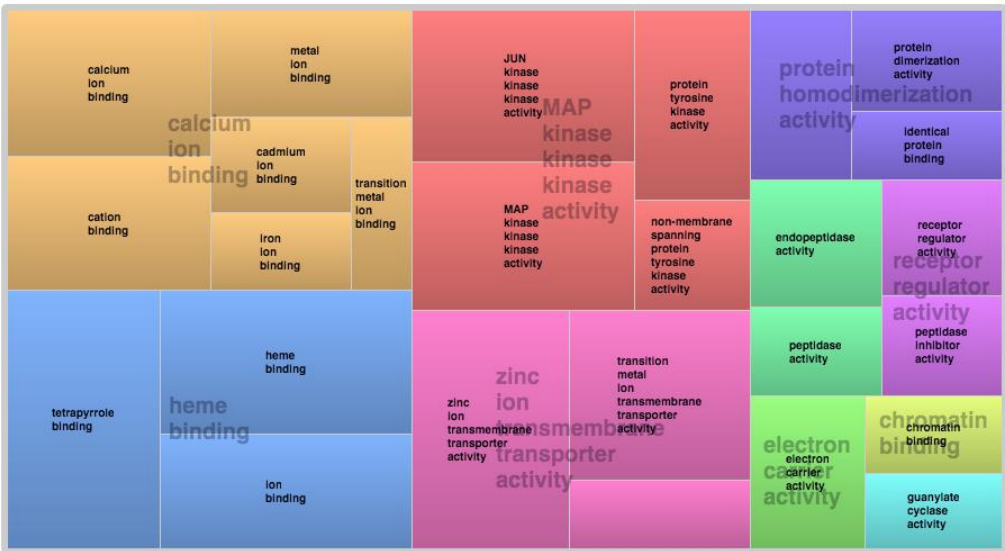

MOLECULAR FUNCTION

UPREGULATED in both NPs and ions *versus* control

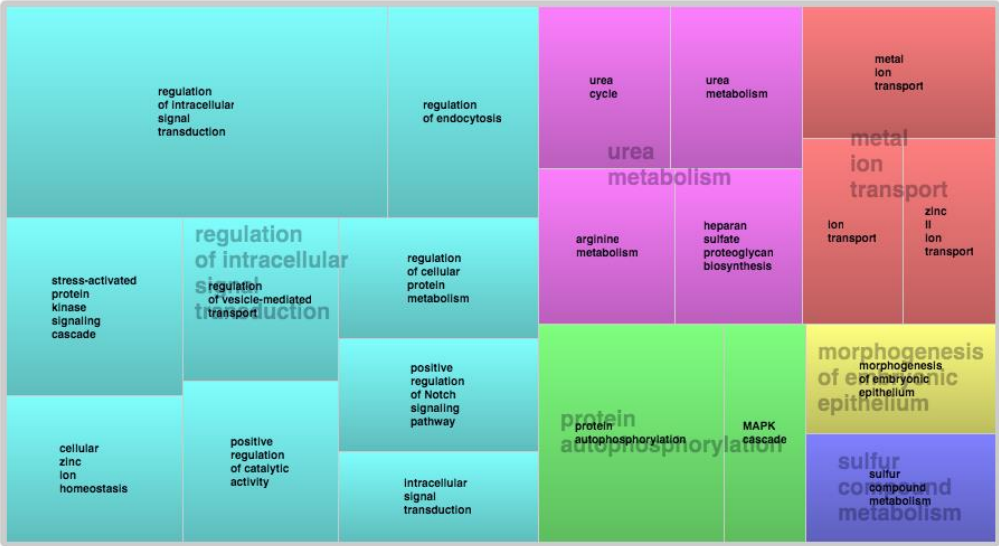

BIOLOGICAL PROCESS

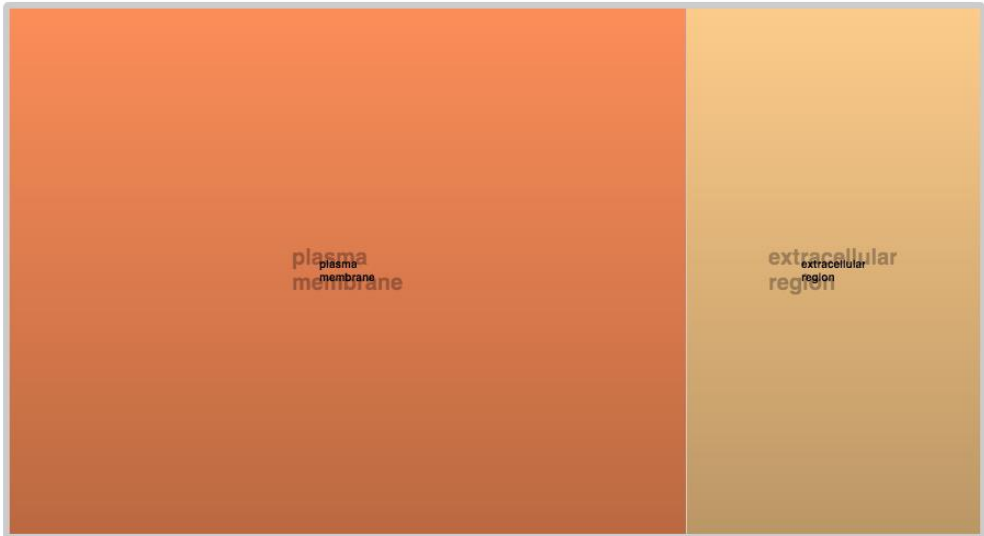

CELLULAR COMPONENT

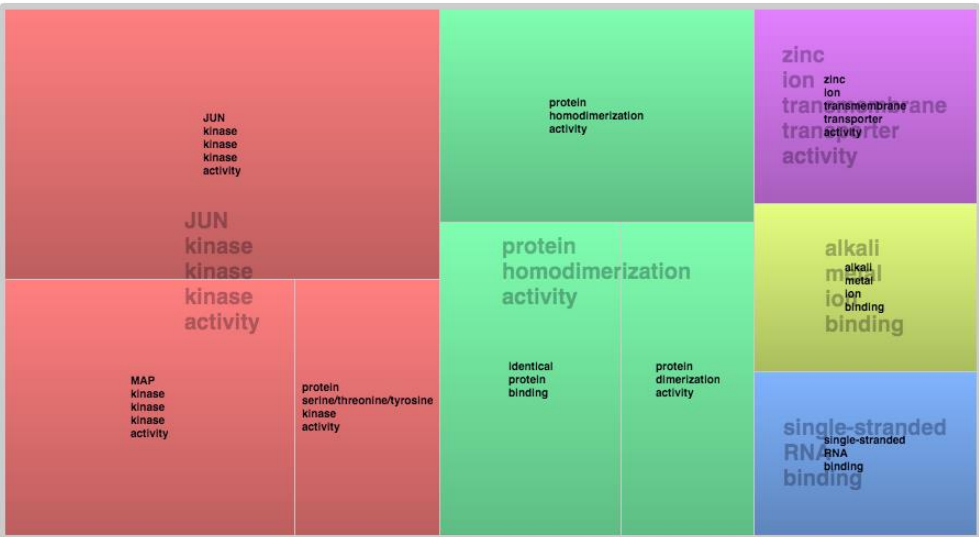

MOLECULAR FUNCTION

DOWNREGULATED in both NPs and Ions *versus* control

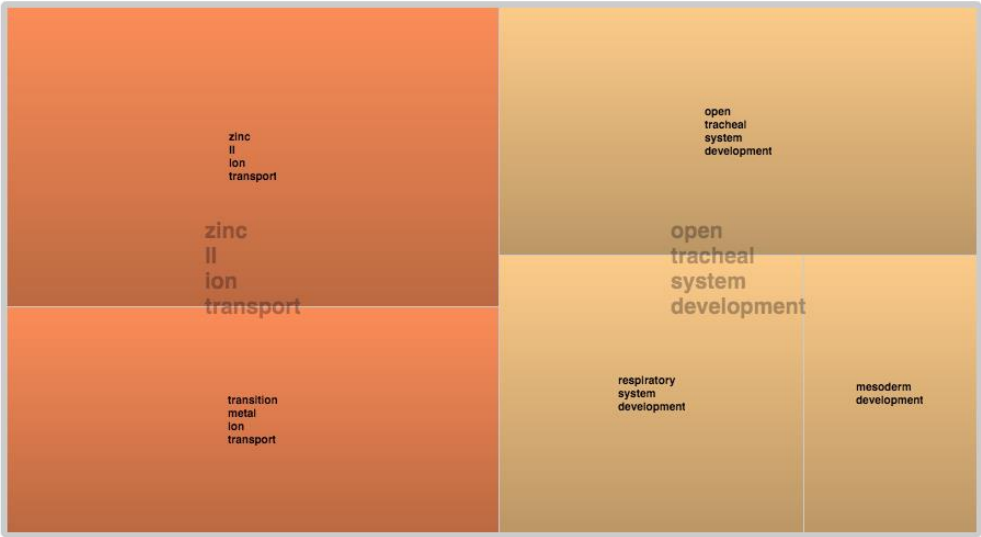

BIOLOGICAL PROCESS

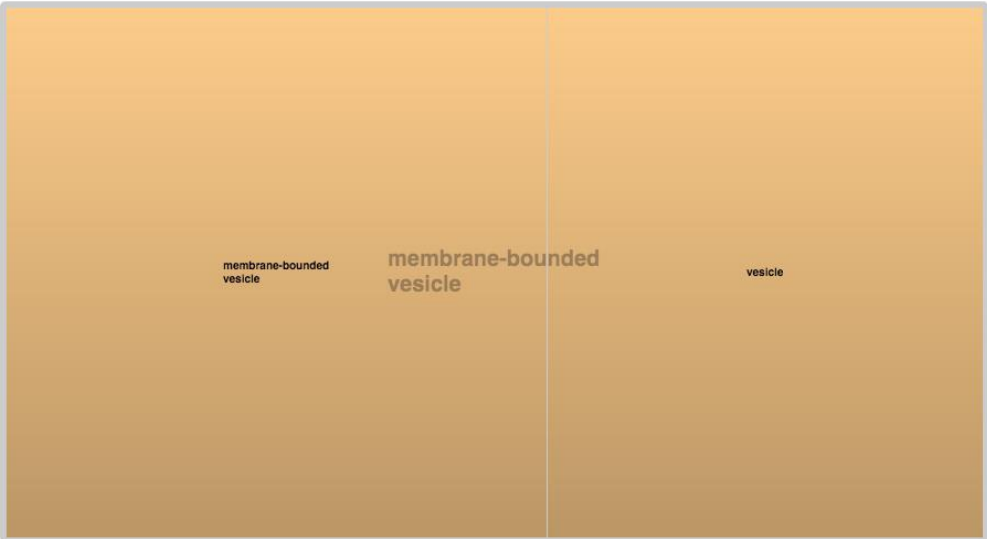

CELLULAR COMPONENT

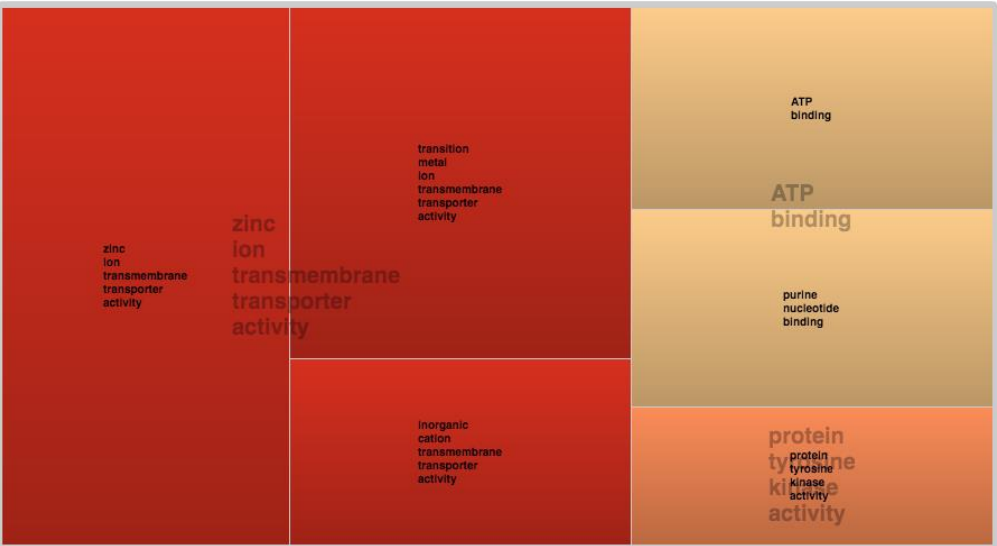

MOLECULAR FUNCTION
